# Supplementary material
Source: publisher figshare collection journal article supplement (https://gsapubs.figshare.com/articles/dataset/_/12541265)
Supplement: Supplementary file 1 [file 1]

Mason, C.C., et al., 2019, Detrital zircons reveal sea-level and hydroclimate controls on Amazon River to deep-sea fan sediment transfer: *Geology*, <https://doi.org/10.1130/G45852.1>

**Description of Supplementary Materials for “Detrital zircons reveal sea-level and hydroclimate controls on Amazon river-to- deep-sea fan sediment transfer”**

The supplementary materials consist of four tables, two data files, one figure, explanations for mixture modeling discussed in the main text, and ten image (.jpg) files.

**Contents**

- i. Supplementary Table 1: Fractions of DZ ages across the onshore and offshore Amazon system (this document)
- ii. Supplementary Data File 1: ODP Amazon fan Samples. (2019206\_Data File DR1.xlsx)
- iii. Supplementary Data File 2: Amazon DZ DATA for Geology. (2019206\_Data File DR2.xls)
- iv. Supplementary Figure 1: kernel density estimates (KDEs) and cumulative distribution functions (CDFs) for detrital zircon samples from the onshore Amazon system (this document).
- v. Supplementary Table 2: Cross correlation coefficients for detrital zircon samples from the Amazon Fan (this document).
- vi. Supplementary Table 3: Published detrital zircon samples used in mixture models (this document).
- vii. Supplementary Table 4: Unmixing coefficients for DZ samples from the modern lower Amazon and Pleistocene Amazon submarine fan (this document).
- viii. Supplementary Table 5: U-Pb age data from Mapes (2009) Thesis. (2019206\_Table DR5.pdf)
- ix. Supplementary image files (.jpg) of DZ grain mounts with annotated grain IDs. (2019206 Image Files.zip)

**Supplementary Table 1: Fractions of detrital zircon ages in the onshore upper and lower Amazon River and submarine fan**

|               | Mapes (2009)<br>samples 1-12<br>Upper<br>Amazon | Mapes (2009) samples 13-15+<br>Campbell and Allen (2008) samples<br>Lower Amazon | upper +<br>lower<br>Amazon | all<br>fan |
|---------------|-------------------------------------------------|----------------------------------------------------------------------------------|----------------------------|------------|
| <550          | 41                                              | 25                                                                               | 37                         | 31         |
| 550-<br>900   | 14                                              | 17                                                                               | 15                         | 16         |
| 900-<br>1300  | 32                                              | 22                                                                               | 29                         | 29         |
| 1300-<br>1500 | 5                                               | 9                                                                                | 6                          | 5          |
| 1500-<br>1800 | 5                                               | 11                                                                               | 7                          | 7          |
| 1800-<br>2000 | 1                                               | 8                                                                                | 3                          | 5          |
| 2000-<br>2250 | 1                                               | 3                                                                                | 2                          | 4          |
| >2250         | 1                                               | 4                                                                                | 1                          | 2          |

*Age bins corresponds to pie 'slices' in main text Fig. 1*

Data from Mapes (2009), Campbell and Allen (2008). See Mapes (2009) for reference to Sample numbers.

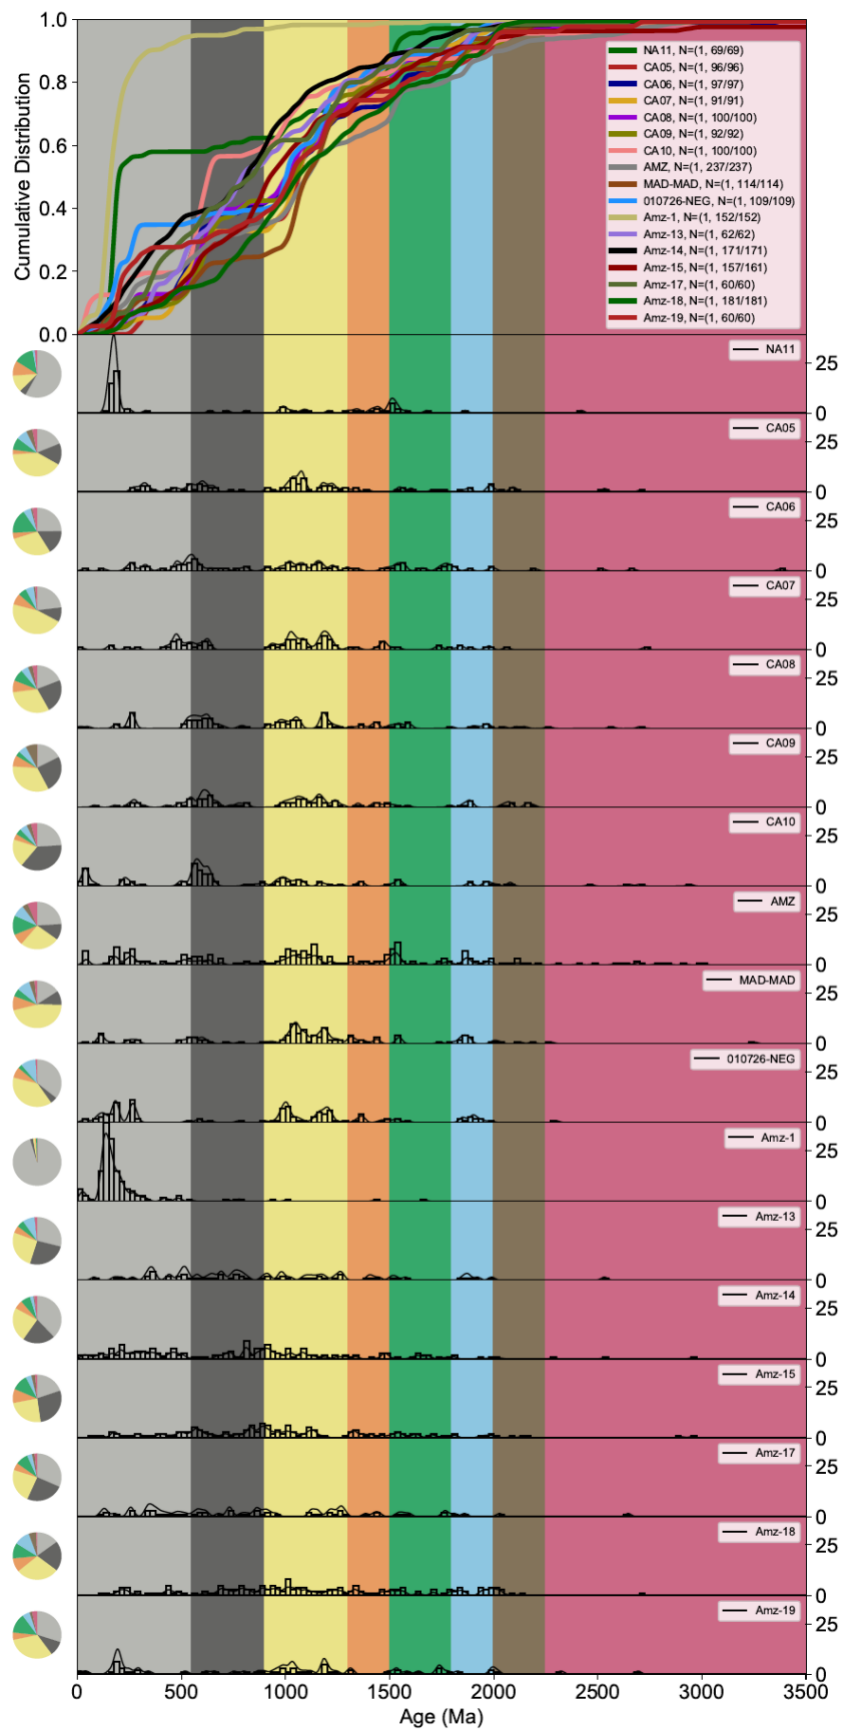

**Supplementary Figure 1:** Cumulative distribution functions, pie charts, kernel density estimates and histograms for all onshore Amazon system detrital zircon data used in the main text. U-Pb ages binned at 25 Myr intervals. Sample codes: NA = northern Andes, CA = central Andes (Pepper et al., 2016), AMZ = lower Amazon River (Campbell and Allen, 2008), MAD = Madeira River of Campbell and Allen (2008), NEG = Negro River (Campbell and Allen 2008), AMZ-1 through AMZ-19 from Mapes (2009). Figure produced using code from Sharman et al. (2018).

**Supplementary Table 2: Cross-correlation of kernel density estimation**  
(after Saylor and Sundell, 2016)

| sample | # grains (n) | 945-1 | 946-2 | 946-3 | 946-4 | 946-5 | 946-6 | 946-7 | 936-2 | 946-8 | 946-9 |
|--------|--------------|-------|-------|-------|-------|-------|-------|-------|-------|-------|-------|
| 945-1  | 137          | 1     | 0.584 | 0.517 | 0.389 | 0.588 | 0.610 | 0.450 | 0.413 | 0.369 | 0.494 |
| 946-2  | 129          | 0.584 | 1     | 0.401 | 0.433 | 0.605 | 0.451 | 0.382 | 0.446 | 0.378 | 0.551 |
| 946-3  | 129          | 0.517 | 0.401 | 1     | 0.402 | 0.425 | 0.401 | 0.313 | 0.319 | 0.346 | 0.488 |
| 946-4  | 131          | 0.389 | 0.433 | 0.402 | 1     | 0.422 | 0.394 | 0.332 | 0.536 | 0.411 | 0.440 |
| 946-5  | 138          | 0.588 | 0.605 | 0.425 | 0.422 | 1     | 0.641 | 0.405 | 0.474 | 0.530 | 0.575 |
| 946-6  | 145          | 0.610 | 0.451 | 0.401 | 0.394 | 0.641 | 1     | 0.526 | 0.433 | 0.565 | 0.414 |
| 946-7  | 143          | 0.450 | 0.382 | 0.313 | 0.332 | 0.405 | 0.526 | 1     | 0.441 | 0.497 | 0.322 |
| 936-2  | 135          | 0.413 | 0.446 | 0.319 | 0.536 | 0.474 | 0.433 | 0.441 | 1     | 0.391 | 0.401 |
| 946-8  | 135          | 0.369 | 0.378 | 0.346 | 0.411 | 0.530 | 0.565 | 0.497 | 0.391 | 1     | 0.445 |
| 946-9  | 142          | 0.494 | 0.551 | 0.488 | 0.440 | 0.575 | 0.414 | 0.322 | 0.401 | 0.445 | 1     |

## **Selecting Detrital Zircon Samples for Mixture Models**

We use U-Pb detrital zircon (DZ) geochronology and mixture modeling to quantify relative contributions of sediment from geographically and geologically distinct sources within the Amazon catchment to: (1) the modern lower Amazon River, and (2) the Pleistocene Amazon submarine fan. While several major tributaries to the Amazon River have been sampled for U-Pb DZ dating of modern river sands (the Negro, Madeira, Purus), many large tributaries are not characterized yet in published literature. Thus, we created parent end members for mixture models based on the geography of existing samples within the Amazon drainage basin. The end-member sediment source areas are the Central Andes, the Northern Andes, and a cratonic source characterized by samples from the Negro River (See Supplementary Table 3 below). Samples and data sources for onshore DZ data are presented below in Supplementary Table 3.

## **Statistical Treatment of Detrital Zircon U-Pb Age Data**

We apply a top-down sediment unmixing approach (sensu Sharman and Johnstone, 2017; Mason et al., 2017; Fildani et al., 2018). Following published methods, we calculate mixing coefficients of parent components present in daughter composites using U-Pb detrital zircon ages in samples from the modern onshore Amazon system and Pleistocene submarine fan (after Amidon et al., 2005; Mason et al., 2017; Fildani et al., 2018). For a discussion of the implicit assumptions of our mixture model, see Mason et al. (2017).

## **RESULTS**

The result of mixture models are discussed in the main text, and presented below in Supplementary Table 4.

25 **Supplementary Table 3: Published detrital zircon samples used in mixture models**

| Component/composite Name       | Sample ID  | n   | River/location                  | Latitude | Longitude | Data Source                            |
|--------------------------------|------------|-----|---------------------------------|----------|-----------|----------------------------------------|
| Northern Andes component       | NA11       | 69  | Tena River                      | -1.0438  | -77.7967  | Pepper et al., 2016; Geosphere         |
|                                | Amz-1      | 152 | Napo River                      | 0.04857  | -77.3057  | Mapes, RW, 2009 - Dissertation         |
| Craton component (Negro River) | Amz-18     | 181 | Negro River                     | -2.4352  | -61.0622  | Mapes, RW, 2009 - Dissertation         |
|                                | Amz-19     | 60  | Negro River                     | -3.1807  | -60.0054  | Mapes, RW, 2009 - Dissertation         |
|                                | 010726-NEG | 109 | Negro River                     | -3.1429  | -60.12423 | Campbell & Allen, 2008 - Nature Geosci |
|                                |            |     |                                 |          |           |                                        |
| Central Andes Component        | Amz-17     | 60  | Purus River                     | -4.026   | -61.514   | Mapes, RW, 2009 - Dissertation         |
|                                | MAD-MAD    | 114 | Madeira River                   | -3.66899 | -59.06288 | Campbell & Allen, 2008 - Nature Geosci |
|                                | CA05       | 96  | Hualaga River                   | -5.89649 | -76.1025  | Pepper et al., 2016; Geosphere         |
|                                | CA06       | 97  | Ucayali River (Pucalpa Ox Bow)  | -8.33793 | -74.5946  | Pepper et al., 2016; Geosphere         |
|                                | CA07       | 91  | Huanuco River                   | -9.65693 | -76.7189  | Pepper et al., 2016; Geosphere         |
|                                | CA08       | 100 | Unnamed river (La Union pueblo) | -9.7608  | -76.796   | Pepper et al., 2016; Geosphere         |
|                                | CA09       | 92  | Madre de Dios River             | -12.6    | -69.094   | Pepper et al., 2016; Geosphere         |
|                                | CA10       | 100 | Pachachaca Abancay River        | -13.6613 | -72.9379  | Pepper et al., 2016; Geosphere         |
|                                |            |     |                                 |          |           |                                        |
|                                |            |     |                                 |          |           |                                        |
| Lower Amazon Composite         | AMZ        | 237 | Amazon River                    | -1.49762 | -52.1511  | Campbell & Allen, 2008 - Nature Geosci |
|                                | Amz-13     | 62  | Amazon River                    | -3.3742  | -58.7233  | Mapes, RW, 2009 - Dissertation         |
|                                | Amz-14     | 171 | Amazon River                    | -2.2835  | -56.3744  | Mapes, RW, 2009 - Dissertation         |
|                                | Amz-15     | 161 | Amazon River                    | -2.4326  | -54.3714  | Mapes, RW, 2009 - Dissertation         |
|                                |            |     |                                 |          |           |                                        |
| Submarine Fan Composite        | 945-1      | 137 | submarine fan                   | 6.9503   | -47.9288  | This study                             |
|                                | 946-2      | 129 | submarine fan                   | 6.9496   | -47.9193  | This study                             |
|                                | 946-3      | 128 | submarine fan                   | 6.9496   | -47.9193  | This study                             |
|                                | 946-4      | 131 | submarine fan                   | 6.9496   | -47.9193  | This study                             |
|                                | 946-5      | 138 | submarine fan                   | 6.9496   | -47.9193  | This study                             |
|                                | 946-6      | 145 | submarine fan                   | 6.9496   | -47.9193  | This study                             |
|                                | 946-7      | 143 | submarine fan                   | 6.9496   | -47.9193  | This study                             |
|                                | 936-2      | 134 | submarine fan                   | 5.6322   | -47.7355  | This study                             |
|                                | 946-8      | 135 | submarine fan                   | 6.9496   | -47.9193  | This study                             |
|                                | 946-9      | 142 | submarine fan                   | 6.9496   | -47.9193  | This study                             |

26

27

28

29

**Supplementary Table 4: Unmixing coefficients for DZ samples from the modern lower Amazon and Pleistocene Amazon submarine fan**

| Sample ID                     | Northern Andes | Craton (Negro) | Central Andes |
|-------------------------------|----------------|----------------|---------------|
| Lower Amazon (Holocene)       | 0.00           | 0.67           | 0.33          |
| 945-1 (MIS-2)                 | 0.08           | 0.26           | 0.66          |
| 945-1 (MIS-2)                 | 0.03           | 0.38           | 0.59          |
| 945-1 (MIS-2)                 | 0.06           | 0.23           | 0.72          |
| 945-1 (MIS-2)                 | 0.00           | 0.00           | 1.00          |
| 946-5 (MIS-3/4)               | 0.02           | 0.29           | 0.68          |
| 946-5 (MIS-3/4)               | 0.06           | 0.00           | 0.94          |
| 946-5 (MIS-3/4)               | 0.07           | 0.07           | 0.87          |
| 936-2 (MIS-6)                 | 0.07           | 0.12           | 0.81          |
| 936-2 (MIS-6)                 | 0.07           | 0.02           | 0.91          |
| 936-2 (MIS-6)                 | 0.11           | 0.16           | 0.73          |
| All fan samples (Pleistocene) | 0.05           | 0.17           | 0.78          |

## SUPPLEMENTARY REFERENCES

- Amidon, W.H., Burbank, D.W., Gehrels, G.E., 2005. Construction of detrital mineral populations: insights from mixing of U-Pb zircon ages in Himalayan rivers. *Basin Res.* 17, 463–485. doi:10.1111/j.1365-2117.2005.00279.x
- Fildani, A., McKay, M.P., Stockli, D., Clark, J., Dykstra, M.L., Stockli, L., Hessler, A.M., 2016. The ancestral Mississippi drainage archived in the late Wisconsin Mississippi deep-sea fan. *Geology* 44, 479–482. doi:10.1130/G37657.1
- Mason, C.C., Fildani, A., Gerber, T., Blum, M.D., Clark, J.D., Dykstra, M., 2017. Climatic and anthropogenic influences on sediment mixing in the Mississippi source-to-sink system using detrital zircons: Late Pleistocene to recent. *Earth Planet. Sci. Lett.* 466, 70–79. doi:10.1016/j.epsl.2017.03.001
- Sharman, G.R., Johnstone, S.A., 2017. Sediment unmixing using detrital geochronology. *Earth Planet. Sci. Lett.* 477, 183–194. doi:10.1016/j.epsl.2017.07.04

45 Sharman, G.R., Sharman, J.P., Sylvester, Z., 2018. detritalPy : A Python - based toolset for  
46 visualizing and analysing detrital geo - thermochronologic data 202–215.  
47 doi:10.1002/dep2.45

48

49

50

51
