# Supplementary material
Source: publisher figshare collection journal article supplement (https://gsapubs.figshare.com/articles/dataset/_/12541265)
Supplement: Supplementary file 2 [file 1]

| $^{206}\text{Pb}^*/^{238}\text{U}$                      | $\pm 2\sigma$<br>(abs) | $^{207}\text{Pb}^*/^{235}\text{U}$ | $\pm 2\sigma$<br>(abs) | $^{207}\text{Pb}^*/^{206}\text{Pb}^*$ | $\pm 2\sigma$<br>(abs) | corr.<br>coef. | $^{206}\text{Pb}^*/^{238}\text{U}$<br>age<br>(Ma) | $\pm 2\sigma$<br>(Ma) | $^{207}\text{Pb}^*/^{235}\text{U}$<br>age<br>(Ma) | $\pm 2\sigma$<br>(Ma) | $^{207}\text{Pb}^*/^{206}\text{Pb}^*$<br>age<br>(Ma) | $\pm 2\sigma$<br>(Ma) | Length<br>( $\mu\text{m}$ ) | Width<br>( $\mu\text{m}$ ) | Accept/<br>Reject |
|---------------------------------------------------------|------------------------|------------------------------------|------------------------|---------------------------------------|------------------------|----------------|---------------------------------------------------|-----------------------|---------------------------------------------------|-----------------------|------------------------------------------------------|-----------------------|-----------------------------|----------------------------|-------------------|
| <b>1. Aguarico River, Ecuador (0.0486°N, 77.3057°W)</b> |                        |                                    |                        |                                       |                        |                |                                                   |                       |                                                   |                       |                                                      |                       |                             |                            |                   |
| 0.02331                                                 | 0.00063                | 0.044                              | 0.020                  | 0.014                                 | 0.013                  | 0.365          | 43                                                | 20                    | 149                                               | 4                     |                                                      |                       | 151                         | 115                        | r                 |
| 0.02092                                                 | 0.00069                | 0.056                              | 0.014                  | 0.0195                                | 0.0072                 | 0.559          | 56                                                | 14                    | 133                                               | 4                     |                                                      |                       | 272                         | 127                        | r                 |
| 0.03617                                                 | 0.00090                | 0.122                              | 0.046                  | 0.024                                 | 0.019                  | 0.663          | 117                                               | 41                    | 229                                               | 6                     |                                                      |                       | 172                         | 85                         | r                 |
| 0.02240                                                 | 0.00052                | 0.0764                             | 0.0085                 | 0.0247                                | 0.0052                 | 0.472          | 75                                                | 8                     | 143                                               | 3                     |                                                      |                       | 209                         | 129                        | r                 |
| 0.01921                                                 | 0.00061                | 0.068                              | 0.014                  | 0.0257                                | 0.0075                 | 0.529          | 67                                                | 13                    | 123                                               | 4                     |                                                      |                       | 218                         | 140                        | r                 |
| 0.01827                                                 | 0.00040                | 0.0648                             | 0.0095                 | 0.0257                                | 0.0073                 | 0.305          | 64                                                | 9                     | 117                                               | 3                     |                                                      |                       | 241                         | 115                        | r                 |
| 0.02434                                                 | 0.00065                | 0.089                              | 0.029                  | 0.027                                 | 0.016                  | 0.514          | 87                                                | 27                    | 155                                               | 4                     |                                                      |                       | 178                         | 125                        | r                 |
| 0.02221                                                 | 0.00048                | 0.0835                             | 0.0082                 | 0.0273                                | 0.0055                 | 0.415          | 81                                                | 8                     | 142                                               | 3                     |                                                      |                       | 145                         | 101                        | r                 |
| 0.02052                                                 | 0.00050                | 0.080                              | 0.010                  | 0.0284                                | 0.0069                 | 0.410          | 78                                                | 10                    | 131                                               | 3                     |                                                      |                       | 185                         | 122                        | r                 |
| 0.01861                                                 | 0.00057                | 0.075                              | 0.023                  | 0.029                                 | 0.013                  | 0.511          | 73                                                | 22                    | 119                                               | 4                     |                                                      |                       | 293                         | 161                        | r                 |
| 0.02342                                                 | 0.00060                | 0.095                              | 0.013                  | 0.0293                                | 0.0082                 | 0.462          | 92                                                | 12                    | 149                                               | 4                     |                                                      |                       | 234                         | 98                         | r                 |
| 0.02364                                                 | 0.00065                | 0.100                              | 0.018                  | 0.031                                 | 0.012                  | 0.429          | 96                                                | 17                    | 151                                               | 4                     |                                                      |                       | 146                         | 126                        | r                 |
| 0.01931                                                 | 0.00045                | 0.085                              | 0.016                  | 0.032                                 | 0.012                  | 0.364          | 83                                                | 15                    | 123                                               | 3                     |                                                      |                       | 180                         | 108                        | r                 |
| 0.02272                                                 | 0.00073                | 0.101                              | 0.015                  | 0.0324                                | 0.0069                 | 0.622          | 98                                                | 14                    | 145                                               | 5                     |                                                      |                       | 300                         | 127                        | r                 |
| 0.02397                                                 | 0.00072                | 0.108                              | 0.021                  | 0.033                                 | 0.013                  | 0.460          | 104                                               | 19                    | 153                                               | 5                     |                                                      |                       | 147                         | 112                        | r                 |
| 0.02009                                                 | 0.00051                | 0.0911                             | 0.0081                 | 0.0329                                | 0.0056                 | 0.400          | 89                                                | 8                     | 128                                               | 3                     |                                                      |                       | 138                         | 98                         | r                 |
| 0.00315                                                 | 0.00011                | 0.0143                             | 0.0048                 | 0.033                                 | 0.017                  | *              | 14                                                | 5                     | 20                                                | 1                     |                                                      |                       | 217                         | 203                        | a                 |
| 0.02130                                                 | 0.00053                | 0.104                              | 0.015                  | 0.036                                 | 0.010                  | 0.445          | 101                                               | 14                    | 136                                               | 3                     |                                                      |                       | 212                         | 130                        | a                 |
| 0.02551                                                 | 0.00063                | 0.128                              | 0.013                  | 0.0363                                | 0.0069                 | 0.558          | 122                                               | 12                    | 162                                               | 4                     |                                                      |                       | 150                         | 83                         | a                 |
| 0.02056                                                 | 0.00067                | 0.107                              | 0.018                  | 0.0377                                | 0.0094                 | 0.577          | 103                                               | 17                    | 131                                               | 4                     |                                                      |                       | 168                         | 150                        | a                 |
| 0.02193                                                 | 0.00086                | 0.115                              | 0.040                  | 0.038                                 | 0.025                  | 0.460          | 110                                               | 36                    | 140                                               | 5                     |                                                      |                       | 125                         | 110                        | a                 |
| 0.01850                                                 | 0.00054                | 0.102                              | 0.017                  | 0.0402                                | 0.0098                 | 0.521          | 99                                                | 16                    | 118                                               | 3                     |                                                      |                       | 257                         | 154                        | a                 |
| 0.03226                                                 | 0.00071                | 0.180                              | 0.017                  | 0.0405                                | 0.0068                 | 0.686          | 168                                               | 15                    | 205                                               | 4                     |                                                      |                       | 154                         | 127                        | a                 |
| 0.003447                                                | 0.000078               | 0.0194                             | 0.0023                 | 0.0409                                | 0.0093                 | *              | 20                                                | 2                     | 22                                                | 1                     |                                                      |                       | 213                         | 77                         | a                 |
| 0.01965                                                 | 0.00078                | 0.112                              | 0.013                  | 0.0413                                | 0.0070                 | 0.575          | 108                                               | 12                    | 125                                               | 5                     |                                                      |                       | 303                         | 132                        | a                 |
| 0.03727                                                 | 0.00081                | 0.213                              | 0.011                  | 0.0415                                | 0.0040                 | 0.703          | 196                                               | 9                     | 236                                               | 5                     |                                                      |                       | 123                         | 97                         | a                 |
| 0.01920                                                 | 0.00067                | 0.111                              | 0.028                  | 0.042                                 | 0.016                  | 0.539          | 107                                               | 26                    | 123                                               | 4                     |                                                      |                       | 265                         | 187                        | a                 |
| 0.02398                                                 | 0.00054                | 0.1434                             | 0.0074                 | 0.0434                                | 0.0039                 | 0.565          | 136                                               | 7                     | 153                                               | 3                     |                                                      |                       | 188                         | 65                         | a                 |
| 0.02429                                                 | 0.00052                | 0.1455                             | 0.0035                 | 0.0434                                | 0.0010                 | 0.769          | 138                                               | 3                     | 155                                               | 3                     |                                                      |                       | 289                         | 162                        | a                 |
| 0.0085                                                  | 0.0027                 | 0.05                               | 0.13                   | 0.04                                  | 0.22                   | *              | 51                                                | 126                   | 55                                                | 17                    |                                                      |                       | 300                         | 156                        | a                 |
| 0.03200                                                 | 0.00099                | 0.194                              | 0.015                  | 0.0440                                | 0.0044                 | 0.760          | 180                                               | 13                    | 203                                               | 6                     |                                                      |                       | 162                         | 121                        | a                 |
| 0.01783                                                 | 0.00062                | 0.110                              | 0.038                  | 0.045                                 | 0.023                  | 0.496          | 106                                               | 35                    | 114                                               | 4                     |                                                      |                       | 270                         | 224                        | a                 |
| 0.01821                                                 | 0.00057                | 0.112                              | 0.016                  | 0.0446                                | 0.0092                 | 0.520          | 108                                               | 14                    | 116                                               | 4                     |                                                      |                       | 300                         | 170                        | a                 |
| 0.0454                                                  | 0.0017                 | 0.280                              | 0.015                  | 0.0448                                | 0.0026                 | 0.856          | 251                                               | 12                    | 286                                               | 10                    |                                                      |                       | 124                         | 103                        | a                 |
| 0.02436                                                 | 0.00058                | 0.151                              | 0.013                  | 0.0450                                | 0.0084                 | 0.478          | 143                                               | 12                    | 155                                               | 4                     |                                                      |                       | 144                         | 96                         | a                 |
| 0.0425                                                  | 0.0016                 | 0.264                              | 0.020                  | 0.0450                                | 0.0056                 | 0.780          | 238                                               | 16                    | 268                                               | 10                    |                                                      |                       | 199                         | 112                        | a                 |
| 0.02963                                                 | 0.00060                | 0.1850                             | 0.0057                 | 0.0453                                | 0.0022                 | 0.697          | 172                                               | 5                     | 188                                               | 4                     |                                                      |                       | 246                         | 84                         | a                 |
| 0.03110                                                 | 0.00064                | 0.1954                             | 0.0088                 | 0.0456                                | 0.0039                 | 0.647          | 181                                               | 7                     | 197                                               | 4                     |                                                      |                       | 130                         | 71                         | a                 |
| 0.03030                                                 | 0.00077                | 0.196                              | 0.031                  | 0.047                                 | 0.011                  | 0.713          | 182                                               | 26                    | 192                                               | 5                     | 42                                                   | 567                   | 259                         | 100                        | a                 |
| 0.02446                                                 | 0.00067                | 0.160                              | 0.013                  | 0.0473                                | 0.0071                 | 0.551          | 150                                               | 11                    | 156                                               | 4                     | 67                                                   | 355                   | 133                         | 115                        | a                 |
| 0.01980                                                 | 0.00046                | 0.129                              | 0.011                  | 0.0474                                | 0.0074                 | 0.418          | 124                                               | 10                    | 126                                               | 3                     | 69                                                   | 370                   | 158                         | 122                        | a                 |
| 0.02417                                                 | 0.00099                | 0.159                              | 0.047                  | 0.048                                 | 0.027                  | 0.516          | 150                                               | 41                    | 154                                               | 6                     | 80                                                   | 1371                  | 217                         | 213                        | a                 |
| 0.01956                                                 | 0.00057                | 0.1298                             | 0.0060                 | 0.0481                                | 0.0026                 | 0.657          | 124                                               | 5                     | 125                                               | 4                     | 107                                                  | 127                   | 204                         | 156                        | a                 |
| 0.03437                                                 | 0.00072                | 0.230                              | 0.012                  | 0.0486                                | 0.0048                 | 0.681          | 210                                               | 10                    | 218                                               | 4                     | 128                                                  | 233                   | 103                         | 70                         | a                 |
| 0.03239                                                 | 0.00098                | 0.2179                             | 0.0087                 | 0.0488                                | 0.0018                 | 0.832          | 200                                               | 7                     | 206                                               | 6                     | 137                                                  | 88                    | 180                         | 119                        | a                 |
| 0.02535                                                 | 0.00072                | 0.1718                             | 0.0062                 | 0.0492                                | 0.0016                 | 0.795          | 161                                               | 5                     | 161                                               | 5                     | 155                                                  | 76                    | 226                         | 130                        | a                 |
| 0.01924                                                 | 0.00043                | 0.1328                             | 0.0070                 | 0.0500                                | 0.0047                 | 0.430          | 127                                               | 6                     | 123                                               | 3                     | 197                                                  | 218                   | 152                         | 95                         | a                 |
| 0.02035                                                 | 0.00066                | 0.141                              | 0.015                  | 0.0503                                | 0.0077                 | 0.589          | 134                                               | 14                    | 130                                               | 4                     | 210                                                  | 354                   | 250                         | 145                        | a                 |
| 0.0298                                                  | 0.0012                 | 0.209                              | 0.011                  | 0.0509                                | 0.0024                 | 0.824          | 193                                               | 9                     | 189                                               | 8                     | 235                                                  | 108                   | 165                         | 123                        | a                 |
| 0.02698                                                 | 0.00082                | 0.1916                             | 0.0075                 | 0.0515                                | 0.0019                 | 0.801          | 178                                               | 6                     | 172                                               | 5                     | 263                                                  | 84                    | 183                         | 136                        | a                 |

| $^{206}\text{Pb}^*/^{238}\text{U}$ | $\pm 2\sigma$<br>(abs) | $^{207}\text{Pb}^*/^{235}\text{U}$ | $\pm 2\sigma$<br>(abs) | $^{207}\text{Pb}^*/^{206}\text{Pb}^*$ | $\pm 2\sigma$<br>(abs) | corr.<br>coef. | $^{206}\text{Pb}^*/^{238}\text{U}$<br>age<br>(Ma) | $\pm 2\sigma$<br>(Ma) | $^{207}\text{Pb}^*/^{235}\text{U}$<br>age<br>(Ma) | $\pm 2\sigma$<br>(Ma) | $^{207}\text{Pb}^*/^{206}\text{Pb}^*$<br>age<br>(Ma) | $\pm 2\sigma$<br>(Ma) | Length<br>( $\mu\text{m}$ ) | Width<br>( $\mu\text{m}$ ) | Accept/<br>Reject |
|------------------------------------|------------------------|------------------------------------|------------------------|---------------------------------------|------------------------|----------------|---------------------------------------------------|-----------------------|---------------------------------------------------|-----------------------|------------------------------------------------------|-----------------------|-----------------------------|----------------------------|-------------------|
| 0.00364                            | 0.00010                | 0.0260                             | 0.0012                 | 0.0517                                | 0.0037                 | *              | 26                                                | 1                     | 23                                                | 1                     | 272                                                  | 164                   | 133                         | 99                         | a                 |
| 0.0297                             | 0.0011                 | 0.212                              | 0.016                  | 0.0517                                | 0.0051                 | 0.750          | 195                                               | 13                    | 189                                               | 7                     | 274                                                  | 224                   | 205                         | 145                        | a                 |
| 0.02391                            | 0.00070                | 0.171                              | 0.014                  | 0.0519                                | 0.0079                 | 0.543          | 161                                               | 12                    | 152                                               | 4                     | 283                                                  | 346                   | 165                         | 115                        | a                 |
| 0.02025                            | 0.00045                | 0.1459                             | 0.0077                 | 0.0523                                | 0.0049                 | 0.460          | 138                                               | 7                     | 129                                               | 3                     | 297                                                  | 215                   | 150                         | 90                         | a                 |
| 0.02257                            | 0.00050                | 0.1635                             | 0.0065                 | 0.0525                                | 0.0034                 | 0.578          | 154                                               | 6                     | 144                                               | 3                     | 309                                                  | 146                   | 156                         | 121                        | a                 |
| 0.02082                            | 0.00047                | 0.1551                             | 0.0084                 | 0.0540                                | 0.0052                 | 0.482          | 146                                               | 7                     | 133                                               | 3                     | 372                                                  | 217                   | 140                         | 90                         | a                 |
| 0.02606                            | 0.00065                | 0.1967                             | 0.0055                 | 0.0547                                | 0.0014                 | 0.792          | 182                                               | 5                     | 166                                               | 4                     | 401                                                  | 59                    | 150                         | 79                         | a                 |
| 0.00327                            | 0.00011                | 0.0247                             | 0.0046                 | 0.055                                 | 0.020                  | *              | 25                                                | 5                     | 21                                                | 1                     | 406                                                  | 837                   | 230                         | 109                        | a                 |
| 0.01837                            | 0.00058                | 0.139                              | 0.023                  | 0.055                                 | 0.013                  | 0.523          | 132                                               | 21                    | 117                                               | 4                     | 411                                                  | 542                   | 297                         | 130                        | a                 |
| 0.02770                            | 0.00060                | 0.2107                             | 0.0047                 | 0.05517                               | 0.00065                | 0.889          | 194                                               | 4                     | 176                                               | 4                     | 419                                                  | 26                    | 186                         | 133                        | a                 |
| 0.02060                            | 0.00045                | 0.1587                             | 0.0049                 | 0.0559                                | 0.0025                 | 0.591          | 150                                               | 4                     | 131                                               | 3                     | 447                                                  | 98                    | 135                         | 110                        | a                 |
| 0.02122                            | 0.00073                | 0.165                              | 0.020                  | 0.056                                 | 0.013                  | 0.461          | 155                                               | 18                    | 135                                               | 5                     | 464                                                  | 512                   | 290                         | 88                         | a                 |
| 0.01929                            | 0.00042                | 0.1507                             | 0.0071                 | 0.0567                                | 0.0046                 | 0.449          | 143                                               | 6                     | 123                                               | 3                     | 479                                                  | 180                   | 130                         | 96                         | a                 |
| 0.02844                            | 0.00099                | 0.2228                             | 0.0090                 | 0.0568                                | 0.0024                 | 0.786          | 204                                               | 7                     | 181                                               | 6                     | 484                                                  | 94                    | 140                         | 72                         | a                 |
| 0.03424                            | 0.00088                | 0.271                              | 0.011                  | 0.0573                                | 0.0034                 | 0.750          | 243                                               | 9                     | 217                                               | 5                     | 504                                                  | 129                   | 180                         | 138                        | a                 |
| 0.01975                            | 0.00044                | 0.1569                             | 0.0090                 | 0.0576                                | 0.0060                 | 0.440          | 148                                               | 8                     | 126                                               | 3                     | 515                                                  | 229                   | 250                         | 107                        | a                 |
| 0.02096                            | 0.00053                | 0.167                              | 0.018                  | 0.058                                 | 0.012                  | 0.444          | 157                                               | 15                    | 134                                               | 3                     | 523                                                  | 439                   | 144                         | 102                        | a                 |
| 0.02905                            | 0.00067                | 0.235                              | 0.026                  | 0.059                                 | 0.013                  | 0.582          | 214                                               | 21                    | 185                                               | 4                     | 553                                                  | 498                   | 243                         | 97                         | a                 |
| 0.02052                            | 0.00087                | 0.167                              | 0.025                  | 0.059                                 | 0.016                  | 0.448          | 157                                               | 21                    | 131                                               | 5                     | 564                                                  | 598                   | 155                         | 99                         | a                 |
| 0.03677                            | 0.00089                | 0.299                              | 0.019                  | 0.0589                                | 0.0064                 | 0.726          | 265                                               | 15                    | 233                                               | 6                     | 565                                                  | 238                   | 160                         | 117                        | a                 |
| 0.02024                            | 0.00053                | 0.1646                             | 0.0097                 | 0.0590                                | 0.0061                 | 0.474          | 155                                               | 8                     | 129                                               | 3                     | 566                                                  | 225                   | 171                         | 136                        | a                 |
| 0.02007                            | 0.00046                | 0.163                              | 0.015                  | 0.0591                                | 0.0099                 | 0.424          | 154                                               | 13                    | 128                                               | 3                     | 569                                                  | 365                   | 168                         | 138                        | a                 |
| 0.0445                             | 0.0010                 | 0.365                              | 0.016                  | 0.0596                                | 0.0043                 | 0.790          | 316                                               | 12                    | 280                                               | 6                     | 589                                                  | 157                   | 103                         | 100                        | a                 |
| 0.00302                            | 0.00038                | 0.0248                             | 0.0051                 | 0.060                                 | 0.022                  | *              | 25                                                | 5                     | 19                                                | 2                     | 593                                                  | 801                   | 154                         | 69                         | a                 |
| 0.0600                             | 0.0019                 | 0.496                              | 0.016                  | 0.05990                               | 0.00051                | 0.881          | 409                                               | 11                    | 376                                               | 11                    | 600                                                  | 18                    | 130                         | 115                        | a                 |
| 0.03055                            | 0.00071                | 0.258                              | 0.017                  | 0.0612                                | 0.0070                 | 0.665          | 233                                               | 13                    | 194                                               | 4                     | 647                                                  | 245                   | 146                         | 58                         | a                 |
| 0.0333                             | 0.0014                 | 0.282                              | 0.014                  | 0.0614                                | 0.0021                 | 0.879          | 252                                               | 11                    | 211                                               | 9                     | 652                                                  | 74                    | 164                         | 108                        | a                 |
| 0.02137                            | 0.00049                | 0.181                              | 0.012                  | 0.0614                                | 0.0075                 | 0.478          | 169                                               | 10                    | 136                                               | 3                     | 652                                                  | 262                   | 210                         | 60                         | a                 |
| 0.02054                            | 0.00052                | 0.174                              | 0.021                  | 0.061                                 | 0.014                  | 0.427          | 163                                               | 19                    | 131                                               | 3                     | 653                                                  | 506                   | 150                         | 115                        | a                 |
| 0.0539                             | 0.0020                 | 0.464                              | 0.020                  | 0.0624                                | 0.0023                 | 0.904          | 387                                               | 14                    | 338                                               | 12                    | 688                                                  | 80                    | 197                         | 81                         | a                 |
| 0.0696                             | 0.0016                 | 0.603                              | 0.015                  | 0.0628                                | 0.0012                 | 0.651          | 479                                               | 10                    | 434                                               | 10                    | 702                                                  | 41                    | 130                         | 80                         | a                 |
| 0.03255                            | 0.00068                | 0.283                              | 0.029                  | 0.063                                 | 0.013                  | 0.628          | 253                                               | 23                    | 206                                               | 4                     | 710                                                  | 451                   | 167                         | 85                         | a                 |
| 0.0285                             | 0.0014                 | 0.250                              | 0.050                  | 0.064                                 | 0.024                  | 0.610          | 227                                               | 41                    | 181                                               | 9                     | 731                                                  | 812                   | 162                         | 140                        | a                 |
| 0.02110                            | 0.00064                | 0.189                              | 0.029                  | 0.065                                 | 0.019                  | 0.445          | 176                                               | 25                    | 135                                               | 4                     | 773                                                  | 620                   | 139                         | 135                        | r                 |
| 0.1291                             | 0.0033                 | 1.157                              | 0.040                  | 0.0650                                | 0.0024                 | 0.664          | 780                                               | 19                    | 782                                               | 19                    | 775                                                  | 77                    | 154                         | 118                        | a                 |
| 0.01835                            | 0.00074                | 0.165                              | 0.011                  | 0.0651                                | 0.0070                 | 0.471          | 155                                               | 10                    | 117                                               | 5                     | 779                                                  | 226                   | 135                         | 68                         | r                 |
| 0.02575                            | 0.00060                | 0.2318                             | 0.0087                 | 0.0653                                | 0.0038                 | 0.648          | 212                                               | 7                     | 164                                               | 4                     | 783                                                  | 124                   | 125                         | 117                        | a                 |
| 0.0419                             | 0.0025                 | 0.378                              | 0.055                  | 0.065                                 | 0.017                  | 0.757          | 326                                               | 40                    | 265                                               | 16                    | 787                                                  | 540                   | 229                         | 226                        | a                 |
| 0.0256                             | 0.0015                 | 0.235                              | 0.030                  | 0.066                                 | 0.015                  | 0.584          | 214                                               | 25                    | 163                                               | 9                     | 819                                                  | 486                   | 120                         | 61                         | r                 |
| 0.02701                            | 0.00081                | 0.2482                             | 0.0089                 | 0.0666                                | 0.0025                 | 0.774          | 225                                               | 7                     | 172                                               | 5                     | 827                                                  | 79                    | 127                         | 62                         | r                 |
| 0.02538                            | 0.00060                | 0.235                              | 0.019                  | 0.067                                 | 0.010                  | 0.565          | 214                                               | 16                    | 162                                               | 4                     | 843                                                  | 323                   | 130                         | 127                        | r                 |
| 0.02407                            | 0.00090                | 0.226                              | 0.041                  | 0.068                                 | 0.024                  | 0.525          | 207                                               | 34                    | 153                                               | 6                     | 872                                                  | 725                   | 158                         | 120                        | r                 |
| 0.02592                            | 0.00064                | 0.245                              | 0.030                  | 0.068                                 | 0.017                  | 0.530          | 222                                               | 25                    | 165                                               | 4                     | 882                                                  | 522                   | 157                         | 90                         | r                 |
| 0.03300                            | 0.00097                | 0.311                              | 0.024                  | 0.0684                                | 0.0091                 | 0.693          | 275                                               | 18                    | 209                                               | 6                     | 882                                                  | 275                   | 245                         | 58                         | r                 |
| 0.0237                             | 0.0010                 | 0.225                              | 0.041                  | 0.069                                 | 0.024                  | 0.528          | 206                                               | 34                    | 151                                               | 6                     | 896                                                  | 708                   | 190                         | 52                         | r                 |
| 0.0673                             | 0.0025                 | 0.647                              | 0.027                  | 0.0698                                | 0.0026                 | 0.924          | 507                                               | 17                    | 420                                               | 15                    | 921                                                  | 77                    | 133                         | 93                         | a                 |
| 0.02674                            | 0.00059                | 0.2581                             | 0.0079                 | 0.0700                                | 0.0030                 | 0.698          | 233                                               | 6                     | 170                                               | 4                     | 929                                                  | 88                    | 185                         | 90                         | r                 |
| 0.1058                             | 0.0031                 | 1.035                              | 0.031                  | 0.07098                               | 0.00092                | 0.871          | 722                                               | 15                    | 648                                               | 18                    | 957                                                  | 27                    | 157                         | 121                        | a                 |
| 0.02020                            | 0.00050                | 0.200                              | 0.019                  | 0.072                                 | 0.013                  | 0.425          | 185                                               | 16                    | 129                                               | 3                     | 982                                                  | 374                   | 160                         | 142                        | r                 |
| 0.02087                            | 0.00049                | 0.208                              | 0.014                  | 0.0722                                | 0.0089                 | 0.470          | 192                                               | 12                    | 133                                               | 3                     | 993                                                  | 250                   | 130                         | 114                        | r                 |
| 0.00669                            | 0.00035                | 0.069                              | 0.016                  | 0.074                                 | 0.025                  | *              | 67                                                | 15                    | 43                                                | 2                     | 1052                                                 | 673                   | 147                         | 106                        | r                 |

| $^{206}\text{Pb}^*/^{238}\text{U}$ | $\pm 2\sigma$<br>(abs) | $^{207}\text{Pb}^*/^{235}\text{U}$ | $\pm 2\sigma$<br>(abs) | $^{207}\text{Pb}^*/^{206}\text{Pb}^*$ | $\pm 2\sigma$<br>(abs) | corr.<br>coef. | $^{206}\text{Pb}^*/^{238}\text{U}$<br>age<br>(Ma) | $\pm 2\sigma$<br>(Ma) | $^{207}\text{Pb}^*/^{235}\text{U}$<br>age<br>(Ma) | $\pm 2\sigma$<br>(Ma) | $^{207}\text{Pb}^*/^{206}\text{Pb}^*$<br>age<br>(Ma) | $\pm 2\sigma$<br>(Ma) | Length<br>( $\mu\text{m}$ ) | Width<br>( $\mu\text{m}$ ) | Accept/<br>Reject |
|------------------------------------|------------------------|------------------------------------|------------------------|---------------------------------------|------------------------|----------------|---------------------------------------------------|-----------------------|---------------------------------------------------|-----------------------|------------------------------------------------------|-----------------------|-----------------------------|----------------------------|-------------------|
| 0.0192                             | 0.0010                 | 0.199                              | 0.032                  | 0.075                                 | 0.023                  | 0.405          | 184                                               | 27                    | 123                                               | 6                     | 1063                                                 | 607                   | 176                         | 115                        | r                 |
| 0.02701                            | 0.00062                | 0.281                              | 0.011                  | 0.0755                                | 0.0049                 | 0.650          | 251                                               | 9                     | 172                                               | 4                     | 1081                                                 | 130                   | 155                         | 100                        | r                 |
| 0.02221                            | 0.00049                | 0.231                              | 0.018                  | 0.075                                 | 0.011                  | 0.496          | 211                                               | 15                    | 142                                               | 3                     | 1081                                                 | 299                   | 158                         | 111                        | r                 |
| 0.0310                             | 0.0014                 | 0.323                              | 0.022                  | 0.0755                                | 0.0077                 | 0.721          | 284                                               | 17                    | 197                                               | 9                     | 1083                                                 | 205                   | 138                         | 90                         | r                 |
| 0.1436                             | 0.0040                 | 1.510                              | 0.043                  | 0.07629                               | 0.00094                | 0.900          | 935                                               | 18                    | 865                                               | 23                    | 1103                                                 | 25                    | 477                         | 169                        | a                 |
| 0.01897                            | 0.00048                | 0.200                              | 0.021                  | 0.077                                 | 0.015                  | 0.377          | 185                                               | 18                    | 121                                               | 3                     | 1109                                                 | 394                   | 163                         | 109                        | r                 |
| 0.1045                             | 0.0035                 | 1.134                              | 0.038                  | 0.0787                                | 0.0012                 | 0.850          | 770                                               | 18                    | 641                                               | 20                    | 1164                                                 | 30                    | 154                         | 88                         | a                 |
| 0.0199                             | 0.0022                 | 0.216                              | 0.057                  | 0.079                                 | 0.032                  | 0.538          | 199                                               | 48                    | 127                                               | 14                    | 1165                                                 | 814                   | 84                          | 84                         | r                 |
| 0.0362                             | 0.0013                 | 0.404                              | 0.045                  | 0.081                                 | 0.016                  | 0.714          | 345                                               | 33                    | 229                                               | 8                     | 1218                                                 | 396                   | 200                         | 150                        | r                 |
| 0.02044                            | 0.00051                | 0.229                              | 0.013                  | 0.0813                                | 0.0080                 | 0.475          | 209                                               | 11                    | 130                                               | 3                     | 1228                                                 | 194                   | 130                         | 100                        | r                 |
| 0.02642                            | 0.00061                | 0.297                              | 0.021                  | 0.081                                 | 0.011                  | 0.593          | 264                                               | 17                    | 168                                               | 4                     | 1233                                                 | 261                   | 131                         | 128                        | r                 |
| 0.02150                            | 0.00074                | 0.244                              | 0.033                  | 0.082                                 | 0.021                  | 0.460          | 222                                               | 27                    | 137                                               | 5                     | 1252                                                 | 505                   | 195                         | 130                        | r                 |
| 0.0399                             | 0.0014                 | 0.461                              | 0.034                  | 0.0837                                | 0.0077                 | 0.821          | 385                                               | 24                    | 252                                               | 9                     | 1287                                                 | 179                   | 162                         | 147                        | r                 |
| 0.0234                             | 0.0010                 | 0.272                              | 0.029                  | 0.084                                 | 0.012                  | 0.670          | 244                                               | 23                    | 149                                               | 7                     | 1295                                                 | 276                   | 256                         | 122                        | r                 |
| 0.1444                             | 0.0042                 | 1.679                              | 0.054                  | 0.0843                                | 0.0019                 | 0.808          | 1001                                              | 21                    | 870                                               | 24                    | 1300                                                 | 44                    | 248                         | 140                        | a                 |
| 0.00366                            | 0.00010                | 0.0429                             | 0.0037                 | 0.085                                 | 0.014                  | *              | 43                                                | 4                     | 24                                                | 1                     | 1317                                                 | 321                   | 245                         | 110                        | r                 |
| 0.0881                             | 0.0024                 | 1.034                              | 0.032                  | 0.0852                                | 0.0023                 | 0.509          | 721                                               | 16                    | 544                                               | 14                    | 1319                                                 | 53                    | 160                         | 115                        | r                 |
| 0.01714                            | 0.00062                | 0.202                              | 0.029                  | 0.086                                 | 0.023                  | 0.276          | 187                                               | 24                    | 110                                               | 4                     | 1330                                                 | 528                   | 200                         | 121                        | r                 |
| 0.0432                             | 0.0020                 | 0.518                              | 0.031                  | 0.0869                                | 0.0065                 | 0.837          | 424                                               | 21                    | 273                                               | 12                    | 1358                                                 | 143                   | 120                         | 97                         | r                 |
| 0.0448                             | 0.0024                 | 0.54                               | 0.15                   | 0.087                                 | 0.040                  | 0.788          | 437                                               | 99                    | 283                                               | 15                    | 1362                                                 | 893                   | 160                         | 118                        | r                 |
| 0.1930                             | 0.0073                 | 2.399                              | 0.092                  | 0.09014                               | 0.00090                | 0.948          | 1242                                              | 27                    | 1138                                              | 40                    | 1429                                                 | 19                    | 213                         | 76                         | a                 |
| 0.02398                            | 0.00060                | 0.304                              | 0.028                  | 0.092                                 | 0.016                  | 0.538          | 269                                               | 22                    | 153                                               | 4                     | 1463                                                 | 328                   | 160                         | 70                         | r                 |
| 0.02022                            | 0.00069                | 0.262                              | 0.027                  | 0.094                                 | 0.018                  | 0.430          | 237                                               | 22                    | 129                                               | 4                     | 1510                                                 | 368                   | 240                         | 162                        | r                 |
| 0.0243                             | 0.0014                 | 0.323                              | 0.023                  | 0.0964                                | 0.0077                 | 0.730          | 284                                               | 17                    | 155                                               | 9                     | 1555                                                 | 150                   | 146                         | 84                         | r                 |
| 0.0199                             | 0.0018                 | 0.269                              | 0.036                  | 0.098                                 | 0.020                  | 0.549          | 242                                               | 29                    | 127                                               | 11                    | 1588                                                 | 386                   | 220                         | 65                         | r                 |
| 0.1868                             | 0.0061                 | 2.637                              | 0.087                  | 0.10240                               | 0.00084                | 0.942          | 1311                                              | 24                    | 1104                                              | 33                    | 1668                                                 | 15                    | 277                         | 159                        | a                 |
| 0.02369                            | 0.00090                | 0.337                              | 0.031                  | 0.103                                 | 0.013                  | 0.673          | 295                                               | 23                    | 151                                               | 6                     | 1680                                                 | 226                   | 245                         | 164                        | r                 |
| 0.0490                             | 0.0063                 | 0.78                               | 0.52                   | 0.11                                  | 0.14                   | 0.785          | 583                                               | 296                   | 308                                               | 39                    | 1880                                                 | 2205                  | 92                          | 91                         | a                 |
| 0.0357                             | 0.0020                 | 0.575                              | 0.045                  | 0.117                                 | 0.013                  | 0.773          | 461                                               | 29                    | 226                                               | 12                    | 1909                                                 | 198                   | 113                         | 74                         | r                 |
| 0.0260                             | 0.0015                 | 0.419                              | 0.054                  | 0.117                                 | 0.026                  | 0.617          | 355                                               | 39                    | 165                                               | 9                     | 1909                                                 | 400                   | 245                         | 104                        | r                 |
| 0.0303                             | 0.0010                 | 0.494                              | 0.033                  | 0.118                                 | 0.013                  | 0.693          | 408                                               | 22                    | 192                                               | 7                     | 1929                                                 | 191                   | 210                         | 90                         | r                 |
| 0.0323                             | 0.0017                 | 0.551                              | 0.058                  | 0.124                                 | 0.022                  | 0.694          | 446                                               | 38                    | 205                                               | 11                    | 2009                                                 | 323                   | 158                         | 80                         | r                 |
| 0.0308                             | 0.0014                 | 0.559                              | 0.051                  | 0.132                                 | 0.020                  | 0.694          | 451                                               | 33                    | 196                                               | 9                     | 2119                                                 | 264                   | 146                         | 90                         | r                 |
| 0.0312                             | 0.0017                 | 0.580                              | 0.058                  | 0.135                                 | 0.022                  | 0.699          | 465                                               | 37                    | 198                                               | 11                    | 2164                                                 | 286                   | 148                         | 138                        | r                 |
| 0.02451                            | 0.00058                | 0.458                              | 0.021                  | 0.135                                 | 0.010                  | 0.606          | 383                                               | 15                    | 156                                               | 4                     | 2170                                                 | 134                   | 148                         | 95                         | r                 |
| 0.03159                            | 0.00075                | 0.605                              | 0.017                  | 0.1388                                | 0.0042                 | 0.808          | 480                                               | 11                    | 200                                               | 5                     | 2213                                                 | 52                    | 143                         | 133                        | r                 |
| 0.0203                             | 0.0015                 | 0.451                              | 0.070                  | 0.161                                 | 0.043                  | 0.486          | 378                                               | 49                    | 130                                               | 9                     | 2469                                                 | 453                   | 200                         | 150                        | r                 |
| 0.0244                             | 0.0014                 | 0.577                              | 0.097                  | 0.171                                 | 0.053                  | 0.558          | 463                                               | 63                    | 155                                               | 9                     | 2572                                                 | 517                   | 199                         | 103                        | r                 |
| 0.0421                             | 0.0018                 | 1.065                              | 0.069                  | 0.183                                 | 0.017                  | 0.803          | 737                                               | 34                    | 266                                               | 11                    | 2684                                                 | 155                   | 131                         | 104                        | r                 |
| 0.0516                             | 0.0069                 | 1.36                               | 0.46                   | 0.191                                 | 0.064                  | 0.888          | 872                                               | 197                   | 324                                               | 42                    | 2752                                                 | 552                   | 143                         | 105                        | r                 |
| 0.02509                            | 0.00068                | 0.685                              | 0.030                  | 0.198                                 | 0.014                  | 0.643          | 530                                               | 18                    | 160                                               | 4                     | 2811                                                 | 113                   | 153                         | 136                        | r                 |
| 0.0250                             | 0.0026                 | 0.78                               | 0.12                   | 0.225                                 | 0.038                  | 0.752          | 584                                               | 69                    | 159                                               | 17                    | 3017                                                 | 272                   | 304                         | 180                        | r                 |
| 0.0058                             | 0.0011                 | 0.200                              | 0.041                  | 0.251                                 | 0.050                  | *              | 185                                               | 34                    | 37                                                | 7                     | 3193                                                 | 314                   | 156                         | 62                         | r                 |
| 0.077                              | 0.010                  | 2.74                               | 0.77                   | 0.259                                 | 0.028                  | 0.971          | 1340                                              | 209                   | 477                                               | 62                    | 3239                                                 | 170                   | 163                         | 93                         | r                 |
| 0.0691                             | 0.0041                 | 2.66                               | 0.33                   | 0.280                                 | 0.023                  | 0.944          | 1318                                              | 91                    | 431                                               | 24                    | 3360                                                 | 127                   | 182                         | 82                         | r                 |
| 0.02406                            | 0.00088                | 0.929                              | 0.051                  | 0.280                                 | 0.022                  | 0.651          | 667                                               | 27                    | 153                                               | 6                     | 3364                                                 | 124                   | 232                         | 99                         | r                 |
| 0.0796                             | 0.0065                 | 3.36                               | 0.30                   | 0.306                                 | 0.022                  | 0.939          | 1495                                              | 69                    | 494                                               | 39                    | 3502                                                 | 113                   | 146                         | 118                        | r                 |
| 0.0278                             | 0.0036                 | 1.21                               | 0.18                   | 0.315                                 | 0.051                  | 0.776          | 804                                               | 82                    | 177                                               | 22                    | 3546                                                 | 248                   | 170                         | 80                         | r                 |
| 0.0383                             | 0.0020                 | 1.71                               | 0.11                   | 0.323                                 | 0.023                  | 0.835          | 1011                                              | 41                    | 243                                               | 12                    | 3584                                                 | 107                   | 133                         | 130                        | r                 |
| 0.00099                            | 0.00090                | 0.049                              | 0.046                  | 0.36                                  | 0.23                   | *              | 48                                                | 44                    | 6                                                 | 6                     | 3739                                                 | 999                   | 185                         | 54                         | r                 |
| 0.0500                             | 0.0040                 | 2.55                               | 0.39                   | 0.370                                 | 0.029                  | 0.939          | 1286                                              | 110                   | 315                                               | 25                    | 3789                                                 | 120                   | 171                         | 140                        | r                 |

| $^{206}\text{Pb}^*/^{238}\text{U}$                       | $\pm 2\sigma$<br>(abs) | $^{207}\text{Pb}^*/^{235}\text{U}$ | $\pm 2\sigma$<br>(abs) | $^{207}\text{Pb}^*/^{206}\text{Pb}^*$ | $\pm 2\sigma$<br>(abs) | corr.<br>coef. | $^{206}\text{Pb}^*/^{238}\text{U}$<br>age<br>(Ma) | $\pm 2\sigma$<br>(Ma) | $^{207}\text{Pb}^*/^{235}\text{U}$<br>age<br>(Ma) | $\pm 2\sigma$<br>(Ma) | $^{207}\text{Pb}^*/^{206}\text{Pb}^*$<br>age<br>(Ma) | $\pm 2\sigma$<br>(Ma) | Length<br>( $\mu\text{m}$ ) | Width<br>( $\mu\text{m}$ ) | Accept/<br>Reject |
|----------------------------------------------------------|------------------------|------------------------------------|------------------------|---------------------------------------|------------------------|----------------|---------------------------------------------------|-----------------------|---------------------------------------------------|-----------------------|------------------------------------------------------|-----------------------|-----------------------------|----------------------------|-------------------|
| <b>2. Amazon River, Colombia (4.1519° S, 69.9490° W)</b> |                        |                                    |                        |                                       |                        |                |                                                   |                       |                                                   |                       |                                                      |                       |                             |                            |                   |
| 0.01339                                                  | 0.00050                | 0.0008                             | 0.0075                 | 0.0004                                | 0.0079                 | *              | 1                                                 | 8                     | 86                                                | 3                     |                                                      |                       | 166                         | 85                         | r                 |
| 0.02235                                                  | 0.00051                | 0.007                              | 0.013                  | 0.0024                                | 0.0081                 | *              | 8                                                 | 13                    | 142                                               | 3                     |                                                      |                       | 245                         | 121                        | r                 |
| 0.1172                                                   | 0.0033                 | 0.079                              | 0.067                  | 0.0049                                | 0.0065                 | 0.861          | 77                                                | 63                    | 714                                               | 19                    |                                                      |                       | 140                         | 130                        | r                 |
| 0.03942                                                  | 0.00097                | 0.044                              | 0.012                  | 0.0081                                | 0.0042                 | 0.635          | 44                                                | 12                    | 249                                               | 6                     |                                                      |                       | 241                         | 133                        | r                 |
| 0.0454                                                   | 0.0011                 | 0.070                              | 0.011                  | 0.0111                                | 0.0031                 | 0.725          | 68                                                | 10                    | 286                                               | 7                     |                                                      |                       | 146                         | 113                        | r                 |
| 0.01987                                                  | 0.00090                | 0.0663                             | 0.0094                 | 0.0242                                | 0.0064                 | 0.404          | 65                                                | 9                     | 127                                               | 6                     |                                                      |                       | 185                         | 106                        | r                 |
| 0.02240                                                  | 0.00052                | 0.0764                             | 0.0085                 | 0.0247                                | 0.0052                 | 0.472          | 75                                                | 8                     | 143                                               | 3                     |                                                      |                       | 167                         | 116                        | r                 |
| 0.0545                                                   | 0.0016                 | 0.2226                             | 0.0088                 | 0.0296                                | 0.0015                 | 0.462          | 204                                               | 7                     | 342                                               | 10                    |                                                      |                       | 150                         | 75                         | r                 |
| 0.01268                                                  | 0.00082                | 0.050                              | 0.032                  | 0.029                                 | 0.036                  | *              | 50                                                | 30                    | 81                                                | 5                     |                                                      |                       | 130                         | 110                        | r                 |
| 0.0867                                                   | 0.0029                 | 0.421                              | 0.025                  | 0.0352                                | 0.0030                 | 0.902          | 357                                               | 18                    | 536                                               | 17                    |                                                      |                       | 157                         | 115                        | r                 |
| 0.1496                                                   | 0.0043                 | 0.805                              | 0.037                  | 0.0390                                | 0.0021                 | 0.784          | 600                                               | 21                    | 899                                               | 24                    |                                                      |                       | 141                         | 91                         | r                 |
| 0.0637                                                   | 0.0030                 | 0.316                              | 0.019                  | 0.0359                                | 0.0028                 | 0.483          | 278                                               | 15                    | 398                                               | 18                    |                                                      |                       | 248                         | 87                         | r                 |
| 0.04003                                                  | 0.00091                | 0.1906                             | 0.0056                 | 0.0345                                | 0.0013                 | 0.817          | 177                                               | 5                     | 253                                               | 6                     |                                                      |                       | 230                         | 110                        | a                 |
| 0.0490                                                   | 0.0015                 | 0.237                              | 0.010                  | 0.0351                                | 0.0021                 | 0.838          | 216                                               | 8                     | 309                                               | 9                     |                                                      |                       | 130                         | 103                        | a                 |
| 0.0504                                                   | 0.0016                 | 0.252                              | 0.022                  | 0.0362                                | 0.0056                 | 0.801          | 228                                               | 18                    | 317                                               | 10                    |                                                      |                       | 253                         | 97                         | a                 |
| 0.0522                                                   | 0.0015                 | 0.304                              | 0.016                  | 0.0422                                | 0.0035                 | 0.826          | 270                                               | 13                    | 328                                               | 9                     |                                                      |                       | 137                         | 106                        | a                 |
| 0.1551                                                   | 0.0055                 | 1.137                              | 0.049                  | 0.0532                                | 0.0019                 | 0.848          | 771                                               | 23                    | 929                                               | 31                    | 335                                                  | 81                    | 143                         | 112                        | a                 |
| 0.1320                                                   | 0.0036                 | 0.989                              | 0.046                  | 0.0543                                | 0.0031                 | 0.588          | 698                                               | 23                    | 799                                               | 21                    | 384                                                  | 128                   | 111                         | 107                        | a                 |
| 0.0432                                                   | 0.0011                 | 0.2647                             | 0.0072                 | 0.0445                                | 0.0011                 | 0.876          | 238                                               | 6                     | 272                                               | 6                     |                                                      |                       | 148                         | 130                        | a                 |
| 0.02429                                                  | 0.00052                | 0.1455                             | 0.0035                 | 0.0434                                | 0.0010                 | 0.769          | 138                                               | 3                     | 155                                               | 3                     |                                                      |                       | 187                         | 99                         | a                 |
| 0.1396                                                   | 0.0075                 | 1.13                               | 0.22                   | 0.059                                 | 0.017                  | 0.938          | 768                                               | 106                   | 842                                               | 43                    | 559                                                  | 630                   | 145                         | 78                         | a                 |
| 0.0959                                                   | 0.0027                 | 0.707                              | 0.020                  | 0.05350                               | 0.00053                | 0.912          | 543                                               | 12                    | 590                                               | 16                    | 350                                                  | 23                    | 171                         | 99                         | a                 |
| 0.0418                                                   | 0.0010                 | 0.2706                             | 0.0066                 | 0.04694                               | 0.00054                | 0.748          | 243                                               | 5                     | 264                                               | 6                     | 46                                                   | 28                    | 104                         | 87                         | a                 |
| 0.1602                                                   | 0.0050                 | 1.411                              | 0.047                  | 0.0639                                | 0.0012                 | 0.894          | 894                                               | 20                    | 958                                               | 28                    | 737                                                  | 40                    | 210                         | 81                         | a                 |
| 0.0085                                                   | 0.0027                 | 0.05                               | 0.13                   | 0.04                                  | 0.22                   | *              | 51                                                | 126                   | 55                                                | 17                    |                                                      |                       | 185                         | 102                        | a                 |
| 0.1618                                                   | 0.0061                 | 1.470                              | 0.058                  | 0.0659                                | 0.0012                 | 0.914          | 918                                               | 24                    | 967                                               | 34                    | 803                                                  | 39                    | 140                         | 90                         | a                 |
| 0.00672                                                  | 0.00027                | 0.0424                             | 0.0090                 | 0.046                                 | 0.019                  | *              | 42                                                | 9                     | 43                                                | 2                     | -15                                                  | 1003                  | 180                         | 80                         | a                 |
| 0.0503                                                   | 0.0011                 | 0.3574                             | 0.0090                 | 0.0516                                | 0.0011                 | 0.492          | 310                                               | 7                     | 316                                               | 7                     | 266                                                  | 49                    | 275                         | 105                        | a                 |
| 0.1592                                                   | 0.0069                 | 1.577                              | 0.070                  | 0.0718                                | 0.0014                 | 0.911          | 961                                               | 28                    | 952                                               | 38                    | 981                                                  | 40                    | 240                         | 100                        | a                 |
| 0.1076                                                   | 0.0045                 | 0.925                              | 0.039                  | 0.06235                               | 0.00056                | 0.946          | 665                                               | 21                    | 659                                               | 26                    | 686                                                  | 19                    | 110                         | 85                         | a                 |
| 0.186                                                    | 0.019                  | 1.99                               | 0.22                   | 0.0776                                | 0.0045                 | 0.898          | 1112                                              | 74                    | 1099                                              | 102                   | 1137                                                 | 115                   | 127                         | 120                        | a                 |
| 0.0739                                                   | 0.0018                 | 0.583                              | 0.014                  | 0.05723                               | 0.00040                | 0.901          | 466                                               | 9                     | 459                                               | 11                    | 500                                                  | 16                    | 111                         | 94                         | a                 |
| 0.1710                                                   | 0.0057                 | 1.771                              | 0.060                  | 0.07514                               | 0.00050                | 0.962          | 1035                                              | 22                    | 1018                                              | 32                    | 1072                                                 | 13                    | 124                         | 109                        | a                 |
| 0.1502                                                   | 0.0053                 | 1.502                              | 0.060                  | 0.0725                                | 0.0021                 | 0.830          | 931                                               | 24                    | 902                                               | 29                    | 1000                                                 | 58                    | 120                         | 108                        | a                 |
| 0.1255                                                   | 0.0051                 | 1.175                              | 0.052                  | 0.0679                                | 0.0020                 | 0.826          | 789                                               | 24                    | 762                                               | 29                    | 866                                                  | 62                    | 201                         | 86                         | a                 |
| 0.1818                                                   | 0.0066                 | 2.004                              | 0.074                  | 0.07996                               | 0.00069                | 0.955          | 1117                                              | 25                    | 1077                                              | 36                    | 1196                                                 | 17                    | 167                         | 110                        | a                 |
| 0.0570                                                   | 0.0015                 | 0.441                              | 0.011                  | 0.05614                               | 0.00024                | 0.928          | 371                                               | 8                     | 357                                               | 9                     | 458                                                  | 9                     | 185                         | 70                         | a                 |
| 0.126                                                    | 0.013                  | 1.19                               | 0.13                   | 0.0685                                | 0.0061                 | 0.787          | 795                                               | 61                    | 764                                               | 72                    | 882                                                  | 184                   | 203                         | 86                         | a                 |
| 0.00544                                                  | 0.00014                | 0.0366                             | 0.0032                 | 0.0488                                | 0.0083                 | *              | 36                                                | 3                     | 35                                                | 1                     | 138                                                  | 399                   | 199                         | 70                         | a                 |
| 0.0396                                                   | 0.0011                 | 0.295                              | 0.012                  | 0.0539                                | 0.0033                 | 0.783          | 262                                               | 9                     | 251                                               | 7                     | 369                                                  | 138                   | 135                         | 80                         | a                 |
| 0.1614                                                   | 0.0057                 | 1.704                              | 0.060                  | 0.07657                               | 0.00036                | 0.972          | 1010                                              | 22                    | 965                                               | 31                    | 1110                                                 | 10                    | 152                         | 105                        | a                 |
| 0.1562                                                   | 0.0061                 | 1.628                              | 0.063                  | 0.07558                               | 0.00041                | 0.971          | 981                                               | 25                    | 935                                               | 34                    | 1084                                                 | 11                    | 250                         | 64                         | a                 |
| 0.0977                                                   | 0.0026                 | 0.863                              | 0.023                  | 0.06403                               | 0.00091                | 0.846          | 632                                               | 13                    | 601                                               | 15                    | 743                                                  | 30                    | 150                         | 75                         | a                 |
| 0.1608                                                   | 0.0049                 | 1.710                              | 0.052                  | 0.07714                               | 0.00032                | 0.972          | 1012                                              | 19                    | 961                                               | 27                    | 1125                                                 | 8                     | 224                         | 89                         | a                 |
| 0.0470                                                   | 0.0011                 | 0.3603                             | 0.0088                 | 0.05562                               | 0.00093                | 0.568          | 312                                               | 7                     | 296                                               | 7                     | 437                                                  | 37                    | 131                         | 75                         | a                 |
| 0.0775                                                   | 0.0021                 | 0.650                              | 0.020                  | 0.0608                                | 0.0017                 | 0.607          | 508                                               | 12                    | 481                                               | 12                    | 633                                                  | 59                    | 110                         | 72                         | a                 |
| 0.0668                                                   | 0.0016                 | 0.543                              | 0.014                  | 0.0590                                | 0.0010                 | 0.691          | 441                                               | 9                     | 417                                               | 9                     | 566                                                  | 38                    | 106                         | 92                         | a                 |
| 0.0717                                                   | 0.0019                 | 0.594                              | 0.016                  | 0.06006                               | 0.00054                | 0.875          | 473                                               | 10                    | 446                                               | 11                    | 606                                                  | 19                    | 171                         | 93                         | a                 |
| 0.1684                                                   | 0.0073                 | 1.853                              | 0.080                  | 0.07978                               | 0.00056                | 0.967          | 1064                                              | 28                    | 1004                                              | 40                    | 1191                                                 | 14                    | 180                         | 55                         | a                 |
| 0.0810                                                   | 0.0021                 | 0.692                              | 0.019                  | 0.0620                                | 0.0012                 | 0.740          | 534                                               | 12                    | 502                                               | 13                    | 674                                                  | 42                    | 130                         | 104                        | a                 |

| $^{206}\text{Pb}^*/^{238}\text{U}$ | $\pm 2\sigma$<br>(abs) | $^{207}\text{Pb}^*/^{235}\text{U}$ | $\pm 2\sigma$<br>(abs) | $^{207}\text{Pb}^*/^{206}\text{Pb}^*$ | $\pm 2\sigma$<br>(abs) | corr.<br>coef. | $^{206}\text{Pb}^*/^{238}\text{U}$<br>age<br>(Ma) | $\pm 2\sigma$<br>(Ma) | $^{207}\text{Pb}^*/^{235}\text{U}$<br>age<br>(Ma) | $\pm 2\sigma$<br>(Ma) | $^{207}\text{Pb}^*/^{206}\text{Pb}^*$<br>age<br>(Ma) | $\pm 2\sigma$<br>(Ma) | Length<br>( $\mu\text{m}$ ) | Width<br>( $\mu\text{m}$ ) | Accept/<br>Reject |
|------------------------------------|------------------------|------------------------------------|------------------------|---------------------------------------|------------------------|----------------|---------------------------------------------------|-----------------------|---------------------------------------------------|-----------------------|------------------------------------------------------|-----------------------|-----------------------------|----------------------------|-------------------|
| 0.0927                             | 0.0028                 | 0.821                              | 0.025                  | 0.06422                               | 0.00080                | 0.873          | 608                                               | 14                    | 571                                               | 16                    | 749                                                  | 26                    | 140                         | 90                         | a                 |
| 0.1585                             | 0.0065                 | 1.708                              | 0.072                  | 0.0782                                | 0.0014                 | 0.911          | 1012                                              | 27                    | 948                                               | 36                    | 1151                                                 | 34                    | 90                          | 75                         | a                 |
| 0.03779                            | 0.00087                | 0.2863                             | 0.0069                 | 0.05495                               | 0.00082                | 0.510          | 256                                               | 5                     | 239                                               | 5                     | 410                                                  | 33                    | 206                         | 123                        | a                 |
| 0.04092                            | 0.00096                | 0.3146                             | 0.0098                 | 0.0558                                | 0.0022                 | 0.824          | 278                                               | 8                     | 259                                               | 6                     | 443                                                  | 87                    | 170                         | 80                         | a                 |
| 0.1436                             | 0.0040                 | 1.510                              | 0.043                  | 0.07629                               | 0.00094                | 0.900          | 935                                               | 18                    | 865                                               | 23                    | 1103                                                 | 25                    | 172                         | 140                        | a                 |
| 0.0674                             | 0.0033                 | 0.566                              | 0.029                  | 0.0609                                | 0.0013                 | 0.823          | 456                                               | 19                    | 420                                               | 20                    | 637                                                  | 47                    | 140                         | 65                         | a                 |
| 0.0935                             | 0.0027                 | 0.851                              | 0.054                  | 0.0660                                | 0.0065                 | 0.904          | 625                                               | 30                    | 576                                               | 16                    | 807                                                  | 205                   | 126                         | 44                         | a                 |
| 0.1441                             | 0.0043                 | 1.533                              | 0.046                  | 0.07715                               | 0.00038                | 0.961          | 944                                               | 18                    | 868                                               | 24                    | 1125                                                 | 10                    | 178                         | 100                        | a                 |
| 0.1045                             | 0.0029                 | 0.990                              | 0.027                  | 0.06871                               | 0.00028                | 0.958          | 699                                               | 14                    | 641                                               | 17                    | 890                                                  | 8                     | 153                         | 83                         | a                 |
| 0.02249                            | 0.00050                | 0.1667                             | 0.0049                 | 0.0538                                | 0.0020                 | 0.667          | 157                                               | 4                     | 143                                               | 3                     | 361                                                  | 86                    | 142                         | 80                         | a                 |
| 0.1186                             | 0.0032                 | 1.176                              | 0.032                  | 0.07190                               | 0.00071                | 0.904          | 789                                               | 15                    | 723                                               | 18                    | 983                                                  | 20                    | 80                          | 76                         | a                 |
| 0.0855                             | 0.0021                 | 0.769                              | 0.020                  | 0.0653                                | 0.0011                 | 0.771          | 579                                               | 12                    | 529                                               | 13                    | 783                                                  | 35                    | 112                         | 76                         | a                 |
| 0.165                              | 0.011                  | 1.89                               | 0.13                   | 0.08320                               | 0.00097                | 0.963          | 1078                                              | 45                    | 983                                               | 61                    | 1274                                                 | 23                    | 100                         | 55                         | a                 |
| 0.1639                             | 0.0052                 | 1.881                              | 0.063                  | 0.0833                                | 0.0012                 | 0.905          | 1075                                              | 22                    | 978                                               | 29                    | 1275                                                 | 28                    | 110                         | 80                         | a                 |
| 0.1029                             | 0.0071                 | 0.980                              | 0.078                  | 0.0691                                | 0.0047                 | 0.698          | 694                                               | 40                    | 631                                               | 41                    | 902                                                  | 140                   | 105                         | 99                         | a                 |
| 0.1403                             | 0.0058                 | 1.500                              | 0.062                  | 0.07754                               | 0.00063                | 0.953          | 931                                               | 25                    | 847                                               | 33                    | 1135                                                 | 16                    | 217                         | 76                         | a                 |
| 0.0421                             | 0.0010                 | 0.3338                             | 0.0089                 | 0.0575                                | 0.0014                 | 0.872          | 292                                               | 7                     | 266                                               | 6                     | 509                                                  | 55                    | 230                         | 130                        | a                 |
| 0.1313                             | 0.0036                 | 1.367                              | 0.039                  | 0.0755                                | 0.0010                 | 0.882          | 875                                               | 17                    | 795                                               | 21                    | 1082                                                 | 26                    | 120                         | 82                         | a                 |
| 0.1428                             | 0.0044                 | 1.543                              | 0.049                  | 0.07834                               | 0.00097                | 0.906          | 948                                               | 19                    | 861                                               | 25                    | 1156                                                 | 24                    | 190                         | 75                         | a                 |
| 0.1259                             | 0.0055                 | 1.291                              | 0.056                  | 0.07439                               | 0.00094                | 0.926          | 842                                               | 25                    | 764                                               | 31                    | 1052                                                 | 25                    | 161                         | 99                         | a                 |
| 0.1477                             | 0.0060                 | 1.623                              | 0.071                  | 0.0797                                | 0.0023                 | 0.833          | 979                                               | 27                    | 888                                               | 33                    | 1189                                                 | 58                    | 140                         | 87                         | a                 |
| 0.1354                             | 0.0037                 | 1.434                              | 0.040                  | 0.07683                               | 0.00065                | 0.926          | 903                                               | 17                    | 819                                               | 21                    | 1117                                                 | 17                    | 122                         | 50                         | a                 |
| 0.1439                             | 0.0056                 | 1.566                              | 0.065                  | 0.0789                                | 0.0022                 | 0.828          | 957                                               | 26                    | 867                                               | 31                    | 1171                                                 | 56                    | 190                         | 121                        | a                 |
| 0.02798                            | 0.00065                | 0.2136                             | 0.0068                 | 0.0554                                | 0.0024                 | 0.724          | 197                                               | 6                     | 178                                               | 4                     | 427                                                  | 95                    | 160                         | 85                         | a                 |
| 0.0992                             | 0.0029                 | 0.943                              | 0.030                  | 0.0690                                | 0.0015                 | 0.767          | 675                                               | 16                    | 610                                               | 17                    | 898                                                  | 46                    | 120                         | 65                         | a                 |
| 0.1466                             | 0.0079                 | 1.617                              | 0.087                  | 0.07999                               | 0.00037                | 0.980          | 977                                               | 34                    | 882                                               | 44                    | 1197                                                 | 9                     | 118                         | 105                        | a                 |
| 0.1584                             | 0.0047                 | 1.814                              | 0.055                  | 0.08302                               | 0.00048                | 0.957          | 1050                                              | 20                    | 948                                               | 26                    | 1270                                                 | 11                    | 155                         | 115                        | a                 |
| 0.1381                             | 0.0041                 | 1.485                              | 0.045                  | 0.07799                               | 0.00087                | 0.909          | 924                                               | 18                    | 834                                               | 23                    | 1147                                                 | 22                    | 156                         | 113                        | a                 |
| 0.1274                             | 0.0038                 | 1.326                              | 0.042                  | 0.0755                                | 0.0013                 | 0.858          | 857                                               | 18                    | 773                                               | 22                    | 1081                                                 | 34                    | 150                         | 85                         | a                 |
| 0.1365                             | 0.0064                 | 1.461                              | 0.069                  | 0.07766                               | 0.00050                | 0.966          | 915                                               | 28                    | 825                                               | 36                    | 1138                                                 | 13                    | 120                         | 58                         | a                 |
| 0.0949                             | 0.0025                 | 0.894                              | 0.025                  | 0.0684                                | 0.0010                 | 0.819          | 649                                               | 13                    | 584                                               | 15                    | 880                                                  | 32                    | 155                         | 65                         | a                 |
| 0.00943                            | 0.00041                | 0.068                              | 0.010                  | 0.053                                 | 0.015                  | *              | 67                                                | 10                    | 61                                                | 3                     | 314                                                  | 661                   | 207                         | 68                         | a                 |
| 0.0513                             | 0.0013                 | 0.424                              | 0.011                  | 0.05990                               | 0.00052                | 0.818          | 359                                               | 8                     | 323                                               | 8                     | 600                                                  | 19                    | 144                         | 115                        | a                 |
| 0.1514                             | 0.0045                 | 1.711                              | 0.051                  | 0.08193                               | 0.00032                | 0.969          | 1013                                              | 19                    | 909                                               | 25                    | 1244                                                 | 8                     | 110                         | 105                        | a                 |
| 0.1219                             | 0.0033                 | 1.257                              | 0.044                  | 0.0748                                | 0.0027                 | 0.604          | 827                                               | 20                    | 742                                               | 19                    | 1063                                                 | 73                    | 74                          | 43                         | a                 |
| 0.0787                             | 0.0021                 | 0.710                              | 0.022                  | 0.0655                                | 0.0018                 | 0.584          | 545                                               | 13                    | 488                                               | 13                    | 789                                                  | 59                    | 85                          | 80                         | a                 |
| 0.1406                             | 0.0064                 | 1.540                              | 0.071                  | 0.0794                                | 0.0014                 | 0.906          | 947                                               | 28                    | 848                                               | 36                    | 1183                                                 | 35                    | 130                         | 75                         | a                 |
| 0.0450                             | 0.0022                 | 0.366                              | 0.020                  | 0.0591                                | 0.0028                 | 0.884          | 317                                               | 15                    | 284                                               | 14                    | 570                                                  | 105                   | 236                         | 63                         | a                 |
| 0.0769                             | 0.0024                 | 0.693                              | 0.026                  | 0.0654                                | 0.0026                 | 0.921          | 535                                               | 16                    | 477                                               | 14                    | 787                                                  | 82                    | 166                         | 60                         | a                 |
| 0.1487                             | 0.0047                 | 1.683                              | 0.062                  | 0.0821                                | 0.0024                 | 0.778          | 1002                                              | 23                    | 894                                               | 26                    | 1247                                                 | 57                    | 180                         | 72                         | a                 |
| 0.1420                             | 0.0041                 | 1.587                              | 0.046                  | 0.08106                               | 0.00054                | 0.944          | 965                                               | 18                    | 856                                               | 23                    | 1223                                                 | 13                    | 148                         | 79                         | a                 |
| 0.1382                             | 0.0041                 | 1.536                              | 0.046                  | 0.08062                               | 0.00022                | 0.977          | 945                                               | 18                    | 834                                               | 23                    | 1212                                                 | 5                     | 130                         | 72                         | a                 |
| 0.1363                             | 0.0038                 | 1.507                              | 0.044                  | 0.0802                                | 0.0012                 | 0.864          | 933                                               | 18                    | 824                                               | 22                    | 1201                                                 | 30                    | 150                         | 125                        | a                 |
| 0.1269                             | 0.0034                 | 1.362                              | 0.041                  | 0.0778                                | 0.0017                 | 0.784          | 873                                               | 18                    | 770                                               | 20                    | 1142                                                 | 44                    | 170                         | 85                         | a                 |
| 0.1387                             | 0.0038                 | 1.547                              | 0.043                  | 0.08090                               | 0.00037                | 0.958          | 949                                               | 17                    | 837                                               | 22                    | 1219                                                 | 9                     | 121                         | 66                         | a                 |
| 0.1417                             | 0.0045                 | 1.600                              | 0.051                  | 0.08187                               | 0.00065                | 0.938          | 970                                               | 20                    | 854                                               | 25                    | 1242                                                 | 16                    | 133                         | 120                        | a                 |
| 0.1663                             | 0.0096                 | 2.04                               | 0.12                   | 0.0889                                | 0.0013                 | 0.942          | 1129                                              | 40                    | 992                                               | 53                    | 1403                                                 | 28                    | 100                         | 67                         | a                 |
| 0.1354                             | 0.0042                 | 1.505                              | 0.047                  | 0.08063                               | 0.00029                | 0.971          | 933                                               | 19                    | 819                                               | 24                    | 1213                                                 | 7                     | 106                         | 99                         | a                 |
| 0.1469                             | 0.0042                 | 1.696                              | 0.060                  | 0.0837                                | 0.0027                 | 0.718          | 1007                                              | 23                    | 884                                               | 24                    | 1287                                                 | 62                    | 203                         | 58                         | a                 |
| 0.1175                             | 0.0037                 | 1.237                              | 0.069                  | 0.0763                                | 0.0057                 | 0.933          | 817                                               | 31                    | 716                                               | 22                    | 1104                                                 | 150                   | 140                         | 105                        | a                 |
| 0.1347                             | 0.0050                 | 1.499                              | 0.060                  | 0.0807                                | 0.0019                 | 0.836          | 930                                               | 25                    | 815                                               | 29                    | 1215                                                 | 47                    | 144                         | 128                        | a                 |

| $^{206}\text{Pb}^*/^{238}\text{U}$ | $\pm 2\sigma$<br>(abs) | $^{207}\text{Pb}^*/^{235}\text{U}$ | $\pm 2\sigma$<br>(abs) | $^{207}\text{Pb}^*/^{206}\text{Pb}^*$ | $\pm 2\sigma$<br>(abs) | corr.<br>coef. | $^{206}\text{Pb}^*/^{238}\text{U}$<br>age<br>(Ma) | $\pm 2\sigma$<br>(Ma) | $^{207}\text{Pb}^*/^{235}\text{U}$<br>age<br>(Ma) | $\pm 2\sigma$<br>(Ma) | $^{207}\text{Pb}^*/^{206}\text{Pb}^*$<br>age<br>(Ma) | $\pm 2\sigma$<br>(Ma) | Length<br>( $\mu\text{m}$ ) | Width<br>( $\mu\text{m}$ ) | Accept/<br>Reject |
|------------------------------------|------------------------|------------------------------------|------------------------|---------------------------------------|------------------------|----------------|---------------------------------------------------|-----------------------|---------------------------------------------------|-----------------------|------------------------------------------------------|-----------------------|-----------------------------|----------------------------|-------------------|
| 0.0916                             | 0.0024                 | 0.889                              | 0.025                  | 0.0703                                | 0.0014                 | 0.746          | 646                                               | 13                    | 565                                               | 14                    | 938                                                  | 40                    | 210                         | 100                        | a                 |
| 0.1201                             | 0.0042                 | 1.277                              | 0.047                  | 0.0771                                | 0.0017                 | 0.827          | 836                                               | 21                    | 731                                               | 24                    | 1124                                                 | 44                    | 98                          | 98                         | a                 |
| 0.02681                            | 0.00061                | 0.2117                             | 0.0060                 | 0.0573                                | 0.0019                 | 0.745          | 195                                               | 5                     | 171                                               | 4                     | 501                                                  | 74                    | 127                         | 83                         | a                 |
| 0.1278                             | 0.0036                 | 1.396                              | 0.043                  | 0.0792                                | 0.0016                 | 0.809          | 887                                               | 18                    | 775                                               | 21                    | 1178                                                 | 40                    | 217                         | 126                        | a                 |
| 0.1405                             | 0.0041                 | 1.599                              | 0.047                  | 0.08258                               | 0.00050                | 0.948          | 970                                               | 18                    | 847                                               | 23                    | 1259                                                 | 12                    | 130                         | 70                         | a                 |
| 0.265                              | 0.011                  | 4.52                               | 0.18                   | 0.12377                               | 0.00088                | 0.966          | 1734                                              | 34                    | 1514                                              | 54                    | 2011                                                 | 13                    | 130                         | 65                         | a                 |
| 0.1406                             | 0.0041                 | 1.609                              | 0.047                  | 0.08295                               | 0.00036                | 0.962          | 974                                               | 18                    | 848                                               | 23                    | 1268                                                 | 9                     | 140                         | 100                        | a                 |
| 0.1392                             | 0.0039                 | 1.588                              | 0.050                  | 0.0827                                | 0.0018                 | 0.799          | 966                                               | 20                    | 840                                               | 22                    | 1263                                                 | 44                    | 160                         | 100                        | a                 |
| 0.1356                             | 0.0053                 | 1.534                              | 0.068                  | 0.0820                                | 0.0027                 | 0.775          | 944                                               | 27                    | 820                                               | 30                    | 1246                                                 | 65                    | 140                         | 93                         | a                 |
| 0.1510                             | 0.0044                 | 1.801                              | 0.053                  | 0.08650                               | 0.00062                | 0.941          | 1046                                              | 19                    | 906                                               | 25                    | 1349                                                 | 14                    | 112                         | 89                         | a                 |
| 0.1496                             | 0.0050                 | 1.781                              | 0.059                  | 0.08634                               | 0.00066                | 0.943          | 1039                                              | 22                    | 899                                               | 28                    | 1346                                                 | 15                    | 153                         | 89                         | a                 |
| 0.1489                             | 0.0045                 | 1.779                              | 0.054                  | 0.08663                               | 0.00031                | 0.970          | 1038                                              | 20                    | 895                                               | 25                    | 1352                                                 | 7                     | 125                         | 122                        | a                 |
| 0.1325                             | 0.0036                 | 1.503                              | 0.045                  | 0.0823                                | 0.0016                 | 0.812          | 932                                               | 18                    | 802                                               | 21                    | 1253                                                 | 38                    | 170                         | 120                        | a                 |
| 0.1457                             | 0.0043                 | 1.729                              | 0.052                  | 0.08605                               | 0.00087                | 0.914          | 1019                                              | 19                    | 877                                               | 24                    | 1339                                                 | 20                    | 150                         | 90                         | a                 |
| 0.1090                             | 0.0047                 | 1.145                              | 0.051                  | 0.0762                                | 0.0014                 | 0.871          | 775                                               | 24                    | 667                                               | 27                    | 1101                                                 | 38                    | 152                         | 70                         | a                 |
| 0.1285                             | 0.0037                 | 1.440                              | 0.043                  | 0.0813                                | 0.0010                 | 0.886          | 906                                               | 18                    | 779                                               | 21                    | 1229                                                 | 24                    | 115                         | 94                         | a                 |
| 0.1295                             | 0.0036                 | 1.461                              | 0.041                  | 0.08186                               | 0.00053                | 0.938          | 915                                               | 17                    | 785                                               | 21                    | 1242                                                 | 13                    | 132                         | 85                         | a                 |
| 0.1533                             | 0.0058                 | 1.881                              | 0.074                  | 0.0890                                | 0.0018                 | 0.869          | 1074                                              | 26                    | 920                                               | 32                    | 1404                                                 | 38                    | 165                         | 85                         | a                 |
| 0.1499                             | 0.0045                 | 1.833                              | 0.059                  | 0.0886                                | 0.0016                 | 0.850          | 1057                                              | 21                    | 901                                               | 25                    | 1396                                                 | 35                    | 130                         | 98                         | a                 |
| 0.0865                             | 0.0023                 | 0.863                              | 0.037                  | 0.0724                                | 0.0043                 | 0.905          | 632                                               | 20                    | 535                                               | 14                    | 997                                                  | 122                   | 175                         | 105                        | a                 |
| 0.0508                             | 0.0013                 | 0.451                              | 0.017                  | 0.0644                                | 0.0032                 | 0.846          | 378                                               | 12                    | 320                                               | 8                     | 755                                                  | 106                   | 170                         | 91                         | a                 |
| 0.1868                             | 0.0061                 | 2.637                              | 0.087                  | 0.10240                               | 0.00084                | 0.942          | 1311                                              | 24                    | 1104                                              | 33                    | 1668                                                 | 15                    | 217                         | 192                        | a                 |
| 0.0695                             | 0.0037                 | 0.660                              | 0.037                  | 0.0689                                | 0.0029                 | 0.618          | 515                                               | 23                    | 433                                               | 22                    | 897                                                  | 88                    | 135                         | 65                         | a                 |
| 0.1946                             | 0.0064                 | 2.851                              | 0.097                  | 0.1062                                | 0.0013                 | 0.915          | 1369                                              | 25                    | 1146                                              | 34                    | 1736                                                 | 23                    | 105                         | 85                         | a                 |
| 0.0639                             | 0.0023                 | 0.600                              | 0.035                  | 0.0681                                | 0.0055                 | 0.873          | 477                                               | 22                    | 399                                               | 14                    | 872                                                  | 167                   | 142                         | 108                        | a                 |
| 0.1230                             | 0.0036                 | 1.413                              | 0.057                  | 0.0833                                | 0.0038                 | 0.946          | 895                                               | 24                    | 748                                               | 21                    | 1277                                                 | 89                    | 175                         | 100                        | a                 |
| 0.0911                             | 0.0029                 | 0.942                              | 0.030                  | 0.07501                               | 0.00080                | 0.882          | 674                                               | 16                    | 562                                               | 17                    | 1069                                                 | 22                    | 88                          | 82                         | a                 |
| 0.1713                             | 0.0072                 | 2.361                              | 0.100                  | 0.09997                               | 0.00091                | 0.947          | 1231                                              | 30                    | 1019                                              | 40                    | 1623                                                 | 17                    | 98                          | 92                         | a                 |
| 0.02805                            | 0.00065                | 0.2393                             | 0.0092                 | 0.0619                                | 0.0038                 | 0.674          | 218                                               | 8                     | 178                                               | 4                     | 670                                                  | 130                   | 155                         | 110                        | a                 |
| 0.0494                             | 0.0031                 | 0.455                              | 0.035                  | 0.0667                                | 0.0062                 | 0.860          | 381                                               | 24                    | 311                                               | 19                    | 828                                                  | 192                   | 263                         | 73                         | a                 |
| 0.1572                             | 0.0054                 | 2.122                              | 0.078                  | 0.0979                                | 0.0019                 | 0.855          | 1156                                              | 25                    | 941                                               | 30                    | 1584                                                 | 36                    | 115                         | 43                         | a                 |
| 0.1730                             | 0.0069                 | 2.47                               | 0.10                   | 0.1036                                | 0.0010                 | 0.939          | 1263                                              | 29                    | 1029                                              | 38                    | 1689                                                 | 18                    | 77                          | 72                         | a                 |
| 0.0419                             | 0.0025                 | 0.378                              | 0.055                  | 0.065                                 | 0.017                  | 0.757          | 326                                               | 40                    | 265                                               | 16                    | 787                                                  | 540                   | 192                         | 115                        | a                 |
| 0.1144                             | 0.0067                 | 1.343                              | 0.081                  | 0.0852                                | 0.0023                 | 0.854          | 864                                               | 35                    | 698                                               | 39                    | 1319                                                 | 52                    | 185                         | 83                         | a                 |
| 0.1540                             | 0.0068                 | 2.115                              | 0.096                  | 0.0996                                | 0.0016                 | 0.899          | 1154                                              | 31                    | 924                                               | 38                    | 1617                                                 | 31                    | 109                         | 61                         | a                 |
| 0.1203                             | 0.0042                 | 1.46                               | 0.12                   | 0.088                                 | 0.011                  | 0.930          | 916                                               | 51                    | 732                                               | 24                    | 1388                                                 | 233                   | 160                         | 80                         | a                 |
| 0.0951                             | 0.0030                 | 1.057                              | 0.048                  | 0.0806                                | 0.0047                 | 0.921          | 732                                               | 24                    | 586                                               | 18                    | 1212                                                 | 115                   | 210                         | 70                         | a                 |
| 0.0558                             | 0.0015                 | 0.541                              | 0.025                  | 0.0703                                | 0.0049                 | 0.846          | 439                                               | 17                    | 350                                               | 9                     | 938                                                  | 143                   | 157                         | 64                         | a                 |
| 0.0455                             | 0.0016                 | 0.427                              | 0.019                  | 0.0680                                | 0.0037                 | 0.848          | 361                                               | 14                    | 287                                               | 10                    | 869                                                  | 112                   | 182                         | 84                         | a                 |
| 0.00840                            | 0.00030                | 0.0706                             | 0.0087                 | 0.061                                 | 0.014                  | *              | 69                                                | 8                     | 54                                                | 2                     | 636                                                  | 509                   | 142                         | 110                        | a                 |
| 0.1401                             | 0.0044                 | 1.914                              | 0.070                  | 0.0991                                | 0.0027                 | 0.729          | 1086                                              | 24                    | 845                                               | 25                    | 1608                                                 | 51                    | 125                         | 102                        | a                 |
| 0.1682                             | 0.0066                 | 2.57                               | 0.11                   | 0.1110                                | 0.0023                 | 0.855          | 1293                                              | 31                    | 1002                                              | 37                    | 1816                                                 | 38                    | 160                         | 141                        | a                 |
| 0.2070                             | 0.0069                 | 3.69                               | 0.12                   | 0.12917                               | 0.00062                | 0.963          | 1568                                              | 27                    | 1213                                              | 37                    | 2087                                                 | 8                     | 155                         | 125                        | a                 |
| 0.1305                             | 0.0042                 | 1.785                              | 0.072                  | 0.0993                                | 0.0038                 | 0.567          | 1040                                              | 26                    | 790                                               | 24                    | 1610                                                 | 71                    | 143                         | 66                         | r                 |
| 0.0642                             | 0.0021                 | 0.681                              | 0.038                  | 0.0770                                | 0.0063                 | 0.869          | 528                                               | 23                    | 401                                               | 13                    | 1122                                                 | 162                   | 118                         | 91                         | r                 |
| 0.1969                             | 0.0077                 | 3.50                               | 0.14                   | 0.1288                                | 0.0014                 | 0.923          | 1526                                              | 31                    | 1159                                              | 41                    | 2081                                                 | 20                    | 99                          | 74                         | r                 |
| 0.203                              | 0.012                  | 3.75                               | 0.23                   | 0.1337                                | 0.0011                 | 0.963          | 1582                                              | 48                    | 1193                                              | 65                    | 2147                                                 | 14                    | 71                          | 68                         | r                 |
| 0.1791                             | 0.0081                 | 3.07                               | 0.14                   | 0.1243                                | 0.0016                 | 0.919          | 1425                                              | 36                    | 1062                                              | 44                    | 2019                                                 | 23                    | 155                         | 105                        | r                 |
| 0.2811                             | 0.0099                 | 7.26                               | 0.26                   | 0.18736                               | 0.00097                | 0.960          | 2144                                              | 32                    | 1597                                              | 50                    | 2719                                                 | 9                     | 125                         | 85                         | r                 |
| 0.1478                             | 0.0050                 | 2.260                              | 0.093                  | 0.1109                                | 0.0037                 | 0.660          | 1200                                              | 29                    | 889                                               | 28                    | 1814                                                 | 61                    | 110                         | 83                         | r                 |
| 0.2737                             | 0.0096                 | 7.20                               | 0.25                   | 0.19083                               | 0.00078                | 0.967          | 2137                                              | 31                    | 1560                                              | 49                    | 2749                                                 | 7                     | 168                         | 80                         | r                 |

| $^{206}\text{Pb}^*/^{238}\text{U}$                     | $\pm 2\sigma$<br>(abs) | $^{207}\text{Pb}^*/^{235}\text{U}$ | $\pm 2\sigma$<br>(abs) | $^{207}\text{Pb}^*/^{206}\text{Pb}^*$ | $\pm 2\sigma$<br>(abs) | corr.<br>coef. | $^{206}\text{Pb}^*/^{238}\text{U}$<br>age<br>(Ma) | $\pm 2\sigma$<br>(Ma) | $^{207}\text{Pb}^*/^{235}\text{U}$<br>age<br>(Ma) | $\pm 2\sigma$<br>(Ma) | $^{207}\text{Pb}^*/^{206}\text{Pb}^*$<br>age<br>(Ma) | $\pm 2\sigma$<br>(Ma) | Length<br>( $\mu\text{m}$ ) | Width<br>( $\mu\text{m}$ ) | Accept/<br>Reject |
|--------------------------------------------------------|------------------------|------------------------------------|------------------------|---------------------------------------|------------------------|----------------|---------------------------------------------------|-----------------------|---------------------------------------------------|-----------------------|------------------------------------------------------|-----------------------|-----------------------------|----------------------------|-------------------|
| 0.0530                                                 | 0.0017                 | 0.567                              | 0.037                  | 0.0776                                | 0.0081                 | 0.826          | 456                                               | 24                    | 333                                               | 10                    | 1138                                                 | 208                   | 170                         | 65                         | r                 |
| 0.0582                                                 | 0.0014                 | 0.650                              | 0.037                  | 0.0810                                | 0.0076                 | 0.837          | 508                                               | 23                    | 365                                               | 8                     | 1220                                                 | 185                   | 114                         | 89                         | r                 |
| 0.2104                                                 | 0.0074                 | 4.46                               | 0.16                   | 0.1536                                | 0.0016                 | 0.912          | 1723                                              | 30                    | 1231                                              | 39                    | 2386                                                 | 18                    | 116                         | 106                        | r                 |
| 0.0860                                                 | 0.0045                 | 1.104                              | 0.058                  | 0.09312                               | 0.00046                | 0.957          | 755                                               | 28                    | 532                                               | 27                    | 1490                                                 | 9                     | 76                          | 72                         | r                 |
| 0.1337                                                 | 0.0039                 | 2.107                              | 0.072                  | 0.1143                                | 0.0031                 | 0.642          | 1151                                              | 24                    | 809                                               | 22                    | 1869                                                 | 49                    | 114                         | 88                         | r                 |
| 0.0937                                                 | 0.0035                 | 1.248                              | 0.046                  | 0.09657                               | 0.00026                | 0.968          | 822                                               | 21                    | 577                                               | 20                    | 1559                                                 | 5                     | 145                         | 74                         | r                 |
| 0.0942                                                 | 0.0036                 | 1.290                              | 0.049                  | 0.09934                               | 0.00060                | 0.931          | 841                                               | 22                    | 580                                               | 21                    | 1612                                                 | 11                    | 130                         | 66                         | r                 |
| 0.180                                                  | 0.012                  | 3.64                               | 0.25                   | 0.14674                               | 0.00095                | 0.969          | 1559                                              | 55                    | 1067                                              | 68                    | 2308                                                 | 11                    | 127                         | 97                         | r                 |
| 0.02913                                                | 0.00075                | 0.307                              | 0.014                  | 0.0764                                | 0.0054                 | 0.690          | 272                                               | 11                    | 185                                               | 5                     | 1106                                                 | 142                   | 285                         | 65                         | r                 |
| 0.2030                                                 | 0.0080                 | 4.61                               | 0.19                   | 0.1648                                | 0.0027                 | 0.865          | 1752                                              | 34                    | 1192                                              | 43                    | 2506                                                 | 27                    | 145                         | 97                         | r                 |
| 0.034                                                  | 0.022                  | 0.37                               | 0.45                   | 0.08                                  | 0.16                   | 0.718          | 321                                               | 336                   | 218                                               | 135                   | 1161                                                 | 4071                  | 124                         | 95                         | a                 |
| 0.00490                                                | 0.00031                | 0.0475                             | 0.0066                 | 0.070                                 | 0.018                  | *              | 47                                                | 6                     | 32                                                | 2                     | 936                                                  | 536                   | 121                         | 88                         | r                 |
| 0.02139                                                | 0.00087                | 0.226                              | 0.013                  | 0.0766                                | 0.0061                 | 0.622          | 207                                               | 11                    | 136                                               | 6                     | 1111                                                 | 160                   | 120                         | 63                         | r                 |
| 0.0548                                                 | 0.0019                 | 0.675                              | 0.048                  | 0.089                                 | 0.010                  | 0.830          | 524                                               | 29                    | 344                                               | 12                    | 1412                                                 | 219                   | 189                         | 104                        | r                 |
| 0.03051                                                | 0.00095                | 0.342                              | 0.023                  | 0.0812                                | 0.0095                 | 0.676          | 298                                               | 18                    | 194                                               | 6                     | 1226                                                 | 229                   | 130                         | 65                         | r                 |
| 0.0609                                                 | 0.0016                 | 0.926                              | 0.080                  | 0.110                                 | 0.016                  | 0.839          | 665                                               | 42                    | 381                                               | 10                    | 1803                                                 | 269                   | 143                         | 89                         | r                 |
| 0.1134                                                 | 0.0063                 | 2.40                               | 0.17                   | 0.154                                 | 0.012                  | 0.944          | 1244                                              | 52                    | 693                                               | 36                    | 2387                                                 | 136                   | 96                          | 74                         | r                 |
| 0.0826                                                 | 0.0027                 | 1.642                              | 0.066                  | 0.1442                                | 0.0058                 | 0.930          | 987                                               | 26                    | 512                                               | 16                    | 2278                                                 | 69                    | 93                          | 82                         | r                 |
| 0.00884                                                | 0.00047                | 0.118                              | 0.012                  | 0.097                                 | 0.018                  | *              | 114                                               | 11                    | 57                                                | 3                     | 1569                                                 | 338                   | 183                         | 111                        | r                 |
| 0.0314                                                 | 0.0055                 | 0.495                              | 0.090                  | 0.114                                 | 0.015                  | 0.865          | 409                                               | 61                    | 199                                               | 34                    | 1870                                                 | 242                   | 129                         | 124                        | r                 |
| 0.0476                                                 | 0.0033                 | 0.847                              | 0.078                  | 0.129                                 | 0.015                  | 0.853          | 623                                               | 43                    | 300                                               | 20                    | 2085                                                 | 198                   | 133                         | 99                         | r                 |
| 0.0632                                                 | 0.0015                 | 1.252                              | 0.036                  | 0.1438                                | 0.0044                 | 0.903          | 824                                               | 16                    | 395                                               | 9                     | 2273                                                 | 52                    | 150                         | 105                        | r                 |
| 0.0608                                                 | 0.0041                 | 1.376                              | 0.100                  | 0.1643                                | 0.0084                 | 0.932          | 879                                               | 43                    | 380                                               | 25                    | 2500                                                 | 86                    | 170                         | 106                        | r                 |
| 0.01215                                                | 0.00036                | 0.206                              | 0.011                  | 0.123                                 | 0.011                  | 0.013          | 190                                               | 9                     | 78                                                | 2                     | 2002                                                 | 164                   | 105                         | 75                         | r                 |
| 0.0521                                                 | 0.0058                 | 1.45                               | 0.20                   | 0.202                                 | 0.031                  | 0.873          | 911                                               | 82                    | 327                                               | 35                    | 2846                                                 | 253                   | 99                          | 53                         | r                 |
| <b>3. Solimões River, Brazil (3.2208°S, 64.7815°W)</b> |                        |                                    |                        |                                       |                        |                |                                                   |                       |                                                   |                       |                                                      |                       |                             |                            |                   |
| 0.00090                                                | 0.00017                | 0.002                              | 0.024                  | 0.02                                  | 0.19                   | *              | 2                                                 | 24                    | 6                                                 | 1                     |                                                      |                       | 295                         | 125                        | a                 |
| 0.0229                                                 | 0.0011                 | 0.072                              | 0.040                  | 0.023                                 | 0.015                  | 0.732          | 71                                                | 38                    | 146                                               | 7                     |                                                      |                       | 275                         | 145                        | r                 |
| 0.00663                                                | 0.00033                | 0.022                              | 0.026                  | 0.025                                 | 0.039                  |                | 23                                                | 26                    | 43                                                | 2                     |                                                      |                       | 150                         | 124                        | r                 |
| 0.00774                                                | 0.00039                | 0.027                              | 0.026                  | 0.026                                 | 0.034                  |                | 27                                                | 26                    | 50                                                | 2                     |                                                      |                       | 347                         | 87                         | r                 |
| 0.0237                                                 | 0.0011                 | 0.102                              | 0.046                  | 0.031                                 | 0.016                  | 0.749          | 99                                                | 42                    | 151                                               | 7                     |                                                      |                       | 400                         | 220                        | r                 |
| 0.00628                                                | 0.00086                | 0.029                              | 0.041                  | 0.034                                 | 0.053                  | 0.067          | 29                                                | 40                    | 40                                                | 6                     |                                                      |                       | 250                         | 145                        | a                 |
| 0.00740                                                | 0.00037                | 0.035                              | 0.021                  | 0.034                                 | 0.029                  |                | 35                                                | 20                    | 48                                                | 2                     |                                                      |                       | 173                         | 99                         | a                 |
| 0.0435                                                 | 0.0018                 | 0.227                              | 0.077                  | 0.038                                 | 0.014                  | 0.867          | 208                                               | 63                    | 274                                               | 11                    |                                                      |                       | 225                         | 160                        | a                 |
| 0.00249                                                | 0.00018                | 0.0121                             | 0.0069                 | 0.035                                 | 0.037                  | *              | 12                                                | 7                     | 16                                                | 1                     |                                                      |                       | 240                         | 190                        | a                 |
| 0.0237                                                 | 0.0013                 | 0.125                              | 0.071                  | 0.038                                 | 0.025                  | 0.752          | 120                                               | 64                    | 151                                               | 8                     |                                                      |                       | 340                         | 140                        | a                 |
| 0.00695                                                | 0.00032                | 0.036                              | 0.012                  | 0.038                                 | 0.015                  | 0.123          | 36                                                | 12                    | 45                                                | 2                     |                                                      |                       | 245                         | 190                        | a                 |
| 0.0311                                                 | 0.0012                 | 0.169                              | 0.024                  | 0.0395                                | 0.0062                 | 0.817          | 159                                               | 21                    | 197                                               | 8                     |                                                      |                       | 390                         | 165                        | a                 |
| 0.0760                                                 | 0.0038                 | 0.484                              | 0.061                  | 0.0462                                | 0.0071                 |                | 401                                               | 42                    | 472                                               | 23                    | 8                                                    | 369                   | 182                         | 87                         | a                 |
| 0.1103                                                 | 0.0055                 | 0.77                               | 0.14                   | 0.051                                 | 0.012                  |                | 582                                               | 82                    | 674                                               | 32                    | 237                                                  | 529                   | 221                         | 103                        | a                 |
| 0.1710                                                 | 0.0084                 | 2.12                               | 0.12                   | 0.0898                                | 0.0024                 | 0.893          | 1154                                              | 40                    | 1017                                              | 46                    | 1422                                                 | 51                    | 175                         | 75                         | a                 |
| 0.0330                                                 | 0.0015                 | 0.197                              | 0.023                  | 0.0433                                | 0.0086                 | 0.701          | 183                                               | 20                    | 209                                               | 10                    |                                                      |                       | 207                         | 150                        | a                 |
| 0.1399                                                 | 0.0077                 | 1.075                              | 0.074                  | 0.0557                                | 0.0035                 | 0.799          | 741                                               | 36                    | 844                                               | 43                    | 441                                                  | 139                   | 225                         | 230                        | a                 |
| 0.253                                                  | 0.014                  | 4.42                               | 0.29                   | 0.1269                                | 0.0034                 | 0.911          | 1716                                              | 54.4767               | 1452                                              | 72                    | 2055                                                 | 47                    | 205                         | 140                        | a                 |
| 0.0328                                                 | 0.0016                 | 0.200                              | 0.074                  | 0.044                                 | 0.019                  | 0.822          | 185                                               | 62.8042               | 208                                               | 10                    |                                                      |                       | 240                         | 160                        | a                 |
| 0.0502                                                 | 0.0025                 | 0.321                              | 0.055                  | 0.0464                                | 0.0100                 |                | 283                                               | 42.4052               | 316                                               | 15                    | 18                                                   | 517                   | 257                         | 125                        | a                 |
| 0.0229                                                 | 0.0011                 | 0.138                              | 0.014                  | 0.0437                                | 0.0054                 |                | 131                                               | 12.0734               | 146                                               | 7                     |                                                      |                       | 358                         | 172                        | a                 |
| 0.216                                                  | 0.020                  | 3.07                               | 0.33                   | 0.1029                                | 0.0041                 | 0.922          | 1425                                              | 82.3031               | 1262                                              | 104                   | 1677                                                 | 75                    | 225                         | 90                         | a                 |
| 0.1021                                                 | 0.0050                 | 0.76                               | 0.14                   | 0.054                                 | 0.010                  | 0.950          | 575                                               | 82.8232               | 627                                               | 29                    | 377                                                  | 419                   | 240                         | 125                        | a                 |
| 0.0670                                                 | 0.0033                 | 0.462                              | 0.030                  | 0.0500                                | 0.0036                 | 0.903          | 386                                               | 20.9719               | 418                                               | 20                    | 196                                                  | 169                   | 145                         | 120                        | a                 |
| 0.1778                                                 | 0.0090                 | 2.09                               | 0.13                   | 0.0851                                | 0.0027                 | 0.887          | 1144                                              | 43.6121               | 1055                                              | 49                    | 1317                                                 | 61                    | 300                         | 145                        | a                 |

| $^{206}\text{Pb}^*/^{238}\text{U}$ | $\pm 2\sigma$<br>(abs) | $^{207}\text{Pb}^*/^{235}\text{U}$ | $\pm 2\sigma$<br>(abs) | $^{207}\text{Pb}^*/^{206}\text{Pb}^*$ | $\pm 2\sigma$<br>(abs) | corr.<br>coef. | $^{206}\text{Pb}^*/^{238}\text{U}$<br>age<br>(Ma) | $\pm 2\sigma$<br>(Ma) | $^{207}\text{Pb}^*/^{235}\text{U}$<br>age<br>(Ma) | $\pm 2\sigma$<br>(Ma) | $^{207}\text{Pb}^*/^{206}\text{Pb}^*$<br>age<br>(Ma) | $\pm 2\sigma$<br>(Ma) | Length<br>( $\mu\text{m}$ ) | Width<br>( $\mu\text{m}$ ) | Accept/<br>Reject |
|------------------------------------|------------------------|------------------------------------|------------------------|---------------------------------------|------------------------|----------------|---------------------------------------------------|-----------------------|---------------------------------------------------|-----------------------|------------------------------------------------------|-----------------------|-----------------------------|----------------------------|-------------------|
| 0.259                              | 0.014                  | 4.13                               | 0.27                   | 0.1158                                | 0.0031                 | 0.922          | 1660                                              | 53.9617               | 1483                                              | 74                    | 1892                                                 | 48                    | 125                         | 100                        | a                 |
| 0.0474                             | 0.0018                 | 0.313                              | 0.021                  | 0.0480                                | 0.0028                 | 0.904          | 277                                               | 15.9585               | 298                                               | 11                    | 98                                                   | 138                   | 320                         | 130                        | a                 |
| 0.1681                             | 0.0081                 | 1.89                               | 0.11                   | 0.0815                                | 0.0022                 | 0.899          | 1077                                              | 38.0165               | 1002                                              | 45                    | 1233                                                 | 53                    | 290                         | 75                         | a                 |
| 0.0893                             | 0.0045                 | 0.673                              | 0.040                  | 0.0547                                | 0.0032                 |                | 522                                               | 24.0303               | 551                                               | 26                    | 398                                                  | 131                   | 323                         | 154                        | a                 |
| 0.393                              | 0.030                  | 9.82                               | 0.86                   | 0.1814                                | 0.0047                 | 0.944          | 2418                                              | 80.3550               | 2135                                              | 141                   | 2665                                                 | 43                    | 170                         | 135                        | a                 |
| 0.0400                             | 0.0018                 | 0.266                              | 0.020                  | 0.0483                                | 0.0033                 | 0.885          | 240                                               | 16.3803               | 253                                               | 11                    | 116                                                  | 162                   | 250                         | 130                        | a                 |
| 0.1739                             | 0.0090                 | 1.92                               | 0.10                   | 0.0802                                | 0.0021                 | 0.900          | 1089                                              | 36.1858               | 1033                                              | 49                    | 1201                                                 | 52                    | 215                         | 155                        | a                 |
| 0.0636                             | 0.0026                 | 0.456                              | 0.030                  | 0.0520                                | 0.0029                 | 0.579          | 382                                               | 21.0510               | 397                                               | 16                    | 287                                                  | 126                   | 270                         | 135                        | a                 |
| 0.0356                             | 0.0016                 | 0.238                              | 0.012                  | 0.0484                                | 0.0020                 | 0.870          | 216                                               | 10                    | 225                                               | 10                    | 121                                                  | 97                    | 295                         | 208                        | a                 |
| 0.0945                             | 0.0039                 | 0.735                              | 0.055                  | 0.0564                                | 0.0037                 | 0.639          | 560                                               | 32                    | 582                                               | 23                    | 469                                                  | 145                   | 155                         | 125                        | a                 |
| 0.1703                             | 0.0087                 | 1.827                              | 0.099                  | 0.0778                                | 0.0021                 | 0.899          | 1055                                              | 35                    | 1014                                              | 48                    | 1142                                                 | 53                    | 225                         | 190                        | a                 |
| 0.188                              | 0.010                  | 2.13                               | 0.13                   | 0.0823                                | 0.0030                 | 0.874          | 1159                                              | 42                    | 1109                                              | 56                    | 1253                                                 | 72                    | 260                         | 110                        | a                 |
| 0.1761                             | 0.0091                 | 1.91                               | 0.10                   | 0.0787                                | 0.0021                 | 0.904          | 1085                                              | 36                    | 1046                                              | 50                    | 1165                                                 | 52                    | 146                         | 143                        | a                 |
| 0.0359                             | 0.0016                 | 0.243                              | 0.014                  | 0.0491                                | 0.0028                 | 0.835          | 221                                               | 11                    | 228                                               | 10                    | 153                                                  | 134                   | 235                         | 125                        | a                 |
| 0.1789                             | 0.0095                 | 1.94                               | 0.11                   | 0.0786                                | 0.0021                 | 0.906          | 1094                                              | 37                    | 1061                                              | 52                    | 1161                                                 | 53                    | 230                         | 100                        | a                 |
| 0.1781                             | 0.0091                 | 1.92                               | 0.12                   | 0.0783                                | 0.0022                 | 0.907          | 1089                                              | 41                    | 1057                                              | 50                    | 1155                                                 | 57                    | 205                         | 145                        | a                 |
| 0.201                              | 0.011                  | 2.32                               | 0.13                   | 0.0840                                | 0.0022                 | 0.913          | 1219                                              | 40                    | 1178                                              | 58                    | 1292                                                 | 52                    | 180                         | 150                        | a                 |
| 0.0405                             | 0.0020                 | 0.279                              | 0.023                  | 0.0499                                | 0.0050                 |                | 250                                               | 18                    | 256                                               | 13                    | 190                                                  | 234                   | 232                         | 124                        | a                 |
| 0.1605                             | 0.0080                 | 1.51                               | 0.11                   | 0.0684                                | 0.0058                 |                | 936                                               | 46                    | 959                                               | 45                    | 881                                                  | 176                   | 213                         | 111                        | a                 |
| 0.0847                             | 0.0042                 | 0.657                              | 0.035                  | 0.0562                                | 0.0031                 |                | 513                                               | 21                    | 524                                               | 25                    | 461                                                  | 120                   | 134                         | 161                        | a                 |
| 0.191                              | 0.011                  | 2.12                               | 0.14                   | 0.0805                                | 0.0022                 | 0.921          | 1155                                              | 46                    | 1126                                              | 58                    | 1210                                                 | 55                    | 270                         | 125                        | a                 |
| 0.0401                             | 0.0018                 | 0.277                              | 0.020                  | 0.0501                                | 0.0051                 | 0.796          | 248                                               | 16                    | 253                                               | 11                    | 200                                                  | 235                   | 275                         | 165                        | a                 |
| 0.1691                             | 0.0087                 | 1.753                              | 0.095                  | 0.0751                                | 0.0020                 | 0.902          | 1028                                              | 35                    | 1007                                              | 48                    | 1072                                                 | 53                    | 240                         | 125                        | a                 |
| 0.185                              | 0.010                  | 2.00                               | 0.15                   | 0.0785                                | 0.0028                 | 0.900          | 1116                                              | 49                    | 1093                                              | 57                    | 1160                                                 | 70                    | 95                          | 100                        | a                 |
| 0.1159                             | 0.0057                 | 0.983                              | 0.057                  | 0.0615                                | 0.0018                 | 0.876          | 695                                               | 29                    | 707                                               | 33                    | 657                                                  | 64                    | 120                         | 110                        | a                 |
| 0.0950                             | 0.0045                 | 0.763                              | 0.040                  | 0.0582                                | 0.0022                 | 0.784          | 576                                               | 23                    | 585                                               | 27                    | 538                                                  | 82                    | 135                         | 100                        | a                 |
| 0.0984                             | 0.0040                 | 0.800                              | 0.040                  | 0.0590                                | 0.0018                 | 0.824          | 597                                               | 23                    | 605                                               | 23                    | 565                                                  | 67                    | 125                         | 120                        | a                 |
| 0.1729                             | 0.0089                 | 1.789                              | 0.098                  | 0.0750                                | 0.0020                 | 0.903          | 1042                                              | 36                    | 1028                                              | 49                    | 1070                                                 | 54                    | 160                         | 110                        | a                 |
| 0.0439                             | 0.0018                 | 0.310                              | 0.015                  | 0.0512                                | 0.0016                 | 0.650          | 274                                               | 12                    | 277                                               | 11                    | 249                                                  | 70                    | 230                         | 75                         | a                 |
| 0.1701                             | 0.0087                 | 1.741                              | 0.094                  | 0.0742                                | 0.0019                 | 0.905          | 1024                                              | 35                    | 1013                                              | 48                    | 1047                                                 | 53                    | 295                         | 100                        | a                 |
| 0.1398                             | 0.0069                 | 1.279                              | 0.067                  | 0.0664                                | 0.0018                 | 0.887          | 836                                               | 30                    | 843                                               | 39                    | 819                                                  | 57                    | 150                         | 100                        | a                 |
| 0.01937                            | 0.00088                | 0.129                              | 0.017                  | 0.048                                 | 0.011                  | 0.459          | 123                                               | 15                    | 124                                               | 6                     | 106                                                  | 524                   | 230                         | 130                        | a                 |
| 0.0400                             | 0.0018                 | 0.281                              | 0.017                  | 0.0509                                | 0.0033                 | 0.842          | 251                                               | 13                    | 253                                               | 11                    | 235                                                  | 148                   | 190                         | 195                        | a                 |
| 0.0533                             | 0.0024                 | 0.388                              | 0.019                  | 0.0527                                | 0.0018                 | 0.642          | 333                                               | 14                    | 335                                               | 15                    | 318                                                  | 78                    | 240                         | 90                         | a                 |
| 0.0326                             | 0.0012                 | 0.225                              | 0.015                  | 0.0499                                | 0.0032                 | 0.852          | 206                                               | 13                    | 207                                               | 8                     | 191                                                  | 149                   | 335                         | 240                        | a                 |
| 0.1203                             | 0.0060                 | 1.048                              | 0.097                  | 0.0632                                | 0.0069                 |                | 728                                               | 48                    | 732                                               | 35                    | 716                                                  | 232                   | 117                         | 94                         | a                 |
| 0.195                              | 0.011                  | 2.12                               | 0.14                   | 0.0789                                | 0.0021                 | 0.930          | 1155                                              | 47                    | 1148                                              | 62                    | 1169                                                 | 53                    | 200                         | 80                         | a                 |
| 0.1551                             | 0.0078                 | 1.487                              | 0.054                  | 0.0696                                | 0.0013                 |                | 925                                               | 22                    | 929                                               | 43                    | 915                                                  | 37                    | 178                         | 135                        | a                 |
| 0.02677                            | 0.00096                | 0.1817                             | 0.0091                 | 0.0492                                | 0.0019                 | 0.850          | 170                                               | 8                     | 170                                               | 6                     | 159                                                  | 92                    | 170                         | 130                        | a                 |
| 0.1811                             | 0.0096                 | 1.88                               | 0.12                   | 0.0755                                | 0.0020                 | 0.919          | 1076                                              | 41                    | 1073                                              | 52                    | 1081                                                 | 54                    | 126                         | 115                        | a                 |
| 0.1046                             | 0.0050                 | 0.881                              | 0.045                  | 0.0610                                | 0.0017                 | 0.853          | 641                                               | 24                    | 641                                               | 29                    | 641                                                  | 60                    | 245                         | 115                        | a                 |
| 0.0485                             | 0.0022                 | 0.351                              | 0.018                  | 0.0524                                | 0.0018                 | 0.584          | 305                                               | 13                    | 305                                               | 14                    | 305                                                  | 80                    | 190                         | 115                        | a                 |
| 0.1559                             | 0.0079                 | 1.51                               | 0.12                   | 0.0702                                | 0.0073                 | 0.552          | 934                                               | 50                    | 934                                               | 44                    | 935                                                  | 212                   | 185                         | 140                        | a                 |
| 0.0981                             | 0.0049                 | 0.812                              | 0.028                  | 0.0601                                | 0.0012                 |                | 604                                               | 16                    | 603                                               | 29                    | 606                                                  | 45                    | 228                         | 120                        | a                 |
| 0.1104                             | 0.0053                 | 0.947                              | 0.049                  | 0.0622                                | 0.0018                 | 0.849          | 676                                               | 26                    | 675                                               | 31                    | 680                                                  | 63                    | 115                         | 90                         | a                 |
| 0.0555                             | 0.0021                 | 0.410                              | 0.021                  | 0.0536                                | 0.0020                 | 0.633          | 349                                               | 15                    | 348                                               | 13                    | 354                                                  | 84                    | 205                         | 115                        | a                 |
| 0.0232                             | 0.0010                 | 0.1570                             | 0.0083                 | 0.0491                                | 0.0025                 | 0.760          | 148                                               | 7                     | 148                                               | 6                     | 153                                                  | 118                   | 175                         | 125                        | a                 |
| 0.1199                             | 0.0052                 | 1.056                              | 0.055                  | 0.0639                                | 0.0018                 | 0.866          | 732                                               | 27                    | 730                                               | 30                    | 737                                                  | 60                    | 165                         | 135                        | a                 |
| 0.1953                             | 0.0098                 | 2.114                              | 0.074                  | 0.0785                                | 0.0013                 |                | 1153                                              | 24                    | 1150                                              | 53                    | 1159                                                 | 34                    | 104                         | 109                        | a                 |
| 0.0437                             | 0.0020                 | 0.313                              | 0.015                  | 0.0520                                | 0.0014                 | 0.658          | 277                                               | 12                    | 276                                               | 12                    | 286                                                  | 62                    | 185                         | 80                         | a                 |
| 0.1987                             | 0.0099                 | 2.175                              | 0.078                  | 0.0794                                | 0.0016                 |                | 1173                                              | 25                    | 1168                                              | 54                    | 1182                                                 | 39                    | 184                         | 134                        | a                 |

| $^{206}\text{Pb}^*/^{238}\text{U}$ | $\pm 2\sigma$<br>(abs) | $^{207}\text{Pb}^*/^{235}\text{U}$ | $\pm 2\sigma$<br>(abs) | $^{207}\text{Pb}^*/^{206}\text{Pb}^*$ | $\pm 2\sigma$<br>(abs) | corr.<br>coef. | $^{206}\text{Pb}^*/^{238}\text{U}$<br>age<br>(Ma) | $\pm 2\sigma$<br>(Ma) | $^{207}\text{Pb}^*/^{235}\text{U}$<br>age<br>(Ma) | $\pm 2\sigma$<br>(Ma) | $^{207}\text{Pb}^*/^{206}\text{Pb}^*$<br>age<br>(Ma) | $\pm 2\sigma$<br>(Ma) | Length<br>( $\mu\text{m}$ ) | Width<br>( $\mu\text{m}$ ) | Accept/<br>Reject |
|------------------------------------|------------------------|------------------------------------|------------------------|---------------------------------------|------------------------|----------------|---------------------------------------------------|-----------------------|---------------------------------------------------|-----------------------|------------------------------------------------------|-----------------------|-----------------------------|----------------------------|-------------------|
| 0.0511                             | 0.0026                 | 0.374                              | 0.020                  | 0.0531                                | 0.0031                 |                | 323                                               | 15                    | 321                                               | 16                    | 334                                                  | 132                   | 364                         | 100                        | a                 |
| 0.1403                             | 0.0074                 | 1.31                               | 0.10                   | 0.0679                                | 0.0035                 | 0.823          | 852                                               | 45                    | 846                                               | 42                    | 865                                                  | 106                   | 105                         | 50                         | a                 |
| 0.00647                            | 0.00036                | 0.042                              | 0.020                  | 0.047                                 | 0.025                  | 0.094          | 42                                                | 19                    | 42                                                | 2                     | 58                                                   | 1264                  | 240                         | 70                         | a                 |
| 0.0402                             | 0.0020                 | 0.287                              | 0.017                  | 0.0518                                | 0.0035                 |                | 256                                               | 13                    | 254                                               | 12                    | 275                                                  | 153                   | 431                         | 164                        | a                 |
| 0.0652                             | 0.0041                 | 0.500                              | 0.053                  | 0.0555                                | 0.0048                 | 0.556          | 411                                               | 36                    | 407                                               | 25                    | 434                                                  | 192                   | 210                         | 95                         | a                 |
| 0.1401                             | 0.0070                 | 1.319                              | 0.047                  | 0.0683                                | 0.0014                 |                | 854                                               | 20                    | 845                                               | 40                    | 877                                                  | 41                    | 237                         | 78                         | a                 |
| 0.1170                             | 0.0050                 | 1.035                              | 0.055                  | 0.0642                                | 0.0020                 | 0.843          | 721                                               | 27                    | 713                                               | 29                    | 747                                                  | 67                    | 205                         | 85                         | a                 |
| 0.1804                             | 0.0098                 | 1.82                               | 0.11                   | 0.0733                                | 0.0024                 | 0.894          | 1053                                              | 39                    | 1069                                              | 54                    | 1021                                                 | 67                    | 180                         | 120                        | a                 |
| 0.249                              | 0.012                  | 3.18                               | 0.11                   | 0.0926                                | 0.0019                 |                | 1452                                              | 27                    | 1433                                              | 65                    | 1480                                                 | 40                    | 191                         | 92                         | a                 |
| 0.1082                             | 0.0051                 | 0.937                              | 0.049                  | 0.0628                                | 0.0021                 | 0.820          | 671                                               | 26                    | 662                                               | 30                    | 703                                                  | 72                    | 225                         | 125                        | a                 |
| 0.0415                             | 0.0015                 | 0.299                              | 0.014                  | 0.0523                                | 0.0018                 | 0.541          | 266                                               | 11                    | 262                                               | 9                     | 300                                                  | 78                    | 275                         | 175                        | a                 |
| 0.1778                             | 0.0089                 | 1.87                               | 0.10                   | 0.0764                                | 0.0040                 |                | 1072                                              | 36                    | 1055                                              | 49                    | 1105                                                 | 104                   | 193                         | 121                        | a                 |
| 0.1722                             | 0.0086                 | 1.786                              | 0.057                  | 0.07523                               | 0.00053                |                | 1040                                              | 21                    | 1024                                              | 48                    | 1075                                                 | 14                    | 188                         | 106                        | a                 |
| 0.0446                             | 0.0022                 | 0.326                              | 0.019                  | 0.0529                                | 0.0034                 |                | 286                                               | 14                    | 281                                               | 14                    | 326                                                  | 144                   | 144                         | 80                         | a                 |
| 0.1522                             | 0.0076                 | 1.502                              | 0.057                  | 0.0716                                | 0.0019                 |                | 931                                               | 23                    | 913                                               | 43                    | 974                                                  | 55                    | 172                         | 96                         | a                 |
| 0.1690                             | 0.0084                 | 1.748                              | 0.056                  | 0.07502                               | 0.00034                |                | 1026                                              | 21                    | 1006                                              | 47                    | 1069                                                 | 9                     | 192                         | 123                        | a                 |
| 0.1751                             | 0.0091                 | 1.722                              | 0.094                  | 0.0713                                | 0.0019                 | 0.909          | 1017                                              | 35                    | 1040                                              | 50                    | 966                                                  | 55                    | 260                         | 120                        | a                 |
| 0.0409                             | 0.0015                 | 0.296                              | 0.013                  | 0.0526                                | 0.0015                 | 0.604          | 264                                               | 10                    | 258                                               | 9                     | 310                                                  | 65                    | 245                         | 140                        | a                 |
| 0.0874                             | 0.0041                 | 0.721                              | 0.036                  | 0.0599                                | 0.0017                 | 0.812          | 551                                               | 21                    | 540                                               | 24                    | 598                                                  | 63                    | 235                         | 150                        | a                 |
| 0.1057                             | 0.0045                 | 0.918                              | 0.050                  | 0.0630                                | 0.0022                 | 0.810          | 661                                               | 26                    | 648                                               | 26                    | 708                                                  | 75                    | 150                         | 105                        | a                 |
| 0.1589                             | 0.0075                 | 1.601                              | 0.089                  | 0.0731                                | 0.0019                 | 0.902          | 971                                               | 35                    | 951                                               | 42                    | 1017                                                 | 54                    | 265                         | 115                        | a                 |
| 0.1686                             | 0.0084                 | 1.747                              | 0.057                  | 0.07515                               | 0.00085                |                | 1026                                              | 21                    | 1005                                              | 47                    | 1073                                                 | 23                    | 147                         | 96                         | a                 |
| 0.0863                             | 0.0034                 | 0.711                              | 0.035                  | 0.0598                                | 0.0017                 | 0.804          | 545                                               | 20                    | 533                                               | 20                    | 595                                                  | 63                    | 350                         | 140                        | a                 |
| 0.1106                             | 0.0055                 | 0.977                              | 0.032                  | 0.06406                               | 0.00061                |                | 692                                               | 16                    | 676                                               | 32                    | 743                                                  | 20                    | 168                         | 100                        | a                 |
| 0.254                              | 0.013                  | 3.37                               | 0.11                   | 0.09611                               | 0.00033                |                | 1497                                              | 25                    | 1461                                              | 66                    | 1550                                                 | 6                     | 175                         | 143                        | a                 |
| 0.1607                             | 0.0080                 | 1.640                              | 0.059                  | 0.0740                                | 0.0015                 |                | 986                                               | 23                    | 961                                               | 45                    | 1042                                                 | 42                    | 252                         | 150                        | a                 |
| 0.1608                             | 0.0080                 | 1.642                              | 0.054                  | 0.07406                               | 0.00071                |                | 987                                               | 21                    | 961                                               | 45                    | 1043                                                 | 19                    | 315                         | 197                        | a                 |
| 0.1650                             | 0.0084                 | 1.705                              | 0.092                  | 0.0750                                | 0.0020                 | 0.900          | 1011                                              | 34                    | 985                                               | 47                    | 1067                                                 | 53                    | 200                         | 130                        | a                 |
| 0.1969                             | 0.0098                 | 2.231                              | 0.078                  | 0.0822                                | 0.0015                 |                | 1191                                              | 25                    | 1158                                              | 53                    | 1250                                                 | 35                    | 273                         | 110                        | a                 |
| 0.1784                             | 0.0089                 | 1.920                              | 0.064                  | 0.07804                               | 0.00093                |                | 1088                                              | 22                    | 1058                                              | 49                    | 1148                                                 | 24                    | 101                         | 99                         | a                 |
| 0.1575                             | 0.0079                 | 1.597                              | 0.052                  | 0.07359                               | 0.00063                |                | 969                                               | 20                    | 943                                               | 44                    | 1030                                                 | 17                    | 298                         | 126                        | a                 |
| 0.0883                             | 0.0036                 | 0.738                              | 0.040                  | 0.0606                                | 0.0022                 | 0.758          | 561                                               | 23                    | 545                                               | 21                    | 626                                                  | 80                    | 260                         | 160                        | a                 |
| 0.195                              | 0.011                  | 1.97                               | 0.12                   | 0.0730                                | 0.0026                 | 0.898          | 1104                                              | 42                    | 1150                                              | 60                    | 1015                                                 | 73                    | 161                         | 85                         | a                 |
| 0.0297                             | 0.0011                 | 0.212                              | 0.019                  | 0.0516                                | 0.0047                 | 0.822          | 195                                               | 16                    | 189                                               | 7                     | 267                                                  | 210                   | 305                         | 155                        | a                 |
| 0.0288                             | 0.0014                 | 0.2044                             | 0.0097                 | 0.0515                                | 0.0025                 |                | 189                                               | 8                     | 183                                               | 9                     | 261                                                  | 113                   | 149                         | 133                        | a                 |
| 0.1579                             | 0.0079                 | 1.613                              | 0.054                  | 0.0741                                | 0.0010                 |                | 975                                               | 21                    | 945                                               | 44                    | 1044                                                 | 28                    | 208                         | 88                         | a                 |
| 0.0827                             | 0.0041                 | 0.684                              | 0.040                  | 0.0600                                | 0.0035                 |                | 529                                               | 24                    | 512                                               | 25                    | 603                                                  | 126                   | 191                         | 103                        | a                 |
| 0.0427                             | 0.0016                 | 0.316                              | 0.020                  | 0.0537                                | 0.0030                 | 0.892          | 279                                               | 15                    | 270                                               | 10                    | 359                                                  | 127                   | 260                         | 205                        | a                 |
| 0.0372                             | 0.0017                 | 0.271                              | 0.019                  | 0.0529                                | 0.0048                 | 0.798          | 244                                               | 15                    | 235                                               | 11                    | 326                                                  | 204                   | 325                         | 137                        | a                 |
| 0.0284                             | 0.0013                 | 0.202                              | 0.011                  | 0.0517                                | 0.0024                 | 0.822          | 187                                               | 9                     | 181                                               | 8                     | 271                                                  | 105                   | 235                         | 104                        | a                 |
| 0.141                              | 0.013                  | 1.39                               | 0.16                   | 0.0712                                | 0.0042                 | 0.877          | 883                                               | 67                    | 851                                               | 73                    | 964                                                  | 119                   | 320                         | 205                        | a                 |
| 0.1425                             | 0.0064                 | 1.406                              | 0.078                  | 0.0715                                | 0.0021                 | 0.875          | 891                                               | 33                    | 859                                               | 36                    | 973                                                  | 60                    | 205                         | 145                        | a                 |
| 0.1448                             | 0.0071                 | 1.438                              | 0.076                  | 0.0720                                | 0.0021                 | 0.874          | 905                                               | 32                    | 872                                               | 40                    | 987                                                  | 60                    | 210                         | 205                        | a                 |
| 0.1816                             | 0.0091                 | 2.012                              | 0.087                  | 0.0804                                | 0.0030                 |                | 1120                                              | 29                    | 1076                                              | 50                    | 1206                                                 | 73                    | 214                         | 121                        | a                 |
| 0.1690                             | 0.0085                 | 1.810                              | 0.061                  | 0.0777                                | 0.0011                 |                | 1049                                              | 22                    | 1007                                              | 47                    | 1139                                                 | 28                    | 173                         | 128                        | a                 |
| 0.1398                             | 0.0062                 | 1.383                              | 0.073                  | 0.0717                                | 0.0019                 | 0.882          | 882                                               | 31                    | 844                                               | 35                    | 978                                                  | 55                    | 230                         | 145                        | a                 |
| 0.1863                             | 0.0093                 | 2.11                               | 0.10                   | 0.0820                                | 0.0039                 |                | 1151                                              | 34                    | 1101                                              | 51                    | 1246                                                 | 92                    | 148                         | 102                        | a                 |
| 0.0490                             | 0.0023                 | 0.374                              | 0.022                  | 0.0553                                | 0.0031                 | 0.885          | 322                                               | 16                    | 308                                               | 14                    | 425                                                  | 127                   | 256                         | 172                        | a                 |
| 0.0733                             | 0.0032                 | 0.600                              | 0.040                  | 0.0593                                | 0.0031                 | 0.625          | 477                                               | 25                    | 456                                               | 19                    | 578                                                  | 115                   | 255                         | 135                        | a                 |
| 0.1386                             | 0.0061                 | 1.368                              | 0.072                  | 0.0716                                | 0.0020                 | 0.878          | 875                                               | 31                    | 837                                               | 35                    | 975                                                  | 56                    | 220                         | 190                        | a                 |
| 0.1852                             | 0.0093                 | 2.10                               | 0.13                   | 0.0824                                | 0.0057                 |                | 1150                                              | 44                    | 1095                                              | 51                    | 1255                                                 | 135                   | 218                         | 187                        | a                 |

| $^{206}\text{Pb}^*/^{238}\text{U}$ | $\pm 2\sigma$<br>(abs) | $^{207}\text{Pb}^*/^{235}\text{U}$ | $\pm 2\sigma$<br>(abs) | $^{207}\text{Pb}^*/^{206}\text{Pb}^*$ | $\pm 2\sigma$<br>(abs) | corr.<br>coef. | $^{206}\text{Pb}^*/^{238}\text{U}$<br>age<br>(Ma) | $\pm 2\sigma$<br>(Ma) | $^{207}\text{Pb}^*/^{235}\text{U}$<br>age<br>(Ma) | $\pm 2\sigma$<br>(Ma) | $^{207}\text{Pb}^*/^{206}\text{Pb}^*$<br>age<br>(Ma) | $\pm 2\sigma$<br>(Ma) | Length<br>( $\mu\text{m}$ ) | Width<br>( $\mu\text{m}$ ) | Accept/<br>Reject |
|------------------------------------|------------------------|------------------------------------|------------------------|---------------------------------------|------------------------|----------------|---------------------------------------------------|-----------------------|---------------------------------------------------|-----------------------|------------------------------------------------------|-----------------------|-----------------------------|----------------------------|-------------------|
| 0.1584                             | 0.0074                 | 1.668                              | 0.092                  | 0.0764                                | 0.0020                 | 0.898          | 996                                               | 35                    | 948                                               | 41                    | 1105                                                 | 52                    | 190                         | 120                        | a                 |
| 0.0398                             | 0.0015                 | 0.298                              | 0.013                  | 0.0543                                | 0.0014                 | 0.615          | 265                                               | 10                    | 251                                               | 9                     | 384                                                  | 59                    | 320                         | 185                        | a                 |
| 0.1494                             | 0.0097                 | 1.54                               | 0.12                   | 0.0749                                | 0.0028                 | 0.889          | 948                                               | 48                    | 898                                               | 54                    | 1065                                                 | 76                    | 200                         | 115                        | a                 |
| 0.1512                             | 0.0070                 | 1.571                              | 0.091                  | 0.0754                                | 0.0024                 | 0.873          | 959                                               | 36                    | 908                                               | 39                    | 1078                                                 | 63                    | 250                         | 150                        | a                 |
| 0.0374                             | 0.0019                 | 0.280                              | 0.015                  | 0.0543                                | 0.0031                 |                | 251                                               | 12                    | 237                                               | 12                    | 383                                                  | 126                   | 186                         | 123                        | a                 |
| 0.0379                             | 0.0017                 | 0.285                              | 0.016                  | 0.0544                                | 0.0034                 | 0.837          | 254                                               | 13                    | 240                                               | 11                    | 390                                                  | 138                   | 295                         | 160                        | a                 |
| 0.0527                             | 0.0026                 | 0.416                              | 0.022                  | 0.0572                                | 0.0033                 |                | 353                                               | 16                    | 331                                               | 16                    | 500                                                  | 125                   | 178                         | 78                         | a                 |
| 0.1619                             | 0.0083                 | 1.763                              | 0.095                  | 0.0789                                | 0.0022                 | 0.890          | 1032                                              | 35                    | 968                                               | 46                    | 1171                                                 | 54                    | 185                         | 170                        | a                 |
| 0.1575                             | 0.0076                 | 1.69                               | 0.11                   | 0.0780                                | 0.0028                 | 0.861          | 1006                                              | 40                    | 943                                               | 43                    | 1146                                                 | 72                    | 220                         | 100                        | a                 |
| 0.1507                             | 0.0069                 | 1.590                              | 0.086                  | 0.0765                                | 0.0020                 | 0.888          | 966                                               | 34                    | 905                                               | 39                    | 1109                                                 | 53                    | 145                         | 125                        | a                 |
| 0.1586                             | 0.0074                 | 1.718                              | 0.097                  | 0.0785                                | 0.0022                 | 0.886          | 1015                                              | 36                    | 949                                               | 41                    | 1160                                                 | 56                    | 265                         | 175                        | a                 |
| 0.1260                             | 0.0063                 | 1.241                              | 0.044                  | 0.0714                                | 0.0014                 |                | 819                                               | 20                    | 765                                               | 36                    | 970                                                  | 41                    | 167                         | 91                         | a                 |
| 0.1638                             | 0.0083                 | 1.805                              | 0.100                  | 0.0800                                | 0.0025                 | 0.872          | 1047                                              | 36                    | 978                                               | 46                    | 1196                                                 | 62                    | 260                         | 170                        | a                 |
| 0.1595                             | 0.0074                 | 1.756                              | 0.097                  | 0.0799                                | 0.0021                 | 0.892          | 1029                                              | 36                    | 954                                               | 41                    | 1194                                                 | 52                    | 235                         | 160                        | a                 |
| 0.0454                             | 0.0021                 | 0.356                              | 0.022                  | 0.0568                                | 0.0039                 | 0.858          | 309                                               | 16                    | 286                                               | 13                    | 486                                                  | 152                   | 200                         | 120                        | a                 |
| 0.0983                             | 0.0042                 | 0.903                              | 0.073                  | 0.0666                                | 0.0046                 | 0.592          | 653                                               | 39                    | 605                                               | 25                    | 824                                                  | 145                   | 140                         | 95                         | a                 |
| 0.1445                             | 0.0066                 | 1.538                              | 0.091                  | 0.0772                                | 0.0027                 | 0.842          | 946                                               | 37                    | 870                                               | 37                    | 1127                                                 | 71                    | 305                         | 116                        | a                 |
| 0.1381                             | 0.0069                 | 1.451                              | 0.080                  | 0.0762                                | 0.0044                 |                | 910                                               | 33                    | 834                                               | 39                    | 1101                                                 | 116                   | 223                         | 137                        | a                 |
| 0.0409                             | 0.0019                 | 0.323                              | 0.018                  | 0.0573                                | 0.0029                 | 0.873          | 284                                               | 14                    | 258                                               | 12                    | 502                                                  | 112                   | 310                         | 135                        | a                 |
| 0.0600                             | 0.0028                 | 0.506                              | 0.030                  | 0.0611                                | 0.0037                 | 0.903          | 416                                               | 21                    | 376                                               | 17                    | 642                                                  | 129                   | 240                         | 115                        | a                 |
| 0.00315                            | 0.00031                | 0.022                              | 0.028                  | 0.052                                 | 0.070                  | *              | 22                                                | 28                    | 20                                                | 2                     | 264                                                  | 3113                  | 335                         | 130                        | a                 |
| 0.0679                             | 0.0031                 | 0.599                              | 0.030                  | 0.0640                                | 0.0022                 | 0.674          | 476                                               | 19                    | 423                                               | 19                    | 741                                                  | 72                    | 180                         | 125                        | a                 |
| 0.0295                             | 0.0015                 | 0.236                              | 0.037                  | 0.058                                 | 0.012                  |                | 215                                               | 30                    | 187                                               | 9                     | 531                                                  | 441                   | 168                         | 125                        | a                 |
| 0.0393                             | 0.0018                 | 0.326                              | 0.019                  | 0.0601                                | 0.0034                 | 0.856          | 286                                               | 14                    | 248                                               | 11                    | 609                                                  | 121                   | 305                         | 110                        | a                 |
| 0.0711                             | 0.0033                 | 0.662                              | 0.037                  | 0.0675                                | 0.0033                 | 0.487          | 516                                               | 23                    | 443                                               | 20                    | 854                                                  | 102                   | 165                         | 135                        | a                 |
| 0.0305                             | 0.0015                 | 0.250                              | 0.066                  | 0.059                                 | 0.021                  |                | 226                                               | 53                    | 194                                               | 10                    | 582                                                  | 764                   | 222                         | 98                         | a                 |
| 0.01096                            | 0.00055                | 0.085                              | 0.016                  | 0.056                                 | 0.015                  |                | 83                                                | 15                    | 70                                                | 3                     | 457                                                  | 578                   | 251                         | 118                        | a                 |
| 0.1017                             | 0.0053                 | 1.069                              | 0.062                  | 0.0763                                | 0.0022                 | 0.818          | 738                                               | 30                    | 624                                               | 31                    | 1103                                                 | 58                    | 155                         | 80                         | a                 |
| 0.0478                             | 0.0033                 | 0.42                               | 0.12                   | 0.064                                 | 0.019                  | 0.885          | 357                                               | 82                    | 301                                               | 20                    | 741                                                  | 623                   | 195                         | 115                        | a                 |
| 0.1380                             | 0.0076                 | 1.72                               | 0.21                   | 0.0904                                | 0.0090                 | 0.568          | 1016                                              | 78                    | 833                                               | 43                    | 1434                                                 | 189                   | 215                         | 180                        | a                 |
| 0.00912                            | 0.00046                | 0.074                              | 0.025                  | 0.059                                 | 0.027                  |                | 72                                                | 24                    | 59                                                | 3                     | 556                                                  | 1014                  | 184                         | 106                        | a                 |
| 0.1561                             | 0.0078                 | 2.18                               | 0.48                   | 0.101                                 | 0.028                  |                | 1174                                              | 153                   | 935                                               | 44                    | 1645                                                 | 509                   | 341                         | 112                        | a                 |
| 0.00799                            | 0.00045                | 0.066                              | 0.035                  | 0.060                                 | 0.036                  | 0.285          | 65                                                | 33                    | 51                                                | 3                     | 590                                                  | 1295                  | 160                         | 110                        | a                 |
| 0.0485                             | 0.0022                 | 0.475                              | 0.032                  | 0.0709                                | 0.0059                 | 0.854          | 394                                               | 22                    | 305                                               | 14                    | 956                                                  | 171                   | 190                         | 115                        | a                 |
| 0.0449                             | 0.0024                 | 0.448                              | 0.030                  | 0.0724                                | 0.0039                 | 0.895          | 376                                               | 21                    | 283                                               | 15                    | 998                                                  | 110                   | 180                         | 85                         | r                 |
| 0.0226                             | 0.0014                 | 0.213                              | 0.023                  | 0.0683                                | 0.0066                 | 0.797          | 196                                               | 19                    | 144                                               | 9                     | 878                                                  | 199                   | 135                         | 60                         | r                 |
| 0.00742                            | 0.00043                | 0.087                              | 0.033                  | 0.085                                 | 0.037                  | 0.211          | 85                                                | 31                    | 48                                                | 3                     | 1324                                                 | 839                   | 245                         | 130                        | a                 |
| 0.00503                            | 0.00032                | 0.067                              | 0.024                  | 0.097                                 | 0.058                  | *              | 66                                                | 22                    | 32                                                | 2                     | 1558                                                 | 1124                  | 165                         | 122                        | r                 |
| 0.00097                            | 0.00014                | 0.015                              | 0.011                  | 0.111                                 | 0.084                  | *              | 15                                                | 11                    | 6                                                 | 1                     | 1814                                                 | 1373                  | 140                         | 115                        | r                 |
| 0.00586                            | 0.00050                | 0.116                              | 0.021                  | 0.144                                 | 0.035                  | *              | 112                                               | 19                    | 38                                                | 3                     | 2270                                                 | 426                   | 240                         | 160                        | r                 |
| 0.00068                            | 0.00011                | 0.0268                             | 0.0070                 | 0.285                                 | 0.085                  | *              | 27                                                | 7                     | 4                                                 | 1                     | 3391                                                 | 462                   | 200                         | 80                         | r                 |
| 0.000112                           | 0.000035               | 0.0062                             | 0.0048                 | 0.40                                  | 0.30                   |                | 6                                                 | 5                     | 1                                                 | 0                     | 3909                                                 | 1131                  | 480                         | 140                        | r                 |
| 0.00124                            | 0.00095                | 0.082                              | 0.084                  | 0.48                                  | 0.26                   | *              | 80                                                | 79                    | 8                                                 | 6                     | 4180                                                 | 811                   | 200                         | 160                        | r                 |
| 0.207                              | 0.010                  | 1.95                               | 0.13                   | 0.0683                                | 0.0017                 |                | 1098                                              | 46                    | 1213                                              | 56                    | 877                                                  | 55                    | 130                         | 82                         | a                 |
| 0.1390                             | 0.0069                 | 1.142                              | 0.072                  | 0.0596                                | 0.0015                 |                | 774                                               | 34                    | 839                                               | 39                    | 590                                                  | 59                    | 122                         | 66                         | a                 |
| 0.1744                             | 0.0087                 | 1.57                               | 0.11                   | 0.0653                                | 0.0017                 |                | 959                                               | 42                    | 1036                                              | 48                    | 784                                                  | 57                    | 128                         | 91                         | a                 |
| 0.1540                             | 0.0077                 | 1.376                              | 0.088                  | 0.0648                                | 0.0016                 |                | 879                                               | 38                    | 923                                               | 43                    | 1710                                                 | 330                   | 141                         | 97                         | a                 |
| 0.1190                             | 0.0059                 | 0.978                              | 0.072                  | 0.0596                                | 0.0015                 |                | 693                                               | 37                    | 725                                               | 34                    | 590                                                  | 72                    | 144                         | 50                         | a                 |
| 0.0766                             | 0.0038                 | 0.566                              | 0.034                  | 0.0536                                | 0.0016                 |                | 455                                               | 22                    | 476                                               | 23                    | 353                                                  | 70                    | 151                         | 70                         | a                 |
| 0.1031                             | 0.0052                 | 0.817                              | 0.053                  | 0.0575                                | 0.0018                 |                | 606                                               | 29                    | 633                                               | 30                    | 509                                                  | 72                    | 153                         | 42                         | a                 |
| 0.293                              | 0.015                  | 3.84                               | 0.30                   | 0.0950                                | 0.0024                 |                | 1601                                              | 63                    | 1656                                              | 73                    | 1528                                                 | 49                    | 153                         | 70                         | a                 |

| $^{206}\text{Pb}^*/^{238}\text{U}$                       | $\pm 2\sigma$<br>(abs) | $^{207}\text{Pb}^*/^{235}\text{U}$ | $\pm 2\sigma$<br>(abs) | $^{207}\text{Pb}^*/^{206}\text{Pb}^*$ | $\pm 2\sigma$<br>(abs) | corr.<br>coef. | $^{206}\text{Pb}^*/^{238}\text{U}$<br>age<br>(Ma) | $\pm 2\sigma$<br>(Ma) | $^{207}\text{Pb}^*/^{235}\text{U}$<br>age<br>(Ma) | $\pm 2\sigma$<br>(Ma) | $^{207}\text{Pb}^*/^{206}\text{Pb}^*$<br>age<br>(Ma) | $\pm 2\sigma$<br>(Ma) | Length<br>( $\mu\text{m}$ ) | Width<br>( $\mu\text{m}$ ) | Accept/<br>Reject |
|----------------------------------------------------------|------------------------|------------------------------------|------------------------|---------------------------------------|------------------------|----------------|---------------------------------------------------|-----------------------|---------------------------------------------------|-----------------------|------------------------------------------------------|-----------------------|-----------------------------|----------------------------|-------------------|
| 0.219                                                    | 0.011                  | 2.43                               | 0.17                   | 0.0805                                | 0.0020                 |                | 1253                                              | 50                    | 1279                                              | 58                    | 1208                                                 | 52                    | 156                         | 90                         | a                 |
| 0.1074                                                   | 0.0054                 | 0.899                              | 0.057                  | 0.0607                                | 0.0018                 |                | 651                                               | 31                    | 658                                               | 31                    | 627                                                  | 68                    | 161                         | 81                         | a                 |
| 0.206                                                    | 0.010                  | 2.24                               | 0.15                   | 0.0790                                | 0.0020                 |                | 1195                                              | 48                    | 1207                                              | 55                    | 1172                                                 | 52                    | 187                         | 86                         | a                 |
| 0.204                                                    | 0.010                  | 2.21                               | 0.15                   | 0.0787                                | 0.0020                 |                | 1184                                              | 48                    | 1194                                              | 55                    | 1164                                                 | 52                    | 134                         | 91                         | a                 |
| 0.0697                                                   | 0.0035                 | 0.528                              | 0.032                  | 0.0550                                | 0.0016                 |                | 431                                               | 21                    | 434                                               | 21                    | 412                                                  | 70                    | 154                         | 50                         | a                 |
| 0.0946                                                   | 0.0047                 | 0.779                              | 0.045                  | 0.0597                                | 0.0015                 |                | 585                                               | 26                    | 582                                               | 28                    | 594                                                  | 58                    | 211                         | 102                        | a                 |
| 0.1970                                                   | 0.0099                 | 2.15                               | 0.15                   | 0.0792                                | 0.0020                 |                | 1165                                              | 48                    | 1159                                              | 53                    | 1176                                                 | 53                    | 182                         | 101                        | a                 |
| 0.0579                                                   | 0.0029                 | 0.432                              | 0.024                  | 0.0541                                | 0.0014                 |                | 365                                               | 17                    | 363                                               | 18                    | 377                                                  | 61                    | 166                         | 74                         | a                 |
| 0.1705                                                   | 0.0085                 | 1.75                               | 0.11                   | 0.0744                                | 0.0019                 |                | 1026                                              | 42                    | 1015                                              | 47                    | 1052                                                 | 52                    | 181                         | 114                        | a                 |
| 0.1278                                                   | 0.0064                 | 1.165                              | 0.071                  | 0.0662                                | 0.0017                 |                | 785                                               | 33                    | 775                                               | 37                    | 811                                                  | 56                    | 143                         | 119                        | a                 |
| 0.1804                                                   | 0.0090                 | 1.91                               | 0.13                   | 0.0769                                | 0.0020                 |                | 1085                                              | 45                    | 1069                                              | 49                    | 1118                                                 | 53                    | 188                         | 79                         | a                 |
| 0.0785                                                   | 0.0039                 | 0.638                              | 0.037                  | 0.0589                                | 0.0016                 |                | 501                                               | 23                    | 487                                               | 24                    | 563                                                  | 61                    | 169                         | 107                        | a                 |
| 0.1585                                                   | 0.0079                 | 1.65                               | 0.11                   | 0.0754                                | 0.0019                 |                | 989                                               | 41                    | 948                                               | 44                    | 1080                                                 | 52                    | 163                         | 114                        | a                 |
| 0.0336                                                   | 0.0017                 | 0.248                              | 0.017                  | 0.0536                                | 0.0021                 |                | 225                                               | 14                    | 213                                               | 10                    | 356                                                  | 94                    | 155                         | 126                        | a                 |
| 0.0393                                                   | 0.0020                 | 0.296                              | 0.023                  | 0.0547                                | 0.0025                 |                | 264                                               | 18                    | 248                                               | 12                    | 402                                                  | 112                   | 263                         | 90                         | a                 |
| 0.0485                                                   | 0.0024                 | 0.400                              | 0.024                  | 0.0597                                | 0.0019                 |                | 342                                               | 18                    | 306                                               | 15                    | 594                                                  | 71                    | 169                         | 77                         | a                 |
| 0.0366                                                   | 0.0018                 | 0.332                              | 0.023                  | 0.0657                                | 0.0027                 |                | 291                                               | 18                    | 232                                               | 11                    | 797                                                  | 90                    | 166                         | 81                         | a                 |
| 0.0549                                                   | 0.0027                 | 0.550                              | 0.033                  | 0.0727                                | 0.0019                 |                | 445                                               | 22                    | 344                                               | 17                    | 1005                                                 | 60                    | 175                         | 74                         | a                 |
| 0.0209                                                   | 0.0010                 | 0.279                              | 0.048                  | 0.097                                 | 0.012                  |                | 250                                               | 38                    | 133                                               | 7                     | 1710                                                 | 338                   | 153                         | 122                        | r                 |
| 0.1610                                                   | 0.0081                 | 5.53                               | 4.77                   | 0.249                                 | 0.098                  |                | 1906                                              | 742                   | 962                                               | 45                    | 3180                                                 | 864                   | 149                         | 53                         | r                 |
| <b>4. Solimões River, Brazil (3.8765° S, 63.6491° W)</b> |                        |                                    |                        |                                       |                        |                |                                                   |                       |                                                   |                       |                                                      |                       |                             |                            |                   |
| 0.1717                                                   | 0.0086                 | 1.733                              | 0.017                  | 0.0732                                | 0.0043                 |                | 1021                                              | 47                    | 1021                                              | 6                     | 1020                                                 | 59                    | 235                         | 165                        | a                 |
| 0.0789                                                   | 0.0039                 | 0.6281                             | 0.0024                 | 0.0577                                | 0.0027                 |                | 490                                               | 24                    | 495                                               | 1                     | 519                                                  | 52                    | 300                         | 145                        | a                 |
| 0.1820                                                   | 0.0091                 | 1.841                              | 0.020                  | 0.0734                                | 0.0043                 |                | 1078                                              | 50                    | 1060                                              | 7                     | 1024                                                 | 59                    | 230                         | 170                        | a                 |
| 0.1900                                                   | 0.0095                 | 1.982                              | 0.023                  | 0.0757                                | 0.0046                 |                | 1121                                              | 52                    | 1109                                              | 8                     | 1086                                                 | 61                    | 235                         | 120                        | a                 |
| 0.00791                                                  | 0.00040                | 0.09                               | 0.00                   | 0.079                                 | 0.010                  |                | 51                                                | 3                     | 84                                                | 0                     | 1171                                                 | 128                   | 330                         | 110                        | r                 |
| 0.1910                                                   | 0.0096                 | 2.106                              | 0.026                  | 0.0800                                | 0.0052                 |                | 1127                                              | 52                    | 1151                                              | 9                     | 1196                                                 | 64                    | 180                         | 105                        | a                 |
| 0.1708                                                   | 0.0085                 | 1.718                              | 0.017                  | 0.0730                                | 0.0042                 |                | 1016                                              | 47                    | 1015                                              | 6                     | 1013                                                 | 59                    | 245                         | 105                        | a                 |
| 0.1620                                                   | 0.0081                 | 1.612                              | 0.015                  | 0.0722                                | 0.0041                 |                | 968                                               | 45                    | 975                                               | 6                     | 991                                                  | 58                    | 185                         | 135                        | a                 |
| 0.00720                                                  | 0.00036                | 0.054                              | 0.000                  | 0.0545                                | 0.0071                 |                | 46                                                | 2                     | 53                                                | 0                     | 391                                                  | 147                   | 200                         | 80                         | a                 |
| 0.1818                                                   | 0.0091                 | 1.908                              | 0.021                  | 0.0761                                | 0.0046                 |                | 1077                                              | 50                    | 1084                                              | 7                     | 1099                                                 | 61                    | 265                         | 115                        | a                 |
| 0.00241                                                  | 0.00012                | 0.02                               | 0.00                   | 0.052                                 | 0.031                  |                | 15                                                | 1                     | 17                                                | 0                     | 281                                                  | 683                   | 280                         | 100                        | a                 |
| 0.00247                                                  | 0.00012                | 0.02                               | 0.00                   | 0.058                                 | 0.056                  |                | 16                                                | 1                     | 20                                                | 0                     | 515                                                  | 1068                  | 265                         | 130                        | a                 |
| 0.00216                                                  | 0.00011                | 0.01                               | 0.00                   | 0.041                                 | 0.011                  |                | 14                                                | 1                     | 12                                                | 0                     | -277                                                 | 335                   | 210                         | 100                        | a                 |
| 0.1755                                                   | 0.0088                 | 1.837                              | 0.020                  | 0.0759                                | 0.0046                 |                | 1042                                              | 48                    | 1059                                              | 7                     | 1093                                                 | 61                    | 460                         | 120                        | a                 |
| 0.0312                                                   | 0.0016                 | 0.22412                            | 0.00029                | 0.0521                                | 0.0022                 |                | 198                                               | 10                    | 205                                               | 0                     | 291                                                  | 48                    | 234                         | 220                        | a                 |
| 0.0404                                                   | 0.0020                 | 0.28515                            | 0.00066                | 0.0513                                | 0.0030                 |                | 255                                               | 13                    | 255                                               | 1                     | 252                                                  | 66                    | 225                         | 115                        | a                 |
| 0.0279                                                   | 0.0014                 | 0.22499                            | 0.00082                | 0.0585                                | 0.0077                 |                | 177                                               | 9                     | 206                                               | 1                     | 550                                                  | 143                   | 365                         | 135                        | a                 |
| 0.0412                                                   | 0.0021                 | 0.29903                            | 0.00066                | 0.0526                                | 0.0028                 |                | 261                                               | 13                    | 266                                               | 1                     | 311                                                  | 61                    | 240                         | 110                        | a                 |
| 0.0207                                                   | 0.0010                 | 0.17975                            | 0.00043                | 0.0629                                | 0.0073                 |                | 132                                               | 7                     | 168                                               | 0                     | 706                                                  | 123                   | 155                         | 135                        | a                 |
| 0.0272                                                   | 0.0014                 | 0.19701                            | 0.00034                | 0.0526                                | 0.0034                 |                | 173                                               | 9                     | 183                                               | 0                     | 312                                                  | 73                    | 210                         | 110                        | a                 |
| 0.1733                                                   | 0.0087                 | 1.998                              | 0.025                  | 0.0836                                | 0.0060                 |                | 1030                                              | 48                    | 1115                                              | 8                     | 1283                                                 | 70                    | 210                         | 115                        | a                 |
| 0.0860                                                   | 0.0043                 | 0.6750                             | 0.0028                 | 0.0569                                | 0.0028                 |                | 532                                               | 26                    | 524                                               | 2                     | 488                                                  | 54                    | 240                         | 115                        | a                 |
| 0.1713                                                   | 0.0086                 | 2.035                              | 0.024                  | 0.0862                                | 0.0059                 |                | 1019                                              | 47                    | 1127                                              | 8                     | 1342                                                 | 67                    | 300                         | 90                         | a                 |
| 0.250                                                    | 0.012                  | 3.245                              | 0.061                  | 0.0943                                | 0.0071                 |                | 1436                                              | 65                    | 1468                                              | 15                    | 1514                                                 | 71                    | 290                         | 135                        | a                 |
| 0.00219                                                  | 0.00011                | 0.01                               | 0.00                   | 0.043                                 | 0.021                  |                | 14                                                | 1                     | 13                                                | 0                     | -163                                                 | 610                   | 340                         | 120                        | a                 |
| 0.01147                                                  | 0.00057                | 0.19694                            | 0.00044                | 0.125                                 | 0.024                  |                | 74                                                | 4                     | 183                                               | 0                     | 2022                                                 | 172                   | 220                         | 85                         | r                 |
| 0.1364                                                   | 0.0068                 | 1.379                              | 0.011                  | 0.0733                                | 0.0044                 |                | 824                                               | 39                    | 880                                               | 5                     | 1022                                                 | 61                    | 205                         | 100                        | a                 |
| 0.0442                                                   | 0.0022                 | 0.34415                            | 0.00085                | 0.0565                                | 0.0032                 |                | 279                                               | 14                    | 300                                               | 1                     | 471                                                  | 62                    | 220                         | 160                        | a                 |
| 0.1136                                                   | 0.0057                 | 1.0017                             | 0.0061                 | 0.0639                                | 0.0034                 |                | 694                                               | 33                    | 705                                               | 3                     | 739                                                  | 56                    | 120                         | 115                        | a                 |
| 0.1671                                                   | 0.0084                 | 1.653                              | 0.016                  | 0.0717                                | 0.0041                 |                | 996                                               | 46                    | 991                                               | 6                     | 978                                                  | 58                    | 130                         | 100                        | a                 |

| $^{206}\text{Pb}^*/^{238}\text{U}$ | $\pm 2\sigma$<br>(abs) | $^{207}\text{Pb}^*/^{235}\text{U}$ | $\pm 2\sigma$<br>(abs) | $^{207}\text{Pb}^*/^{206}\text{Pb}^*$ | $\pm 2\sigma$<br>(abs) | corr.<br>coef. | $^{206}\text{Pb}^*/^{238}\text{U}$<br>age<br>(Ma) | $\pm 2\sigma$<br>(Ma) | $^{207}\text{Pb}^*/^{235}\text{U}$<br>age<br>(Ma) | $\pm 2\sigma$<br>(Ma) | $^{207}\text{Pb}^*/^{206}\text{Pb}^*$<br>age<br>(Ma) | $\pm 2\sigma$<br>(Ma) | Length<br>( $\mu\text{m}$ ) | Width<br>( $\mu\text{m}$ ) | Accept/<br>Reject |
|------------------------------------|------------------------|------------------------------------|------------------------|---------------------------------------|------------------------|----------------|---------------------------------------------------|-----------------------|---------------------------------------------------|-----------------------|------------------------------------------------------|-----------------------|-----------------------------|----------------------------|-------------------|
| 0.0257                             | 0.0013                 | 0.21244                            | 0.00054                | 0.0599                                | 0.0060                 |                | 164                                               | 8                     | 196                                               | 0                     | 600                                                  | 108                   | 215                         | 165                        | a                 |
| 0.1540                             | 0.0077                 | 1.559                              | 0.015                  | 0.0734                                | 0.0044                 |                | 923                                               | 43                    | 954                                               | 6                     | 1025                                                 | 61                    | 160                         | 125                        | a                 |
| 0.1847                             | 0.0092                 | 2.013                              | 0.025                  | 0.0791                                | 0.0053                 |                | 1092                                              | 50                    | 1120                                              | 8                     | 1174                                                 | 66                    | 300                         | 100                        | a                 |
| 0.1653                             | 0.0083                 | 1.645                              | 0.016                  | 0.0722                                | 0.0042                 |                | 986                                               | 46                    | 988                                               | 6                     | 991                                                  | 58                    | 180                         | 130                        | a                 |
| 0.1795                             | 0.0090                 | 1.889                              | 0.021                  | 0.0763                                | 0.0047                 |                | 1064                                              | 49                    | 1077                                              | 7                     | 1103                                                 | 61                    | 160                         | 155                        | a                 |
| 0.1692                             | 0.0085                 | 1.729                              | 0.017                  | 0.0741                                | 0.0044                 |                | 1008                                              | 47                    | 1019                                              | 6                     | 1044                                                 | 59                    | 155                         | 130                        | a                 |
| 0.1805                             | 0.0090                 | 1.848                              | 0.020                  | 0.0743                                | 0.0044                 |                | 1069                                              | 49                    | 1063                                              | 7                     | 1049                                                 | 60                    | 185                         | 115                        | a                 |
| 0.205                              | 0.010                  | 2.131                              | 0.026                  | 0.0753                                | 0.0045                 |                | 1204                                              | 55                    | 1159                                              | 9                     | 1076                                                 | 61                    | 300                         | 70                         | a                 |
| 0.1460                             | 0.0073                 | 1.488                              | 0.013                  | 0.0739                                | 0.0044                 |                | 878                                               | 41                    | 925                                               | 5                     | 1039                                                 | 59                    | 195                         | 110                        | a                 |
| 0.0941                             | 0.0047                 | 1.0112                             | 0.0061                 | 0.0779                                | 0.0050                 |                | 580                                               | 28                    | 709                                               | 3                     | 1145                                                 | 63                    | 205                         | 85                         | a                 |
| 0.0451                             | 0.0023                 | 0.35282                            | 0.00079                | 0.0567                                | 0.0028                 |                | 284                                               | 14                    | 307                                               | 1                     | 482                                                  | 55                    | 295                         | 80                         | a                 |
| 0.0429                             | 0.0021                 | 0.32912                            | 0.00073                | 0.0557                                | 0.0029                 |                | 271                                               | 13                    | 289                                               | 1                     | 439                                                  | 58                    | 220                         | 100                        | a                 |
| 0.1841                             | 0.0092                 | 1.923                              | 0.022                  | 0.0757                                | 0.0046                 |                | 1090                                              | 50                    | 1089                                              | 8                     | 1088                                                 | 61                    | 165                         | 125                        | a                 |
| 0.00633                            | 0.00032                | 0.06517                            | 0.00018                | 0.075                                 | 0.032                  |                | 41                                                | 2                     | 64                                                | 0                     | 1060                                                 | 437                   | 295                         | 90                         | r                 |
| 0.1763                             | 0.0088                 | 1.808                              | 0.019                  | 0.0744                                | 0.0044                 |                | 1047                                              | 48                    | 1048                                              | 7                     | 1052                                                 | 60                    | 185                         | 105                        | a                 |
| 0.1791                             | 0.0090                 | 1.876                              | 0.020                  | 0.0759                                | 0.0046                 |                | 1062                                              | 49                    | 1073                                              | 7                     | 1094                                                 | 61                    | 270                         | 100                        | a                 |
| 0.216                              | 0.011                  | 2.430                              | 0.038                  | 0.0816                                | 0.0059                 |                | 1260                                              | 57                    | 1252                                              | 11                    | 1237                                                 | 71                    | 315                         | 85                         | a                 |
| 0.1748                             | 0.0087                 | 1.779                              | 0.018                  | 0.0738                                | 0.0044                 |                | 1039                                              | 48                    | 1038                                              | 7                     | 1036                                                 | 60                    | 250                         | 100                        | a                 |
| 0.1895                             | 0.0095                 | 2.023                              | 0.024                  | 0.0774                                | 0.0049                 |                | 1118                                              | 52                    | 1123                                              | 8                     | 1133                                                 | 63                    | 240                         | 100                        | a                 |
| 0.1841                             | 0.0092                 | 1.913                              | 0.021                  | 0.0754                                | 0.0045                 |                | 1089                                              | 50                    | 1085                                              | 7                     | 1078                                                 | 60                    | 230                         | 125                        | a                 |
| 0.1937                             | 0.0097                 | 2.142                              | 0.027                  | 0.0802                                | 0.0053                 |                | 1141                                              | 53                    | 1162                                              | 9                     | 1202                                                 | 65                    | 265                         | 125                        | a                 |
| 0.1952                             | 0.0098                 | 2.017                              | 0.024                  | 0.0749                                | 0.0045                 |                | 1149                                              | 53                    | 1121                                              | 8                     | 1067                                                 | 60                    | 245                         | 90                         | a                 |
| 0.1779                             | 0.0089                 | 1.851                              | 0.020                  | 0.0755                                | 0.0046                 |                | 1055                                              | 49                    | 1064                                              | 7                     | 1081                                                 | 61                    | 150                         | 105                        | a                 |
| 0.1678                             | 0.0084                 | 1.703                              | 0.017                  | 0.0736                                | 0.0043                 |                | 1000                                              | 46                    | 1010                                              | 6                     | 1030                                                 | 60                    | 219                         | 95                         | a                 |
| 0.0411                             | 0.0021                 | 0.29763                            | 0.00082                | 0.0525                                | 0.0035                 |                | 260                                               | 13                    | 265                                               | 1                     | 309                                                  | 76                    | 335                         | 140                        | a                 |
| 0.0561                             | 0.0028                 | 0.4996                             | 0.0034                 | 0.0646                                | 0.0078                 |                | 352                                               | 17                    | 411                                               | 2                     | 761                                                  | 128                   | 255                         | 170                        | a                 |
| 0.0257                             | 0.0013                 | 0.17718                            | 0.00021                | 0.0499                                | 0.0023                 |                | 164                                               | 8                     | 166                                               | 0                     | 192                                                  | 54                    | 195                         | 100                        | a                 |
| 0.1809                             | 0.0090                 | 1.919                              | 0.021                  | 0.0769                                | 0.0047                 |                | 1072                                              | 50                    | 1088                                              | 7                     | 1120                                                 | 61                    | 243                         | 129                        | a                 |
| 0.1641                             | 0.0082                 | 1.824                              | 0.020                  | 0.0806                                | 0.0053                 |                | 980                                               | 46                    | 1054                                              | 7                     | 1212                                                 | 64                    | 226                         | 108                        | a                 |
| 0.1799                             | 0.0090                 | 1.836                              | 0.020                  | 0.0740                                | 0.0045                 |                | 1067                                              | 49                    | 1059                                              | 7                     | 1042                                                 | 61                    | 207                         | 78                         | a                 |
| 0.1721                             | 0.0086                 | 1.732                              | 0.017                  | 0.0730                                | 0.0042                 |                | 1024                                              | 48                    | 1020                                              | 6                     | 1013                                                 | 59                    | 203                         | 140                        | a                 |
| 0.1813                             | 0.0091                 | 2.073                              | 0.031                  | 0.0829                                | 0.0068                 |                | 1074                                              | 50                    | 1140                                              | 10                    | 1268                                                 | 80                    | 202                         | 92                         | a                 |
| 0.1718                             | 0.0086                 | 1.787                              | 0.019                  | 0.0755                                | 0.0046                 |                | 1022                                              | 47                    | 1041                                              | 7                     | 1081                                                 | 61                    | 129                         | 108                        | a                 |
| 0.1010                             | 0.0051                 | 0.9218                             | 0.0052                 | 0.0662                                | 0.0037                 |                | 620                                               | 30                    | 663                                               | 3                     | 812                                                  | 59                    | 192                         | 89                         | a                 |
| 0.1892                             | 0.0095                 | 2.070                              | 0.027                  | 0.0793                                | 0.0054                 |                | 1117                                              | 51                    | 1139                                              | 9                     | 1180                                                 | 67                    | 189                         | 107                        | a                 |
| 0.1761                             | 0.0088                 | 1.802                              | 0.019                  | 0.0742                                | 0.0044                 |                | 1046                                              | 48                    | 1046                                              | 7                     | 1047                                                 | 60                    | 196                         | 106                        | a                 |
| 0.1832                             | 0.0092                 | 1.968                              | 0.022                  | 0.0779                                | 0.0048                 |                | 1084                                              | 50                    | 1105                                              | 8                     | 1145                                                 | 62                    | 122                         | 103                        | a                 |
| 0.283                              | 0.014                  | 4.21                               | 0.10                   | 0.1079                                | 0.0093                 |                | 1606                                              | 71                    | 1676                                              | 20                    | 1764                                                 | 78                    | 199                         | 82                         | a                 |
| 0.0404                             | 0.0020                 | 0.36222                            | 0.00094                | 0.0650                                | 0.0042                 |                | 255                                               | 13                    | 314                                               | 1                     | 775                                                  | 67                    | 172                         | 124                        | a                 |
| 0.1765                             | 0.0088                 | 1.854                              | 0.020                  | 0.0762                                | 0.0046                 |                | 1048                                              | 49                    | 1065                                              | 7                     | 1100                                                 | 61                    | 134                         | 114                        | a                 |
| 0.0365                             | 0.0018                 | 0.31069                            | 0.00076                | 0.0618                                | 0.0041                 |                | 231                                               | 11                    | 275                                               | 1                     | 668                                                  | 72                    | 226                         | 74                         | a                 |
| 0.0441                             | 0.0022                 | 0.5180                             | 0.0016                 | 0.0851                                | 0.0060                 |                | 278                                               | 14                    | 424                                               | 1                     | 1318                                                 | 68                    | 195                         | 82                         | r                 |
| 0.1839                             | 0.0092                 | 1.915                              | 0.021                  | 0.0755                                | 0.0045                 |                | 1088                                              | 50                    | 1086                                              | 7                     | 1083                                                 | 60                    | 188                         | 80                         | a                 |
| 0.1953                             | 0.0098                 | 2.066                              | 0.025                  | 0.0768                                | 0.0047                 |                | 1150                                              | 53                    | 1138                                              | 8                     | 1115                                                 | 61                    | 120                         | 85                         | a                 |
| 0.0569                             | 0.0028                 | 0.4250                             | 0.0013                 | 0.0542                                | 0.0028                 |                | 357                                               | 17                    | 360                                               | 1                     | 377                                                  | 59                    | 203                         | 85                         | a                 |
| 0.202                              | 0.010                  | 2.231                              | 0.029                  | 0.0803                                | 0.0051                 |                | 1184                                              | 54                    | 1191                                              | 9                     | 1203                                                 | 63                    | 172                         | 104                        | a                 |
| 0.0785                             | 0.0039                 | 0.6137                             | 0.0022                 | 0.0567                                | 0.0026                 |                | 487                                               | 23                    | 486                                               | 1                     | 481                                                  | 50                    | 133                         | 128                        | a                 |
| 0.0647                             | 0.0032                 | 0.7069                             | 0.0036                 | 0.0792                                | 0.0063                 |                | 404                                               | 20                    | 543                                               | 2                     | 1177                                                 | 78                    | 156                         | 87                         | r                 |
| 0.0812                             | 0.0041                 | 0.6471                             | 0.0025                 | 0.0578                                | 0.0027                 |                | 504                                               | 24                    | 507                                               | 2                     | 521                                                  | 51                    | 171                         | 73                         | a                 |
| 0.203                              | 0.010                  | 2.148                              | 0.027                  | 0.0768                                | 0.0047                 |                | 1190                                              | 55                    | 1164                                              | 9                     | 1117                                                 | 61                    | 136                         | 116                        | a                 |
| 0.1998                             | 0.0100                 | 2.257                              | 0.032                  | 0.0819                                | 0.0058                 |                | 1174                                              | 54                    | 1199                                              | 10                    | 1244                                                 | 70                    | 172                         | 71                         | a                 |

| $^{206}\text{Pb}^*/^{238}\text{U}$ | $\pm 2\sigma$<br>(abs) | $^{207}\text{Pb}^*/^{235}\text{U}$ | $\pm 2\sigma$<br>(abs) | $^{207}\text{Pb}^*/^{206}\text{Pb}^*$ | $\pm 2\sigma$<br>(abs) | corr.<br>coef. | $^{206}\text{Pb}^*/^{238}\text{U}$<br>age<br>(Ma) | $\pm 2\sigma$<br>(Ma) | $^{207}\text{Pb}^*/^{235}\text{U}$<br>age<br>(Ma) | $\pm 2\sigma$<br>(Ma) | $^{207}\text{Pb}^*/^{206}\text{Pb}^*$<br>age<br>(Ma) | $\pm 2\sigma$<br>(Ma) | Length<br>( $\mu\text{m}$ ) | Width<br>( $\mu\text{m}$ ) | Accept/<br>Reject |
|------------------------------------|------------------------|------------------------------------|------------------------|---------------------------------------|------------------------|----------------|---------------------------------------------------|-----------------------|---------------------------------------------------|-----------------------|------------------------------------------------------|-----------------------|-----------------------------|----------------------------|-------------------|
| 0.1955                             | 0.0098                 | 2.072                              | 0.025                  | 0.0769                                | 0.0047                 |                | 1151                                              | 53                    | 1139                                              | 8                     | 1117                                                 | 61                    | 145                         | 90                         | a                 |
| 0.1917                             | 0.0096                 | 1.964                              | 0.022                  | 0.0743                                | 0.0044                 |                | 1131                                              | 52                    | 1103                                              | 8                     | 1049                                                 | 60                    | 131                         | 47                         | a                 |
| 0.1738                             | 0.0087                 | 1.821                              | 0.020                  | 0.0760                                | 0.0048                 |                | 1033                                              | 48                    | 1053                                              | 7                     | 1094                                                 | 63                    | 162                         | 136                        | a                 |
| 0.219                              | 0.011                  | 2.511                              | 0.049                  | 0.0832                                | 0.0074                 |                | 1276                                              | 58                    | 1275                                              | 14                    | 1273                                                 | 87                    | 187                         | 110                        | a                 |
| 0.0930                             | 0.0046                 | 0.7896                             | 0.0038                 | 0.0616                                | 0.0032                 |                | 573                                               | 27                    | 591                                               | 2                     | 660                                                  | 56                    | 175                         | 128                        | a                 |
| 0.234                              | 0.012                  | 2.935                              | 0.050                  | 0.0909                                | 0.0066                 |                | 1356                                              | 61                    | 1391                                              | 13                    | 1445                                                 | 69                    | 169                         | 119                        | a                 |
| 0.1765                             | 0.0088                 | 1.821                              | 0.019                  | 0.0748                                | 0.0045                 |                | 1048                                              | 49                    | 1053                                              | 7                     | 1064                                                 | 60                    | 169                         | 112                        | a                 |
| 0.1750                             | 0.0087                 | 1.799                              | 0.019                  | 0.0746                                | 0.0045                 |                | 1039                                              | 48                    | 1045                                              | 7                     | 1057                                                 | 60                    | 177                         | 137                        | a                 |
| 0.0459                             | 0.0023                 | 0.6829                             | 0.0049                 | 0.108                                 | 0.017                  |                | 290                                               | 14                    | 529                                               | 3                     | 1763                                                 | 143                   | 292                         | 73                         | r                 |
| 0.1778                             | 0.0089                 | 1.847                              | 0.020                  | 0.0753                                | 0.0045                 |                | 1055                                              | 49                    | 1062                                              | 7                     | 1077                                                 | 61                    | 256                         | 122                        | a                 |
| 0.1533                             | 0.0077                 | 1.810                              | 0.019                  | 0.0856                                | 0.0058                 |                | 919                                               | 43                    | 1049                                              | 7                     | 1330                                                 | 66                    | 146                         | 112                        | a                 |
| 0.1823                             | 0.0091                 | 1.898                              | 0.021                  | 0.0755                                | 0.0045                 |                | 1079                                              | 50                    | 1080                                              | 7                     | 1082                                                 | 60                    | 133                         | 112                        | a                 |
| 0.0454                             | 0.0023                 | 0.35345                            | 0.00088                | 0.0565                                | 0.0031                 |                | 286                                               | 14                    | 307                                               | 1                     | 472                                                  | 60                    | 240                         | 76                         | a                 |
| 0.0527                             | 0.0026                 | 0.4697                             | 0.0017                 | 0.0647                                | 0.0044                 |                | 331                                               | 16                    | 391                                               | 1                     | 763                                                  | 71                    | 170                         | 104                        | a                 |
| 0.0245                             | 0.0012                 | 0.18449                            | 0.00051                | 0.0545                                | 0.0062                 |                | 156                                               | 8                     | 172                                               | 0                     | 394                                                  | 127                   | 153                         | 112                        | a                 |
| 0.1109                             | 0.0055                 | 1.0635                             | 0.0078                 | 0.0696                                | 0.0046                 |                | 678                                               | 32                    | 736                                               | 4                     | 916                                                  | 68                    | 129                         | 96                         | a                 |
| 0.0410                             | 0.0021                 | 0.32271                            | 0.00079                | 0.0570                                | 0.0034                 |                | 259                                               | 13                    | 284                                               | 1                     | 493                                                  | 66                    | 232                         | 83                         | a                 |
| 0.0943                             | 0.0047                 | 0.7584                             | 0.0035                 | 0.0583                                | 0.0028                 |                | 581                                               | 28                    | 573                                               | 2                     | 542                                                  | 53                    | 217                         | 78                         | a                 |
| 0.207                              | 0.010                  | 2.141                              | 0.028                  | 0.0752                                | 0.0048                 |                | 1211                                              | 55                    | 1162                                              | 9                     | 1073                                                 | 64                    | 83                          | 40                         | a                 |
| 0.0515                             | 0.0026                 | 0.4392                             | 0.0024                 | 0.0619                                | 0.0066                 |                | 324                                               | 16                    | 370                                               | 2                     | 670                                                  | 114                   | 154                         | 107                        | a                 |
| 0.0439                             | 0.0022                 | 0.32640                            | 0.00061                | 0.0540                                | 0.0023                 |                | 277                                               | 14                    | 287                                               | 0                     | 370                                                  | 48                    | 131                         | 110                        | a                 |
| 0.1823                             | 0.0091                 | 1.999                              | 0.019                  | 0.0795                                | 0.0040                 |                | 1080                                              | 50                    | 1115                                              | 6                     | 1185                                                 | 50                    | 189                         | 96                         | a                 |
| 0.345                              | 0.017                  | 5.37                               | 0.13                   | 0.1129                                | 0.0081                 |                | 1910                                              | 83                    | 1880                                              | 21                    | 1847                                                 | 65                    | 154                         | 115                        | a                 |
| 0.1913                             | 0.0096                 | 1.995                              | 0.018                  | 0.0756                                | 0.0036                 |                | 1129                                              | 52                    | 1114                                              | 6                     | 1086                                                 | 48                    | 168                         | 99                         | a                 |
| 0.1023                             | 0.0051                 | 0.8389                             | 0.0033                 | 0.0595                                | 0.0023                 |                | 628                                               | 30                    | 619                                               | 2                     | 585                                                  | 41                    | 142                         | 135                        | a                 |
| 0.0667                             | 0.0033                 | 0.6058                             | 0.0032                 | 0.0659                                | 0.0053                 |                | 416                                               | 20                    | 481                                               | 2                     | 803                                                  | 84                    | 197                         | 134                        | a                 |
| 0.0516                             | 0.0026                 | 0.38770                            | 0.00091                | 0.0545                                | 0.0025                 |                | 324                                               | 16                    | 333                                               | 1                     | 391                                                  | 51                    | 154                         | 126                        | a                 |
| 0.0651                             | 0.0033                 | 0.5450                             | 0.0017                 | 0.0607                                | 0.0029                 |                | 407                                               | 20                    | 442                                               | 1                     | 628                                                  | 51                    | 180                         | 105                        | a                 |
| 0.0244                             | 0.0012                 | 0.23913                            | 0.00085                | 0.071                                 | 0.010                  |                | 156                                               | 8                     | 218                                               | 1                     | 957                                                  | 149                   | 128                         | 98                         | r                 |
| 0.1652                             | 0.0083                 | 2.369                              | 0.027                  | 0.1040                                | 0.0073                 |                | 986                                               | 46                    | 1233                                              | 8                     | 1697                                                 | 64                    | 141                         | 69                         | a                 |
| 0.1905                             | 0.0095                 | 1.997                              | 0.019                  | 0.0760                                | 0.0037                 |                | 1124                                              | 52                    | 1114                                              | 6                     | 1096                                                 | 49                    | 240                         | 77                         | a                 |
| 0.0248                             | 0.0012                 | 0.17647                            | 0.00021                | 0.0517                                | 0.0025                 |                | 158                                               | 8                     | 165                                               | 0                     | 271                                                  | 56                    | 440                         | 100                        | a                 |
| 0.0533                             | 0.0027                 | 0.4298                             | 0.0014                 | 0.0585                                | 0.0037                 |                | 335                                               | 16                    | 363                                               | 1                     | 548                                                  | 69                    | 141                         | 101                        | a                 |
| 0.0951                             | 0.0048                 | 0.7368                             | 0.0025                 | 0.0562                                | 0.0020                 |                | 586                                               | 28                    | 561                                               | 1                     | 460                                                  | 40                    | 149                         | 72                         | a                 |
| 0.1617                             | 0.0081                 | 1.799                              | 0.016                  | 0.0807                                | 0.0043                 |                | 966                                               | 45                    | 1045                                              | 6                     | 1214                                                 | 53                    | 185                         | 70                         | a                 |
| 0.0410                             | 0.0020                 | 0.33166                            | 0.00081                | 0.0587                                | 0.0035                 |                | 259                                               | 13                    | 291                                               | 1                     | 556                                                  | 65                    | 220                         | 102                        | a                 |
| 0.0440                             | 0.0022                 | 0.34785                            | 0.00079                | 0.0574                                | 0.0030                 |                | 277                                               | 14                    | 303                                               | 1                     | 507                                                  | 57                    | 142                         | 64                         | a                 |
| 0.204                              | 0.010                  | 2.376                              | 0.027                  | 0.0844                                | 0.0047                 |                | 1198                                              | 55                    | 1235                                              | 8                     | 1302                                                 | 54                    | 148                         | 116                        | a                 |
| 0.0426                             | 0.0021                 | 0.37806                            | 0.00069                | 0.0644                                | 0.0028                 |                | 269                                               | 13                    | 326                                               | 1                     | 756                                                  | 45                    | 190                         | 140                        | a                 |
| 0.0459                             | 0.0023                 | 0.33840                            | 0.00056                | 0.0535                                | 0.0019                 |                | 289                                               | 14                    | 296                                               | 0                     | 350                                                  | 41                    | 175                         | 80                         | a                 |
| 0.0739                             | 0.0037                 | 0.5853                             | 0.0016                 | 0.0575                                | 0.0022                 |                | 459                                               | 22                    | 468                                               | 1                     | 509                                                  | 42                    | 109                         | 92                         | a                 |
| 0.1823                             | 0.0091                 | 1.836                              | 0.017                  | 0.0730                                | 0.0036                 |                | 1079                                              | 50                    | 1058                                              | 6                     | 1015                                                 | 50                    | 119                         | 115                        | a                 |
| 0.0407                             | 0.0020                 | 0.28255                            | 0.00042                | 0.0503                                | 0.0018                 |                | 257                                               | 13                    | 253                                               | 0                     | 209                                                  | 42                    | 169                         | 124                        | a                 |
| 0.0309                             | 0.0015                 | 0.33326                            | 0.00092                | 0.0783                                | 0.0070                 |                | 196                                               | 10                    | 292                                               | 1                     | 1155                                                 | 89                    | 338                         | 106                        | r                 |
| 0.0262                             | 0.0013                 | 0.19175                            | 0.00034                | 0.0532                                | 0.0036                 |                | 166                                               | 8                     | 178                                               | 0                     | 336                                                  | 77                    | 361                         | 98                         | a                 |
| 0.1753                             | 0.0088                 | 1.793                              | 0.015                  | 0.0742                                | 0.0035                 |                | 1041                                              | 48                    | 1043                                              | 5                     | 1046                                                 | 47                    | 164                         | 119                        | a                 |
| 0.01753                            | 0.00088                | 0.10895                            | 0.00025                | 0.0451                                | 0.0060                 |                | 112                                               | 6                     | 105                                               | 0                     | -52                                                  | 162                   | 156                         | 106                        | a                 |
| 0.1775                             | 0.0089                 | 1.845                              | 0.016                  | 0.0754                                | 0.0036                 |                | 1053                                              | 49                    | 1062                                              | 6                     | 1080                                                 | 48                    | 227                         | 130                        | a                 |
| 0.1839                             | 0.0092                 | 2.059                              | 0.024                  | 0.0812                                | 0.0051                 |                | 1088                                              | 50                    | 1135                                              | 8                     | 1227                                                 | 61                    | 120                         | 63                         | a                 |
| 0.1788                             | 0.0089                 | 1.824                              | 0.015                  | 0.0740                                | 0.0035                 |                | 1060                                              | 49                    | 1054                                              | 6                     | 1041                                                 | 47                    | 175                         | 113                        | a                 |
| 0.202                              | 0.010                  | 2.141                              | 0.021                  | 0.0769                                | 0.0038                 |                | 1185                                              | 54                    | 1162                                              | 7                     | 1119                                                 | 49                    | 151                         | 111                        | a                 |

| $^{206}\text{Pb}^*/^{238}\text{U}$ | $\pm 2\sigma$<br>(abs) | $^{207}\text{Pb}^*/^{235}\text{U}$ | $\pm 2\sigma$<br>(abs) | $^{207}\text{Pb}^*/^{206}\text{Pb}^*$ | $\pm 2\sigma$<br>(abs) | corr.<br>coef. | $^{206}\text{Pb}^*/^{238}\text{U}$<br>age<br>(Ma) | $\pm 2\sigma$<br>(Ma) | $^{207}\text{Pb}^*/^{235}\text{U}$<br>age<br>(Ma) | $\pm 2\sigma$<br>(Ma) | $^{207}\text{Pb}^*/^{206}\text{Pb}^*$<br>age<br>(Ma) | $\pm 2\sigma$<br>(Ma) | Length<br>( $\mu\text{m}$ ) | Width<br>( $\mu\text{m}$ ) | Accept/<br>Reject |
|------------------------------------|------------------------|------------------------------------|------------------------|---------------------------------------|------------------------|----------------|---------------------------------------------------|-----------------------|---------------------------------------------------|-----------------------|------------------------------------------------------|-----------------------|-----------------------------|----------------------------|-------------------|
| 0.1940                             | 0.0097                 | 1.994                              | 0.019                  | 0.0745                                | 0.0036                 |                | 1143                                              | 53                    | 1113                                              | 6                     | 1056                                                 | 49                    | 185                         | 150                        | a                 |
| 0.1999                             | 0.0100                 | 2.105                              | 0.021                  | 0.0764                                | 0.0037                 |                | 1175                                              | 54                    | 1151                                              | 7                     | 1106                                                 | 49                    | 220                         | 95                         | a                 |
| 0.1731                             | 0.0087                 | 1.685                              | 0.013                  | 0.0706                                | 0.0032                 |                | 1029                                              | 48                    | 1003                                              | 5                     | 945                                                  | 46                    | 110                         | 80                         | a                 |
| 0.1884                             | 0.0094                 | 2.146                              | 0.028                  | 0.0826                                | 0.0056                 |                | 1113                                              | 51                    | 1164                                              | 9                     | 1260                                                 | 67                    | 150                         | 145                        | a                 |
| 0.1879                             | 0.0094                 | 1.969                              | 0.019                  | 0.0760                                | 0.0039                 |                | 1110                                              | 51                    | 1105                                              | 6                     | 1094                                                 | 51                    | 120                         | 80                         | a                 |
| 0.0294                             | 0.0015                 | 0.24377                            | 0.00040                | 0.0601                                | 0.0033                 |                | 187                                               | 9                     | 222                                               | 0                     | 608                                                  | 60                    | 140                         | 90                         | a                 |
| 0.0306                             | 0.0015                 | 0.22150                            | 0.00025                | 0.0524                                | 0.0019                 |                | 195                                               | 10                    | 203                                               | 0                     | 304                                                  | 42                    | 125                         | 85                         | a                 |
| 0.1785                             | 0.0089                 | 1.766                              | 0.014                  | 0.0717                                | 0.0033                 |                | 1059                                              | 49                    | 1033                                              | 5                     | 978                                                  | 47                    | 165                         | 95                         | a                 |
| 0.1843                             | 0.0092                 | 1.867                              | 0.016                  | 0.0734                                | 0.0035                 |                | 1091                                              | 50                    | 1069                                              | 6                     | 1026                                                 | 48                    | 205                         | 95                         | a                 |
| 0.1672                             | 0.0084                 | 1.921                              | 0.021                  | 0.0833                                | 0.0053                 |                | 997                                               | 46                    | 1088                                              | 7                     | 1277                                                 | 62                    | 140                         | 75                         | a                 |
| 0.0498                             | 0.0025                 | 0.4209                             | 0.0011                 | 0.0613                                | 0.0032                 |                | 313                                               | 15                    | 357                                               | 1                     | 649                                                  | 55                    | 100                         | 80                         | a                 |
| 0.0366                             | 0.0018                 | 0.26960                            | 0.00050                | 0.0534                                | 0.0027                 |                | 232                                               | 11                    | 242                                               | 0                     | 348                                                  | 57                    | 230                         | 80                         | a                 |
| 0.1705                             | 0.0085                 | 1.700                              | 0.013                  | 0.0723                                | 0.0033                 |                | 1015                                              | 47                    | 1009                                              | 5                     | 995                                                  | 47                    | 145                         | 120                        | a                 |
| 0.339                              | 0.017                  | 5.43                               | 0.14                   | 0.1163                                | 0.0087                 |                | 1881                                              | 82                    | 1890                                              | 22                    | 1900                                                 | 67                    | 155                         | 95                         | a                 |
| 0.239                              | 0.012                  | 2.823                              | 0.037                  | 0.0857                                | 0.0047                 |                | 1381                                              | 62                    | 1362                                              | 10                    | 1331                                                 | 53                    | 140                         | 95                         | a                 |
| 0.1919                             | 0.0096                 | 2.059                              | 0.020                  | 0.0778                                | 0.0039                 |                | 1132                                              | 52                    | 1135                                              | 7                     | 1142                                                 | 49                    | 140                         | 120                        | a                 |
| 0.1752                             | 0.0088                 | 1.778                              | 0.015                  | 0.0736                                | 0.0034                 |                | 1041                                              | 48                    | 1037                                              | 5                     | 1031                                                 | 47                    | 125                         | 110                        | a                 |
| 0.211                              | 0.011                  | 2.643                              | 0.033                  | 0.0909                                | 0.0054                 |                | 1233                                              | 56                    | 1313                                              | 9                     | 1445                                                 | 57                    | 150                         | 80                         | a                 |
| 0.242                              | 0.012                  | 2.551                              | 0.032                  | 0.0766                                | 0.0040                 |                | 1395                                              | 63                    | 1287                                              | 9                     | 1110                                                 | 52                    | 240                         | 90                         | a                 |
| 0.0627                             | 0.0031                 | 0.4503                             | 0.0010                 | 0.0521                                | 0.0018                 |                | 392                                               | 19                    | 377                                               | 1                     | 289                                                  | 40                    | 210                         | 70                         | a                 |
| 0.0461                             | 0.0023                 | 0.3790                             | 0.0015                 | 0.0597                                | 0.0050                 |                | 290                                               | 14                    | 326                                               | 1                     | 592                                                  | 91                    | 260                         | 105                        | a                 |
| 0.0427                             | 0.0021                 | 0.31651                            | 0.00065                | 0.0537                                | 0.0026                 |                | 270                                               | 13                    | 279                                               | 0                     | 359                                                  | 54                    | 295                         | 130                        | a                 |
| 0.1334                             | 0.0067                 | 1.0911                             | 0.0085                 | 0.0593                                | 0.0035                 |                | 807                                               | 38                    | 749                                               | 4                     | 579                                                  | 63                    | 155                         | 85                         | a                 |
| 0.1845                             | 0.0092                 | 1.867                              | 0.016                  | 0.0734                                | 0.0034                 |                | 1091                                              | 50                    | 1070                                              | 6                     | 1026                                                 | 47                    | 205                         | 115                        | a                 |
| 0.1385                             | 0.0069                 | 1.2194                             | 0.0080                 | 0.0639                                | 0.0030                 |                | 836                                               | 39                    | 809                                               | 4                     | 737                                                  | 50                    | 175                         | 60                         | a                 |
| 0.1732                             | 0.0087                 | 1.709                              | 0.014                  | 0.0716                                | 0.0034                 |                | 1030                                              | 48                    | 1012                                              | 5                     | 974                                                  | 49                    | 280                         | 115                        | a                 |
| 0.1669                             | 0.0083                 | 1.668                              | 0.013                  | 0.0725                                | 0.0033                 |                | 995                                               | 46                    | 996                                               | 5                     | 1000                                                 | 47                    | 175                         | 125                        | a                 |
| 0.1425                             | 0.0071                 | 1.4152                             | 0.0095                 | 0.0720                                | 0.0034                 |                | 859                                               | 40                    | 895                                               | 4                     | 987                                                  | 48                    | 285                         | 85                         | a                 |
| 0.1413                             | 0.0071                 | 1.387                              | 0.012                  | 0.0712                                | 0.0044                 |                | 852                                               | 40                    | 883                                               | 5                     | 962                                                  | 63                    | 120                         | 95                         | a                 |
| 0.00678                            | 0.00034                | 0.09                               | 0.00                   | 0.0922                                | 0.0096                 |                | 44                                                | 2                     | 84                                                | 0                     | 1471                                                 | 99                    | 235                         | 95                         | r                 |
| 0.0505                             | 0.0025                 | 0.5678                             | 0.0022                 | 0.0816                                | 0.0062                 |                | 317                                               | 16                    | 457                                               | 1                     | 1236                                                 | 75                    | 200                         | 90                         | r                 |
| 0.1157                             | 0.0058                 | 0.9700                             | 0.0061                 | 0.0608                                | 0.0033                 |                | 706                                               | 34                    | 688                                               | 3                     | 633                                                  | 59                    | 175                         | 125                        | a                 |
| 0.01941                            | 0.00097                | 0.13555                            | 0.00041                | 0.0507                                | 0.0080                 |                | 124                                               | 6                     | 129                                               | 0                     | 225                                                  | 182                   | 275                         | 100                        | a                 |
| 0.1999                             | 0.0100                 | 2.074                              | 0.020                  | 0.0752                                | 0.0036                 |                | 1175                                              | 54                    | 1140                                              | 7                     | 1075                                                 | 48                    | 275                         | 95                         | a                 |
| 0.273                              | 0.014                  | 3.730                              | 0.064                  | 0.0990                                | 0.0062                 |                | 1557                                              | 70                    | 1578                                              | 14                    | 1606                                                 | 59                    | 175                         | 100                        | a                 |
| 0.01527                            | 0.00076                | 0.16073                            | 0.00029                | 0.0763                                | 0.0090                 |                | 98                                                | 5                     | 151                                               | 0                     | 1104                                                 | 117                   | 165                         | 75                         | r                 |
| 0.255                              | 0.013                  | 3.180                              | 0.047                  | 0.0906                                | 0.0052                 |                | 1462                                              | 66                    | 1452                                              | 11                    | 1438                                                 | 55                    | 155                         | 100                        | a                 |
| 0.1622                             | 0.0081                 | 1.547                              | 0.011                  | 0.0692                                | 0.0031                 |                | 969                                               | 45                    | 949                                               | 5                     | 904                                                  | 46                    | 160                         | 140                        | a                 |
| 0.317                              | 0.016                  | 4.74                               | 0.10                   | 0.1087                                | 0.0075                 |                | 1773                                              | 78                    | 1775                                              | 19                    | 1778                                                 | 63                    | 180                         | 90                         | a                 |
| 0.1267                             | 0.0063                 | 1.2681                             | 0.0090                 | 0.0726                                | 0.0041                 |                | 769                                               | 36                    | 832                                               | 4                     | 1003                                                 | 57                    | 205                         | 55                         | a                 |
| 0.1945                             | 0.0097                 | 2.601                              | 0.046                  | 0.0970                                | 0.0088                 |                | 1146                                              | 53                    | 1301                                              | 13                    | 1567                                                 | 85                    | 165                         | 65                         | a                 |
| 0.1186                             | 0.0059                 | 1.0489                             | 0.0057                 | 0.0641                                | 0.0029                 |                | 723                                               | 34                    | 728                                               | 3                     | 746                                                  | 48                    | 170                         | 100                        | a                 |
| 0.254                              | 0.013                  | 3.309                              | 0.051                  | 0.0946                                | 0.0057                 |                | 1457                                              | 66                    | 1483                                              | 12                    | 1520                                                 | 57                    | 150                         | 50                         | a                 |
| 0.215                              | 0.011                  | 2.185                              | 0.022                  | 0.0738                                | 0.0035                 |                | 1254                                              | 57                    | 1176                                              | 7                     | 1036                                                 | 47                    | 155                         | 85                         | a                 |
| 0.203                              | 0.010                  | 2.113                              | 0.021                  | 0.0756                                | 0.0036                 |                | 1190                                              | 55                    | 1153                                              | 7                     | 1084                                                 | 48                    | 135                         | 100                        | a                 |
| 0.0535                             | 0.0027                 | 0.4702                             | 0.0011                 | 0.0638                                | 0.0028                 |                | 336                                               | 16                    | 391                                               | 1                     | 733                                                  | 46                    | 165                         | 95                         | a                 |
| 0.1464                             | 0.0073                 | 1.4120                             | 0.0093                 | 0.0700                                | 0.0031                 |                | 881                                               | 41                    | 894                                               | 4                     | 927                                                  | 46                    | 180                         | 65                         | a                 |
| 0.1949                             | 0.0097                 | 1.980                              | 0.018                  | 0.0737                                | 0.0035                 |                | 1148                                              | 53                    | 1109                                              | 6                     | 1033                                                 | 48                    | 135                         | 100                        | a                 |
| 0.210                              | 0.011                  | 2.188                              | 0.026                  | 0.0755                                | 0.0043                 |                | 1229                                              | 56                    | 1177                                              | 8                     | 1083                                                 | 58                    | 300                         | 85                         | a                 |
| 0.209                              | 0.010                  | 2.240                              | 0.023                  | 0.0778                                | 0.0039                 |                | 1222                                              | 56                    | 1194                                              | 7                     | 1142                                                 | 50                    | 120                         | 70                         | a                 |
| 0.0530                             | 0.0027                 | 0.4078                             | 0.0011                 | 0.0558                                | 0.0027                 |                | 333                                               | 16                    | 347                                               | 1                     | 444                                                  | 54                    | 160                         | 65                         | a                 |

| $^{206}\text{Pb}^*/^{238}\text{U}$                     | $\pm 2\sigma$<br>(abs) | $^{207}\text{Pb}^*/^{235}\text{U}$ | $\pm 2\sigma$<br>(abs) | $^{207}\text{Pb}^*/^{206}\text{Pb}^*$ | $\pm 2\sigma$<br>(abs) | corr.<br>coef. | $^{206}\text{Pb}^*/^{238}\text{U}$<br>age<br>(Ma) | $\pm 2\sigma$<br>(Ma) | $^{207}\text{Pb}^*/^{235}\text{U}$<br>age<br>(Ma) | $\pm 2\sigma$<br>(Ma) | $^{207}\text{Pb}^*/^{206}\text{Pb}^*$<br>age<br>(Ma) | $\pm 2\sigma$<br>(Ma) | Length<br>( $\mu\text{m}$ ) | Width<br>( $\mu\text{m}$ ) | Accept/<br>Reject |
|--------------------------------------------------------|------------------------|------------------------------------|------------------------|---------------------------------------|------------------------|----------------|---------------------------------------------------|-----------------------|---------------------------------------------------|-----------------------|------------------------------------------------------|-----------------------|-----------------------------|----------------------------|-------------------|
| 0.1555                                                 | 0.0078                 | 1.554                              | 0.011                  | 0.0725                                | 0.0033                 |                | 932                                               | 44                    | 952                                               | 4                     | 1000                                                 | 47                    | 165                         | 125                        | a                 |
| 0.257                                                  | 0.013                  | 2.769                              | 0.035                  | 0.0782                                | 0.0039                 |                | 1474                                              | 66                    | 1347                                              | 10                    | 1152                                                 | 49                    | 165                         | 90                         | a                 |
| 0.1752                                                 | 0.0088                 | 1.777                              | 0.017                  | 0.0736                                | 0.0040                 |                | 1041                                              | 48                    | 1037                                              | 6                     | 1030                                                 | 55                    | 240                         | 100                        | a                 |
| 0.0480                                                 | 0.0024                 | 0.3718                             | 0.0014                 | 0.0562                                | 0.0045                 |                | 302                                               | 15                    | 321                                               | 1                     | 461                                                  | 88                    | 370                         | 90                         | a                 |
| 0.1793                                                 | 0.0090                 | 1.860                              | 0.016                  | 0.0753                                | 0.0036                 |                | 1063                                              | 49                    | 1067                                              | 6                     | 1076                                                 | 49                    | 135                         | 95                         | a                 |
| 0.0473                                                 | 0.0024                 | 0.7680                             | 0.0029                 | 0.1177                                | 0.0093                 |                | 298                                               | 15                    | 579                                               | 2                     | 1921                                                 | 71                    | 300                         | 85                         | r                 |
| 0.1988                                                 | 0.0099                 | 2.014                              | 0.019                  | 0.0735                                | 0.0035                 |                | 1169                                              | 54                    | 1120                                              | 7                     | 1026                                                 | 49                    | 160                         | 95                         | a                 |
| 0.0522                                                 | 0.0026                 | 0.4511                             | 0.0018                 | 0.0627                                | 0.0049                 |                | 328                                               | 16                    | 378                                               | 1                     | 699                                                  | 83                    | 240                         | 75                         | a                 |
| 0.0440                                                 | 0.0022                 | 0.33379                            | 0.00069                | 0.0550                                | 0.0026                 |                | 278                                               | 14                    | 292                                               | 1                     | 414                                                  | 52                    | 195                         | 95                         | a                 |
| 0.206                                                  | 0.010                  | 2.166                              | 0.022                  | 0.0762                                | 0.0037                 |                | 1209                                              | 55                    | 1170                                              | 7                     | 1099                                                 | 48                    | 220                         | 80                         | a                 |
| 0.1863                                                 | 0.0093                 | 1.895                              | 0.017                  | 0.0738                                | 0.0035                 |                | 1101                                              | 51                    | 1079                                              | 6                     | 1035                                                 | 47                    | 125                         | 75                         | a                 |
| 0.1692                                                 | 0.0085                 | 1.710                              | 0.014                  | 0.0733                                | 0.0035                 |                | 1008                                              | 47                    | 1012                                              | 5                     | 1022                                                 | 49                    | 240                         | 135                        | a                 |
| 0.202                                                  | 0.010                  | 2.093                              | 0.021                  | 0.0752                                | 0.0037                 |                | 1186                                              | 54                    | 1147                                              | 7                     | 1073                                                 | 49                    | 148                         | 95                         | a                 |
| 0.0253                                                 | 0.0013                 | 0.20946                            | 0.00064                | 0.0600                                | 0.0072                 |                | 161                                               | 8                     | 193                                               | 1                     | 602                                                  | 131                   | 180                         | 95                         | a                 |
| 0.216                                                  | 0.011                  | 2.535                              | 0.053                  | 0.0850                                | 0.0083                 |                | 1262                                              | 58                    | 1282                                              | 15                    | 1315                                                 | 94                    | 95                          | 75                         | a                 |
| 0.1897                                                 | 0.0095                 | 1.947                              | 0.018                  | 0.0744                                | 0.0035                 |                | 1120                                              | 52                    | 1098                                              | 6                     | 1054                                                 | 48                    | 125                         | 65                         | a                 |
| 0.0540                                                 | 0.0027                 | 0.4050                             | 0.0013                 | 0.0544                                | 0.0031                 |                | 339                                               | 17                    | 345                                               | 1                     | 388                                                  | 64                    | 190                         | 60                         | a                 |
| <b>5. Solimões River, Brazil (3.8560°S, 63.6041°W)</b> |                        |                                    |                        |                                       |                        |                |                                                   |                       |                                                   |                       |                                                      |                       |                             |                            |                   |
| 0.0274                                                 | 0.0014                 | 0.18196                            | 0.00058                | 0.0482                                | 0.0056                 |                | 174                                               | 9                     | 170                                               | 1                     | 109                                                  | 138                   | 235                         | 165                        | a                 |
| 0.224                                                  | 0.011                  | 2.557                              | 0.039                  | 0.0829                                | 0.0057                 |                | 1302                                              | 59                    | 1288                                              | 11                    | 1266                                                 | 67                    | 300                         | 145                        | a                 |
| 0.0506                                                 | 0.0025                 | 0.38511                            | 0.00099                | 0.0552                                | 0.0028                 |                | 318                                               | 16                    | 331                                               | 1                     | 420                                                  | 56                    | 235                         | 120                        | a                 |
| 0.0274                                                 | 0.0014                 | 0.17775                            | 0.00033                | 0.0471                                | 0.0032                 |                | 174                                               | 9                     | 166                                               | 0                     | 55                                                   | 81                    | 330                         | 110                        | a                 |
| 0.0236                                                 | 0.0012                 | 0.17879                            | 0.00090                | 0.055                                 | 0.012                  |                | 150                                               | 7                     | 167                                               | 1                     | 413                                                  | 239                   | 180                         | 105                        | a                 |
| 0.00338                                                | 0.00017                | 0.02                               | 0.00                   | 0.0477                                | 0.0058                 |                | 22                                                | 1                     | 22                                                | 0                     | 82                                                   | 144                   | 245                         | 105                        | a                 |
| 0.1737                                                 | 0.0087                 | 1.763                              | 0.017                  | 0.0736                                | 0.0041                 |                | 1032                                              | 48                    | 1032                                              | 6                     | 1032                                                 | 57                    | 185                         | 135                        | a                 |
| 0.1661                                                 | 0.0083                 | 1.704                              | 0.017                  | 0.0744                                | 0.0045                 |                | 991                                               | 46                    | 1010                                              | 6                     | 1052                                                 | 61                    | 200                         | 80                         | a                 |
| 0.0424                                                 | 0.0021                 | 0.3927                             | 0.0011                 | 0.0672                                | 0.0043                 |                | 267                                               | 13                    | 336                                               | 1                     | 845                                                  | 67                    | 265                         | 115                        | a                 |
| 0.0976                                                 | 0.0049                 | 0.8048                             | 0.0053                 | 0.0598                                | 0.0040                 |                | 600                                               | 29                    | 600                                               | 3                     | 597                                                  | 73                    | 262                         | 120                        | a                 |
| 0.0275                                                 | 0.0014                 | 0.20300                            | 0.00055                | 0.0536                                | 0.0053                 |                | 175                                               | 9                     | 188                                               | 0                     | 355                                                  | 112                   | 280                         | 100                        | a                 |
| 0.1502                                                 | 0.0075                 | 1.494                              | 0.012                  | 0.0721                                | 0.0040                 |                | 902                                               | 42                    | 928                                               | 5                     | 990                                                  | 56                    | 265                         | 130                        | a                 |
| 0.1799                                                 | 0.0090                 | 1.850                              | 0.019                  | 0.0746                                | 0.0042                 |                | 1066                                              | 49                    | 1063                                              | 7                     | 1058                                                 | 57                    | 210                         | 100                        | a                 |
| 0.1596                                                 | 0.0080                 | 1.600                              | 0.015                  | 0.0727                                | 0.0041                 |                | 955                                               | 45                    | 970                                               | 6                     | 1006                                                 | 57                    | 460                         | 120                        | a                 |
| 0.1830                                                 | 0.0092                 | 1.910                              | 0.020                  | 0.0757                                | 0.0044                 |                | 1084                                              | 50                    | 1085                                              | 7                     | 1087                                                 | 58                    | 234                         | 220                        | a                 |
| 0.1762                                                 | 0.0088                 | 1.829                              | 0.019                  | 0.0753                                | 0.0043                 |                | 1046                                              | 48                    | 1056                                              | 7                     | 1076                                                 | 58                    | 225                         | 115                        | a                 |
| 0.1989                                                 | 0.0099                 | 2.191                              | 0.027                  | 0.0799                                | 0.0050                 |                | 1169                                              | 54                    | 1178                                              | 9                     | 1194                                                 | 61                    | 365                         | 135                        | a                 |
| 0.00289                                                | 0.00014                | 0.02                               | 0.00                   | 0.063                                 | 0.024                  |                | 19                                                | 1                     | 25                                                | 0                     | 697                                                  | 410                   | 240                         | 110                        | r                 |
| 0.0976                                                 | 0.0049                 | 0.8045                             | 0.0037                 | 0.0598                                | 0.0028                 |                | 600                                               | 29                    | 599                                               | 2                     | 597                                                  | 51                    | 155                         | 135                        | a                 |
| 0.0492                                                 | 0.0025                 | 0.3871                             | 0.0010                 | 0.0570                                | 0.0030                 |                | 310                                               | 15                    | 332                                               | 1                     | 493                                                  | 58                    | 210                         | 110                        | a                 |
| 0.0720                                                 | 0.0036                 | 0.5442                             | 0.0021                 | 0.0548                                | 0.0029                 |                | 448                                               | 22                    | 441                                               | 1                     | 404                                                  | 58                    | 210                         | 115                        | a                 |
| 0.239                                                  | 0.012                  | 2.947                              | 0.048                  | 0.0895                                | 0.0061                 |                | 1381                                              | 62                    | 1394                                              | 13                    | 1414                                                 | 66                    | 240                         | 115                        | a                 |
| 0.306                                                  | 0.015                  | 7.81                               | 0.37                   | 0.185                                 | 0.028                  |                | 1722                                              | 76                    | 2210                                              | 43                    | 2698                                                 | 127                   | 300                         | 90                         | a                 |
| 0.0415                                                 | 0.0021                 | 0.2039                             | 0.0012                 | 0.0357                                | 0.0051                 |                | 262                                               | 13                    | 188                                               | 1                     | -656                                                 | 197                   | 285                         | 160                        | a                 |
| 0.00271                                                | 0.00014                | 0.05                               | 0.00                   | 0.138                                 | 0.034                  |                | 17                                                | 1                     | 51                                                | 0                     | 2204                                                 | 216                   | 255                         | 130                        | r                 |
| 0.0732                                                 | 0.0037                 | 3.128                              | 0.063                  | 0.310                                 | 0.085                  |                | 456                                               | 22                    | 1440                                              | 16                    | 3520                                                 | 212                   | 210                         | 100                        | r                 |
| 0.00346                                                | 0.00017                | 0.05                               | 0.00                   | 0.097                                 | 0.032                  |                | 22                                                | 1                     | 46                                                | 0                     | 1564                                                 | 312                   | 156                         | 150                        | r                 |
| 0.0409                                                 | 0.0020                 | 0.32381                            | 0.00075                | 0.0574                                | 0.0033                 |                | 258                                               | 13                    | 285                                               | 1                     | 508                                                  | 62                    | 310                         | 115                        | a                 |
| 0.00303                                                | 0.00015                | 0.02                               | 0.00                   | 0.059                                 | 0.019                  |                | 20                                                | 1                     | 25                                                | 0                     | 568                                                  | 353                   | 175                         | 130                        | a                 |
| 0.1860                                                 | 0.0093                 | 1.941                              | 0.021                  | 0.0757                                | 0.0044                 |                | 1100                                              | 51                    | 1095                                              | 7                     | 1087                                                 | 58                    | 175                         | 160                        | a                 |
| 0.1617                                                 | 0.0081                 | 1.673                              | 0.016                  | 0.0750                                | 0.0043                 |                | 966                                               | 45                    | 998                                               | 6                     | 1070                                                 | 58                    | 205                         | 100                        | a                 |
| 0.0220                                                 | 0.0011                 | 0.16179                            | 0.00023                | 0.0534                                | 0.0034                 |                | 140                                               | 7                     | 152                                               | 0                     | 345                                                  | 72                    | 175                         | 100                        | a                 |
| 0.1652                                                 | 0.0083                 | 1.633                              | 0.015                  | 0.0717                                | 0.0039                 |                | 986                                               | 46                    | 983                                               | 6                     | 978                                                  | 56                    | 190                         | 145                        | a                 |

| $^{206}\text{Pb}^*/^{238}\text{U}$ | $\pm 2\sigma$<br>(abs) | $^{207}\text{Pb}^*/^{235}\text{U}$ | $\pm 2\sigma$<br>(abs) | $^{207}\text{Pb}^*/^{206}\text{Pb}^*$ | $\pm 2\sigma$<br>(abs) | corr.<br>coef. | $^{206}\text{Pb}^*/^{238}\text{U}$<br>age<br>(Ma) | $\pm 2\sigma$<br>(Ma) | $^{207}\text{Pb}^*/^{235}\text{U}$<br>age<br>(Ma) | $\pm 2\sigma$<br>(Ma) | $^{207}\text{Pb}^*/^{206}\text{Pb}^*$<br>age<br>(Ma) | $\pm 2\sigma$<br>(Ma) | Length<br>( $\mu\text{m}$ ) | Width<br>( $\mu\text{m}$ ) | Accept/<br>Reject |
|------------------------------------|------------------------|------------------------------------|------------------------|---------------------------------------|------------------------|----------------|---------------------------------------------------|-----------------------|---------------------------------------------------|-----------------------|------------------------------------------------------|-----------------------|-----------------------------|----------------------------|-------------------|
| 0.1941                             | 0.0097                 | 2.064                              | 0.024                  | 0.0771                                | 0.0046                 |                | 1144                                              | 53                    | 1137                                              | 8                     | 1124                                                 | 60                    | 225                         | 130                        | a                 |
| 0.0379                             | 0.0019                 | 0.2703                             | 0.0010                 | 0.0517                                | 0.0052                 |                | 240                                               | 12                    | 243                                               | 1                     | 273                                                  | 115                   | 215                         | 130                        | a                 |
| 0.0194                             | 0.00097                | 0.12724                            | 0.00027                | 0.0475                                | 0.0051                 |                | 124                                               | 6                     | 122                                               | 0                     | 73                                                   | 128                   | 225                         | 160                        | a                 |
| 0.206                              | 0.010                  | 2.458                              | 0.034                  | 0.0866                                | 0.0057                 |                | 1207                                              | 55                    | 1260                                              | 10                    | 1351                                                 | 64                    | 250                         | 165                        | a                 |
| 0.0487                             | 0.0024                 | 0.35426                            | 0.00071                | 0.0528                                | 0.0022                 |                | 306                                               | 15                    | 308                                               | 1                     | 319                                                  | 47                    | 135                         | 120                        | a                 |
| 0.252                              | 0.013                  | 3.324                              | 0.064                  | 0.0955                                | 0.0072                 |                | 1451                                              | 65                    | 1487                                              | 15                    | 1538                                                 | 71                    | 255                         | 160                        | a                 |
| 0.1632                             | 0.0082                 | 1.645                              | 0.015                  | 0.0731                                | 0.0041                 |                | 975                                               | 45                    | 988                                               | 6                     | 1016                                                 | 57                    | 145                         | 70                         | a                 |
| 0.0493                             | 0.0025                 | 0.35402                            | 0.00077                | 0.0521                                | 0.0023                 |                | 310                                               | 15                    | 308                                               | 1                     | 289                                                  | 50                    | 220                         | 130                        | a                 |
| 0.1855                             | 0.0093                 | 2.055                              | 0.024                  | 0.0803                                | 0.0051                 |                | 1097                                              | 51                    | 1134                                              | 8                     | 1205                                                 | 62                    | 155                         | 115                        | a                 |
| 0.1331                             | 0.0067                 | 1.2812                             | 0.0093                 | 0.0698                                | 0.0038                 |                | 805                                               | 38                    | 837                                               | 4                     | 923                                                  | 56                    | 165                         | 120                        | a                 |
| 0.1288                             | 0.0064                 | 1.2620                             | 0.0088                 | 0.0710                                | 0.0039                 |                | 781                                               | 37                    | 829                                               | 4                     | 959                                                  | 55                    | 160                         | 130                        | a                 |
| 0.0394                             | 0.0020                 | 0.29813                            | 0.00077                | 0.0549                                | 0.0036                 |                | 249                                               | 12                    | 265                                               | 1                     | 407                                                  | 73                    | 270                         | 145                        | a                 |
| 0.00602                            | 0.00030                | 0.06                               | 0.00                   | 0.068                                 | 0.016                  |                | 39                                                | 2                     | 56                                                | 0                     | 870                                                  | 250                   | 300                         | 165                        | r                 |
| 0.1562                             | 0.0078                 | 1.537                              | 0.014                  | 0.0714                                | 0.0042                 |                | 936                                               | 44                    | 945                                               | 6                     | 969                                                  | 60                    | 200                         | 130                        | a                 |
| 0.1668                             | 0.0083                 | 1.691                              | 0.019                  | 0.0735                                | 0.0048                 |                | 994                                               | 46                    | 1005                                              | 7                     | 1029                                                 | 66                    | 460                         | 104                        | a                 |
| 0.1706                             | 0.0085                 | 1.734                              | 0.021                  | 0.0737                                | 0.0052                 |                | 1015                                              | 47                    | 1021                                              | 8                     | 1033                                                 | 71                    | 460                         | 104                        | a                 |
| 0.0576                             | 0.0029                 | 0.6493                             | 0.0026                 | 0.0818                                | 0.0056                 |                | 361                                               | 18                    | 508                                               | 2                     | 1241                                                 | 67                    | 335                         | 140                        | r                 |
| 0.0414                             | 0.0021                 | 0.30884                            | 0.00066                | 0.0541                                | 0.0028                 |                | 261                                               | 13                    | 273                                               | 1                     | 376                                                  | 58                    | 350                         | 140                        | a                 |
| 0.1857                             | 0.0093                 | 1.925                              | 0.017                  | 0.0752                                | 0.0036                 |                | 1098                                              | 51                    | 1090                                              | 6                     | 1074                                                 | 48                    | 160                         | 140                        | a                 |
| 0.0267                             | 0.0013                 | 0.20579                            | 0.00031                | 0.0560                                | 0.0031                 |                | 170                                               | 8                     | 190                                               | 0                     | 451                                                  | 62                    | 160                         | 140                        | a                 |
| 0.1499                             | 0.0075                 | 1.4152                             | 0.0099                 | 0.0685                                | 0.0032                 |                | 901                                               | 42                    | 895                                               | 4                     | 883                                                  | 48                    | 260                         | 180                        | a                 |
| 0.0755                             | 0.0038                 | 0.5965                             | 0.0017                 | 0.0573                                | 0.0022                 |                | 469                                               | 23                    | 475                                               | 1                     | 504                                                  | 43                    | 255                         | 170                        | a                 |
| 0.0967                             | 0.0048                 | 0.7965                             | 0.0030                 | 0.0597                                | 0.0023                 |                | 595                                               | 28                    | 595                                               | 2                     | 594                                                  | 42                    | 195                         | 100                        | a                 |
| 0.1941                             | 0.0097                 | 2.052                              | 0.020                  | 0.0767                                | 0.0038                 |                | 1144                                              | 53                    | 1133                                              | 7                     | 1113                                                 | 50                    | 175                         | 100                        | a                 |
| 0.244                              | 0.012                  | 3.094                              | 0.050                  | 0.0918                                | 0.0060                 |                | 1410                                              | 64                    | 1431                                              | 12                    | 1463                                                 | 62                    | 370                         | 110                        | a                 |
| 0.0450                             | 0.0022                 | 0.3882                             | 0.0012                 | 0.0626                                | 0.0042                 |                | 284                                               | 14                    | 333                                               | 1                     | 695                                                  | 71                    | 225                         | 115                        | a                 |
| 0.0333                             | 0.0017                 | 0.26159                            | 0.00038                | 0.0570                                | 0.0025                 |                | 211                                               | 10                    | 236                                               | 0                     | 492                                                  | 48                    | 160                         | 120                        | a                 |
| 0.0481                             | 0.0024                 | 0.34552                            | 0.00062                | 0.0521                                | 0.0020                 |                | 303                                               | 15                    | 301                                               | 0                     | 292                                                  | 43                    | 250                         | 85                         | a                 |
| 0.1832                             | 0.0092                 | 1.904                              | 0.018                  | 0.0754                                | 0.0038                 |                | 1084                                              | 50                    | 1082                                              | 6                     | 1079                                                 | 51                    | 155                         | 150                        | a                 |
| 0.1655                             | 0.0083                 | 1.654                              | 0.013                  | 0.0725                                | 0.0034                 |                | 987                                               | 46                    | 991                                               | 5                     | 1000                                                 | 47                    | 215                         | 175                        | a                 |
| 0.1571                             | 0.0079                 | 1.941                              | 0.019                  | 0.0896                                | 0.0055                 |                | 940                                               | 44                    | 1095                                              | 6                     | 1417                                                 | 59                    | 130                         | 125                        | a                 |
| 0.1769                             | 0.0088                 | 1.835                              | 0.016                  | 0.0752                                | 0.0038                 |                | 1050                                              | 49                    | 1058                                              | 6                     | 1075                                                 | 50                    | 220                         | 130                        | a                 |
| 0.207                              | 0.010                  | 2.237                              | 0.026                  | 0.0783                                | 0.0043                 |                | 1214                                              | 56                    | 1193                                              | 8                     | 1154                                                 | 55                    | 140                         | 120                        | a                 |
| 0.0222                             | 0.0011                 | 0.19526                            | 0.00063                | 0.0637                                | 0.0092                 |                | 142                                               | 7                     | 181                                               | 1                     | 731                                                  | 154                   | 350                         | 160                        | a                 |
| 0.0991                             | 0.0050                 | 0.7954                             | 0.0031                 | 0.0582                                | 0.0023                 |                | 609                                               | 29                    | 594                                               | 2                     | 538                                                  | 43                    | 195                         | 165                        | a                 |
| 0.0836                             | 0.0042                 | 0.7272                             | 0.0043                 | 0.0631                                | 0.0045                 |                | 518                                               | 25                    | 555                                               | 3                     | 710                                                  | 76                    | 232                         | 115                        | a                 |
| 0.0283                             | 0.0014                 | 0.21477                            | 0.00041                | 0.0550                                | 0.0037                 |                | 180                                               | 9                     | 198                                               | 0                     | 414                                                  | 75                    | 270                         | 150                        | a                 |
| 0.1767                             | 0.0088                 | 1.801                              | 0.015                  | 0.0739                                | 0.0035                 |                | 1049                                              | 49                    | 1046                                              | 5                     | 1039                                                 | 48                    | 245                         | 200                        | a                 |
| 0.1905                             | 0.0095                 | 1.969                              | 0.018                  | 0.0750                                | 0.0036                 |                | 1124                                              | 52                    | 1105                                              | 6                     | 1068                                                 | 48                    | 285                         | 110                        | a                 |
| 0.0214                             | 0.0011                 | 0.17610                            | 0.00032                | 0.0596                                | 0.0050                 |                | 137                                               | 7                     | 165                                               | 0                     | 591                                                  | 91                    | 253                         | 215                        | a                 |
| 0.0972                             | 0.0049                 | 0.7960                             | 0.0037                 | 0.0594                                | 0.0028                 |                | 598                                               | 29                    | 595                                               | 2                     | 581                                                  | 51                    | 205                         | 175                        | a                 |
| 0.1909                             | 0.0095                 | 2.054                              | 0.020                  | 0.0780                                | 0.0039                 |                | 1126                                              | 52                    | 1133                                              | 7                     | 1147                                                 | 50                    | 225                         | 125                        | a                 |
| 0.1688                             | 0.0084                 | 1.667                              | 0.013                  | 0.0716                                | 0.0033                 |                | 1006                                              | 47                    | 996                                               | 5                     | 975                                                  | 47                    | 235                         | 95                         | a                 |
| 0.0488                             | 0.0024                 | 0.3841                             | 0.0010                 | 0.0571                                | 0.0031                 |                | 307                                               | 15                    | 330                                               | 1                     | 496                                                  | 59                    | 345                         | 125                        | a                 |
| 0.214                              | 0.011                  | 2.312                              | 0.025                  | 0.0784                                | 0.0039                 |                | 1249                                              | 57                    | 1216                                              | 8                     | 1158                                                 | 50                    | 155                         | 85                         | a                 |
| 0.239                              | 0.012                  | 3.262                              | 0.049                  | 0.0991                                | 0.0063                 |                | 1380                                              | 62                    | 1472                                              | 12                    | 1608                                                 | 59                    | 110                         | 100                        | a                 |
| 0.1883                             | 0.0094                 | 2.037                              | 0.019                  | 0.0784                                | 0.0040                 |                | 1112                                              | 51                    | 1128                                              | 7                     | 1158                                                 | 50                    | 225                         | 175                        | a                 |
| 0.00852                            | 0.00043                | 0.08                               | 0.00                   | 0.0709                                | 0.0077                 |                | 55                                                | 3                     | 81                                                | 0                     | 956                                                  | 111                   | 240                         | 80                         | r                 |
| 0.0395                             | 0.0020                 | 0.27659                            | 0.00036                | 0.0508                                | 0.0017                 |                | 250                                               | 12                    | 248                                               | 0                     | 232                                                  | 38                    | 205                         | 180                        | a                 |
| 0.1660                             | 0.0083                 | 1.611                              | 0.014                  | 0.0704                                | 0.0038                 |                | 990                                               | 46                    | 975                                               | 6                     | 941                                                  | 55                    | 195                         | 135                        | a                 |
| 0.0301                             | 0.0015                 | 0.24568                            | 0.00073                | 0.0591                                | 0.0058                 |                | 191                                               | 9                     | 223                                               | 1                     | 572                                                  | 107                   | 260                         | 100                        | a                 |

| $^{206}\text{Pb}^*/^{238}\text{U}$ | $\pm 2\sigma$<br>(abs) | $^{207}\text{Pb}^*/^{235}\text{U}$ | $\pm 2\sigma$<br>(abs) | $^{207}\text{Pb}^*/^{206}\text{Pb}^*$ | $\pm 2\sigma$<br>(abs) | corr.<br>coef. | $^{206}\text{Pb}^*/^{238}\text{U}$<br>age<br>(Ma) | $\pm 2\sigma$<br>(Ma) | $^{207}\text{Pb}^*/^{235}\text{U}$<br>age<br>(Ma) | $\pm 2\sigma$<br>(Ma) | $^{207}\text{Pb}^*/^{206}\text{Pb}^*$<br>age<br>(Ma) | $\pm 2\sigma$<br>(Ma) | Length<br>( $\mu\text{m}$ ) | Width<br>( $\mu\text{m}$ ) | Accept/<br>Reject |
|------------------------------------|------------------------|------------------------------------|------------------------|---------------------------------------|------------------------|----------------|---------------------------------------------------|-----------------------|---------------------------------------------------|-----------------------|------------------------------------------------------|-----------------------|-----------------------------|----------------------------|-------------------|
| 0.0297                             | 0.0015                 | 0.19491                            | 0.00028                | 0.0476                                | 0.0023                 |                | 189                                               | 9                     | 181                                               | 0                     | 77                                                   | 58                    | 295                         | 115                        | a                 |
| 0.1040                             | 0.0052                 | 0.8738                             | 0.0043                 | 0.0609                                | 0.0029                 |                | 638                                               | 30                    | 638                                               | 2                     | 637                                                  | 51                    | 230                         | 155                        | a                 |
| 0.273                              | 0.014                  | 3.859                              | 0.069                  | 0.1024                                | 0.0067                 |                | 1558                                              | 70                    | 1605                                              | 15                    | 1668                                                 | 61                    | 245                         | 125                        | a                 |
| 0.1902                             | 0.0095                 | 2.056                              | 0.020                  | 0.0784                                | 0.0040                 |                | 1122                                              | 52                    | 1134                                              | 7                     | 1158                                                 | 51                    | 325                         | 165                        | a                 |
| 0.1641                             | 0.0082                 | 1.940                              | 0.019                  | 0.0858                                | 0.0052                 |                | 979                                               | 46                    | 1095                                              | 7                     | 1333                                                 | 58                    | 230                         | 110                        | a                 |
| 0.1951                             | 0.0098                 | 2.147                              | 0.022                  | 0.0798                                | 0.0041                 |                | 1149                                              | 53                    | 1164                                              | 7                     | 1193                                                 | 51                    | 215                         | 155                        | a                 |
| 0.1739                             | 0.0087                 | 1.769                              | 0.015                  | 0.0738                                | 0.0035                 |                | 1034                                              | 48                    | 1034                                              | 5                     | 1035                                                 | 48                    | 300                         | 105                        | a                 |
| 0.1720                             | 0.0086                 | 1.678                              | 0.013                  | 0.0707                                | 0.0033                 |                | 1023                                              | 47                    | 1000                                              | 5                     | 949                                                  | 48                    | 185                         | 120                        | a                 |
| 0.0217                             | 0.0011                 | 0.22068                            | 0.00043                | 0.0739                                | 0.0067                 |                | 138                                               | 7                     | 202                                               | 0                     | 1037                                                 | 91                    | 455                         | 120                        | r                 |
| 0.1640                             | 0.0082                 | 1.666                              | 0.013                  | 0.0737                                | 0.0035                 |                | 979                                               | 46                    | 995                                               | 5                     | 1033                                                 | 48                    | 245                         | 155                        | a                 |
| 0.207                              | 0.010                  | 2.272                              | 0.025                  | 0.0797                                | 0.0042                 |                | 1212                                              | 55                    | 1204                                              | 8                     | 1189                                                 | 52                    | 200                         | 105                        | a                 |
| 0.224                              | 0.011                  | 2.381                              | 0.026                  | 0.0772                                | 0.0038                 |                | 1300                                              | 59                    | 1237                                              | 8                     | 1128                                                 | 50                    | 155                         | 80                         | a                 |
| 0.211                              | 0.011                  | 2.099                              | 0.021                  | 0.0721                                | 0.0034                 |                | 1235                                              | 56                    | 1148                                              | 7                     | 989                                                  | 47                    | 140                         | 95                         | a                 |
| 0.00306                            | 0.00015                | 0.01                               | 0.00                   | 0.034                                 | 0.020                  |                | 20                                                | 1                     | 14                                                | 0                     | -827                                                 | 853                   | 310                         | 140                        | a                 |
| 0.00                               | 0.00                   | 0.010                              | 0.000                  | 0.057                                 | 0.014                  |                | 8                                                 | 0                     | 10                                                | 0                     | 480                                                  | 278                   | 200                         | 120                        | a                 |
| 0.0471                             | 0.0024                 | 0.35667                            | 0.00068                | 0.0550                                | 0.0022                 |                | 296                                               | 15                    | 310                                               | 1                     | 411                                                  | 46                    | 260                         | 130                        | a                 |
| 0.1464                             | 0.0073                 | 1.3752                             | 0.0088                 | 0.0681                                | 0.0030                 |                | 881                                               | 41                    | 878                                               | 4                     | 872                                                  | 45                    | 200                         | 155                        | a                 |
| 0.00245                            | 0.00012                | 0.01                               | 0.00                   | 0.044                                 | 0.034                  |                | 16                                                | 1                     | 15                                                | 0                     | -126                                                 | 973                   | 195                         | 100                        | a                 |
| 0.1892                             | 0.0095                 | 2.001                              | 0.019                  | 0.0767                                | 0.0038                 |                | 1117                                              | 51                    | 1116                                              | 6                     | 1114                                                 | 49                    | 140                         | 140                        | a                 |
| 0.0423                             | 0.0021                 | 0.3419                             | 0.0012                 | 0.0586                                | 0.0049                 |                | 267                                               | 13                    | 299                                               | 1                     | 553                                                  | 92                    | 240                         | 110                        | a                 |
| 0.0365                             | 0.0018                 | 0.26003                            | 0.00051                | 0.0516                                | 0.0028                 |                | 231                                               | 11                    | 235                                               | 0                     | 268                                                  | 61                    | 305                         | 110                        | a                 |
| 0.0513                             | 0.0026                 | 0.3964                             | 0.0011                 | 0.0561                                | 0.0032                 |                | 322                                               | 16                    | 339                                               | 1                     | 455                                                  | 63                    | 150                         | 90                         | a                 |
| 0.0307                             | 0.0015                 | 0.20420                            | 0.00056                | 0.0482                                | 0.0043                 |                | 195                                               | 10                    | 189                                               | 0                     | 110                                                  | 106                   | 230                         | 130                        | a                 |
| 0.0646                             | 0.0032                 | 0.5590                             | 0.0022                 | 0.0628                                | 0.0038                 |                | 403                                               | 20                    | 451                                               | 1                     | 702                                                  | 65                    | 220                         | 150                        | a                 |
| 0.1822                             | 0.0091                 | 2.262                              | 0.035                  | 0.0900                                | 0.0076                 |                | 1079                                              | 50                    | 1200                                              | 11                    | 1426                                                 | 81                    | 230                         | 125                        | a                 |
| 0.1989                             | 0.0099                 | 2.177                              | 0.022                  | 0.0794                                | 0.0041                 |                | 1169                                              | 54                    | 1174                                              | 7                     | 1181                                                 | 51                    | 185                         | 140                        | a                 |
| 0.0478                             | 0.0024                 | 0.4222                             | 0.0011                 | 0.0641                                | 0.0034                 |                | 301                                               | 15                    | 358                                               | 1                     | 745                                                  | 56                    | 335                         | 65                         | a                 |
| 0.1675                             | 0.0084                 | 1.700                              | 0.013                  | 0.0736                                | 0.0035                 |                | 998                                               | 46                    | 1009                                              | 5                     | 1031                                                 | 48                    | 200                         | 150                        | a                 |
| 0.265                              | 0.013                  | 3.265                              | 0.050                  | 0.0894                                | 0.0051                 |                | 1514                                              | 68                    | 1473                                              | 12                    | 1413                                                 | 55                    | 220                         | 125                        | a                 |
| 0.0529                             | 0.0026                 | 0.4256                             | 0.0015                 | 0.0583                                | 0.0038                 |                | 332                                               | 16                    | 360                                               | 1                     | 541                                                  | 71                    | 240                         | 100                        | a                 |
| 0.1641                             | 0.0082                 | 1.667                              | 0.013                  | 0.0737                                | 0.0035                 |                | 980                                               | 46                    | 996                                               | 5                     | 1033                                                 | 48                    | 180                         | 160                        | a                 |
| 0.1573                             | 0.0079                 | 1.683                              | 0.015                  | 0.0776                                | 0.0043                 |                | 942                                               | 44                    | 1002                                              | 6                     | 1138                                                 | 55                    | 240                         | 140                        | a                 |
| 0.0208                             | 0.0010                 | 0.12195                            | 0.00074                | 0.043                                 | 0.012                  |                | 133                                               | 7                     | 117                                               | 1                     | -193                                                 | 366                   | 305                         | 145                        | a                 |
| 0.202                              | 0.010                  | 2.115                              | 0.021                  | 0.0761                                | 0.0037                 |                | 1184                                              | 54                    | 1154                                              | 7                     | 1098                                                 | 49                    | 210                         | 95                         | a                 |
| 0.1878                             | 0.0094                 | 1.970                              | 0.018                  | 0.0761                                | 0.0037                 |                | 1109                                              | 51                    | 1105                                              | 6                     | 1097                                                 | 49                    | 180                         | 115                        | a                 |
| 0.227                              | 0.011                  | 2.852                              | 0.038                  | 0.0911                                | 0.0053                 |                | 1319                                              | 60                    | 1369                                              | 10                    | 1449                                                 | 55                    | 195                         | 140                        | a                 |
| 0.1833                             | 0.0092                 | 1.959                              | 0.018                  | 0.0775                                | 0.0038                 |                | 1085                                              | 50                    | 1101                                              | 6                     | 1134                                                 | 49                    | 150                         | 110                        | a                 |
| 0.1933                             | 0.0097                 | 2.089                              | 0.022                  | 0.0784                                | 0.0042                 |                | 1139                                              | 52                    | 1145                                              | 7                     | 1157                                                 | 53                    | 130                         | 100                        | a                 |
| 0.1790                             | 0.0090                 | 1.831                              | 0.016                  | 0.0742                                | 0.0036                 |                | 1062                                              | 49                    | 1057                                              | 6                     | 1046                                                 | 49                    | 240                         | 145                        | a                 |
| 0.0430                             | 0.0021                 | 0.3377                             | 0.0011                 | 0.0570                                | 0.0043                 |                | 271                                               | 13                    | 295                                               | 1                     | 491                                                  | 83                    | 190                         | 120                        | a                 |
| 0.1657                             | 0.0083                 | 1.910                              | 0.027                  | 0.0836                                | 0.0071                 |                | 988                                               | 46                    | 1084                                              | 9                     | 1283                                                 | 83                    | 270                         | 160                        | a                 |
| 0.1815                             | 0.0091                 | 1.925                              | 0.017                  | 0.0769                                | 0.0038                 |                | 1075                                              | 50                    | 1090                                              | 6                     | 1119                                                 | 49                    | 175                         | 110                        | a                 |
| 0.0314                             | 0.0016                 | 0.2397                             | 0.0012                 | 0.0554                                | 0.0089                 |                | 199                                               | 10                    | 218                                               | 1                     | 430                                                  | 180                   | 275                         | 210                        | a                 |
| 0.1971                             | 0.0099                 | 2.136                              | 0.022                  | 0.0786                                | 0.0040                 |                | 1160                                              | 53                    | 1161                                              | 7                     | 1163                                                 | 51                    | 240                         | 155                        | a                 |
| 0.0232                             | 0.0012                 | 0.15625                            | 0.00016                | 0.0489                                | 0.0022                 |                | 148                                               | 7                     | 147                                               | 0                     | 141                                                  | 52                    | 175                         | 160                        | a                 |
| 0.201                              | 0.010                  | 2.166                              | 0.022                  | 0.0783                                | 0.0039                 |                | 1178                                              | 54                    | 1170                                              | 7                     | 1155                                                 | 50                    | 150                         | 130                        | a                 |
| 0.1892                             | 0.0095                 | 1.950                              | 0.018                  | 0.0747                                | 0.0037                 |                | 1117                                              | 51                    | 1098                                              | 6                     | 1061                                                 | 50                    | 245                         | 100                        | a                 |
| 0.0401                             | 0.0020                 | 0.28950                            | 0.00042                | 0.0523                                | 0.0019                 |                | 254                                               | 12                    | 258                                               | 0                     | 299                                                  | 42                    | 170                         | 130                        | a                 |
| 0.1546                             | 0.0077                 | 1.517                              | 0.011                  | 0.0712                                | 0.0032                 |                | 927                                               | 43                    | 937                                               | 4                     | 962                                                  | 46                    | 180                         | 150                        | a                 |
| 0.00628                            | 0.00031                | 0.04                               | 0.00                   | 0.044                                 | 0.015                  |                | 40                                                | 2                     | 38                                                | 0                     | -89                                                  | 414                   | 180                         | 140                        | a                 |
| 0.204                              | 0.010                  | 2.166                              | 0.023                  | 0.0771                                | 0.0040                 |                | 1196                                              | 55                    | 1170                                              | 7                     | 1123                                                 | 52                    | 185                         | 155                        | a                 |

| $^{206}\text{Pb}^*/^{238}\text{U}$ | $\pm 2\sigma$<br>(abs) | $^{207}\text{Pb}^*/^{235}\text{U}$ | $\pm 2\sigma$<br>(abs) | $^{207}\text{Pb}^*/^{206}\text{Pb}^*$ | $\pm 2\sigma$<br>(abs) | corr.<br>coef. | $^{206}\text{Pb}^*/^{238}\text{U}$<br>age<br>(Ma) | $\pm 2\sigma$<br>(Ma) | $^{207}\text{Pb}^*/^{235}\text{U}$<br>age<br>(Ma) | $\pm 2\sigma$<br>(Ma) | $^{207}\text{Pb}^*/^{206}\text{Pb}^*$<br>age<br>(Ma) | $\pm 2\sigma$<br>(Ma) | Length<br>( $\mu\text{m}$ ) | Width<br>( $\mu\text{m}$ ) | Accept/<br>Reject |
|------------------------------------|------------------------|------------------------------------|------------------------|---------------------------------------|------------------------|----------------|---------------------------------------------------|-----------------------|---------------------------------------------------|-----------------------|------------------------------------------------------|-----------------------|-----------------------------|----------------------------|-------------------|
| 0.0920                             | 0.0046                 | 0.9492                             | 0.0043                 | 0.0749                                | 0.0037                 |                | 567                                               | 27                    | 678                                               | 2                     | 1065                                                 | 49                    | 140                         | 120                        | a                 |
| 0.00962                            | 0.00048                | 0.05950                            | 0.00037                | 0.045                                 | 0.029                  |                | 62                                                | 3                     | 59                                                | 0                     | -63                                                  | 791                   | 225                         | 120                        | a                 |
| 0.1762                             | 0.0088                 | 1.834                              | 0.016                  | 0.0755                                | 0.0037                 |                | 1046                                              | 48                    | 1058                                              | 6                     | 1082                                                 | 50                    | 190                         | 130                        | a                 |
| 0.0420                             | 0.0021                 | 0.4049                             | 0.0016                 | 0.0699                                | 0.0068                 |                | 265                                               | 13                    | 345                                               | 1                     | 924                                                  | 99                    | 235                         | 125                        | r                 |
| 0.0374                             | 0.0019                 | 0.2819                             | 0.0011                 | 0.0547                                | 0.0059                 |                | 237                                               | 12                    | 252                                               | 1                     | 399                                                  | 122                   | 245                         | 180                        | a                 |
| 0.1910                             | 0.0095                 | 2.076                              | 0.021                  | 0.0789                                | 0.0041                 |                | 1127                                              | 52                    | 1141                                              | 7                     | 1169                                                 | 51                    | 170                         | 100                        | a                 |
| 0.222                              | 0.011                  | 3.391                              | 0.054                  | 0.1106                                | 0.0079                 |                | 1295                                              | 59                    | 1502                                              | 12                    | 1809                                                 | 65                    | 145                         | 125                        | a                 |
| 0.1902                             | 0.0095                 | 2.017                              | 0.019                  | 0.0769                                | 0.0038                 |                | 1123                                              | 52                    | 1121                                              | 6                     | 1118                                                 | 49                    | 300                         | 150                        | a                 |
| 0.0282                             | 0.0014                 | 0.19014                            | 0.00028                | 0.0489                                | 0.0026                 |                | 179                                               | 9                     | 177                                               | 0                     | 142                                                  | 61                    | 145                         | 100                        | a                 |
| 0.0376                             | 0.0019                 | 0.2663                             | 0.0016                 | 0.0514                                | 0.0083                 |                | 238                                               | 12                    | 240                                               | 1                     | 259                                                  | 186                   | 255                         | 130                        | a                 |
| 0.308                              | 0.015                  | 4.79                               | 0.11                   | 0.1126                                | 0.0081                 |                | 1733                                              | 76                    | 1783                                              | 19                    | 1842                                                 | 65                    | 280                         | 130                        | a                 |
| 0.380                              | 0.019                  | 6.83                               | 0.22                   | 0.131                                 | 0.011                  |                | 2074                                              | 89                    | 2090                                              | 28                    | 2105                                                 | 73                    | 155                         | 130                        | a                 |
| 0.376                              | 0.019                  | 6.96                               | 0.22                   | 0.134                                 | 0.011                  |                | 2060                                              | 89                    | 2106                                              | 29                    | 2151                                                 | 75                    | 240                         | 220                        | a                 |
| 0.1846                             | 0.0092                 | 2.088                              | 0.020                  | 0.0820                                | 0.0043                 |                | 1092                                              | 50                    | 1145                                              | 7                     | 1246                                                 | 52                    | 155                         | 90                         | a                 |
| 0.253                              | 0.013                  | 4.507                              | 0.094                  | 0.129                                 | 0.011                  |                | 1455                                              | 65                    | 1732                                              | 18                    | 2086                                                 | 73                    | 170                         | 120                        | a                 |
| 0.0244                             | 0.0012                 | 0.1430                             | 0.0010                 | 0.042                                 | 0.012                  |                | 156                                               | 8                     | 136                                               | 1                     | -200                                                 | 365                   | 220                         | 125                        | a                 |
| 0.1912                             | 0.0096                 | 2.448                              | 0.028                  | 0.0929                                | 0.0055                 |                | 1128                                              | 52                    | 1257                                              | 8                     | 1485                                                 | 56                    | 200                         | 105                        | a                 |
| 0.1881                             | 0.0094                 | 1.988                              | 0.019                  | 0.0766                                | 0.0038                 |                | 1111                                              | 51                    | 1111                                              | 6                     | 1112                                                 | 50                    | 160                         | 155                        | a                 |
| 0.1801                             | 0.0090                 | 1.925                              | 0.018                  | 0.0775                                | 0.0039                 |                | 1068                                              | 49                    | 1090                                              | 6                     | 1134                                                 | 50                    | 205                         | 140                        | a                 |
| 0.0265                             | 0.0013                 | 0.19406                            | 0.00020                | 0.0531                                | 0.0020                 |                | 169                                               | 8                     | 180                                               | 0                     | 331                                                  | 43                    | 125                         | 110                        | a                 |
| 0.0391                             | 0.0020                 | 0.29037                            | 0.00093                | 0.0538                                | 0.0044                 |                | 247                                               | 12                    | 259                                               | 1                     | 363                                                  | 93                    | 262                         | 205                        | a                 |
| 0.1839                             | 0.0092                 | 1.946                              | 0.018                  | 0.0767                                | 0.0038                 |                | 1088                                              | 50                    | 1097                                              | 6                     | 1114                                                 | 50                    | 285                         | 110                        | a                 |
| 0.0473                             | 0.0024                 | 0.34248                            | 0.00060                | 0.0525                                | 0.0020                 |                | 298                                               | 15                    | 299                                               | 0                     | 308                                                  | 42                    | 270                         | 125                        | a                 |
| 0.1180                             | 0.0059                 | 1.2390                             | 0.0071                 | 0.0762                                | 0.0037                 |                | 719                                               | 34                    | 818                                               | 3                     | 1099                                                 | 49                    | 200                         | 154                        | a                 |
| 0.1865                             | 0.0093                 | 1.956                              | 0.018                  | 0.0761                                | 0.0038                 |                | 1102                                              | 51                    | 1101                                              | 6                     | 1098                                                 | 50                    | 330                         | 145                        | a                 |
| 0.240                              | 0.012                  | 2.914                              | 0.037                  | 0.0879                                | 0.0047                 |                | 1389                                              | 63                    | 1386                                              | 10                    | 1381                                                 | 51                    | 195                         | 155                        | a                 |
| 0.207                              | 0.010                  | 2.282                              | 0.023                  | 0.0799                                | 0.0039                 |                | 1213                                              | 56                    | 1207                                              | 7                     | 1195                                                 | 48                    | 270                         | 120                        | a                 |
| 0.0819                             | 0.0041                 | 0.6471                             | 0.0020                 | 0.0573                                | 0.0021                 |                | 507                                               | 24                    | 507                                               | 1                     | 504                                                  | 40                    | 275                         | 140                        | a                 |
| 0.1794                             | 0.0090                 | 1.829                              | 0.015                  | 0.0739                                | 0.0033                 |                | 1064                                              | 49                    | 1056                                              | 5                     | 1040                                                 | 45                    | 180                         | 130                        | a                 |
| 0.220                              | 0.011                  | 2.581                              | 0.029                  | 0.0852                                | 0.0044                 |                | 1280                                              | 58                    | 1295                                              | 8                     | 1320                                                 | 50                    | 165                         | 155                        | a                 |
| 0.1843                             | 0.0092                 | 1.890                              | 0.016                  | 0.0744                                | 0.0033                 |                | 1090                                              | 50                    | 1078                                              | 6                     | 1052                                                 | 45                    | 140                         | 115                        | a                 |
| 0.0231                             | 0.0012                 | 0.14790                            | 0.00014                | 0.0464                                | 0.0018                 |                | 147                                               | 7                     | 140                                               | 0                     | 16                                                   | 48                    | 235                         | 200                        | a                 |
| 0.0290                             | 0.0014                 | 0.23319                            | 0.00035                | 0.0584                                | 0.0030                 |                | 184                                               | 9                     | 213                                               | 0                     | 543                                                  | 56                    | 230                         | 110                        | a                 |
| 0.1101                             | 0.0055                 | 0.9392                             | 0.0040                 | 0.0619                                | 0.0024                 |                | 673                                               | 32                    | 672                                               | 2                     | 670                                                  | 41                    | 167                         | 150                        | a                 |
| 0.0322                             | 0.0016                 | 0.21857                            | 0.00027                | 0.0493                                | 0.0019                 |                | 204                                               | 10                    | 201                                               | 0                     | 161                                                  | 45                    | 200                         | 105                        | a                 |
| 0.1919                             | 0.0096                 | 2.087                              | 0.021                  | 0.0789                                | 0.0041                 |                | 1131                                              | 52                    | 1145                                              | 7                     | 1170                                                 | 51                    | 175                         | 85                         | a                 |
| 0.0223                             | 0.0011                 | 0.16089                            | 0.00017                | 0.0523                                | 0.0025                 |                | 142                                               | 7                     | 151                                               | 0                     | 300                                                  | 54                    | 170                         | 160                        | a                 |
| 0.0605                             | 0.0030                 | 0.6365                             | 0.0021                 | 0.0764                                | 0.0041                 |                | 378                                               | 18                    | 500                                               | 1                     | 1105                                                 | 53                    | 250                         | 100                        | r                 |
| 0.256                              | 0.013                  | 3.198                              | 0.045                  | 0.0907                                | 0.0050                 |                | 1468                                              | 66                    | 1457                                              | 11                    | 1441                                                 | 53                    | 210                         | 175                        | a                 |
| 0.0725                             | 0.0036                 | 0.5599                             | 0.0020                 | 0.0560                                | 0.0027                 |                | 451                                               | 22                    | 451                                               | 1                     | 452                                                  | 53                    | 180                         | 115                        | a                 |
| 0.0280                             | 0.0014                 | 0.20264                            | 0.00028                | 0.0525                                | 0.0026                 |                | 178                                               | 9                     | 187                                               | 0                     | 306                                                  | 57                    | 175                         | 145                        | a                 |
| 0.1731                             | 0.0087                 | 1.706                              | 0.013                  | 0.0715                                | 0.0031                 |                | 1029                                              | 48                    | 1011                                              | 5                     | 972                                                  | 44                    | 200                         | 155                        | a                 |
| 0.1722                             | 0.0086                 | 1.762                              | 0.014                  | 0.0742                                | 0.0034                 |                | 1024                                              | 48                    | 1032                                              | 5                     | 1048                                                 | 47                    | 185                         | 125                        | a                 |
| 0.1898                             | 0.0095                 | 2.006                              | 0.018                  | 0.0767                                | 0.0036                 |                | 1120                                              | 52                    | 1118                                              | 6                     | 1113                                                 | 46                    | 210                         | 185                        | a                 |
| 0.0422                             | 0.0021                 | 0.29799                            | 0.00042                | 0.0513                                | 0.0017                 |                | 266                                               | 13                    | 265                                               | 0                     | 252                                                  | 38                    | 215                         | 125                        | a                 |
| 0.1776                             | 0.0089                 | 1.853                              | 0.018                  | 0.0757                                | 0.0041                 |                | 1054                                              | 49                    | 1064                                              | 6                     | 1086                                                 | 54                    | 265                         | 135                        | a                 |
| 0.0291                             | 0.0015                 | 0.21342                            | 0.00031                | 0.0531                                | 0.0027                 |                | 185                                               | 9                     | 196                                               | 0                     | 334                                                  | 57                    | 235                         | 110                        | a                 |
| 0.00                               | 0.00                   | 0.01                               | 0.00                   | 0.0594                                | 0.0057                 |                | 7                                                 | 0                     | 9                                                 | 0                     | 582                                                  | 104                   | 200                         | 115                        | a                 |
| 0.225                              | 0.011                  | 2.729                              | 0.033                  | 0.0880                                | 0.0047                 |                | 1308                                              | 59                    | 1336                                              | 9                     | 1382                                                 | 51                    | 280                         | 105                        | a                 |
| 0.0263                             | 0.0013                 | 0.20061                            | 0.00042                | 0.0553                                | 0.0044                 |                | 167                                               | 8                     | 186                                               | 0                     | 424                                                  | 89                    | 240                         | 140                        | a                 |
| 0.1786                             | 0.0089                 | 1.824                              | 0.015                  | 0.0741                                | 0.0034                 |                | 1059                                              | 49                    | 1054                                              | 5                     | 1043                                                 | 46                    | 220                         | 105                        | a                 |

| $^{206}\text{Pb}^*/^{238}\text{U}$                     | $\pm 2\sigma$<br>(abs) | $^{207}\text{Pb}^*/^{235}\text{U}$ | $\pm 2\sigma$<br>(abs) | $^{207}\text{Pb}^*/^{206}\text{Pb}^*$ | $\pm 2\sigma$<br>(abs) | corr.<br>coef. | $^{206}\text{Pb}^*/^{238}\text{U}$<br>age<br>(Ma) | $\pm 2\sigma$<br>(Ma) | $^{207}\text{Pb}^*/^{235}\text{U}$<br>age<br>(Ma) | $\pm 2\sigma$<br>(Ma) | $^{207}\text{Pb}^*/^{206}\text{Pb}^*$<br>age<br>(Ma) | $\pm 2\sigma$<br>(Ma) | Length<br>( $\mu\text{m}$ ) | Width<br>( $\mu\text{m}$ ) | Accept/<br>Reject |
|--------------------------------------------------------|------------------------|------------------------------------|------------------------|---------------------------------------|------------------------|----------------|---------------------------------------------------|-----------------------|---------------------------------------------------|-----------------------|------------------------------------------------------|-----------------------|-----------------------------|----------------------------|-------------------|
| 0.0244                                                 | 0.0012                 | 0.17152                            | 0.00019                | 0.0510                                | 0.0024                 |                | 155                                               | 8                     | 161                                               | 0                     | 242                                                  | 54                    | 180                         | 135                        | a                 |
| 0.242                                                  | 0.012                  | 2.949                              | 0.038                  | 0.0883                                | 0.0047                 |                | 1399                                              | 63                    | 1394                                              | 10                    | 1388                                                 | 51                    | 150                         | 115                        | a                 |
| 0.1999                                                 | 0.0100                 | 2.154                              | 0.021                  | 0.0782                                | 0.0038                 |                | 1175                                              | 54                    | 1166                                              | 7                     | 1151                                                 | 48                    | 160                         | 155                        | a                 |
| 0.1633                                                 | 0.0082                 | 1.594                              | 0.012                  | 0.0708                                | 0.0032                 |                | 975                                               | 45                    | 968                                               | 5                     | 951                                                  | 46                    | 235                         | 120                        | a                 |
| 0.0396                                                 | 0.0020                 | 0.30561                            | 0.00051                | 0.0560                                | 0.0024                 |                | 250                                               | 12                    | 271                                               | 0                     | 452                                                  | 47                    | 200                         | 130                        | a                 |
| 0.0553                                                 | 0.0028                 | 0.4053                             | 0.0013                 | 0.0532                                | 0.0031                 |                | 347                                               | 17                    | 345                                               | 1                     | 337                                                  | 67                    | 215                         | 115                        | a                 |
| 0.1783                                                 | 0.0089                 | 1.800                              | 0.014                  | 0.0732                                | 0.0033                 |                | 1057                                              | 49                    | 1045                                              | 5                     | 1020                                                 | 45                    | 250                         | 125                        | a                 |
| 0.1442                                                 | 0.0072                 | 1.3909                             | 0.0091                 | 0.0699                                | 0.0032                 |                | 869                                               | 41                    | 885                                               | 4                     | 927                                                  | 46                    | 205                         | 125                        | a                 |
| 0.1629                                                 | 0.0081                 | 1.614                              | 0.011                  | 0.0719                                | 0.0031                 |                | 973                                               | 45                    | 976                                               | 4                     | 982                                                  | 44                    | 145                         | 125                        | a                 |
| 0.1558                                                 | 0.0078                 | 1.537                              | 0.010                  | 0.0716                                | 0.0031                 |                | 934                                               | 44                    | 945                                               | 4                     | 973                                                  | 44                    | 275                         | 135                        | a                 |
| 0.206                                                  | 0.010                  | 2.269                              | 0.023                  | 0.0800                                | 0.0039                 |                | 1206                                              | 55                    | 1203                                              | 7                     | 1197                                                 | 48                    | 195                         | 130                        | a                 |
| 0.0699                                                 | 0.0035                 | 0.5301                             | 0.0022                 | 0.0550                                | 0.0033                 |                | 436                                               | 21                    | 432                                               | 1                     | 411                                                  | 67                    | 350                         | 140                        | a                 |
| 0.0889                                                 | 0.0044                 | 0.7267                             | 0.0028                 | 0.0593                                | 0.0025                 |                | 549                                               | 26                    | 555                                               | 2                     | 578                                                  | 47                    | 235                         | 120                        | a                 |
| 0.0524                                                 | 0.0026                 | 0.39732                            | 0.00091                | 0.0550                                | 0.0024                 |                | 329                                               | 16                    | 340                                               | 1                     | 414                                                  | 49                    | 210                         | 150                        | a                 |
| 0.00771                                                | 0.00039                | 0.04817                            | 0.00010                | 0.045                                 | 0.012                  |                | 50                                                | 2                     | 48                                                | 0                     | -40                                                  | 333                   | 240                         | 120                        | a                 |
| 0.1518                                                 | 0.0076                 | 1.510                              | 0.010                  | 0.0721                                | 0.0032                 |                | 911                                               | 43                    | 935                                               | 4                     | 990                                                  | 44                    | 195                         | 130                        | a                 |
| 0.0245                                                 | 0.0012                 | 0.17500                            | 0.00030                | 0.0518                                | 0.0037                 |                | 156                                               | 8                     | 164                                               | 0                     | 276                                                  | 81                    | 240                         | 120                        | a                 |
| <b>6. Solimões River, Brazil (3.9256°S, 62.8996°W)</b> |                        |                                    |                        |                                       |                        |                |                                                   |                       |                                                   |                       |                                                      |                       |                             |                            |                   |
| 0.186                                                  | 0.032                  | 3.49                               | 0.67                   | 0.137                                 | 0.013                  | 0.831          | 1525                                              | 152                   | 1097                                              | 177                   | 2183                                                 | 170                   | 90                          | 40                         | r                 |
| 0.246                                                  | 0.014                  | 5.63                               | 0.53                   | 0.166                                 | 0.018                  | 0.972          | 1921                                              | 81                    | 1416                                              | 74                    | 2520                                                 | 182                   | 90                          | 60                         | r                 |
| 0.248                                                  | 0.015                  | 5.41                               | 0.33                   | 0.1581                                | 0.0042                 | 0.884          | 1886                                              | 53                    | 1428                                              | 76                    | 2436                                                 | 45                    | 90                          | 65                         | r                 |
| 0.1796                                                 | 0.0097                 | 2.54                               | 0.15                   | 0.1028                                | 0.0030                 | 0.873          | 1285                                              | 42                    | 1065                                              | 53                    | 1675                                                 | 53                    | 150                         | 70                         | a                 |
| 0.1829                                                 | 0.0099                 | 2.54                               | 0.14                   | 0.1009                                | 0.0027                 | 0.886          | 1285                                              | 42                    | 1083                                              | 54                    | 1641                                                 | 50                    | 160                         | 60                         | a                 |
| 0.250                                                  | 0.015                  | 4.68                               | 0.29                   | 0.1355                                | 0.0037                 | 0.896          | 1764                                              | 51                    | 1441                                              | 75                    | 2171                                                 | 48                    | 115                         | 100                        | a                 |
| 0.1684                                                 | 0.0087                 | 2.12                               | 0.12                   | 0.0912                                | 0.0025                 | 0.879          | 1155                                              | 38                    | 1003                                              | 48                    | 1452                                                 | 53                    | 95                          | 75                         | a                 |
| 0.229                                                  | 0.013                  | 3.79                               | 0.23                   | 0.1200                                | 0.0034                 | 0.894          | 1590                                              | 49                    | 1330                                              | 69                    | 1956                                                 | 50                    | 100                         | 45                         | a                 |
| 0.333                                                  | 0.021                  | 8.64                               | 0.57                   | 0.1878                                | 0.0050                 | 0.904          | 2300                                              | 60                    | 1855                                              | 101                   | 2723                                                 | 44                    | 135                         | 90                         | a                 |
| 0.199                                                  | 0.011                  | 2.65                               | 0.16                   | 0.0966                                | 0.0030                 | 0.891          | 1315                                              | 45                    | 1170                                              | 61                    | 1559                                                 | 58                    | 135                         | 60                         | a                 |
| 0.272                                                  | 0.016                  | 4.83                               | 0.30                   | 0.1289                                | 0.0034                 | 0.913          | 1790                                              | 52                    | 1549                                              | 81                    | 2083                                                 | 46                    | 100                         | 70                         | a                 |
| 0.1749                                                 | 0.0091                 | 2.08                               | 0.11                   | 0.0864                                | 0.0023                 | 0.893          | 1143                                              | 37                    | 1039                                              | 50                    | 1347                                                 | 52                    | 165                         | 75                         | a                 |
| 0.196                                                  | 0.011                  | 2.53                               | 0.15                   | 0.0936                                | 0.0027                 | 0.898          | 1282                                              | 43                    | 1156                                              | 59                    | 1501                                                 | 54                    | 90                          | 75                         | a                 |
| 0.0827                                                 | 0.0044                 | 0.586                              | 0.037                  | 0.0513                                | 0.0033                 | 0.632          | 468                                               | 24                    | 512                                               | 26                    | 257                                                  | 148                   | 100                         | 33                         | a                 |
| 0.246                                                  | 0.014                  | 3.85                               | 0.23                   | 0.1134                                | 0.0030                 | 0.912          | 1604                                              | 49                    | 1419                                              | 74                    | 1855                                                 | 48                    | 115                         | 45                         | a                 |
| 0.217                                                  | 0.013                  | 3.00                               | 0.19                   | 0.1004                                | 0.0027                 | 0.914          | 1408                                              | 48                    | 1265                                              | 68                    | 1632                                                 | 49                    | 105                         | 65                         | a                 |
| 0.224                                                  | 0.013                  | 3.18                               | 0.28                   | 0.1028                                | 0.0099                 | 0.660          | 1452                                              | 68                    | 1305                                              | 69                    | 1675                                                 | 179                   | 95                          | 60                         | a                 |
| 0.217                                                  | 0.012                  | 2.98                               | 0.17                   | 0.0993                                | 0.0026                 | 0.909          | 1401                                              | 44                    | 1268                                              | 63                    | 1611                                                 | 49                    | 125                         | 100                        | a                 |
| 0.1789                                                 | 0.0093                 | 2.11                               | 0.12                   | 0.0857                                | 0.0024                 | 0.894          | 1153                                              | 38                    | 1061                                              | 51                    | 1331                                                 | 53                    | 135                         | 80                         | a                 |
| 0.218                                                  | 0.012                  | 2.98                               | 0.18                   | 0.0994                                | 0.0026                 | 0.910          | 1403                                              | 45                    | 1270                                              | 65                    | 1613                                                 | 49                    | 100                         | 40                         | a                 |
| 0.180                                                  | 0.010                  | 2.13                               | 0.13                   | 0.0856                                | 0.0024                 | 0.903          | 1158                                              | 42                    | 1068                                              | 57                    | 1330                                                 | 54                    | 70                          | 55                         | a                 |
| 0.01294                                                | 0.00053                | 0.0787                             | 0.0047                 | 0.0441                                | 0.0040                 | 0.231          | 77                                                | 4                     | 83                                                | 3                     | -106                                                 | 224                   | 100                         | 55                         | a                 |
| 0.222                                                  | 0.012                  | 3.06                               | 0.18                   | 0.0999                                | 0.0029                 | 0.904          | 1423                                              | 45                    | 1294                                              | 65                    | 1623                                                 | 53                    | 11                          | 85                         | a                 |
| 0.230                                                  | 0.013                  | 3.24                               | 0.19                   | 0.1024                                | 0.0027                 | 0.913          | 1467                                              | 45                    | 1332                                              | 67                    | 1668                                                 | 48                    | 95                          | 60                         | a                 |
| 0.247                                                  | 0.014                  | 3.70                               | 0.23                   | 0.1088                                | 0.0029                 | 0.917          | 1571                                              | 49                    | 1421                                              | 74                    | 1779                                                 | 48                    | 150                         | 110                        | a                 |
| 0.0414                                                 | 0.0023                 | 0.272                              | 0.043                  | 0.048                                 | 0.014                  | 0.740          | 244                                               | 34                    | 262                                               | 15                    | 78                                                   | 701                   | 130                         | 45                         | a                 |
| 0.375                                                  | 0.027                  | 9.45                               | 0.71                   | 0.1827                                | 0.0048                 | 0.928          | 2383                                              | 69                    | 2054                                              | 126                   | 2677                                                 | 44                    | 160                         | 60                         | a                 |
| 0.1517                                                 | 0.0075                 | 1.309                              | 0.068                  | 0.0626                                | 0.0017                 | 0.900          | 850                                               | 30                    | 910                                               | 42                    | 695                                                  | 58                    | 75                          | 55                         | a                 |
| 0.190                                                  | 0.011                  | 2.27                               | 0.14                   | 0.0866                                | 0.0025                 | 0.903          | 1202                                              | 42                    | 1121                                              | 58                    | 1351                                                 | 55                    | 125                         | 60                         | a                 |
| 0.0476                                                 | 0.0020                 | 0.320                              | 0.019                  | 0.0488                                | 0.0039                 | 0.836          | 282                                               | 14                    | 300                                               | 13                    | 138                                                  | 185                   | 240                         | 70                         | a                 |
| 0.0642                                                 | 0.0028                 | 0.452                              | 0.026                  | 0.0511                                | 0.0038                 | 0.883          | 379                                               | 18                    | 401                                               | 17                    | 244                                                  | 172                   | 200                         | 70                         | a                 |
| 0.1731                                                 | 0.0088                 | 1.92                               | 0.10                   | 0.0806                                | 0.0024                 | 0.885          | 1089                                              | 36                    | 1029                                              | 48                    | 1212                                                 | 58                    | 150                         | 90                         | a                 |
| 0.207                                                  | 0.011                  | 2.56                               | 0.15                   | 0.0898                                | 0.0025                 | 0.908          | 1289                                              | 43                    | 1212                                              | 61                    | 1421                                                 | 53                    | 130                         | 70                         | a                 |

| $^{206}\text{Pb}^*/^{238}\text{U}$ | $\pm 2\sigma$<br>(abs) | $^{207}\text{Pb}^*/^{235}\text{U}$ | $\pm 2\sigma$<br>(abs) | $^{207}\text{Pb}^*/^{206}\text{Pb}^*$ | $\pm 2\sigma$<br>(abs) | corr.<br>coef. | $^{206}\text{Pb}^*/^{238}\text{U}$<br>age<br>(Ma) | $\pm 2\sigma$<br>(Ma) | $^{207}\text{Pb}^*/^{235}\text{U}$<br>age<br>(Ma) | $\pm 2\sigma$<br>(Ma) | $^{207}\text{Pb}^*/^{206}\text{Pb}^*$<br>age<br>(Ma) | $\pm 2\sigma$<br>(Ma) | Length<br>( $\mu\text{m}$ ) | Width<br>( $\mu\text{m}$ ) | Accept/<br>Reject |
|------------------------------------|------------------------|------------------------------------|------------------------|---------------------------------------|------------------------|----------------|---------------------------------------------------|-----------------------|---------------------------------------------------|-----------------------|------------------------------------------------------|-----------------------|-----------------------------|----------------------------|-------------------|
| 0.234                              | 0.013                  | 3.18                               | 0.19                   | 0.0983                                | 0.0026                 | 0.918          | 1451                                              | 46                    | 1357                                              | 70                    | 1593                                                 | 50                    | 110                         | 70                         | a                 |
| 0.1139                             | 0.0052                 | 0.922                              | 0.045                  | 0.0587                                | 0.0017                 | 0.854          | 663                                               | 24                    | 695                                               | 30                    | 557                                                  | 65                    | 140                         | 50                         | a                 |
| 0.228                              | 0.013                  | 3.01                               | 0.18                   | 0.0958                                | 0.0025                 | 0.919          | 1409                                              | 46                    | 1322                                              | 68                    | 1544                                                 | 50                    | 110                         | 65                         | a                 |
| 0.263                              | 0.017                  | 3.91                               | 0.26                   | 0.1080                                | 0.0029                 | 0.929          | 1616                                              | 54                    | 1503                                              | 86                    | 1766                                                 | 48                    | 90                          | 70                         | a                 |
| 0.1392                             | 0.0068                 | 1.214                              | 0.062                  | 0.0632                                | 0.0018                 | 0.885          | 807                                               | 29                    | 840                                               | 38                    | 716                                                  | 60                    | 145                         | 70                         | a                 |
| 0.1061                             | 0.0048                 | 0.855                              | 0.046                  | 0.0584                                | 0.0030                 | 0.714          | 627                                               | 25                    | 650                                               | 28                    | 545                                                  | 113                   | 165                         | 70                         | a                 |
| 0.1207                             | 0.0058                 | 1.013                              | 0.052                  | 0.0608                                | 0.0018                 | 0.867          | 710                                               | 26                    | 735                                               | 33                    | 634                                                  | 63                    | 80                          | 70                         | a                 |
| 0.1738                             | 0.0089                 | 1.87                               | 0.10                   | 0.0781                                | 0.0021                 | 0.898          | 1071                                              | 36                    | 1033                                              | 49                    | 1149                                                 | 54                    | 155                         | 80                         | a                 |
| 0.1680                             | 0.0086                 | 1.774                              | 0.095                  | 0.0766                                | 0.0020                 | 0.900          | 1036                                              | 35                    | 1001                                              | 48                    | 1110                                                 | 53                    | 90                          | 55                         | a                 |
| 0.0363                             | 0.0015                 | 0.246                              | 0.011                  | 0.0492                                | 0.0017                 | 0.879          | 223                                               | 9                     | 230                                               | 9                     | 156                                                  | 79                    | 250                         | 70                         | a                 |
| 0.1383                             | 0.0068                 | 1.226                              | 0.065                  | 0.0643                                | 0.0023                 | 0.855          | 812                                               | 30                    | 835                                               | 38                    | 751                                                  | 74                    | 110                         | 80                         | a                 |
| 0.389                              | 0.026                  | 8.37                               | 0.59                   | 0.1561                                | 0.0041                 | 0.937          | 2272                                              | 64                    | 2118                                              | 122                   | 2414                                                 | 44                    | 85                          | 50                         | a                 |
| 0.445                              | 0.034                  | 11.61                              | 0.92                   | 0.1894                                | 0.0050                 | 0.941          | 2573                                              | 74                    | 2371                                              | 151                   | 2737                                                 | 43                    | 105                         | 40                         | a                 |
| 0.191                              | 0.011                  | 2.13                               | 0.15                   | 0.0811                                | 0.0041                 | 0.848          | 1158                                              | 48                    | 1124                                              | 62                    | 1223                                                 | 100                   | 90                          | 60                         | a                 |
| 0.1032                             | 0.0047                 | 0.838                              | 0.040                  | 0.0589                                | 0.0016                 | 0.847          | 618                                               | 22                    | 633                                               | 27                    | 563                                                  | 61                    | 140                         | 55                         | a                 |
| 0.195                              | 0.011                  | 2.19                               | 0.13                   | 0.0817                                | 0.0022                 | 0.914          | 1179                                              | 40                    | 1147                                              | 58                    | 1238                                                 | 52                    | 65                          | 55                         | a                 |
| 0.1214                             | 0.0060                 | 1.037                              | 0.058                  | 0.0619                                | 0.0026                 | 0.807          | 722                                               | 29                    | 739                                               | 35                    | 672                                                  | 91                    | 70                          | 65                         | a                 |
| 0.1686                             | 0.0085                 | 1.749                              | 0.094                  | 0.0753                                | 0.0021                 | 0.893          | 1027                                              | 35                    | 1004                                              | 47                    | 1076                                                 | 57                    | 70                          | 55                         | a                 |
| 0.1183                             | 0.0055                 | 1.007                              | 0.055                  | 0.0617                                | 0.0029                 | 0.764          | 707                                               | 28                    | 721                                               | 32                    | 665                                                  | 102                   | 260                         | 50                         | a                 |
| 0.0610                             | 0.0026                 | 0.446                              | 0.020                  | 0.0531                                | 0.0016                 | 0.706          | 375                                               | 14                    | 381                                               | 16                    | 333                                                  | 70                    | 175                         | 75                         | a                 |
| 0.229                              | 0.013                  | 2.79                               | 0.16                   | 0.0884                                | 0.0023                 | 0.923          | 1352                                              | 44                    | 1328                                              | 67                    | 1392                                                 | 51                    | 105                         | 80                         | a                 |
| 0.273                              | 0.016                  | 3.78                               | 0.24                   | 0.1006                                | 0.0028                 | 0.926          | 1589                                              | 50                    | 1554                                              | 81                    | 1635                                                 | 53                    | 75                          | 50                         | a                 |
| 0.209                              | 0.012                  | 2.40                               | 0.14                   | 0.0833                                | 0.0023                 | 0.918          | 1244                                              | 43                    | 1224                                              | 63                    | 1277                                                 | 54                    | 101                         | 65                         | a                 |
| 0.214                              | 0.012                  | 2.48                               | 0.15                   | 0.0844                                | 0.0022                 | 0.921          | 1267                                              | 42                    | 1248                                              | 63                    | 1301                                                 | 51                    | 105                         | 55                         | a                 |
| 0.202                              | 0.011                  | 2.25                               | 0.13                   | 0.0811                                | 0.0022                 | 0.918          | 1198                                              | 42                    | 1184                                              | 61                    | 1223                                                 | 53                    | 105                         | 50                         | a                 |
| 0.367                              | 0.023                  | 6.54                               | 0.45                   | 0.1294                                | 0.0039                 | 0.932          | 2052                                              | 60                    | 2014                                              | 111                   | 2090                                                 | 53                    | 125                         | 50                         | a                 |
| 0.0655                             | 0.0029                 | 0.493                              | 0.029                  | 0.0545                                | 0.0040                 | 0.891          | 407                                               | 20                    | 409                                               | 18                    | 393                                                  | 163                   | 130                         | 65                         | a                 |
| 0.206                              | 0.012                  | 2.31                               | 0.14                   | 0.0814                                | 0.0024                 | 0.916          | 1215                                              | 43                    | 1207                                              | 64                    | 1230                                                 | 57                    | 90                          | 65                         | a                 |
| 0.202                              | 0.011                  | 2.24                               | 0.13                   | 0.0803                                | 0.0021                 | 0.919          | 1193                                              | 41                    | 1186                                              | 60                    | 1204                                                 | 53                    | 105                         | 75                         | a                 |
| 0.1796                             | 0.0095                 | 1.87                               | 0.10                   | 0.0754                                | 0.0021                 | 0.908          | 1070                                              | 37                    | 1065                                              | 52                    | 1080                                                 | 55                    | 160                         | 60                         | a                 |
| 0.241                              | 0.014                  | 2.97                               | 0.18                   | 0.0893                                | 0.0025                 | 0.926          | 1401                                              | 47                    | 1394                                              | 74                    | 1411                                                 | 54                    | 75                          | 60                         | a                 |
| 0.269                              | 0.016                  | 3.56                               | 0.22                   | 0.0961                                | 0.0028                 | 0.925          | 1542                                              | 49                    | 1536                                              | 80                    | 1549                                                 | 55                    | 180                         | 65                         | a                 |
| 0.251                              | 0.014                  | 3.16                               | 0.19                   | 0.0913                                | 0.0025                 | 0.927          | 1448                                              | 47                    | 1444                                              | 75                    | 1453                                                 | 52                    | 90                          | 50                         | a                 |
| 0.187                              | 0.010                  | 1.98                               | 0.11                   | 0.0766                                | 0.0021                 | 0.912          | 1109                                              | 39                    | 1108                                              | 55                    | 1111                                                 | 55                    | 115                         | 60                         | a                 |
| 0.1783                             | 0.0093                 | 1.83                               | 0.10                   | 0.0746                                | 0.0021                 | 0.905          | 1058                                              | 36                    | 1058                                              | 51                    | 1057                                                 | 56                    | 130                         | 45                         | a                 |
| 0.282                              | 0.018                  | 3.84                               | 0.25                   | 0.0987                                | 0.0030                 | 0.929          | 1602                                              | 53                    | 1602                                              | 88                    | 1600                                                 | 57                    | 80                          | 70                         | a                 |
| 0.288                              | 0.017                  | 3.97                               | 0.25                   | 0.1000                                | 0.0027                 | 0.935          | 1628                                              | 51                    | 1630                                              | 86                    | 1625                                                 | 50                    | 95                          | 65                         | a                 |
| 0.1582                             | 0.0081                 | 1.543                              | 0.085                  | 0.0707                                | 0.0023                 | 0.878          | 948                                               | 34                    | 947                                               | 45                    | 950                                                  | 67                    | 90                          | 55                         | a                 |
| 0.232                              | 0.013                  | 2.75                               | 0.16                   | 0.0860                                | 0.0023                 | 0.927          | 1341                                              | 45                    | 1343                                              | 69                    | 1338                                                 | 52                    | 130                         | 85                         | a                 |
| 0.1678                             | 0.0086                 | 1.671                              | 0.090                  | 0.0722                                | 0.0019                 | 0.905          | 998                                               | 34                    | 1000                                              | 48                    | 992                                                  | 54                    | 110                         | 55                         | a                 |
| 0.352                              | 0.025                  | 5.68                               | 0.42                   | 0.1171                                | 0.0031                 | 0.949          | 1928                                              | 64                    | 1943                                              | 120                   | 1913                                                 | 47                    | 70                          | 50                         | a                 |
| 0.0498                             | 0.0021                 | 0.363                              | 0.017                  | 0.0528                                | 0.0016                 | 0.645          | 314                                               | 12                    | 313                                               | 13                    | 321                                                  | 68                    | 155                         | 70                         | a                 |
| 0.199                              | 0.011                  | 2.15                               | 0.13                   | 0.0784                                | 0.0024                 | 0.906          | 1165                                              | 41                    | 1170                                              | 59                    | 1156                                                 | 61                    | 70                          | 50                         | a                 |
| 0.0422                             | 0.0018                 | 0.302                              | 0.014                  | 0.0518                                | 0.0016                 | 0.546          | 268                                               | 11                    | 266                                               | 11                    | 278                                                  | 70                    | 135                         | 70                         | a                 |
| 0.279                              | 0.016                  | 3.72                               | 0.23                   | 0.0964                                | 0.0026                 | 0.935          | 1575                                              | 49                    | 1589                                              | 83                    | 1556                                                 | 50                    | 100                         | 80                         | a                 |
| 0.228                              | 0.013                  | 2.64                               | 0.16                   | 0.0839                                | 0.0023                 | 0.925          | 1311                                              | 44                    | 1324                                              | 68                    | 1291                                                 | 53                    | 80                          | 55                         | a                 |
| 0.180                              | 0.010                  | 1.83                               | 0.11                   | 0.0739                                | 0.0022                 | 0.909          | 1057                                              | 40                    | 1066                                              | 56                    | 1040                                                 | 60                    | 145                         | 75                         | a                 |
| 0.1789                             | 0.0097                 | 1.82                               | 0.10                   | 0.0737                                | 0.0020                 | 0.913          | 1052                                              | 37                    | 1061                                              | 53                    | 1034                                                 | 54                    | 100                         | 80                         | a                 |
| 0.236                              | 0.015                  | 2.79                               | 0.21                   | 0.0855                                | 0.0057                 | 0.836          | 1352                                              | 57                    | 1367                                              | 76                    | 1328                                                 | 128                   | 95                          | 70                         | a                 |
| 0.241                              | 0.014                  | 2.87                               | 0.17                   | 0.0865                                | 0.0023                 | 0.931          | 1375                                              | 45                    | 1393                                              | 71                    | 1348                                                 | 51                    | 115                         | 70                         | a                 |
| 0.352                              | 0.022                  | 5.50                               | 0.36                   | 0.1135                                | 0.0030                 | 0.944          | 1901                                              | 57                    | 1943                                              | 105                   | 1856                                                 | 48                    | 80                          | 65                         | a                 |

| $^{206}\text{Pb}^*/^{238}\text{U}$ | $\pm 2\sigma$<br>(abs) | $^{207}\text{Pb}^*/^{235}\text{U}$ | $\pm 2\sigma$<br>(abs) | $^{207}\text{Pb}^*/^{206}\text{Pb}^*$ | $\pm 2\sigma$<br>(abs) | corr.<br>coef. | $^{206}\text{Pb}^*/^{238}\text{U}$<br>age<br>(Ma) | $\pm 2\sigma$<br>(Ma) | $^{207}\text{Pb}^*/^{235}\text{U}$<br>age<br>(Ma) | $\pm 2\sigma$<br>(Ma) | $^{207}\text{Pb}^*/^{206}\text{Pb}^*$<br>age<br>(Ma) | $\pm 2\sigma$<br>(Ma) | Length<br>( $\mu\text{m}$ ) | Width<br>( $\mu\text{m}$ ) | Accept/<br>Reject |
|------------------------------------|------------------------|------------------------------------|------------------------|---------------------------------------|------------------------|----------------|---------------------------------------------------|-----------------------|---------------------------------------------------|-----------------------|------------------------------------------------------|-----------------------|-----------------------------|----------------------------|-------------------|
| 0.1060                             | 0.0050                 | 0.907                              | 0.046                  | 0.0620                                | 0.0020                 | 0.824          | 655                                               | 25                    | 650                                               | 29                    | 675                                                  | 69                    | 130                         | 75                         | a                 |
| 0.0949                             | 0.0046                 | 0.787                              | 0.040                  | 0.0601                                | 0.0017                 | 0.840          | 589                                               | 23                    | 584                                               | 27                    | 609                                                  | 60                    | 115                         | 70                         | a                 |
| 0.1085                             | 0.0050                 | 0.934                              | 0.046                  | 0.0625                                | 0.0020                 | 0.825          | 670                                               | 24                    | 664                                               | 29                    | 690                                                  | 68                    | 135                         | 65                         | a                 |
| 0.0436                             | 0.0018                 | 0.315                              | 0.014                  | 0.0523                                | 0.0017                 | 0.532          | 278                                               | 11                    | 275                                               | 11                    | 299                                                  | 73                    | 115                         | 85                         | a                 |
| 0.227                              | 0.013                  | 2.59                               | 0.17                   | 0.0828                                | 0.0038                 | 0.875          | 1298                                              | 47                    | 1318                                              | 67                    | 1266                                                 | 90                    | 140                         | 60                         | a                 |
| 0.01078                            | 0.00059                | 0.071                              | 0.018                  | 0.048                                 | 0.024                  | *              | 70                                                | 17                    | 69                                                | 4                     | 99                                                   | 1182                  | 125                         | 75                         | a                 |
| 0.1451                             | 0.0071                 | 1.391                              | 0.076                  | 0.0695                                | 0.0029                 | 0.824          | 885                                               | 32                    | 874                                               | 40                    | 913                                                  | 85                    | 190                         | 60                         | a                 |
| 0.197                              | 0.011                  | 2.06                               | 0.12                   | 0.0757                                | 0.0020                 | 0.923          | 1136                                              | 41                    | 1161                                              | 60                    | 1088                                                 | 54                    | 95                          | 55                         | a                 |
| 0.0346                             | 0.0014                 | 0.246                              | 0.011                  | 0.0515                                | 0.0014                 | 0.458          | 223                                               | 9                     | 219                                               | 9                     | 263                                                  | 64                    | 115                         | 55                         | a                 |
| 0.211                              | 0.012                  | 2.28                               | 0.13                   | 0.0782                                | 0.0021                 | 0.926          | 1206                                              | 41                    | 1236                                              | 63                    | 1153                                                 | 52                    | 90                          | 75                         | a                 |
| 0.0684                             | 0.0030                 | 0.533                              | 0.025                  | 0.0566                                | 0.0016                 | 0.763          | 434                                               | 16                    | 426                                               | 18                    | 474                                                  | 61                    | 90                          | 50                         | a                 |
| 0.1635                             | 0.0082                 | 1.662                              | 0.087                  | 0.0737                                | 0.0020                 | 0.896          | 994                                               | 33                    | 976                                               | 45                    | 1034                                                 | 55                    | 100                         | 80                         | a                 |
| 0.0716                             | 0.0031                 | 0.564                              | 0.029                  | 0.0571                                | 0.0028                 | 0.549          | 454                                               | 19                    | 446                                               | 19                    | 497                                                  | 108                   | 85                          | 65                         | a                 |
| 0.210                              | 0.012                  | 2.25                               | 0.13                   | 0.0777                                | 0.0021                 | 0.926          | 1197                                              | 42                    | 1230                                              | 64                    | 1139                                                 | 53                    | 110                         | 70                         | a                 |
| 0.283                              | 0.017                  | 3.54                               | 0.22                   | 0.0908                                | 0.0024                 | 0.940          | 1535                                              | 49                    | 1604                                              | 84                    | 1442                                                 | 50                    | 125                         | 80                         | a                 |
| 0.199                              | 0.011                  | 2.06                               | 0.12                   | 0.0749                                | 0.0020                 | 0.922          | 1135                                              | 39                    | 1171                                              | 59                    | 1067                                                 | 53                    | 105                         | 65                         | a                 |
| 0.131                              | 0.011                  | 1.22                               | 0.14                   | 0.0679                                | 0.0091                 | 0.607          | 811                                               | 64                    | 792                                               | 63                    | 864                                                  | 278                   | 60                          | 40                         | a                 |
| 0.0498                             | 0.0021                 | 0.372                              | 0.017                  | 0.0542                                | 0.0015                 | 0.653          | 321                                               | 12                    | 313                                               | 13                    | 378                                                  | 63                    | 85                          | 55                         | a                 |
| 0.1135                             | 0.0052                 | 1.013                              | 0.049                  | 0.0647                                | 0.0017                 | 0.856          | 711                                               | 25                    | 693                                               | 30                    | 766                                                  | 57                    | 90                          | 55                         | a                 |
| 0.1640                             | 0.0084                 | 1.689                              | 0.091                  | 0.0747                                | 0.0020                 | 0.898          | 1004                                              | 34                    | 979                                               | 46                    | 1060                                                 | 54                    | 120                         | 80                         | a                 |
| 0.253                              | 0.015                  | 2.91                               | 0.19                   | 0.0835                                | 0.0028                 | 0.920          | 1385                                              | 48                    | 1454                                              | 77                    | 1281                                                 | 66                    | 75                          | 70                         | a                 |
| 0.02046                            | 0.00084                | 0.1415                             | 0.0072                 | 0.0501                                | 0.0030                 | 0.663          | 134                                               | 6                     | 131                                               | 5                     | 201                                                  | 141                   | 115                         | 65                         | a                 |
| 0.1245                             | 0.0060                 | 1.153                              | 0.059                  | 0.0672                                | 0.0021                 | 0.845          | 779                                               | 28                    | 756                                               | 34                    | 843                                                  | 66                    | 120                         | 75                         | a                 |
| 0.0479                             | 0.0021                 | 0.358                              | 0.016                  | 0.0542                                | 0.0016                 | 0.622          | 311                                               | 12                    | 302                                               | 13                    | 379                                                  | 66                    | 205                         | 70                         | a                 |
| 0.0942                             | 0.0042                 | 0.802                              | 0.038                  | 0.0617                                | 0.0018                 | 0.810          | 598                                               | 21                    | 580                                               | 25                    | 665                                                  | 63                    | 160                         | 100                        | a                 |
| 0.1581                             | 0.0084                 | 1.621                              | 0.090                  | 0.0743                                | 0.0020                 | 0.897          | 978                                               | 35                    | 946                                               | 47                    | 1050                                                 | 55                    | 155                         | 75                         | a                 |
| 0.253                              | 0.015                  | 2.83                               | 0.17                   | 0.0813                                | 0.0021                 | 0.939          | 1364                                              | 46                    | 1452                                              | 76                    | 1228                                                 | 51                    | 100                         | 50                         | a                 |
| 0.233                              | 0.013                  | 2.51                               | 0.15                   | 0.0782                                | 0.0021                 | 0.933          | 1274                                              | 43                    | 1348                                              | 69                    | 1152                                                 | 53                    | 105                         | 65                         | a                 |
| 0.0672                             | 0.0029                 | 0.533                              | 0.029                  | 0.0575                                | 0.0036                 | 0.901          | 434                                               | 19                    | 420                                               | 18                    | 512                                                  | 138                   | 95                          | 65                         | a                 |
| 0.1575                             | 0.0081                 | 1.616                              | 0.087                  | 0.0744                                | 0.0020                 | 0.897          | 977                                               | 34                    | 943                                               | 45                    | 1053                                                 | 53                    | 130                         | 60                         | a                 |
| 0.0384                             | 0.0016                 | 0.282                              | 0.013                  | 0.0532                                | 0.0021                 | 0.870          | 252                                               | 10                    | 243                                               | 10                    | 339                                                  | 90                    | 130                         | 145                        | a                 |
| 0.0820                             | 0.0037                 | 0.684                              | 0.041                  | 0.0605                                | 0.0044                 | 0.913          | 529                                               | 25                    | 508                                               | 22                    | 620                                                  | 157                   | 105                         | 70                         | a                 |
| 0.0380                             | 0.0016                 | 0.280                              | 0.015                  | 0.0534                                | 0.0035                 | 0.815          | 250                                               | 12                    | 240                                               | 10                    | 346                                                  | 148                   | 155                         | 80                         | a                 |
| 0.0753                             | 0.0033                 | 0.616                              | 0.028                  | 0.0594                                | 0.0017                 | 0.769          | 487                                               | 18                    | 468                                               | 20                    | 581                                                  | 62                    | 135                         | 75                         | a                 |
| 0.1014                             | 0.0049                 | 0.896                              | 0.048                  | 0.0641                                | 0.0027                 | 0.756          | 650                                               | 26                    | 623                                               | 28                    | 744                                                  | 88                    | 140                         | 60                         | a                 |
| 0.0575                             | 0.0025                 | 0.449                              | 0.021                  | 0.0566                                | 0.0017                 | 0.681          | 376                                               | 15                    | 361                                               | 15                    | 475                                                  | 66                    | 85                          | 70                         | a                 |
| 0.1525                             | 0.0075                 | 1.562                              | 0.081                  | 0.0743                                | 0.0021                 | 0.878          | 955                                               | 32                    | 915                                               | 42                    | 1049                                                 | 58                    | 115                         | 65                         | a                 |
| 0.0643                             | 0.0028                 | 0.512                              | 0.024                  | 0.0578                                | 0.0016                 | 0.739          | 420                                               | 16                    | 402                                               | 17                    | 521                                                  | 61                    | 95                          | 65                         | a                 |
| 0.1546                             | 0.0076                 | 1.597                              | 0.083                  | 0.0750                                | 0.0021                 | 0.882          | 969                                               | 33                    | 926                                               | 43                    | 1067                                                 | 57                    | 130                         | 100                        | a                 |
| 0.1094                             | 0.0060                 | 0.994                              | 0.082                  | 0.0659                                | 0.0074                 | 0.927          | 701                                               | 42                    | 669                                               | 35                    | 804                                                  | 236                   | 115                         | 80                         | a                 |
| 0.1505                             | 0.0075                 | 1.544                              | 0.082                  | 0.0744                                | 0.0021                 | 0.882          | 948                                               | 33                    | 904                                               | 42                    | 1053                                                 | 56                    | 120                         | 60                         | a                 |
| 0.245                              | 0.014                  | 2.56                               | 0.15                   | 0.0759                                | 0.0021                 | 0.936          | 1289                                              | 43                    | 1411                                              | 72                    | 1093                                                 | 54                    | 75                          | 60                         | a                 |
| 0.1559                             | 0.0077                 | 1.627                              | 0.084                  | 0.0757                                | 0.0020                 | 0.887          | 981                                               | 33                    | 934                                               | 43                    | 1087                                                 | 54                    | 165                         | 80                         | a                 |
| 0.1590                             | 0.0087                 | 1.677                              | 0.096                  | 0.0765                                | 0.0021                 | 0.895          | 1000                                              | 37                    | 951                                               | 49                    | 1108                                                 | 56                    | 115                         | 70                         | a                 |
| 0.0329                             | 0.0014                 | 0.241                              | 0.011                  | 0.0533                                | 0.0017                 | 0.876          | 220                                               | 9                     | 208                                               | 9                     | 340                                                  | 72                    | 130                         | 90                         | a                 |
| 0.0448                             | 0.0019                 | 0.343                              | 0.020                  | 0.0554                                | 0.0042                 | 0.830          | 299                                               | 15                    | 283                                               | 12                    | 429                                                  | 170                   | 115                         | 75                         | a                 |
| 0.220                              | 0.015                  | 2.14                               | 0.17                   | 0.0706                                | 0.0040                 | 0.888          | 1162                                              | 55                    | 1282                                              | 80                    | 946                                                  | 116                   | 90                          | 55                         | a                 |
| 0.1414                             | 0.0068                 | 1.443                              | 0.074                  | 0.0740                                | 0.0021                 | 0.869          | 907                                               | 31                    | 852                                               | 38                    | 1042                                                 | 57                    | 180                         | 75                         | a                 |
| 0.1675                             | 0.0085                 | 1.846                              | 0.098                  | 0.0800                                | 0.0021                 | 0.894          | 1062                                              | 35                    | 998                                               | 47                    | 1196                                                 | 52                    | 120                         | 80                         | a                 |
| 0.0632                             | 0.0027                 | 0.513                              | 0.024                  | 0.0589                                | 0.0017                 | 0.704          | 421                                               | 16                    | 395                                               | 17                    | 565                                                  | 64                    | 100                         | 55                         | a                 |
| 0.0508                             | 0.0022                 | 0.400                              | 0.019                  | 0.0571                                | 0.0023                 | 0.902          | 341                                               | 14                    | 319                                               | 13                    | 494                                                  | 90                    | 190                         | 95                         | a                 |

| $^{206}\text{Pb}^*/^{238}\text{U}$ | $\pm 2\sigma$<br>(abs) | $^{207}\text{Pb}^*/^{235}\text{U}$ | $\pm 2\sigma$<br>(abs) | $^{207}\text{Pb}^*/^{206}\text{Pb}^*$ | $\pm 2\sigma$<br>(abs) | corr.<br>coef. | $^{206}\text{Pb}^*/^{238}\text{U}$<br>age<br>(Ma) | $\pm 2\sigma$<br>(Ma) | $^{207}\text{Pb}^*/^{235}\text{U}$<br>age<br>(Ma) | $\pm 2\sigma$<br>(Ma) | $^{207}\text{Pb}^*/^{206}\text{Pb}^*$<br>age<br>(Ma) | $\pm 2\sigma$<br>(Ma) | Length<br>( $\mu\text{m}$ ) | Width<br>( $\mu\text{m}$ ) | Accept/<br>Reject |
|------------------------------------|------------------------|------------------------------------|------------------------|---------------------------------------|------------------------|----------------|---------------------------------------------------|-----------------------|---------------------------------------------------|-----------------------|------------------------------------------------------|-----------------------|-----------------------------|----------------------------|-------------------|
| 0.1514                             | 0.0077                 | 1.604                              | 0.086                  | 0.0768                                | 0.0022                 | 0.878          | 972                                               | 34                    | 909                                               | 43                    | 1117                                                 | 57                    | 80                          | 50                         | a                 |
| 0.1279                             | 0.0061                 | 1.267                              | 0.064                  | 0.0718                                | 0.0019                 | 0.866          | 831                                               | 29                    | 776                                               | 35                    | 982                                                  | 54                    | 105                         | 60                         | a                 |
| 0.0939                             | 0.0043                 | 0.843                              | 0.043                  | 0.0651                                | 0.0025                 | 0.741          | 621                                               | 24                    | 579                                               | 26                    | 777                                                  | 81                    | 145                         | 60                         | a                 |
| 0.0446                             | 0.0020                 | 0.351                              | 0.018                  | 0.0570                                | 0.0025                 | 0.888          | 305                                               | 13                    | 281                                               | 12                    | 490                                                  | 95                    | 90                          | 50                         | a                 |
| 0.1415                             | 0.0069                 | 1.498                              | 0.077                  | 0.0768                                | 0.0021                 | 0.873          | 929                                               | 31                    | 853                                               | 39                    | 1115                                                 | 54                    | 95                          | 50                         | a                 |
| 0.1610                             | 0.0080                 | 1.815                              | 0.096                  | 0.0817                                | 0.0024                 | 0.873          | 1051                                              | 35                    | 963                                               | 44                    | 1239                                                 | 58                    | 140                         | 70                         | a                 |
| 0.1337                             | 0.0064                 | 1.393                              | 0.078                  | 0.0756                                | 0.0037                 | 0.746          | 886                                               | 33                    | 809                                               | 36                    | 1084                                                 | 98                    | 135                         | 70                         | a                 |
| 0.0207                             | 0.0026                 | 0.154                              | 0.020                  | 0.0537                                | 0.0026                 | 0.462          | 145                                               | 18                    | 132                                               | 17                    | 360                                                  | 110                   | 195                         | 90                         | a                 |
| 0.1434                             | 0.0069                 | 1.573                              | 0.080                  | 0.0796                                | 0.0022                 | 0.864          | 960                                               | 31                    | 864                                               | 39                    | 1187                                                 | 55                    | 130                         | 75                         | a                 |
| 0.0355                             | 0.0015                 | 0.280                              | 0.015                  | 0.0571                                | 0.0035                 | 0.810          | 250                                               | 12                    | 225                                               | 9                     | 496                                                  | 137                   | 110                         | 88                         | a                 |
| 0.1234                             | 0.0059                 | 1.280                              | 0.066                  | 0.0753                                | 0.0026                 | 0.813          | 837                                               | 29                    | 750                                               | 34                    | 1076                                                 | 68                    | 110                         | 95                         | a                 |
| 0.1584                             | 0.0079                 | 1.84                               | 0.10                   | 0.0844                                | 0.0030                 | 0.840          | 1061                                              | 36                    | 948                                               | 44                    | 1301                                                 | 69                    | 75                          | 60                         | a                 |
| 0.0542                             | 0.0023                 | 0.456                              | 0.027                  | 0.0611                                | 0.0048                 | 0.858          | 381                                               | 19                    | 340                                               | 14                    | 641                                                  | 168                   | 115                         | 75                         | a                 |
| 0.0401                             | 0.0018                 | 0.324                              | 0.023                  | 0.0587                                | 0.0063                 | 0.779          | 285                                               | 17                    | 253                                               | 11                    | 555                                                  | 234                   | 170                         | 70                         | a                 |
| 0.00916                            | 0.00041                | 0.068                              | 0.011                  | 0.053                                 | 0.018                  | *              | 66                                                | 11                    | 59                                                | 3                     | 349                                                  | 751                   | 105                         | 85                         | a                 |
| 0.01151                            | 0.00047                | 0.0856                             | 0.0087                 | 0.054                                 | 0.010                  | *              | 83                                                | 8                     | 74                                                | 3                     | 368                                                  | 433                   | 150                         | 90                         | a                 |
| 0.0375                             | 0.0016                 | 0.303                              | 0.014                  | 0.0585                                | 0.0020                 | 0.885          | 268                                               | 11                    | 237                                               | 10                    | 549                                                  | 75                    | 155                         | 75                         | a                 |
| 0.0375                             | 0.0016                 | 0.303                              | 0.023                  | 0.0587                                | 0.0076                 | 0.744          | 269                                               | 18                    | 237                                               | 10                    | 557                                                  | 281                   | 115                         | 60                         | a                 |
| 0.0320                             | 0.0013                 | 0.255                              | 0.015                  | 0.0578                                | 0.0050                 | 0.739          | 231                                               | 12                    | 203                                               | 8                     | 521                                                  | 192                   | 160                         | 80                         | a                 |
| 0.0693                             | 0.0031                 | 0.626                              | 0.041                  | 0.0655                                | 0.0060                 | 0.883          | 493                                               | 26                    | 432                                               | 19                    | 790                                                  | 192                   | 110                         | 55                         | a                 |
| 0.0945                             | 0.0044                 | 0.930                              | 0.055                  | 0.0714                                | 0.0047                 | 0.931          | 668                                               | 29                    | 582                                               | 26                    | 968                                                  | 134                   | 115                         | 100                        | a                 |
| 0.00969                            | 0.00044                | 0.073                              | 0.012                  | 0.054                                 | 0.018                  | *              | 71                                                | 11                    | 62                                                | 3                     | 390                                                  | 727                   | 85                          | 72                         | a                 |
| 0.1283                             | 0.0064                 | 1.412                              | 0.095                  | 0.0798                                | 0.0061                 | 0.518          | 894                                               | 40                    | 778                                               | 36                    | 1193                                                 | 152                   | 135                         | 40                         | a                 |
| 0.00788                            | 0.00058                | 0.059                              | 0.021                  | 0.054                                 | 0.038                  | *              | 58                                                | 20                    | 51                                                | 4                     | 382                                                  | 1592                  | 140                         | 70                         | a                 |
| 0.0599                             | 0.0026                 | 0.530                              | 0.026                  | 0.0642                                | 0.0027                 | 0.916          | 432                                               | 17                    | 375                                               | 16                    | 748                                                  | 89                    | 85                          | 75                         | a                 |
| 0.0477                             | 0.0023                 | 0.409                              | 0.021                  | 0.0622                                | 0.0022                 | 0.492          | 348                                               | 15                    | 300                                               | 14                    | 681                                                  | 77                    | 130                         | 60                         | a                 |
| 0.0878                             | 0.0040                 | 0.888                              | 0.043                  | 0.0733                                | 0.0023                 | 0.747          | 645                                               | 23                    | 543                                               | 23                    | 1023                                                 | 62                    | 80                          | 40                         | a                 |
| 0.0783                             | 0.0042                 | 0.768                              | 0.051                  | 0.0711                                | 0.0051                 | 0.919          | 578                                               | 29                    | 486                                               | 25                    | 960                                                  | 147                   | 175                         | 50                         | a                 |
| 0.00399                            | 0.00016                | 0.0308                             | 0.0022                 | 0.0560                                | 0.0066                 | *              | 31                                                | 2                     | 26                                                | 1                     | 453                                                  | 262                   | 155                         | 85                         | a                 |
| 0.0470                             | 0.0021                 | 0.422                              | 0.027                  | 0.0650                                | 0.0060                 | 0.825          | 357                                               | 20                    | 296                                               | 13                    | 775                                                  | 195                   | 105                         | 80                         | a                 |
| 0.0552                             | 0.0026                 | 0.517                              | 0.033                  | 0.0679                                | 0.0056                 | 0.865          | 423                                               | 22                    | 346                                               | 16                    | 865                                                  | 170                   | 150                         | 45                         | a                 |
| 0.0543                             | 0.0024                 | 0.512                              | 0.028                  | 0.0684                                | 0.0044                 | 0.876          | 420                                               | 19                    | 341                                               | 15                    | 881                                                  | 134                   | 350                         | 40                         | a                 |
| 0.0793                             | 0.0035                 | 0.842                              | 0.041                  | 0.0770                                | 0.0028                 | 0.611          | 620                                               | 22                    | 492                                               | 21                    | 1121                                                 | 74                    | 95                          | 60                         | a                 |
| 0.0452                             | 0.0020                 | 0.431                              | 0.022                  | 0.0692                                | 0.0035                 | 0.874          | 364                                               | 16                    | 285                                               | 12                    | 903                                                  | 104                   | 145                         | 55                         | a                 |
| 0.1175                             | 0.0056                 | 1.490                              | 0.077                  | 0.0920                                | 0.0032                 | 0.752          | 926                                               | 31                    | 716                                               | 32                    | 1467                                                 | 65                    | 135                         | 55                         | a                 |
| 0.0492                             | 0.0021                 | 0.492                              | 0.028                  | 0.0726                                | 0.0049                 | 0.858          | 406                                               | 19                    | 309                                               | 13                    | 1001                                                 | 138                   | 110                         | 70                         | r                 |
| 0.1199                             | 0.0056                 | 1.586                              | 0.079                  | 0.0960                                | 0.0028                 | 0.784          | 965                                               | 31                    | 730                                               | 32                    | 1547                                                 | 55                    | 150                         | 60                         | r                 |
| 0.1232                             | 0.0067                 | 1.76                               | 0.10                   | 0.1039                                | 0.0032                 | 0.799          | 1033                                              | 37                    | 749                                               | 38                    | 1695                                                 | 56                    | 110                         | 55                         | r                 |
| 0.01536                            | 0.00068                | 0.1475                             | 0.0083                 | 0.0696                                | 0.0049                 | 0.514          | 140                                               | 7                     | 98                                                | 4                     | 918                                                  | 144                   | 210                         | 50                         | r                 |
| 0.1565                             | 0.0089                 | 2.83                               | 0.17                   | 0.1312                                | 0.0039                 | 0.815          | 1364                                              | 45                    | 938                                               | 49                    | 2114                                                 | 53                    | 150                         | 95                         | r                 |
| 0.0975                             | 0.0059                 | 1.418                              | 0.089                  | 0.1055                                | 0.0029                 | 0.792          | 896                                               | 37                    | 599                                               | 34                    | 1723                                                 | 50                    | 95                          | 55                         | r                 |
| 0.1135                             | 0.0054                 | 1.845                              | 0.094                  | 0.1179                                | 0.0036                 | 0.702          | 1062                                              | 34                    | 693                                               | 31                    | 1924                                                 | 55                    | 140                         | 70                         | r                 |
| 0.00405                            | 0.00024                | 0.0410                             | 0.0099                 | 0.073                                 | 0.035                  | *              | 41                                                | 10                    | 26                                                | 2                     | 1025                                                 | 973                   | 155                         | 50                         | r                 |
| 0.00796                            | 0.00036                | 0.082                              | 0.010                  | 0.075                                 | 0.018                  | *              | 80                                                | 10                    | 51                                                | 2                     | 1068                                                 | 481                   | 180                         | 80                         | r                 |
| 0.00455                            | 0.00019                | 0.0471                             | 0.0033                 | 0.0751                                | 0.0086                 | *              | 47                                                | 3                     | 29                                                | 1                     | 1071                                                 | 230                   | 95                          | 65                         | r                 |
| 0.0570                             | 0.0034                 | 0.758                              | 0.051                  | 0.0965                                | 0.0048                 | 0.925          | 573                                               | 29                    | 357                                               | 21                    | 1557                                                 | 93                    | 170                         | 60                         | r                 |
| 0.0580                             | 0.0026                 | 0.784                              | 0.061                  | 0.098                                 | 0.012                  | 0.844          | 587                                               | 35                    | 363                                               | 16                    | 1588                                                 | 228                   | 105                         | 50                         | r                 |
| 0.1463                             | 0.0084                 | 3.37                               | 0.29                   | 0.167                                 | 0.018                  | 0.950          | 1497                                              | 68                    | 880                                               | 47                    | 2528                                                 | 183                   | 170                         | 75                         | r                 |
| 0.00431                            | 0.00029                | 0.0561                             | 0.0076                 | 0.094                                 | 0.023                  | *              | 55                                                | 7                     | 28                                                | 2                     | 1517                                                 | 454                   | 110                         | 85                         | r                 |
| 0.01158                            | 0.00053                | 0.242                              | 0.018                  | 0.152                                 | 0.018                  | 0.087          | 220                                               | 15                    | 74                                                | 3                     | 2365                                                 | 199                   | 220                         | 65                         | r                 |
| 0.01195                            | 0.00064                | 0.282                              | 0.031                  | 0.171                                 | 0.033                  | *              | 252                                               | 25                    | 77                                                | 4                     | 2569                                                 | 323                   | 75                          | 60                         | r                 |

| $^{206}\text{Pb}^*/^{238}\text{U}$                     | $\pm 2\sigma$<br>(abs) | $^{207}\text{Pb}^*/^{235}\text{U}$ | $\pm 2\sigma$<br>(abs) | $^{207}\text{Pb}^*/^{206}\text{Pb}^*$ | $\pm 2\sigma$<br>(abs) | corr.<br>coef. | $^{206}\text{Pb}^*/^{238}\text{U}$<br>age<br>(Ma) | $\pm 2\sigma$<br>(Ma) | $^{207}\text{Pb}^*/^{235}\text{U}$<br>age<br>(Ma) | $\pm 2\sigma$<br>(Ma) | $^{207}\text{Pb}^*/^{206}\text{Pb}^*$<br>age<br>(Ma) | $\pm 2\sigma$<br>(Ma) | Length<br>( $\mu\text{m}$ ) | Width<br>( $\mu\text{m}$ ) | Accept/<br>Reject |
|--------------------------------------------------------|------------------------|------------------------------------|------------------------|---------------------------------------|------------------------|----------------|---------------------------------------------------|-----------------------|---------------------------------------------------|-----------------------|------------------------------------------------------|-----------------------|-----------------------------|----------------------------|-------------------|
| <b>7. Solimões River, Brazil (3.7891°S, 62.2238°W)</b> |                        |                                    |                        |                                       |                        |                |                                                   |                       |                                                   |                       |                                                      |                       |                             |                            |                   |
| 0.00898                                                | 0.00047                | 0.015                              | 0.028                  | 0.012                                 | 0.026                  | 0.234          | 15                                                | 28                    | 58                                                | 3                     |                                                      |                       | 165                         | 150                        | r                 |
| 0.00976                                                | 0.00056                | 0.018                              | 0.029                  | 0.013                                 | 0.024                  | 0.327          | 18                                                | 29                    | 63                                                | 4                     |                                                      |                       | 335                         | 100                        | r                 |
| 0.0276                                                 | 0.0014                 | 0.053                              | 0.022                  | 0.0140                                | 0.0055                 |                | 53                                                | 21                    | 176                                               | 9                     |                                                      |                       | 169                         | 91                         | r                 |
| 0.01463                                                | 0.00073                | 0.030                              | 0.017                  | 0.0148                                | 0.0082                 |                | 30                                                | 16                    | 94                                                | 5                     |                                                      |                       | 330                         | 62                         | r                 |
| 0.001648                                               | 0.000082               | 0.004                              | 0.015                  | 0.018                                 | 0.066                  |                | 4                                                 | 15                    | 11                                                | 1                     |                                                      |                       | 320                         | 105                        | r                 |
| 0.00590                                                | 0.00048                | 0.018                              | 0.020                  | 0.022                                 | 0.029                  |                | 18                                                | 20                    | 38                                                | 3                     |                                                      |                       | 300                         | 100                        | r                 |
| 0.01922                                                | 0.00096                | 0.078                              | 0.017                  | 0.0293                                | 0.0064                 |                | 76                                                | 16                    | 123                                               | 6                     |                                                      |                       | 168                         | 127                        | r                 |
| 0.0505                                                 | 0.0025                 | 0.317                              | 0.027                  | 0.0455                                | 0.0037                 |                | 279                                               | 21                    | 318                                               | 16                    |                                                      |                       | 272                         | 99                         | a                 |
| 0.248                                                  | 0.015                  | 4.22                               | 0.30                   | 0.1232                                | 0.0033                 | 0.922          | 1678                                              | 59                    | 1430                                              | 80                    | 2004                                                 | 47                    | 130                         | 100                        | a                 |
| 0.0292                                                 | 0.0012                 | 0.176                              | 0.024                  | 0.0438                                | 0.0064                 | 0.810          | 165                                               | 21                    | 186                                               | 8                     |                                                      |                       | 150                         | 75                         | a                 |
| 0.0274                                                 | 0.0014                 | 0.169                              | 0.013                  | 0.0446                                | 0.0035                 |                | 158                                               | 12                    | 174                                               | 9                     |                                                      |                       | 260                         | 63                         | a                 |
| 0.1720                                                 | 0.0087                 | 2.00                               | 0.15                   | 0.0844                                | 0.0038                 | 0.836          | 1116                                              | 50                    | 1023                                              | 48                    | 1302                                                 | 88                    | 140                         | 150                        | a                 |
| 0.210                                                  | 0.012                  | 2.83                               | 0.18                   | 0.0977                                | 0.0026                 | 0.918          | 1364                                              | 49                    | 1231                                              | 62                    | 1580                                                 | 49                    | 165                         | 110                        | a                 |
| 0.1462                                                 | 0.0072                 | 1.211                              | 0.096                  | 0.0601                                | 0.0034                 | 0.820          | 806                                               | 44                    | 879                                               | 40                    | 607                                                  | 123                   | 265                         | 85                         | a                 |
| 0.00351                                                | 0.00016                | 0.0208                             | 0.0067                 | 0.043                                 | 0.016                  |                | 21                                                | 7                     | 23                                                | 1                     |                                                      |                       | 154                         | 135                        | a                 |
| 0.0945                                                 | 0.0047                 | 0.702                              | 0.072                  | 0.0539                                | 0.0047                 |                | 540                                               | 43                    | 582                                               | 28                    | 365                                                  | 198                   | 160                         | 112                        | a                 |
| 0.0616                                                 | 0.0031                 | 0.423                              | 0.042                  | 0.0498                                | 0.0046                 |                | 358                                               | 30                    | 385                                               | 19                    | 185                                                  | 216                   | 252                         | 103                        | a                 |
| 0.0427                                                 | 0.0017                 | 0.280                              | 0.033                  | 0.0475                                | 0.0060                 | 0.872          | 250                                               | 26                    | 269                                               | 10                    | 76                                                   | 299                   | 135                         | 115                        | a                 |
| 0.0342                                                 | 0.0014                 | 0.223                              | 0.029                  | 0.0472                                | 0.0066                 | 0.838          | 204                                               | 24                    | 217                                               | 9                     | 57                                                   | 334                   | 130                         | 130                        | a                 |
| 0.240                                                  | 0.013                  | 3.34                               | 0.22                   | 0.1011                                | 0.0028                 | 0.923          | 1492                                              | 52                    | 1386                                              | 70                    | 1644                                                 | 51                    | 195                         | 95                         | a                 |
| 0.0482                                                 | 0.0024                 | 0.333                              | 0.015                  | 0.0501                                | 0.0020                 |                | 292                                               | 11                    | 304                                               | 15                    | 197                                                  | 93                    | 253                         | 168                        | a                 |
| 0.0292                                                 | 0.0015                 | 0.192                              | 0.018                  | 0.0477                                | 0.0043                 |                | 179                                               | 15                    | 186                                               | 9                     | 86                                                   | 215                   | 287                         | 111                        | a                 |
| 0.0232                                                 | 0.0011                 | 0.151                              | 0.048                  | 0.047                                 | 0.017                  | 0.746          | 143                                               | 42                    | 148                                               | 7                     | 59                                                   | 870                   | 340                         | 85                         | a                 |
| 0.1711                                                 | 0.0083                 | 1.83                               | 0.12                   | 0.0775                                | 0.0028                 | 0.873          | 1055                                              | 43                    | 1018                                              | 46                    | 1133                                                 | 72                    | 300                         | 105                        | a                 |
| 0.1712                                                 | 0.0093                 | 1.83                               | 0.11                   | 0.0775                                | 0.0021                 | 0.915          | 1055                                              | 41                    | 1018                                              | 51                    | 1133                                                 | 53                    | 135                         | 105                        | a                 |
| 0.0305                                                 | 0.0011                 | 0.204                              | 0.016                  | 0.0484                                | 0.0039                 | 0.828          | 188                                               | 14                    | 194                                               | 7                     | 120                                                  | 190                   | 285                         | 185                        | a                 |
| 0.0398                                                 | 0.0020                 | 0.273                              | 0.018                  | 0.0496                                | 0.0030                 |                | 245                                               | 14                    | 252                                               | 12                    | 178                                                  | 143                   | 298                         | 139                        | a                 |
| 0.0318                                                 | 0.0013                 | 0.213                              | 0.042                  | 0.049                                 | 0.011                  | 0.821          | 196                                               | 35                    | 202                                               | 8                     | 133                                                  | 516                   | 150                         | 150                        | a                 |
| 0.0421                                                 | 0.0021                 | 0.292                              | 0.016                  | 0.0503                                | 0.0026                 |                | 260                                               | 12                    | 266                                               | 13                    | 207                                                  | 118                   | 248                         | 105                        | a                 |
| 0.0465                                                 | 0.0023                 | 0.326                              | 0.016                  | 0.0509                                | 0.0022                 |                | 287                                               | 12                    | 293                                               | 14                    | 238                                                  | 102                   | 190                         | 80                         | a                 |
| 0.0313                                                 | 0.0012                 | 0.211                              | 0.013                  | 0.0490                                | 0.0029                 | 0.848          | 194                                               | 11                    | 198                                               | 7                     | 146                                                  | 138                   | 265                         | 100                        | a                 |
| 0.0432                                                 | 0.0022                 | 0.302                              | 0.016                  | 0.0507                                | 0.0025                 |                | 268                                               | 12                    | 272                                               | 13                    | 226                                                  | 112                   | 370                         | 77                         | a                 |
| 0.0423                                                 | 0.0021                 | 0.296                              | 0.013                  | 0.0506                                | 0.0021                 |                | 263                                               | 10                    | 267                                               | 13                    | 223                                                  | 97                    | 239                         | 114                        | a                 |
| 0.0497                                                 | 0.0022                 | 0.354                              | 0.045                  | 0.0516                                | 0.0066                 | 0.896          | 308                                               | 34                    | 313                                               | 14                    | 269                                                  | 295                   | 200                         | 150                        | a                 |
| 0.225                                                  | 0.011                  | 2.55                               | 0.17                   | 0.0822                                | 0.0032                 |                | 1285                                              | 48                    | 1306                                              | 59                    | 1250                                                 | 76                    | 152                         | 74                         | a                 |
| 0.0231                                                 | 0.0010                 | 0.1536                             | 0.0087                 | 0.0483                                | 0.0019                 | 0.843          | 145                                               | 8                     | 147                                               | 6                     | 113                                                  | 94                    | 130                         | 70                         | a                 |
| 0.0654                                                 | 0.0026                 | 0.487                              | 0.035                  | 0.0540                                | 0.0035                 | 0.481          | 403                                               | 24                    | 408                                               | 16                    | 373                                                  | 147                   | 195                         | 95                         | a                 |
| 0.0413                                                 | 0.0017                 | 0.289                              | 0.048                  | 0.0508                                | 0.0094                 | 0.863          | 258                                               | 38                    | 261                                               | 10                    | 232                                                  | 426                   | 220                         | 125                        | a                 |
| 0.0467                                                 | 0.0018                 | 0.332                              | 0.023                  | 0.0516                                | 0.0033                 | 0.899          | 291                                               | 18                    | 294                                               | 11                    | 267                                                  | 146                   | 245                         | 100                        | a                 |
| 0.0529                                                 | 0.0024                 | 0.383                              | 0.045                  | 0.0525                                | 0.0063                 | 0.901          | 329                                               | 33                    | 332                                               | 15                    | 306                                                  | 272                   | 235                         | 135                        | a                 |
| 0.0490                                                 | 0.0024                 | 0.352                              | 0.017                  | 0.0521                                | 0.0023                 |                | 306                                               | 13                    | 308                                               | 15                    | 291                                                  | 100                   | 153                         | 131                        | a                 |
| 0.0450                                                 | 0.0017                 | 0.320                              | 0.018                  | 0.0516                                | 0.0022                 | 0.497          | 282                                               | 14                    | 284                                               | 11                    | 266                                                  | 99                    | 260                         | 125                        | a                 |
| 0.0340                                                 | 0.0013                 | 0.235                              | 0.011                  | 0.0501                                | 0.0015                 | 0.518          | 214                                               | 9                     | 215                                               | 8                     | 198                                                  | 71                    | 170                         | 130                        | a                 |
| 0.0536                                                 | 0.0027                 | 0.390                              | 0.019                  | 0.0528                                | 0.0024                 | 0.000          | 334                                               | 14                    | 336                                               | 16                    | 321                                                  | 102                   | 258                         | 92                         | a                 |
| 0.0460                                                 | 0.0019                 | 0.330                              | 0.016                  | 0.0521                                | 0.0015                 | 0.688          | 290                                               | 12                    | 290                                               | 12                    | 288                                                  | 65                    | 205                         | 85                         | a                 |
| 0.0421                                                 | 0.0021                 | 0.299                              | 0.014                  | 0.0516                                | 0.0023                 |                | 266                                               | 11                    | 266                                               | 13                    | 267                                                  | 103                   | 255                         | 109                        | a                 |
| 0.0471                                                 | 0.0018                 | 0.339                              | 0.015                  | 0.0523                                | 0.0015                 | 0.660          | 297                                               | 12                    | 296                                               | 11                    | 298                                                  | 66                    | 235                         | 80                         | a                 |
| 0.0419                                                 | 0.0021                 | 0.298                              | 0.013                  | 0.0516                                | 0.0020                 | 0.000          | 265                                               | 10                    | 265                                               | 13                    | 266                                                  | 91                    | 207                         | 108                        | a                 |
| 0.01699                                                | 0.00074                | 0.113                              | 0.015                  | 0.0483                                | 0.0068                 | 0.672          | 109                                               | 13                    | 109                                               | 5                     | 114                                                  | 333                   | 185                         | 150                        | a                 |
| 0.01408                                                | 0.00053                | 0.0931                             | 0.0094                 | 0.0479                                | 0.0052                 | 0.607          | 90                                                | 9                     | 90                                                | 3                     | 96                                                   | 258                   | 185                         | 110                        | a                 |

| $^{206}\text{Pb}^*/^{238}\text{U}$ | $\pm 2\sigma$<br>(abs) | $^{207}\text{Pb}^*/^{235}\text{U}$ | $\pm 2\sigma$<br>(abs) | $^{207}\text{Pb}^*/^{206}\text{Pb}^*$ | $\pm 2\sigma$<br>(abs) | corr.<br>coef. | $^{206}\text{Pb}^*/^{238}\text{U}$<br>age<br>(Ma) | $\pm 2\sigma$<br>(Ma) | $^{207}\text{Pb}^*/^{235}\text{U}$<br>age<br>(Ma) | $\pm 2\sigma$<br>(Ma) | $^{207}\text{Pb}^*/^{206}\text{Pb}^*$<br>age<br>(Ma) | $\pm 2\sigma$<br>(Ma) | Length<br>( $\mu\text{m}$ ) | Width<br>( $\mu\text{m}$ ) | Accept/<br>Reject |
|------------------------------------|------------------------|------------------------------------|------------------------|---------------------------------------|------------------------|----------------|---------------------------------------------------|-----------------------|---------------------------------------------------|-----------------------|------------------------------------------------------|-----------------------|-----------------------------|----------------------------|-------------------|
| 0.0376                             | 0.0019                 | 0.265                              | 0.017                  | 0.0512                                | 0.0031                 |                | 239                                               | 13                    | 238                                               | 12                    | 248                                                  | 138                   | 167                         | 105                        | a                 |
| 0.0725                             | 0.0036                 | 0.564                              | 0.029                  | 0.0564                                | 0.0026                 |                | 454                                               | 19                    | 451                                               | 22                    | 467                                                  | 101                   | 211                         | 126                        | a                 |
| 0.1685                             | 0.0098                 | 1.67                               | 0.11                   | 0.0719                                | 0.0020                 | 0.923          | 997                                               | 42                    | 1004                                              | 54                    | 983                                                  | 56                    | 115                         | 95                         | a                 |
| 0.0414                             | 0.0021                 | 0.296                              | 0.015                  | 0.0519                                | 0.0025                 |                | 263                                               | 12                    | 262                                               | 13                    | 280                                                  | 109                   | 168                         | 127                        | a                 |
| 0.186                              | 0.011                  | 1.92                               | 0.13                   | 0.0748                                | 0.0022                 | 0.920          | 1088                                              | 46                    | 1100                                              | 57                    | 1064                                                 | 60                    | 200                         | 70                         | a                 |
| 0.0521                             | 0.0020                 | 0.385                              | 0.019                  | 0.0535                                | 0.0018                 | 0.641          | 331                                               | 14                    | 328                                               | 12                    | 352                                                  | 76                    | 200                         | 90                         | a                 |
| 0.0505                             | 0.0019                 | 0.372                              | 0.023                  | 0.0534                                | 0.0028                 | 0.911          | 321                                               | 17                    | 318                                               | 12                    | 344                                                  | 120                   | 205                         | 125                        | a                 |
| 0.0471                             | 0.0018                 | 0.344                              | 0.019                  | 0.0529                                | 0.0023                 | 0.506          | 300                                               | 14                    | 297                                               | 11                    | 325                                                  | 98                    | 215                         | 135                        | a                 |
| 0.1059                             | 0.0053                 | 0.908                              | 0.045                  | 0.0622                                | 0.0025                 |                | 656                                               | 24                    | 649                                               | 31                    | 682                                                  | 85                    | 194                         | 125                        | a                 |
| 0.0626                             | 0.0031                 | 0.477                              | 0.047                  | 0.0553                                | 0.0050                 |                | 396                                               | 32                    | 391                                               | 19                    | 424                                                  | 202                   | 229                         | 59                         | a                 |
| 0.0520                             | 0.0023                 | 0.386                              | 0.023                  | 0.0538                                | 0.0022                 | 0.621          | 331                                               | 17                    | 327                                               | 14                    | 361                                                  | 94                    | 195                         | 125                        | a                 |
| 0.1150                             | 0.0058                 | 1.015                              | 0.056                  | 0.0640                                | 0.0028                 |                | 711                                               | 28                    | 702                                               | 33                    | 740                                                  | 93                    | 317                         | 87                         | a                 |
| 0.1230                             | 0.0062                 | 1.110                              | 0.060                  | 0.0654                                | 0.0027                 |                | 758                                               | 29                    | 748                                               | 35                    | 788                                                  | 88                    | 191                         | 101                        | a                 |
| 0.0446                             | 0.0017                 | 0.325                              | 0.017                  | 0.0528                                | 0.0021                 | 0.532          | 286                                               | 13                    | 282                                               | 11                    | 320                                                  | 89                    | 160                         | 100                        | a                 |
| 0.0507                             | 0.0019                 | 0.376                              | 0.018                  | 0.0537                                | 0.0018                 | 0.640          | 324                                               | 13                    | 319                                               | 12                    | 359                                                  | 74                    | 200                         | 150                        | a                 |
| 0.0440                             | 0.0017                 | 0.320                              | 0.015                  | 0.0527                                | 0.0017                 | 0.596          | 282                                               | 12                    | 278                                               | 10                    | 318                                                  | 74                    | 150                         | 115                        | a                 |
| 0.01015                            | 0.00047                | 0.067                              | 0.020                  | 0.048                                 | 0.017                  | 0.412          | 66                                                | 19                    | 65                                                | 3                     | 106                                                  | 818                   | 210                         | 130                        | a                 |
| 0.0417                             | 0.0017                 | 0.302                              | 0.015                  | 0.0525                                | 0.0017                 | 0.608          | 268                                               | 11                    | 263                                               | 10                    | 308                                                  | 72                    | 195                         | 120                        | a                 |
| 0.0402                             | 0.0015                 | 0.290                              | 0.015                  | 0.0523                                | 0.0020                 | 0.498          | 258                                               | 12                    | 254                                               | 9                     | 300                                                  | 86                    | 210                         | 135                        | a                 |
| 0.0614                             | 0.0024                 | 0.471                              | 0.023                  | 0.0555                                | 0.0017                 | 0.726          | 392                                               | 16                    | 384                                               | 14                    | 434                                                  | 67                    | 115                         | 95                         | a                 |
| 0.0273                             | 0.0013                 | 0.191                              | 0.022                  | 0.0506                                | 0.0061                 | 0.802          | 177                                               | 19                    | 174                                               | 8                     | 223                                                  | 280                   | 185                         | 85                         | a                 |
| 0.0404                             | 0.0020                 | 0.293                              | 0.014                  | 0.0525                                | 0.0023                 |                | 261                                               | 11                    | 255                                               | 13                    | 308                                                  | 100                   | 126                         | 90                         | a                 |
| 0.0644                             | 0.0029                 | 0.498                              | 0.039                  | 0.0562                                | 0.0038                 | 0.495          | 411                                               | 26                    | 402                                               | 17                    | 459                                                  | 151                   | 180                         | 100                        | a                 |
| 0.0976                             | 0.0040                 | 0.830                              | 0.049                  | 0.0617                                | 0.0027                 | 0.745          | 614                                               | 27                    | 600                                               | 23                    | 662                                                  | 92                    | 220                         | 105                        | a                 |
| 0.0386                             | 0.0015                 | 0.279                              | 0.013                  | 0.0524                                | 0.0015                 | 0.610          | 250                                               | 10                    | 244                                               | 9                     | 302                                                  | 63                    | 255                         | 95                         | a                 |
| 0.1757                             | 0.0088                 | 1.87                               | 0.11                   | 0.0770                                | 0.0030                 |                | 1069                                              | 41                    | 1044                                              | 48                    | 1120                                                 | 77                    | 133                         | 87                         | a                 |
| 0.1136                             | 0.0048                 | 1.013                              | 0.051                  | 0.0647                                | 0.0018                 | 0.857          | 710                                               | 26                    | 694                                               | 28                    | 764                                                  | 58                    | 250                         | 105                        | a                 |
| 0.0421                             | 0.0016                 | 0.308                              | 0.021                  | 0.0530                                | 0.0033                 | 0.887          | 273                                               | 16                    | 266                                               | 10                    | 329                                                  | 142                   | 250                         | 120                        | a                 |
| 0.1444                             | 0.0072                 | 1.407                              | 0.079                  | 0.0706                                | 0.0029                 |                | 892                                               | 33                    | 870                                               | 41                    | 947                                                  | 84                    | 163                         | 96                         | a                 |
| 0.0473                             | 0.0018                 | 0.351                              | 0.017                  | 0.0538                                | 0.0019                 | 0.597          | 306                                               | 13                    | 298                                               | 11                    | 364                                                  | 78                    | 210                         | 110                        | a                 |
| 0.1352                             | 0.0068                 | 1.284                              | 0.069                  | 0.0689                                | 0.0028                 |                | 839                                               | 30                    | 818                                               | 39                    | 895                                                  | 82                    | 190                         | 110                        | a                 |
| 0.0635                             | 0.0035                 | 0.495                              | 0.036                  | 0.0566                                | 0.0029                 | 0.675          | 408                                               | 25                    | 397                                               | 21                    | 474                                                  | 114                   | 175                         | 85                         | a                 |
| 0.0441                             | 0.0017                 | 0.326                              | 0.022                  | 0.0536                                | 0.0033                 | 0.894          | 287                                               | 17                    | 278                                               | 10                    | 356                                                  | 140                   | 205                         | 145                        | a                 |
| 0.1760                             | 0.0088                 | 1.89                               | 0.12                   | 0.0778                                | 0.0030                 |                | 1077                                              | 41                    | 1045                                              | 48                    | 1142                                                 | 76                    | 167                         | 120                        | a                 |
| 0.0450                             | 0.0018                 | 0.334                              | 0.016                  | 0.0539                                | 0.0017                 | 0.616          | 293                                               | 12                    | 284                                               | 11                    | 365                                                  | 72                    | 235                         | 145                        | a                 |
| 0.1712                             | 0.0086                 | 1.83                               | 0.11                   | 0.0775                                | 0.0030                 |                | 1056                                              | 39                    | 1019                                              | 47                    | 1133                                                 | 76                    | 252                         | 77                         | a                 |
| 0.0395                             | 0.0020                 | 0.290                              | 0.015                  | 0.0533                                | 0.0025                 |                | 259                                               | 12                    | 250                                               | 12                    | 342                                                  | 106                   | 152                         | 84                         | a                 |
| 0.1559                             | 0.0081                 | 1.60                               | 0.10                   | 0.0742                                | 0.0024                 | 0.885          | 969                                               | 40                    | 934                                               | 45                    | 1048                                                 | 66                    | 150                         | 120                        | a                 |
| 0.0473                             | 0.0019                 | 0.356                              | 0.022                  | 0.0546                                | 0.0030                 | 0.907          | 309                                               | 17                    | 298                                               | 12                    | 397                                                  | 122                   | 205                         | 125                        | a                 |
| 0.00505                            | 0.00025                | 0.0338                             | 0.0059                 | 0.0486                                | 0.0095                 |                | 34                                                | 6                     | 32                                                | 2                     | 127                                                  | 461                   | 130                         | 110                        | a                 |
| 0.0296                             | 0.0015                 | 0.213                              | 0.011                  | 0.0521                                | 0.0025                 |                | 196                                               | 9                     | 188                                               | 9                     | 288                                                  | 111                   | 265                         | 117                        | a                 |
| 0.0658                             | 0.0029                 | 0.524                              | 0.031                  | 0.0578                                | 0.0022                 | 0.711          | 428                                               | 20                    | 411                                               | 18                    | 521                                                  | 84                    | 175                         | 90                         | a                 |
| 0.1419                             | 0.0064                 | 1.406                              | 0.093                  | 0.0719                                | 0.0033                 | 0.808          | 891                                               | 39                    | 855                                               | 36                    | 982                                                  | 92                    | 180                         | 120                        | a                 |
| 0.00277                            | 0.00016                | 0.0185                             | 0.0044                 | 0.048                                 | 0.013                  |                | 19                                                | 4                     | 18                                                | 1                     | 117                                                  | 646                   | 255                         | 110                        | a                 |
| 0.02424                            | 0.00089                | 0.1720                             | 0.0090                 | 0.0515                                | 0.0022                 | 0.827          | 161                                               | 8                     | 154                                               | 6                     | 262                                                  | 98                    | 290                         | 120                        | a                 |
| 0.00922                            | 0.00058                | 0.063                              | 0.034                  | 0.049                                 | 0.029                  | 0.388          | 62                                                | 32                    | 59                                                | 4                     | 166                                                  | 1388                  | 285                         | 95                         | a                 |
| 0.0582                             | 0.0025                 | 0.456                              | 0.032                  | 0.0568                                | 0.0035                 | 0.924          | 381                                               | 23                    | 365                                               | 15                    | 483                                                  | 136                   | 235                         | 125                        | a                 |
| 0.1528                             | 0.0083                 | 1.57                               | 0.16                   | 0.0745                                | 0.0059                 | 0.736          | 958                                               | 65                    | 916                                               | 46                    | 1056                                                 | 160                   | 175                         | 95                         | a                 |
| 0.1531                             | 0.0070                 | 1.582                              | 0.096                  | 0.0749                                | 0.0027                 | 0.855          | 963                                               | 38                    | 918                                               | 39                    | 1066                                                 | 73                    | 210                         | 105                        | a                 |
| 0.0285                             | 0.0015                 | 0.206                              | 0.029                  | 0.0525                                | 0.0079                 | 0.810          | 190                                               | 25                    | 181                                               | 10                    | 308                                                  | 342                   | 205                         | 100                        | a                 |
| 0.1183                             | 0.0059                 | 1.114                              | 0.057                  | 0.0683                                | 0.0027                 |                | 760                                               | 27                    | 721                                               | 34                    | 878                                                  | 83                    | 156                         | 102                        | a                 |

| $^{206}\text{Pb}^*/^{238}\text{U}$ | $\pm 2\sigma$<br>(abs) | $^{207}\text{Pb}^*/^{235}\text{U}$ | $\pm 2\sigma$<br>(abs) | $^{207}\text{Pb}^*/^{206}\text{Pb}^*$ | $\pm 2\sigma$<br>(abs) | corr.<br>coef. | $^{206}\text{Pb}^*/^{238}\text{U}$<br>age<br>(Ma) | $\pm 2\sigma$<br>(Ma) | $^{207}\text{Pb}^*/^{235}\text{U}$<br>age<br>(Ma) | $\pm 2\sigma$<br>(Ma) | $^{207}\text{Pb}^*/^{206}\text{Pb}^*$<br>age<br>(Ma) | $\pm 2\sigma$<br>(Ma) | Length<br>( $\mu\text{m}$ ) | Width<br>( $\mu\text{m}$ ) | Accept/<br>Reject |
|------------------------------------|------------------------|------------------------------------|------------------------|---------------------------------------|------------------------|----------------|---------------------------------------------------|-----------------------|---------------------------------------------------|-----------------------|------------------------------------------------------|-----------------------|-----------------------------|----------------------------|-------------------|
| 0.1502                             | 0.0070                 | 1.553                              | 0.087                  | 0.0750                                | 0.0021                 | 0.888          | 952                                               | 35                    | 902                                               | 39                    | 1068                                                 | 55                    | 140                         | 105                        | a                 |
| 0.0352                             | 0.0013                 | 0.261                              | 0.015                  | 0.0537                                | 0.0027                 | 0.875          | 236                                               | 12                    | 223                                               | 8                     | 360                                                  | 112                   | 250                         | 125                        | a                 |
| 0.1517                             | 0.0076                 | 1.579                              | 0.090                  | 0.0755                                | 0.0030                 |                | 962                                               | 36                    | 911                                               | 43                    | 1081                                                 | 81                    | 208                         | 100                        | a                 |
| 0.1431                             | 0.0072                 | 1.461                              | 0.085                  | 0.0740                                | 0.0031                 |                | 914                                               | 35                    | 862                                               | 40                    | 1042                                                 | 86                    | 215                         | 96                         | a                 |
| 0.0426                             | 0.0016                 | 0.325                              | 0.020                  | 0.0553                                | 0.0029                 | 0.894          | 286                                               | 15                    | 269                                               | 10                    | 423                                                  | 118                   | 150                         | 140                        | a                 |
| 0.0332                             | 0.0014                 | 0.246                              | 0.034                  | 0.0539                                | 0.0080                 | 0.831          | 224                                               | 27                    | 210                                               | 9                     | 366                                                  | 336                   | 170                         | 85                         | a                 |
| 0.1442                             | 0.0064                 | 1.490                              | 0.079                  | 0.0749                                | 0.0020                 | 0.882          | 926                                               | 32                    | 868                                               | 36                    | 1066                                                 | 54                    | 195                         | 150                        | a                 |
| 0.0403                             | 0.0016                 | 0.307                              | 0.038                  | 0.0552                                | 0.0074                 | 0.863          | 272                                               | 30                    | 254                                               | 10                    | 421                                                  | 299                   | 190                         | 140                        | a                 |
| 0.0698                             | 0.0035                 | 0.580                              | 0.034                  | 0.0603                                | 0.0031                 |                | 465                                               | 22                    | 435                                               | 21                    | 613                                                  | 112                   | 224                         | 125                        | a                 |
| 0.0372                             | 0.0019                 | 0.281                              | 0.063                  | 0.055                                 | 0.012                  |                | 251                                               | 50                    | 235                                               | 12                    | 405                                                  | 483                   | 249                         | 210                        | a                 |
| 0.1525                             | 0.0076                 | 1.619                              | 0.090                  | 0.0770                                | 0.0030                 |                | 978                                               | 35                    | 915                                               | 43                    | 1122                                                 | 78                    | 114                         | 96                         | a                 |
| 0.1551                             | 0.0071                 | 1.661                              | 0.090                  | 0.0777                                | 0.0021                 | 0.890          | 994                                               | 34                    | 929                                               | 40                    | 1140                                                 | 53                    | 230                         | 125                        | a                 |
| 0.0418                             | 0.0016                 | 0.321                              | 0.020                  | 0.0557                                | 0.0030                 | 0.893          | 283                                               | 15                    | 264                                               | 10                    | 440                                                  | 118                   | 180                         | 105                        | a                 |
| 0.0397                             | 0.0015                 | 0.303                              | 0.016                  | 0.0554                                | 0.0023                 | 0.899          | 269                                               | 13                    | 251                                               | 9                     | 428                                                  | 93                    | 170                         | 145                        | a                 |
| 0.0348                             | 0.0014                 | 0.263                              | 0.023                  | 0.0548                                | 0.0048                 | 0.851          | 237                                               | 18                    | 220                                               | 9                     | 405                                                  | 195                   | 295                         | 80                         | a                 |
| 0.1550                             | 0.0072                 | 1.690                              | 0.092                  | 0.0791                                | 0.0021                 | 0.889          | 1005                                              | 35                    | 929                                               | 40                    | 1175                                                 | 52                    | 240                         | 100                        | a                 |
| 0.1394                             | 0.0071                 | 1.459                              | 0.084                  | 0.0759                                | 0.0020                 | 0.892          | 913                                               | 35                    | 841                                               | 40                    | 1092                                                 | 53                    | 195                         | 115                        | a                 |
| 0.1704                             | 0.0085                 | 1.98                               | 0.12                   | 0.0842                                | 0.0032                 |                | 1108                                              | 40                    | 1014                                              | 47                    | 1297                                                 | 75                    | 261                         | 78                         | a                 |
| 0.1510                             | 0.0075                 | 1.655                              | 0.090                  | 0.0795                                | 0.0031                 |                | 991                                               | 34                    | 906                                               | 42                    | 1184                                                 | 76                    | 177                         | 113                        | a                 |
| 0.00500                            | 0.00018                | 0.0352                             | 0.0031                 | 0.0511                                | 0.0048                 |                | 35                                                | 3                     | 32                                                | 1                     | 246                                                  | 218                   | 215                         | 110                        | a                 |
| 0.0892                             | 0.0042                 | 0.811                              | 0.068                  | 0.0659                                | 0.0045                 | 0.598          | 603                                               | 38                    | 551                                               | 25                    | 803                                                  | 143                   | 220                         | 100                        | a                 |
| 0.00392                            | 0.00020                | 0.0276                             | 0.0058                 | 0.051                                 | 0.011                  |                | 28                                                | 6                     | 25                                                | 1                     | 248                                                  | 491                   | 250                         | 70                         | a                 |
| 0.1597                             | 0.0080                 | 1.82                               | 0.13                   | 0.0825                                | 0.0038                 | 0.822          | 1051                                              | 47                    | 955                                               | 45                    | 1257                                                 | 91                    | 350                         | 80                         | a                 |
| 0.0594                             | 0.0023                 | 0.498                              | 0.029                  | 0.0607                                | 0.0028                 | 0.533          | 410                                               | 20                    | 372                                               | 14                    | 630                                                  | 100                   | 145                         | 120                        | a                 |
| 0.0454                             | 0.0019                 | 0.365                              | 0.022                  | 0.0583                                | 0.0029                 | 0.908          | 316                                               | 17                    | 286                                               | 11                    | 542                                                  | 110                   | 220                         | 115                        | a                 |
| 0.0428                             | 0.0020                 | 0.342                              | 0.032                  | 0.0579                                | 0.0054                 | 0.884          | 299                                               | 25                    | 270                                               | 12                    | 527                                                  | 203                   | 260                         | 90                         | a                 |
| 0.00809                            | 0.00040                | 0.059                              | 0.010                  | 0.0526                                | 0.0095                 |                | 58                                                | 10                    | 52                                                | 3                     | 312                                                  | 411                   | 278                         | 98                         | a                 |
| 0.0435                             | 0.0017                 | 0.356                              | 0.018                  | 0.0594                                | 0.0020                 | 0.547          | 309                                               | 13                    | 274                                               | 10                    | 581                                                  | 71                    | 185                         | 135                        | a                 |
| 0.0614                             | 0.0027                 | 0.534                              | 0.054                  | 0.0630                                | 0.0064                 | 0.917          | 434                                               | 36                    | 384                                               | 16                    | 708                                                  | 215                   | 280                         | 100                        | a                 |
| 0.1437                             | 0.0070                 | 1.69                               | 0.13                   | 0.0851                                | 0.0045                 | 0.759          | 1003                                              | 49                    | 865                                               | 39                    | 1318                                                 | 103                   | 260                         | 110                        | a                 |
| 0.1429                             | 0.0071                 | 1.691                              | 0.091                  | 0.0858                                | 0.0034                 |                | 1005                                              | 34                    | 861                                               | 40                    | 1334                                                 | 76                    | 171                         | 122                        | a                 |
| 0.0523                             | 0.0021                 | 0.460                              | 0.038                  | 0.0637                                | 0.0050                 | 0.906          | 384                                               | 26                    | 329                                               | 13                    | 732                                                  | 166                   | 235                         | 100                        | a                 |
| 0.0703                             | 0.0030                 | 0.674                              | 0.055                  | 0.0695                                | 0.0050                 | 0.936          | 523                                               | 33                    | 438                                               | 18                    | 912                                                  | 147                   | 230                         | 90                         | a                 |
| 0.1260                             | 0.0070                 | 1.47                               | 0.21                   | 0.085                                 | 0.011                  | 0.964          | 918                                               | 88                    | 765                                               | 40                    | 1305                                                 | 249                   | 205                         | 115                        | a                 |
| 0.0345                             | 0.0016                 | 0.299                              | 0.017                  | 0.0629                                | 0.0020                 | 0.531          | 266                                               | 13                    | 219                                               | 10                    | 706                                                  | 67                    | 150                         | 110                        | a                 |
| 0.0433                             | 0.0033                 | 0.406                              | 0.049                  | 0.0680                                | 0.0067                 | 0.903          | 346                                               | 35                    | 273                                               | 20                    | 869                                                  | 205                   | 165                         | 95                         | a                 |
| 0.167                              | 0.015                  | 2.48                               | 0.25                   | 0.1075                                | 0.0032                 | 0.921          | 1265                                              | 72                    | 997                                               | 83                    | 1757                                                 | 54                    | 210                         | 150                        | a                 |
| 0.0444                             | 0.0018                 | 0.428                              | 0.042                  | 0.0699                                | 0.0069                 | 0.884          | 362                                               | 30                    | 280                                               | 11                    | 925                                                  | 203                   | 230                         | 90                         | a                 |
| 0.01375                            | 0.00079                | 0.119                              | 0.017                  | 0.0627                                | 0.0097                 | 0.597          | 114                                               | 15                    | 88                                                | 5                     | 699                                                  | 330                   | 270                         | 105                        | a                 |
| 0.0054                             | 0.0015                 | 0.045                              | 0.016                  | 0.061                                 | 0.014                  | 0.378          | 45                                                | 16                    | 35                                                | 10                    | 638                                                  | 510                   | 185                         | 75                         | a                 |
| 0.0704                             | 0.0036                 | 0.804                              | 0.097                  | 0.0829                                | 0.0096                 | 0.930          | 599                                               | 55                    | 438                                               | 22                    | 1267                                                 | 227                   | 55                          | 40                         | r                 |
| 0.0539                             | 0.0021                 | 0.579                              | 0.032                  | 0.0778                                | 0.0028                 | 0.514          | 464                                               | 20                    | 339                                               | 13                    | 1143                                                 | 71                    | 175                         | 100                        | r                 |
| 0.0408                             | 0.0019                 | 0.417                              | 0.042                  | 0.0741                                | 0.0073                 | 0.877          | 354                                               | 30                    | 258                                               | 12                    | 1045                                                 | 198                   | 290                         | 115                        | r                 |
| 0.00319                            | 0.00015                | 0.0283                             | 0.0081                 | 0.064                                 | 0.021                  |                | 28                                                | 8                     | 21                                                | 1                     | 750                                                  | 703                   | 215                         | 90                         | r                 |
| 0.0534                             | 0.0027                 | 0.60                               | 0.28                   | 0.081                                 | 0.034                  |                | 475                                               | 181                   | 335                                               | 16                    | 1221                                                 | 815                   | 247                         | 103                        | r                 |
| 0.1248                             | 0.0062                 | 1.89                               | 0.15                   | 0.1097                                | 0.0067                 |                | 1077                                              | 54                    | 758                                               | 36                    | 1794                                                 | 110                   | 141                         | 133                        | r                 |
| 0.0436                             | 0.0021                 | 0.471                              | 0.058                  | 0.0782                                | 0.0098                 | 0.880          | 392                                               | 40                    | 275                                               | 13                    | 1152                                                 | 249                   | 205                         | 110                        | r                 |
| 0.0344                             | 0.0013                 | 0.366                              | 0.043                  | 0.0771                                | 0.0097                 | 0.842          | 316                                               | 32                    | 218                                               | 8                     | 1125                                                 | 252                   | 205                         | 100                        | r                 |
| 0.0451                             | 0.0017                 | 0.502                              | 0.049                  | 0.0807                                | 0.0079                 | 0.886          | 413                                               | 33                    | 284                                               | 11                    | 1215                                                 | 193                   | 170                         | 120                        | r                 |
| 0.0295                             | 0.0015                 | 0.325                              | 0.065                  | 0.080                                 | 0.015                  |                | 286                                               | 50                    | 187                                               | 9                     | 1196                                                 | 363                   | 185                         | 86                         | r                 |
| 0.1169                             | 0.0071                 | 1.95                               | 0.16                   | 0.1207                                | 0.0063                 | 0.675          | 1097                                              | 56                    | 713                                               | 41                    | 1967                                                 | 93                    | 250                         | 90                         | r                 |

| $^{206}\text{Pb}^*/^{238}\text{U}$                     | $\pm 2\sigma$<br>(abs) | $^{207}\text{Pb}^*/^{235}\text{U}$ | $\pm 2\sigma$<br>(abs) | $^{207}\text{Pb}^*/^{206}\text{Pb}^*$ | $\pm 2\sigma$<br>(abs) | corr.<br>coef. | $^{206}\text{Pb}^*/^{238}\text{U}$<br>age<br>(Ma) | $\pm 2\sigma$<br>(Ma) | $^{207}\text{Pb}^*/^{235}\text{U}$<br>age<br>(Ma) | $\pm 2\sigma$<br>(Ma) | $^{207}\text{Pb}^*/^{206}\text{Pb}^*$<br>age<br>(Ma) | $\pm 2\sigma$<br>(Ma) | Length<br>( $\mu\text{m}$ ) | Width<br>( $\mu\text{m}$ ) | Accept/<br>Reject |
|--------------------------------------------------------|------------------------|------------------------------------|------------------------|---------------------------------------|------------------------|----------------|---------------------------------------------------|-----------------------|---------------------------------------------------|-----------------------|------------------------------------------------------|-----------------------|-----------------------------|----------------------------|-------------------|
| 0.0301                                                 | 0.0011                 | 0.354                              | 0.023                  | 0.0853                                | 0.0046                 | 0.855          | 307                                               | 17                    | 191                                               | 7                     | 1323                                                 | 105                   | 265                         | 135                        | r                 |
| 0.0657                                                 | 0.0033                 | 0.953                              | 0.079                  | 0.1052                                | 0.0076                 |                | 680                                               | 41                    | 410                                               | 20                    | 1719                                                 | 133                   | 168                         | 78                         | r                 |
| 0.0435                                                 | 0.0018                 | 0.617                              | 0.056                  | 0.1029                                | 0.0090                 | 0.888          | 488                                               | 35                    | 274                                               | 11                    | 1677                                                 | 161                   | 210                         | 95                         | r                 |
| 0.1095                                                 | 0.0072                 | 2.35                               | 0.21                   | 0.1556                                | 0.0080                 | 0.597          | 1227                                              | 65                    | 670                                               | 42                    | 2408                                                 | 87                    | 155                         | 125                        | r                 |
| 0.0687                                                 | 0.0055                 | 1.17                               | 0.27                   | 0.124                                 | 0.028                  | 0.928          | 788                                               | 127                   | 428                                               | 33                    | 2011                                                 | 403                   | 180                         | 90                         | r                 |
| 0.0929                                                 | 0.0048                 | 1.99                               | 0.13                   | 0.1557                                | 0.0047                 | 0.644          | 1113                                              | 43                    | 573                                               | 28                    | 2409                                                 | 51                    | 235                         | 110                        | r                 |
| 0.0575                                                 | 0.0049                 | 1.03                               | 0.28                   | 0.130                                 | 0.036                  | 0.912          | 719                                               | 142                   | 361                                               | 30                    | 2098                                                 | 482                   | 105                         | 80                         | r                 |
| 0.0531                                                 | 0.0025                 | 0.964                              | 0.098                  | 0.132                                 | 0.013                  | 0.909          | 685                                               | 51                    | 333                                               | 15                    | 2120                                                 | 169                   | 160                         | 130                        | r                 |
| 0.0445                                                 | 0.0025                 | 0.89                               | 0.15                   | 0.145                                 | 0.026                  | 0.883          | 647                                               | 82                    | 281                                               | 15                    | 2289                                                 | 303                   | 195                         | 75                         | r                 |
| 0.0682                                                 | 0.0060                 | 1.85                               | 0.34                   | 0.197                                 | 0.032                  | 0.935          | 1063                                              | 121                   | 425                                               | 36                    | 2797                                                 | 263                   | 225                         | 110                        | r                 |
| 0.087                                                  | 0.010                  | 4.58                               | 0.66                   | 0.381                                 | 0.020                  | 0.978          | 1745                                              | 120                   | 539                                               | 60                    | 3836                                                 | 80                    | 195                         | 100                        | r                 |
| 0.000266                                               | 0.000013               | 0.0058                             | 0.0098                 | 0.16                                  | 0.34                   |                | 6                                                 | 10                    | 2                                                 | 0                     | 2443                                                 | 3587                  | 280                         | 113                        | a                 |
| 0.00361                                                | 0.00028                | 0.085                              | 0.018                  | 0.172                                 | 0.038                  |                | 83                                                | 17                    | 23                                                | 2                     | 2575                                                 | 371                   | 175                         | 85                         | r                 |
| <b>8. Solimões River, Brazil (3.6424°S, 61.4510°W)</b> |                        |                                    |                        |                                       |                        |                |                                                   |                       |                                                   |                       |                                                      |                       |                             |                            |                   |
| 0.00618                                                | 0.00029                | 0.011                              | 0.015                  | 0.013                                 | 0.037                  | *              | 11                                                | 15                    | 40                                                | 2                     |                                                      |                       | 300                         | 125                        | r                 |
| 0.00703                                                | 0.00054                | 0.020                              | 0.022                  | 0.020                                 | 0.025                  | 0.132          | 20                                                | 22                    | 45                                                | 3                     |                                                      |                       | 130                         | 105                        | a                 |
| 0.177                                                  | 0.011                  | 2.88                               | 0.20                   | 0.1180                                | 0.0032                 | 0.893          | 1376                                              | 53                    | 1050                                              | 60                    | 1926                                                 | 49                    | 180                         | 80                         | r                 |
| 0.00670                                                | 0.00034                | 0.032                              | 0.010                  | 0.034                                 | 0.013                  | 0.104          | 32                                                | 10                    | 43                                                | 2                     |                                                      |                       | 155                         | 110                        | a                 |
| 0.269                                                  | 0.018                  | 6.71                               | 0.46                   | 0.1808                                | 0.0048                 | 0.889          | 2074                                              | 60                    | 1537                                              | 89                    | 2660                                                 | 44                    | 255                         | 90                         | r                 |
| 0.171                                                  | 0.011                  | 2.46                               | 0.18                   | 0.1041                                | 0.0032                 | 0.891          | 1260                                              | 53                    | 1020                                              | 60                    | 1699                                                 | 56                    | 230                         | 130                        | a                 |
| 0.0204                                                 | 0.0010                 | 0.115                              | 0.014                  | 0.0408                                | 0.0034                 |                | 110                                               | 13                    | 130                                               | 6                     |                                                      |                       | 289                         | 112                        | a                 |
| 0.01647                                                | 0.00082                | 0.0925                             | 0.0071                 | 0.0407                                | 0.0018                 |                | 90                                                | 7                     | 105                                               | 5                     |                                                      |                       | 163                         | 131                        | a                 |
| 0.1810                                                 | 0.0099                 | 2.38                               | 0.14                   | 0.0954                                | 0.0027                 | 0.888          | 1237                                              | 41                    | 1072                                              | 54                    | 1536                                                 | 52                    | 200                         | 150                        | a                 |
| 0.229                                                  | 0.013                  | 3.67                               | 0.24                   | 0.1160                                | 0.0031                 | 0.912          | 1564                                              | 53                    | 1331                                              | 68                    | 1895                                                 | 48                    | 165                         | 140                        | a                 |
| 0.00517                                                | 0.00020                | 0.0289                             | 0.0039                 | 0.0406                                | 0.0063                 | *              | 29                                                | 4                     | 33                                                | 1                     |                                                      |                       | 145                         | 125                        | a                 |
| 0.00393                                                | 0.00020                | 0.0221                             | 0.0047                 | 0.0409                                | 0.0063                 |                | 22                                                | 5                     | 25                                                | 1                     |                                                      |                       | 166                         | 127                        | a                 |
| 0.258                                                  | 0.014                  | 4.60                               | 0.30                   | 0.1291                                | 0.0034                 | 0.914          | 1749                                              | 55                    | 1481                                              | 74                    | 2086                                                 | 46                    | 180                         | 125                        | a                 |
| 0.0302                                                 | 0.0012                 | 0.181                              | 0.018                  | 0.0436                                | 0.0047                 | 0.817          | 169                                               | 16                    | 192                                               | 7                     |                                                      |                       | 205                         | 145                        | a                 |
| 0.1933                                                 | 0.0097                 | 1.71                               | 0.26                   | 0.0643                                | 0.0052                 |                | 1014                                              | 96                    | 1139                                              | 52                    | 752                                                  | 171                   | 251                         | 81                         | a                 |
| 0.257                                                  | 0.014                  | 4.44                               | 0.29                   | 0.1251                                | 0.0033                 | 0.917          | 1719                                              | 55                    | 1476                                              | 74                    | 2030                                                 | 46                    | 175                         | 90                         | a                 |
| 0.01102                                                | 0.00046                | 0.0652                             | 0.0063                 | 0.0429                                | 0.0077                 | *              | 64                                                | 6                     | 71                                                | 3                     |                                                      |                       | 340                         | 140                        | a                 |
| 0.1712                                                 | 0.0087                 | 1.99                               | 0.11                   | 0.0842                                | 0.0022                 | 0.893          | 1111                                              | 36                    | 1019                                              | 48                    | 1297                                                 | 51                    | 175                         | 100                        | a                 |
| 0.242                                                  | 0.015                  | 3.65                               | 0.26                   | 0.1097                                | 0.0031                 | 0.923          | 1561                                              | 57                    | 1395                                              | 76                    | 1794                                                 | 51                    | 70                          | 85                         | a                 |
| 0.187                                                  | 0.016                  | 2.27                               | 0.30                   | 0.0879                                | 0.0067                 | 0.842          | 1202                                              | 92                    | 1105                                              | 86                    | 1381                                                 | 147                   | 70                          | 65                         | a                 |
| 0.1755                                                 | 0.0088                 | 2.02                               | 0.13                   | 0.0833                                | 0.0029                 | 0.875          | 1121                                              | 45                    | 1043                                              | 48                    | 1276                                                 | 69                    | 250                         | 105                        | a                 |
| 0.00356                                                | 0.00013                | 0.0213                             | 0.0029                 | 0.0434                                | 0.0068                 | *              | 21                                                | 3                     | 23                                                | 1                     |                                                      |                       | 205                         | 95                         | a                 |
| 0.1724                                                 | 0.0084                 | 1.94                               | 0.11                   | 0.0818                                | 0.0022                 | 0.901          | 1096                                              | 39                    | 1025                                              | 46                    | 1240                                                 | 52                    | 180                         | 100                        | a                 |
| 0.1727                                                 | 0.0084                 | 1.94                               | 0.11                   | 0.0816                                | 0.0022                 | 0.903          | 1096                                              | 39                    | 1027                                              | 46                    | 1237                                                 | 52                    | 200                         | 110                        | a                 |
| 0.1730                                                 | 0.0088                 | 1.94                               | 0.10                   | 0.0813                                | 0.0022                 | 0.895          | 1095                                              | 36                    | 1029                                              | 48                    | 1228                                                 | 53                    | 250                         | 80                         | a                 |
| 0.1799                                                 | 0.0092                 | 2.03                               | 0.13                   | 0.0819                                | 0.0024                 | 0.902          | 1126                                              | 42                    | 1066                                              | 50                    | 1242                                                 | 58                    | 145                         | 90                         | a                 |
| 0.1813                                                 | 0.0092                 | 2.06                               | 0.14                   | 0.0823                                | 0.0032                 | 0.868          | 1134                                              | 48                    | 1074                                              | 50                    | 1252                                                 | 77                    | 130                         | 115                        | a                 |
| 0.1079                                                 | 0.0047                 | 0.858                              | 0.070                  | 0.0577                                | 0.0040                 | 0.682          | 629                                               | 38                    | 661                                               | 27                    | 517                                                  | 151                   | 195                         | 145                        | a                 |
| 0.0323                                                 | 0.0013                 | 0.212                              | 0.017                  | 0.0476                                | 0.0037                 | 0.844          | 195                                               | 14                    | 205                                               | 8                     | 82                                                   | 184                   | 185                         | 120                        | a                 |
| 0.1713                                                 | 0.0088                 | 1.87                               | 0.10                   | 0.0792                                | 0.0026                 | 0.873          | 1070                                              | 37                    | 1019                                              | 48                    | 1176                                                 | 66                    | 190                         | 95                         | a                 |
| 0.1117                                                 | 0.0056                 | 0.902                              | 0.060                  | 0.0586                                | 0.0019                 |                | 653                                               | 32                    | 683                                               | 32                    | 551                                                  | 72                    | 148                         | 86                         | a                 |
| 0.0311                                                 | 0.0012                 | 0.207                              | 0.012                  | 0.0482                                | 0.0026                 | 0.853          | 191                                               | 10                    | 197                                               | 7                     | 110                                                  | 125                   | 180                         | 145                        | a                 |
| 0.1098                                                 | 0.0055                 | 0.900                              | 0.054                  | 0.0595                                | 0.0016                 |                | 652                                               | 29                    | 671                                               | 32                    | 585                                                  | 58                    | 123                         | 81                         | a                 |
| 0.0315                                                 | 0.0012                 | 0.211                              | 0.014                  | 0.0486                                | 0.0031                 | 0.843          | 194                                               | 12                    | 200                                               | 7                     | 128                                                  | 150                   | 155                         | 105                        | a                 |
| 0.1768                                                 | 0.0092                 | 1.89                               | 0.11                   | 0.0776                                | 0.0021                 | 0.915          | 1078                                              | 40                    | 1049                                              | 50                    | 1138                                                 | 53                    | 155                         | 75                         | a                 |
| 0.0950                                                 | 0.0047                 | 0.755                              | 0.047                  | 0.0577                                | 0.0017                 |                | 571                                               | 27                    | 585                                               | 28                    | 518                                                  | 65                    | 199                         | 121                        | a                 |
| 0.0312                                                 | 0.0016                 | 0.210                              | 0.014                  | 0.0488                                | 0.0017                 |                | 194                                               | 12                    | 198                                               | 10                    | 139                                                  | 84                    | 171                         | 83                         | a                 |

| $^{206}\text{Pb}^*/^{238}\text{U}$ | $\pm 2\sigma$<br>(abs) | $^{207}\text{Pb}^*/^{235}\text{U}$ | $\pm 2\sigma$<br>(abs) | $^{207}\text{Pb}^*/^{206}\text{Pb}^*$ | $\pm 2\sigma$<br>(abs) | corr.<br>coef. | $^{206}\text{Pb}^*/^{238}\text{U}$<br>age<br>(Ma) | $\pm 2\sigma$<br>(Ma) | $^{207}\text{Pb}^*/^{235}\text{U}$<br>age<br>(Ma) | $\pm 2\sigma$<br>(Ma) | $^{207}\text{Pb}^*/^{206}\text{Pb}^*$<br>age<br>(Ma) | $\pm 2\sigma$<br>(Ma) | Length<br>( $\mu\text{m}$ ) | Width<br>( $\mu\text{m}$ ) | Accept/<br>Reject |
|------------------------------------|------------------------|------------------------------------|------------------------|---------------------------------------|------------------------|----------------|---------------------------------------------------|-----------------------|---------------------------------------------------|-----------------------|------------------------------------------------------|-----------------------|-----------------------------|----------------------------|-------------------|
| 0.218                              | 0.011                  | 2.41                               | 0.17                   | 0.0799                                | 0.0022                 |                | 1245                                              | 51                    | 1273                                              | 58                    | 1196                                                 | 54                    | 171                         | 88                         | a                 |
| 0.0201                             | 0.0010                 | 0.132                              | 0.013                  | 0.0476                                | 0.0030                 |                | 126                                               | 12                    | 128                                               | 6                     | 81                                                   | 152                   | 158                         | 120                        | a                 |
| 0.0292                             | 0.0011                 | 0.197                              | 0.012                  | 0.0489                                | 0.0026                 | 0.842          | 182                                               | 10                    | 185                                               | 7                     | 143                                                  | 126                   | 145                         | 105                        | a                 |
| 0.0373                             | 0.0019                 | 0.257                              | 0.015                  | 0.0500                                | 0.0014                 |                | 233                                               | 12                    | 236                                               | 12                    | 197                                                  | 63                    | 174                         | 138                        | a                 |
| 0.0381                             | 0.0019                 | 0.265                              | 0.031                  | 0.0504                                | 0.0039                 |                | 239                                               | 25                    | 241                                               | 12                    | 216                                                  | 181                   | 233                         | 117                        | a                 |
| 0.0968                             | 0.0049                 | 0.79                               | 0.15                   | 0.059                                 | 0.011                  | 0.947          | 592                                               | 87                    | 596                                               | 29                    | 579                                                  | 421                   | 130                         | 85                         | a                 |
| 0.0244                             | 0.0012                 | 0.165                              | 0.013                  | 0.0489                                | 0.0025                 |                | 155                                               | 11                    | 155                                               | 8                     | 143                                                  | 118                   | 323                         | 163                        | a                 |
| 0.216                              | 0.011                  | 2.45                               | 0.17                   | 0.0821                                | 0.0021                 |                | 1256                                              | 50                    | 1261                                              | 58                    | 1248                                                 | 51                    | 256                         | 77                         | a                 |
| 0.1642                             | 0.0081                 | 1.62                               | 0.12                   | 0.0715                                | 0.0033                 | 0.847          | 977                                               | 46                    | 980                                               | 45                    | 971                                                  | 94                    | 220                         | 95                         | a                 |
| 0.0318                             | 0.0016                 | 0.220                              | 0.015                  | 0.0500                                | 0.0019                 |                | 202                                               | 12                    | 202                                               | 10                    | 195                                                  | 91                    | 205                         | 124                        | a                 |
| 0.0336                             | 0.0014                 | 0.233                              | 0.014                  | 0.0503                                | 0.0041                 | 0.760          | 213                                               | 11                    | 213                                               | 9                     | 210                                                  | 190                   | 165                         | 105                        | a                 |
| 0.1791                             | 0.0090                 | 1.85                               | 0.13                   | 0.0748                                | 0.0023                 |                | 1062                                              | 47                    | 1062                                              | 49                    | 1062                                                 | 61                    | 147                         | 97                         | a                 |
| 0.0836                             | 0.0042                 | 0.665                              | 0.040                  | 0.0577                                | 0.0016                 |                | 518                                               | 24                    | 518                                               | 25                    | 518                                                  | 63                    | 196                         | 147                        | a                 |
| 0.1822                             | 0.0091                 | 1.90                               | 0.13                   | 0.0757                                | 0.0020                 |                | 1082                                              | 45                    | 1079                                              | 50                    | 1087                                                 | 54                    | 197                         | 108                        | a                 |
| 0.0744                             | 0.0037                 | 0.579                              | 0.034                  | 0.0565                                | 0.0015                 |                | 464                                               | 22                    | 463                                               | 22                    | 471                                                  | 60                    | 268                         | 93                         | a                 |
| 0.0833                             | 0.0034                 | 0.666                              | 0.032                  | 0.0580                                | 0.0016                 | 0.811          | 518                                               | 20                    | 516                                               | 20                    | 529                                                  | 62                    | 170                         | 100                        | a                 |
| 0.0690                             | 0.0034                 | 0.531                              | 0.033                  | 0.0558                                | 0.0017                 |                | 432                                               | 22                    | 430                                               | 21                    | 444                                                  | 68                    | 140                         | 136                        | a                 |
| 0.0555                             | 0.0024                 | 0.412                              | 0.020                  | 0.0538                                | 0.0022                 | 0.508          | 350                                               | 14                    | 348                                               | 14                    | 364                                                  | 93                    | 140                         | 100                        | a                 |
| 0.0538                             | 0.0023                 | 0.398                              | 0.027                  | 0.0536                                | 0.0030                 | 0.495          | 340                                               | 19                    | 338                                               | 14                    | 356                                                  | 126                   | 200                         | 125                        | a                 |
| 0.1740                             | 0.0087                 | 1.79                               | 0.12                   | 0.0746                                | 0.0020                 |                | 1041                                              | 43                    | 1034                                              | 48                    | 1057                                                 | 53                    | 188                         | 107                        | a                 |
| 0.0407                             | 0.0020                 | 0.291                              | 0.018                  | 0.0518                                | 0.0016                 |                | 259                                               | 14                    | 257                                               | 13                    | 276                                                  | 72                    | 213                         | 94                         | a                 |
| 0.0435                             | 0.0022                 | 0.313                              | 0.018                  | 0.0522                                | 0.0015                 |                | 277                                               | 14                    | 275                                               | 13                    | 293                                                  | 65                    | 183                         | 137                        | a                 |
| 0.0439                             | 0.0022                 | 0.317                              | 0.018                  | 0.0524                                | 0.0015                 |                | 280                                               | 14                    | 277                                               | 14                    | 301                                                  | 65                    | 266                         | 89                         | a                 |
| 0.252                              | 0.013                  | 3.22                               | 0.25                   | 0.0927                                | 0.0026                 |                | 1462                                              | 60                    | 1448                                              | 65                    | 1482                                                 | 54                    | 181                         | 112                        | a                 |
| 0.0400                             | 0.0017                 | 0.286                              | 0.013                  | 0.0518                                | 0.0017                 | 0.449          | 255                                               | 10                    | 253                                               | 10                    | 277                                                  | 76                    | 235                         | 140                        | a                 |
| 0.1093                             | 0.0055                 | 0.946                              | 0.064                  | 0.0628                                | 0.0021                 |                | 676                                               | 34                    | 669                                               | 32                    | 701                                                  | 70                    | 139                         | 102                        | a                 |
| 0.0427                             | 0.0021                 | 0.308                              | 0.018                  | 0.0523                                | 0.0015                 |                | 273                                               | 14                    | 270                                               | 13                    | 298                                                  | 67                    | 181                         | 87                         | a                 |
| 0.0429                             | 0.0017                 | 0.310                              | 0.018                  | 0.0524                                | 0.0026                 | 0.899          | 274                                               | 14                    | 271                                               | 11                    | 304                                                  | 114                   | 245                         | 105                        | a                 |
| 0.0453                             | 0.0017                 | 0.330                              | 0.016                  | 0.0528                                | 0.0017                 | 0.607          | 290                                               | 12                    | 286                                               | 10                    | 322                                                  | 73                    | 150                         | 115                        | a                 |
| 0.01234                            | 0.00050                | 0.0821                             | 0.0038                 | 0.0483                                | 0.0022                 | 0.530          | 80                                                | 4                     | 79                                                | 3                     | 114                                                  | 107                   | 185                         | 100                        | a                 |
| 0.00803                            | 0.00037                | 0.0529                             | 0.0096                 | 0.048                                 | 0.017                  | *              | 52                                                | 9                     | 52                                                | 2                     | 87                                                   | 861                   | 200                         | 115                        | a                 |
| 0.0525                             | 0.0020                 | 0.391                              | 0.021                  | 0.0540                                | 0.0021                 | 0.592          | 335                                               | 15                    | 330                                               | 12                    | 370                                                  | 89                    | 205                         | 105                        | a                 |
| 0.1051                             | 0.0053                 | 0.906                              | 0.068                  | 0.0625                                | 0.0025                 |                | 655                                               | 36                    | 644                                               | 31                    | 691                                                  | 86                    | 137                         | 107                        | a                 |
| 0.0221                             | 0.0011                 | 0.1520                             | 0.0083                 | 0.0499                                | 0.0013                 |                | 144                                               | 7                     | 141                                               | 7                     | 192                                                  | 62                    | 217                         | 127                        | a                 |
| 0.0792                             | 0.0034                 | 0.639                              | 0.030                  | 0.0585                                | 0.0020                 | 0.728          | 502                                               | 19                    | 491                                               | 21                    | 548                                                  | 76                    | 185                         | 125                        | a                 |
| 0.0267                             | 0.0011                 | 0.1867                             | 0.0089                 | 0.0507                                | 0.0024                 | 0.790          | 174                                               | 8                     | 170                                               | 7                     | 225                                                  | 107                   | 250                         | 85                         | a                 |
| 0.00363                            | 0.00015                | 0.0238                             | 0.0016                 | 0.0476                                | 0.0050                 | *              | 24                                                | 2                     | 23                                                | 1                     | 77                                                   | 252                   | 295                         | 85                         | a                 |
| 0.0456                             | 0.0019                 | 0.336                              | 0.015                  | 0.0534                                | 0.0014                 | 0.642          | 294                                               | 11                    | 287                                               | 12                    | 346                                                  | 60                    | 115                         | 135                        | a                 |
| 0.0210                             | 0.0011                 | 0.145                              | 0.015                  | 0.0499                                | 0.0034                 |                | 137                                               | 13                    | 134                                               | 7                     | 193                                                  | 157                   | 229                         | 80                         | a                 |
| 0.02399                            | 0.00098                | 0.1669                             | 0.0080                 | 0.0505                                | 0.0025                 | 0.753          | 157                                               | 7                     | 153                                               | 6                     | 217                                                  | 113                   | 180                         | 105                        | a                 |
| 0.0446                             | 0.0022                 | 0.330                              | 0.019                  | 0.0537                                | 0.0016                 |                | 289                                               | 15                    | 281                                               | 14                    | 357                                                  | 67                    | 153                         | 103                        | a                 |
| 0.0471                             | 0.0019                 | 0.352                              | 0.018                  | 0.0542                                | 0.0020                 | 0.581          | 306                                               | 14                    | 297                                               | 12                    | 381                                                  | 84                    | 155                         | 90                         | a                 |
| 0.0873                             | 0.0035                 | 0.732                              | 0.038                  | 0.0607                                | 0.0021                 | 0.762          | 557                                               | 22                    | 540                                               | 21                    | 630                                                  | 76                    | 140                         | 110                        | a                 |
| 0.0439                             | 0.0018                 | 0.327                              | 0.015                  | 0.0539                                | 0.0019                 | 0.897          | 287                                               | 11                    | 277                                               | 11                    | 368                                                  | 81                    | 280                         | 70                         | a                 |
| 0.0828                             | 0.0036                 | 0.688                              | 0.032                  | 0.0603                                | 0.0016                 | 0.806          | 532                                               | 19                    | 513                                               | 22                    | 614                                                  | 57                    | 160                         | 125                        | a                 |
| 0.0862                             | 0.0038                 | 0.724                              | 0.034                  | 0.0609                                | 0.0017                 | 0.805          | 553                                               | 20                    | 533                                               | 22                    | 636                                                  | 59                    | 140                         | 100                        | a                 |
| 0.1615                             | 0.0082                 | 1.685                              | 0.100                  | 0.0756                                | 0.0021                 | 0.904          | 1003                                              | 38                    | 965                                               | 46                    | 1086                                                 | 55                    | 225                         | 95                         | a                 |
| 0.0686                             | 0.0034                 | 0.550                              | 0.034                  | 0.0581                                | 0.0019                 |                | 445                                               | 22                    | 428                                               | 21                    | 534                                                  | 70                    | 196                         | 96                         | a                 |
| 0.0315                             | 0.0012                 | 0.228                              | 0.020                  | 0.0525                                | 0.0049                 | 0.829          | 208                                               | 17                    | 200                                               | 7                     | 307                                                  | 213                   | 190                         | 115                        | a                 |
| 0.0560                             | 0.0024                 | 0.436                              | 0.021                  | 0.0565                                | 0.0022                 | 0.540          | 368                                               | 15                    | 351                                               | 15                    | 471                                                  | 85                    | 125                         | 90                         | a                 |
| 0.0526                             | 0.0026                 | 0.406                              | 0.038                  | 0.0560                                | 0.0033                 |                | 346                                               | 28                    | 330                                               | 16                    | 454                                                  | 129                   | 179                         | 94                         | a                 |

| $^{206}\text{Pb}^*/^{238}\text{U}$ | $\pm 2\sigma$<br>(abs) | $^{207}\text{Pb}^*/^{235}\text{U}$ | $\pm 2\sigma$<br>(abs) | $^{207}\text{Pb}^*/^{206}\text{Pb}^*$ | $\pm 2\sigma$<br>(abs) | corr.<br>coef. | $^{206}\text{Pb}^*/^{238}\text{U}$<br>age<br>(Ma) | $\pm 2\sigma$<br>(Ma) | $^{207}\text{Pb}^*/^{235}\text{U}$<br>age<br>(Ma) | $\pm 2\sigma$<br>(Ma) | $^{207}\text{Pb}^*/^{206}\text{Pb}^*$<br>age<br>(Ma) | $\pm 2\sigma$<br>(Ma) | Length<br>( $\mu\text{m}$ ) | Width<br>( $\mu\text{m}$ ) | Accept/<br>Reject |
|------------------------------------|------------------------|------------------------------------|------------------------|---------------------------------------|------------------------|----------------|---------------------------------------------------|-----------------------|---------------------------------------------------|-----------------------|------------------------------------------------------|-----------------------|-----------------------------|----------------------------|-------------------|
| 0.1475                             | 0.0068                 | 1.498                              | 0.086                  | 0.0737                                | 0.0023                 | 0.871          | 930                                               | 35                    | 887                                               | 38                    | 1033                                                 | 63                    | 210                         | 140                        | a                 |
| 0.1505                             | 0.0075                 | 1.54                               | 0.10                   | 0.0744                                | 0.0020                 |                | 948                                               | 40                    | 904                                               | 42                    | 1052                                                 | 54                    | 118                         | 110                        | a                 |
| 0.0452                             | 0.0017                 | 0.343                              | 0.016                  | 0.0550                                | 0.0015                 | 0.658          | 299                                               | 12                    | 285                                               | 11                    | 411                                                  | 62                    | 205                         | 95                         | a                 |
| 0.1600                             | 0.0076                 | 1.689                              | 0.095                  | 0.0766                                | 0.0021                 | 0.897          | 1004                                              | 36                    | 957                                               | 42                    | 1110                                                 | 54                    | 175                         | 100                        | a                 |
| 0.0384                             | 0.0016                 | 0.287                              | 0.014                  | 0.0541                                | 0.0025                 | 0.852          | 256                                               | 11                    | 243                                               | 10                    | 376                                                  | 105                   | 115                         | 100                        | a                 |
| 0.1526                             | 0.0071                 | 1.587                              | 0.089                  | 0.0754                                | 0.0021                 | 0.885          | 965                                               | 35                    | 916                                               | 40                    | 1080                                                 | 57                    | 260                         | 80                         | a                 |
| 0.1565                             | 0.0078                 | 1.65                               | 0.11                   | 0.0764                                | 0.0022                 |                | 989                                               | 43                    | 938                                               | 44                    | 1104                                                 | 57                    | 211                         | 113                        | a                 |
| 0.1620                             | 0.0081                 | 1.735                              | 0.092                  | 0.0777                                | 0.0022                 | 0.884          | 1022                                              | 34                    | 968                                               | 45                    | 1138                                                 | 57                    | 210                         | 80                         | a                 |
| 0.1026                             | 0.0047                 | 0.925                              | 0.045                  | 0.0654                                | 0.0021                 | 0.801          | 665                                               | 24                    | 630                                               | 27                    | 786                                                  | 68                    | 210                         | 95                         | a                 |
| 0.0933                             | 0.0047                 | 0.819                              | 0.048                  | 0.0637                                | 0.0017                 |                | 608                                               | 27                    | 575                                               | 28                    | 732                                                  | 56                    | 140                         | 124                        | a                 |
| 0.1535                             | 0.0071                 | 1.611                              | 0.088                  | 0.0761                                | 0.0020                 | 0.891          | 975                                               | 34                    | 921                                               | 39                    | 1098                                                 | 53                    | 205                         | 130                        | a                 |
| 0.1440                             | 0.0072                 | 1.476                              | 0.093                  | 0.0743                                | 0.0020                 |                | 920                                               | 38                    | 867                                               | 41                    | 1050                                                 | 53                    | 177                         | 141                        | a                 |
| 0.1284                             | 0.0057                 | 1.259                              | 0.070                  | 0.0711                                | 0.0023                 | 0.846          | 827                                               | 31                    | 779                                               | 33                    | 960                                                  | 66                    | 160                         | 95                         | a                 |
| 0.1459                             | 0.0066                 | 1.505                              | 0.080                  | 0.0748                                | 0.0020                 | 0.885          | 933                                               | 32                    | 878                                               | 37                    | 1064                                                 | 53                    | 155                         | 135                        | a                 |
| 0.1576                             | 0.0079                 | 1.69                               | 0.11                   | 0.0776                                | 0.0021                 |                | 1003                                              | 42                    | 943                                               | 44                    | 1137                                                 | 55                    | 159                         | 122                        | a                 |
| 0.1576                             | 0.0079                 | 1.69                               | 0.11                   | 0.0777                                | 0.0021                 |                | 1004                                              | 42                    | 943                                               | 44                    | 1139                                                 | 53                    | 163                         | 106                        | a                 |
| 0.0905                             | 0.0045                 | 0.797                              | 0.047                  | 0.0639                                | 0.0017                 |                | 595                                               | 27                    | 558                                               | 27                    | 737                                                  | 57                    | 182                         | 112                        | a                 |
| 0.1486                             | 0.0068                 | 1.553                              | 0.084                  | 0.0758                                | 0.0020                 | 0.889          | 952                                               | 33                    | 893                                               | 38                    | 1090                                                 | 53                    | 190                         | 110                        | a                 |
| 0.0705                             | 0.0031                 | 0.585                              | 0.028                  | 0.0602                                | 0.0022                 | 0.676          | 468                                               | 18                    | 439                                               | 19                    | 613                                                  | 77                    | 205                         | 105                        | a                 |
| 0.1485                             | 0.0068                 | 1.552                              | 0.090                  | 0.0758                                | 0.0025                 | 0.863          | 951                                               | 36                    | 892                                               | 38                    | 1090                                                 | 66                    | 155                         | 150                        | a                 |
| 0.1309                             | 0.0062                 | 1.299                              | 0.065                  | 0.0720                                | 0.0020                 | 0.860          | 845                                               | 29                    | 793                                               | 35                    | 986                                                  | 57                    | 175                         | 145                        | a                 |
| 0.1336                             | 0.0067                 | 1.34                               | 0.13                   | 0.0727                                | 0.0038                 |                | 863                                               | 54                    | 808                                               | 38                    | 1005                                                 | 106                   | 176                         | 116                        | a                 |
| 0.1537                             | 0.0071                 | 1.636                              | 0.088                  | 0.0772                                | 0.0020                 | 0.891          | 984                                               | 34                    | 922                                               | 39                    | 1126                                                 | 52                    | 145                         | 130                        | a                 |
| 0.0347                             | 0.0017                 | 0.261                              | 0.018                  | 0.0545                                | 0.0021                 |                | 235                                               | 14                    | 220                                               | 11                    | 390                                                  | 89                    | 273                         | 76                         | a                 |
| 0.1531                             | 0.0071                 | 1.632                              | 0.091                  | 0.0773                                | 0.0022                 | 0.884          | 983                                               | 35                    | 918                                               | 40                    | 1129                                                 | 56                    | 245                         | 115                        | a                 |
| 0.1437                             | 0.0064                 | 1.489                              | 0.086                  | 0.0752                                | 0.0025                 | 0.852          | 926                                               | 35                    | 865                                               | 36                    | 1074                                                 | 67                    | 180                         | 95                         | a                 |
| 0.1391                             | 0.0067                 | 1.427                              | 0.076                  | 0.0744                                | 0.0029                 | 0.812          | 900                                               | 32                    | 840                                               | 38                    | 1052                                                 | 79                    | 175                         | 90                         | a                 |
| 0.1390                             | 0.0067                 | 1.426                              | 0.072                  | 0.0744                                | 0.0021                 | 0.868          | 900                                               | 30                    | 839                                               | 38                    | 1053                                                 | 56                    | 225                         | 105                        | a                 |
| 0.1430                             | 0.0069                 | 1.486                              | 0.075                  | 0.0754                                | 0.0020                 | 0.873          | 925                                               | 31                    | 862                                               | 39                    | 1078                                                 | 55                    | 170                         | 115                        | a                 |
| 0.1289                             | 0.0060                 | 1.286                              | 0.063                  | 0.0724                                | 0.0019                 | 0.863          | 839                                               | 28                    | 781                                               | 34                    | 996                                                  | 54                    | 165                         | 120                        | a                 |
| 0.1527                             | 0.0070                 | 1.638                              | 0.089                  | 0.0778                                | 0.0021                 | 0.888          | 985                                               | 34                    | 916                                               | 39                    | 1142                                                 | 53                    | 145                         | 115                        | a                 |
| 0.1345                             | 0.0063                 | 1.367                              | 0.068                  | 0.0737                                | 0.0021                 | 0.861          | 875                                               | 29                    | 813                                               | 36                    | 1033                                                 | 57                    | 140                         | 115                        | a                 |
| 0.0886                             | 0.0036                 | 0.786                              | 0.049                  | 0.0644                                | 0.0030                 | 0.684          | 589                                               | 28                    | 547                                               | 22                    | 754                                                  | 99                    | 190                         | 95                         | a                 |
| 0.1629                             | 0.0081                 | 1.808                              | 0.095                  | 0.0805                                | 0.0022                 | 0.886          | 1048                                              | 34                    | 973                                               | 45                    | 1209                                                 | 53                    | 165                         | 100                        | a                 |
| 0.1317                             | 0.0062                 | 1.336                              | 0.066                  | 0.0736                                | 0.0020                 | 0.863          | 862                                               | 29                    | 797                                               | 35                    | 1031                                                 | 55                    | 165                         | 160                        | a                 |
| 0.1608                             | 0.0076                 | 1.79                               | 0.10                   | 0.0806                                | 0.0022                 | 0.890          | 1041                                              | 37                    | 961                                               | 42                    | 1212                                                 | 54                    | 135                         | 85                         | a                 |
| 0.1464                             | 0.0071                 | 1.561                              | 0.080                  | 0.0773                                | 0.0020                 | 0.878          | 955                                               | 32                    | 881                                               | 40                    | 1130                                                 | 53                    | 140                         | 102                        | a                 |
| 0.0497                             | 0.0025                 | 0.397                              | 0.025                  | 0.0579                                | 0.0019                 |                | 339                                               | 18                    | 313                                               | 15                    | 525                                                  | 71                    | 182                         | 103                        | a                 |
| 0.0279                             | 0.0014                 | 0.209                              | 0.013                  | 0.0543                                | 0.0018                 |                | 193                                               | 11                    | 178                                               | 9                     | 383                                                  | 74                    | 157                         | 111                        | a                 |
| 0.1595                             | 0.0080                 | 1.77                               | 0.12                   | 0.0807                                | 0.0021                 |                | 1036                                              | 43                    | 954                                               | 44                    | 1213                                                 | 52                    | 257                         | 79                         | a                 |
| 0.0718                             | 0.0032                 | 0.615                              | 0.032                  | 0.0621                                | 0.0030                 | 0.519          | 486                                               | 20                    | 447                                               | 19                    | 676                                                  | 104                   | 220                         | 110                        | a                 |
| 0.0312                             | 0.0012                 | 0.237                              | 0.012                  | 0.0550                                | 0.0020                 | 0.880          | 216                                               | 10                    | 198                                               | 7                     | 412                                                  | 82                    | 180                         | 100                        | a                 |
| 0.1586                             | 0.0078                 | 1.770                              | 0.092                  | 0.0809                                | 0.0021                 | 0.884          | 1034                                              | 34                    | 949                                               | 44                    | 1219                                                 | 52                    | 205                         | 100                        | a                 |
| 0.1673                             | 0.0082                 | 1.92                               | 0.12                   | 0.0833                                | 0.0027                 | 0.878          | 1088                                              | 41                    | 997                                               | 45                    | 1275                                                 | 62                    | 270                         | 110                        | a                 |
| 0.0780                             | 0.0039                 | 0.683                              | 0.040                  | 0.0635                                | 0.0018                 |                | 529                                               | 24                    | 484                                               | 23                    | 725                                                  | 59                    | 207                         | 140                        | a                 |
| 0.01595                            | 0.00066                | 0.1161                             | 0.0054                 | 0.0528                                | 0.0021                 | 0.684          | 111                                               | 5                     | 102                                               | 4                     | 319                                                  | 92                    | 125                         | 70                         | a                 |
| 0.1211                             | 0.0061                 | 1.213                              | 0.074                  | 0.0727                                | 0.0019                 |                | 806                                               | 34                    | 737                                               | 35                    | 1004                                                 | 54                    | 217                         | 115                        | a                 |
| 0.1572                             | 0.0077                 | 1.761                              | 0.091                  | 0.0813                                | 0.0023                 | 0.872          | 1031                                              | 34                    | 941                                               | 43                    | 1228                                                 | 56                    | 160                         | 135                        | a                 |
| 0.0423                             | 0.0018                 | 0.334                              | 0.016                  | 0.0573                                | 0.0022                 | 0.886          | 293                                               | 12                    | 267                                               | 11                    | 503                                                  | 86                    | 165                         | 120                        | a                 |
| 0.0353                             | 0.0018                 | 0.273                              | 0.018                  | 0.0561                                | 0.0019                 |                | 245                                               | 14                    | 223                                               | 11                    | 458                                                  | 74                    | 152                         | 124                        | a                 |
| 0.1168                             | 0.0058                 | 1.165                              | 0.070                  | 0.0723                                | 0.0019                 |                | 784                                               | 33                    | 712                                               | 34                    | 995                                                  | 53                    | 172                         | 116                        | a                 |

| $^{206}\text{Pb}^*/^{238}\text{U}$                     | $\pm 2\sigma$<br>(abs) | $^{207}\text{Pb}^*/^{235}\text{U}$ | $\pm 2\sigma$<br>(abs) | $^{207}\text{Pb}^*/^{206}\text{Pb}^*$ | $\pm 2\sigma$<br>(abs) | corr.<br>coef. | $^{206}\text{Pb}^*/^{238}\text{U}$<br>age<br>(Ma) | $\pm 2\sigma$<br>(Ma) | $^{207}\text{Pb}^*/^{235}\text{U}$<br>age<br>(Ma) | $\pm 2\sigma$<br>(Ma) | $^{207}\text{Pb}^*/^{206}\text{Pb}^*$<br>age<br>(Ma) | $\pm 2\sigma$<br>(Ma) | Length<br>( $\mu\text{m}$ ) | Width<br>( $\mu\text{m}$ ) | Accept/<br>Reject |
|--------------------------------------------------------|------------------------|------------------------------------|------------------------|---------------------------------------|------------------------|----------------|---------------------------------------------------|-----------------------|---------------------------------------------------|-----------------------|------------------------------------------------------|-----------------------|-----------------------------|----------------------------|-------------------|
| 0.1571                                                 | 0.0076                 | 1.77                               | 0.10                   | 0.0819                                | 0.0023                 | 0.885          | 1036                                              | 38                    | 941                                               | 42                    | 1243                                                 | 55                    | 180                         | 110                        | a                 |
| 0.0222                                                 | 0.0011                 | 0.167                              | 0.013                  | 0.0544                                | 0.0027                 |                | 157                                               | 12                    | 142                                               | 7                     | 388                                                  | 112                   | 192                         | 112                        | a                 |
| 0.0375                                                 | 0.0016                 | 0.296                              | 0.014                  | 0.0571                                | 0.0022                 | 0.875          | 263                                               | 11                    | 238                                               | 10                    | 497                                                  | 85                    | 200                         | 100                        | a                 |
| 0.0444                                                 | 0.0022                 | 0.358                              | 0.034                  | 0.0585                                | 0.0036                 |                | 311                                               | 25                    | 280                                               | 14                    | 547                                                  | 133                   | 178                         | 169                        | a                 |
| 0.0262                                                 | 0.0013                 | 0.200                              | 0.012                  | 0.0555                                | 0.0018                 |                | 185                                               | 10                    | 166                                               | 8                     | 434                                                  | 74                    | 160                         | 117                        | a                 |
| 0.1560                                                 | 0.0078                 | 1.79                               | 0.12                   | 0.0832                                | 0.0022                 |                | 1042                                              | 42                    | 935                                               | 44                    | 1274                                                 | 51                    | 161                         | 111                        | a                 |
| 0.1348                                                 | 0.0067                 | 1.450                              | 0.089                  | 0.0780                                | 0.0020                 |                | 910                                               | 37                    | 815                                               | 38                    | 1148                                                 | 52                    | 146                         | 91                         | a                 |
| 0.0450                                                 | 0.0020                 | 0.370                              | 0.061                  | 0.060                                 | 0.010                  | 0.879          | 320                                               | 45                    | 284                                               | 12                    | 592                                                  | 380                   | 195                         | 95                         | a                 |
| 0.0248                                                 | 0.0010                 | 0.192                              | 0.016                  | 0.0561                                | 0.0082                 | 0.581          | 178                                               | 13                    | 158                                               | 6                     | 458                                                  | 323                   | 225                         | 140                        | a                 |
| 0.0373                                                 | 0.0015                 | 0.301                              | 0.038                  | 0.0586                                | 0.0079                 | 0.851          | 267                                               | 29                    | 236                                               | 9                     | 552                                                  | 295                   | 140                         | 100                        | a                 |
| 0.1472                                                 | 0.0070                 | 1.701                              | 0.098                  | 0.0838                                | 0.0025                 | 0.864          | 1009                                              | 37                    | 885                                               | 39                    | 1289                                                 | 59                    | 190                         | 70                         | a                 |
| 0.1615                                                 | 0.0081                 | 2.01                               | 0.13                   | 0.0904                                | 0.0024                 |                | 1120                                              | 45                    | 965                                               | 45                    | 1434                                                 | 51                    | 184                         | 111                        | a                 |
| 0.1757                                                 | 0.0088                 | 2.33                               | 0.15                   | 0.0962                                | 0.0025                 |                | 1222                                              | 47                    | 1044                                              | 48                    | 1552                                                 | 49                    | 163                         | 103                        | a                 |
| 0.1860                                                 | 0.0093                 | 2.57                               | 0.17                   | 0.1002                                | 0.0026                 |                | 1292                                              | 49                    | 1100                                              | 51                    | 1627                                                 | 49                    | 184                         | 101                        | a                 |
| 0.0408                                                 | 0.0015                 | 0.356                              | 0.020                  | 0.0633                                | 0.0028                 | 0.900          | 309                                               | 15                    | 258                                               | 10                    | 717                                                  | 96                    | 220                         | 135                        | a                 |
| 0.0496                                                 | 0.0025                 | 0.446                              | 0.049                  | 0.0652                                | 0.0047                 |                | 375                                               | 35                    | 312                                               | 15                    | 781                                                  | 151                   | 225                         | 106                        | a                 |
| 0.351                                                  | 0.018                  | 9.38                               | 0.84                   | 0.1938                                | 0.0050                 |                | 2376                                              | 82                    | 1939                                              | 84                    | 2775                                                 | 43                    | 180                         | 138                        | a                 |
| 0.00397                                                | 0.00029                | 0.0314                             | 0.0092                 | 0.057                                 | 0.018                  | *              | 31                                                | 9                     | 26                                                | 2                     | 509                                                  | 707                   | 190                         | 110                        | a                 |
| 0.0367                                                 | 0.0015                 | 0.335                              | 0.018                  | 0.0662                                | 0.0042                 | 0.814          | 293                                               | 14                    | 232                                               | 10                    | 813                                                  | 134                   | 160                         | 115                        | a                 |
| 0.0397                                                 | 0.0017                 | 0.382                              | 0.023                  | 0.0698                                | 0.0057                 | 0.801          | 328                                               | 17                    | 251                                               | 10                    | 921                                                  | 167                   | 235                         | 100                        | r                 |
| 0.1516                                                 | 0.0081                 | 2.24                               | 0.15                   | 0.1070                                | 0.0065                 | 0.629          | 1193                                              | 46                    | 910                                               | 46                    | 1748                                                 | 112                   | 195                         | 105                        | r                 |
| 0.0213                                                 | 0.0011                 | 0.196                              | 0.058                  | 0.067                                 | 0.014                  |                | 182                                               | 49                    | 136                                               | 7                     | 824                                                  | 441                   | 154                         | 93                         | r                 |
| 0.00354                                                | 0.00015                | 0.0308                             | 0.0031                 | 0.063                                 | 0.012                  | *              | 31                                                | 3                     | 23                                                | 1                     | 708                                                  | 405                   | 270                         | 95                         | r                 |
| 0.01063                                                | 0.00059                | 0.104                              | 0.033                  | 0.071                                 | 0.026                  | 0.450          | 100                                               | 30                    | 68                                                | 4                     | 957                                                  | 744                   | 210                         | 75                         | a                 |
| 0.1269                                                 | 0.0063                 | 2.10                               | 0.21                   | 0.1203                                | 0.0066                 |                | 1150                                              | 69                    | 770                                               | 36                    | 1960                                                 | 98                    | 181                         | 131                        | r                 |
| 0.00215                                                | 0.00011                | 0.0212                             | 0.0064                 | 0.072                                 | 0.016                  |                | 21                                                | 6                     | 14                                                | 1                     | 973                                                  | 450                   | 228                         | 107                        | r                 |
| 0.00554                                                | 0.00023                | 0.0566                             | 0.0044                 | 0.0742                                | 0.0098                 | *              | 56                                                | 4                     | 36                                                | 2                     | 1046                                                 | 267                   | 215                         | 110                        | r                 |
| 0.0778                                                 | 0.0031                 | 1.241                              | 0.067                  | 0.1158                                | 0.0036                 | 0.571          | 820                                               | 30                    | 483                                               | 19                    | 1892                                                 | 56                    | 145                         | 90                         | r                 |
| 0.1402                                                 | 0.0069                 | 3.25                               | 0.17                   | 0.1680                                | 0.0046                 | 0.713          | 1469                                              | 40                    | 846                                               | 39                    | 2538                                                 | 46                    | 200                         | 110                        | r                 |
| 0.0444                                                 | 0.0038                 | 0.71                               | 0.19                   | 0.115                                 | 0.031                  | 0.882          | 542                                               | 111                   | 280                                               | 24                    | 1883                                                 | 490                   | 200                         | 120                        | r                 |
| 0.0334                                                 | 0.0015                 | 0.525                              | 0.042                  | 0.114                                 | 0.015                  | 0.718          | 428                                               | 28                    | 212                                               | 9                     | 1865                                                 | 240                   | 231                         | 105                        | r                 |
| 0.01204                                                | 0.00060                | 0.218                              | 0.044                  | 0.131                                 | 0.019                  |                | 200                                               | 37                    | 77                                                | 4                     | 2117                                                 | 252                   | 173                         | 101                        | r                 |
| 0.00404                                                | 0.00020                | 0.074                              | 0.012                  | 0.133                                 | 0.015                  |                | 72                                                | 11                    | 26                                                | 1                     | 2135                                                 | 202                   | 163                         | 100                        | r                 |
| 0.01739                                                | 0.00087                | 0.47                               | 0.11                   | 0.194                                 | 0.031                  |                | 388                                               | 73                    | 111                                               | 6                     | 2777                                                 | 266                   | 249                         | 94                         | r                 |
| <b>9. Solimões River, Brazil (3.6136°S, 61.2547°W)</b> |                        |                                    |                        |                                       |                        |                |                                                   |                       |                                                   |                       |                                                      |                       |                             |                            |                   |
| 0.183                                                  | 0.017                  | 2.50                               | 0.29                   | 0.0991                                | 0.0044                 | 0.897          | 1273                                              | 85                    | 1084                                              | 95                    | 1607                                                 | 82                    | 90                          | 75                         | a                 |
| 0.180                                                  | 0.011                  | 2.39                               | 0.17                   | 0.0960                                | 0.0027                 | 0.894          | 1238                                              | 50                    | 1069                                              | 58                    | 1547                                                 | 53                    | 135                         | 80                         | a                 |
| 0.290                                                  | 0.022                  | 6.35                               | 0.54                   | 0.1585                                | 0.0042                 | 0.921          | 2025                                              | 74                    | 1644                                              | 108                   | 2440                                                 | 45                    | 90                          | 60                         | a                 |
| 0.202                                                  | 0.012                  | 2.70                               | 0.19                   | 0.0968                                | 0.0026                 | 0.908          | 1328                                              | 52                    | 1187                                              | 64                    | 1563                                                 | 51                    | 170                         | 70                         | a                 |
| 0.259                                                  | 0.013                  | 2.81                               | 0.32                   | 0.0785                                | 0.0032                 |                | 1357                                              | 85                    | 1485                                              | 67                    | 1160                                                 | 81                    | 97                          | 54                         | a                 |
| 0.235                                                  | 0.015                  | 3.39                               | 0.25                   | 0.1045                                | 0.0029                 | 0.920          | 1501                                              | 58                    | 1360                                              | 78                    | 1706                                                 | 51                    | 90                          | 90                         | a                 |
| 0.0453                                                 | 0.0023                 | 0.301                              | 0.018                  | 0.0481                                | 0.0017                 |                | 267                                               | 14                    | 286                                               | 14                    | 105                                                  | 81                    | 115                         | 85                         | a                 |
| 0.177                                                  | 0.016                  | 2.03                               | 0.25                   | 0.0830                                | 0.0046                 | 0.881          | 1124                                              | 82                    | 1051                                              | 89                    | 1269                                                 | 109                   | 90                          | 40                         | a                 |
| 0.205                                                  | 0.038                  | 2.59                               | 0.94                   | 0.092                                 | 0.020                  | 0.773          | 1299                                              | 265                   | 1204                                              | 201                   | 1458                                                 | 421                   | 80                          | 75                         | a                 |
| 0.1383                                                 | 0.0075                 | 1.179                              | 0.077                  | 0.0618                                | 0.0020                 | 0.885          | 791                                               | 36                    | 835                                               | 42                    | 668                                                  | 69                    | 75                          | 50                         | a                 |
| 0.1133                                                 | 0.0053                 | 0.919                              | 0.057                  | 0.0588                                | 0.0023                 | 0.813          | 662                                               | 30                    | 692                                               | 30                    | 562                                                  | 84                    | 121                         | 65                         | a                 |
| 0.1102                                                 | 0.0058                 | 0.889                              | 0.054                  | 0.0585                                | 0.0017                 | 0.875          | 646                                               | 29                    | 674                                               | 34                    | 548                                                  | 62                    | 100                         | 70                         | a                 |
| 0.1268                                                 | 0.0073                 | 1.069                              | 0.087                  | 0.0611                                | 0.0032                 | 0.810          | 738                                               | 43                    | 770                                               | 42                    | 644                                                  | 113                   | 130                         | 45                         | a                 |
| 0.0853                                                 | 0.0037                 | 0.648                              | 0.036                  | 0.0551                                | 0.0019                 | 0.768          | 507                                               | 22                    | 528                                               | 22                    | 416                                                  | 77                    | 160                         | 60                         | a                 |
| 0.1418                                                 | 0.0071                 | 1.260                              | 0.074                  | 0.0645                                | 0.0017                 | 0.895          | 828                                               | 33                    | 855                                               | 40                    | 756                                                  | 57                    | 105                         | 70                         | a                 |
| 0.0951                                                 | 0.0048                 | 0.752                              | 0.045                  | 0.0574                                | 0.0016                 |                | 570                                               | 26                    | 586                                               | 28                    | 505                                                  | 62                    | 142                         | 67                         | a                 |

| $^{206}\text{Pb}^*/^{238}\text{U}$ | $\pm 2\sigma$<br>(abs) | $^{207}\text{Pb}^*/^{235}\text{U}$ | $\pm 2\sigma$<br>(abs) | $^{207}\text{Pb}^*/^{206}\text{Pb}^*$ | $\pm 2\sigma$<br>(abs) | corr.<br>coef. | $^{206}\text{Pb}^*/^{238}\text{U}$<br>age<br>(Ma) | $\pm 2\sigma$<br>(Ma) | $^{207}\text{Pb}^*/^{235}\text{U}$<br>age<br>(Ma) | $\pm 2\sigma$<br>(Ma) | $^{207}\text{Pb}^*/^{206}\text{Pb}^*$<br>age<br>(Ma) | $\pm 2\sigma$<br>(Ma) | Length<br>( $\mu\text{m}$ ) | Width<br>( $\mu\text{m}$ ) | Accept/<br>Reject |
|------------------------------------|------------------------|------------------------------------|------------------------|---------------------------------------|------------------------|----------------|---------------------------------------------------|-----------------------|---------------------------------------------------|-----------------------|------------------------------------------------------|-----------------------|-----------------------------|----------------------------|-------------------|
| 0.0596                             | 0.0026                 | 0.430                              | 0.023                  | 0.0523                                | 0.0017                 | 0.696          | 363                                               | 16                    | 373                                               | 16                    | 298                                                  | 75                    | 110                         | 65                         | a                 |
| 0.176                              | 0.011                  | 1.89                               | 0.14                   | 0.0778                                | 0.0024                 | 0.903          | 1078                                              | 49                    | 1047                                              | 58                    | 1142                                                 | 62                    | 145                         | 65                         | a                 |
| 0.0652                             | 0.0033                 | 0.478                              | 0.027                  | 0.0532                                | 0.0014                 |                | 397                                               | 18                    | 407                                               | 20                    | 335                                                  | 61                    | 132                         | 67                         | a                 |
| 0.1399                             | 0.0068                 | 1.248                              | 0.073                  | 0.0647                                | 0.0019                 | 0.881          | 822                                               | 33                    | 844                                               | 38                    | 764                                                  | 61                    | 130                         | 70                         | a                 |
| 0.172                              | 0.010                  | 1.82                               | 0.13                   | 0.0766                                | 0.0022                 | 0.908          | 1051                                              | 45                    | 1023                                              | 55                    | 1112                                                 | 57                    | 135                         | 70                         | a                 |
| 0.257                              | 0.018                  | 3.52                               | 0.29                   | 0.0995                                | 0.0029                 | 0.935          | 1533                                              | 66                    | 1474                                              | 93                    | 1615                                                 | 53                    | 95                          | 60                         | a                 |
| 0.188                              | 0.012                  | 2.07                               | 0.16                   | 0.0801                                | 0.0025                 | 0.912          | 1140                                              | 53                    | 1110                                              | 64                    | 1199                                                 | 61                    | 100                         | 70                         | a                 |
| 0.290                              | 0.018                  | 4.41                               | 0.33                   | 0.1103                                | 0.0029                 | 0.935          | 1715                                              | 61                    | 1643                                              | 91                    | 1804                                                 | 48                    | 175                         | 70                         | a                 |
| 0.180                              | 0.012                  | 1.94                               | 0.38                   | 0.078                                 | 0.011                  | 0.609          | 1096                                              | 132                   | 1068                                              | 68                    | 1151                                                 | 268                   | 110                         | 40                         | a                 |
| 0.201                              | 0.012                  | 2.31                               | 0.16                   | 0.0833                                | 0.0022                 | 0.921          | 1216                                              | 49                    | 1182                                              | 64                    | 1277                                                 | 52                    | 110                         | 51                         | a                 |
| 0.263                              | 0.018                  | 3.65                               | 0.28                   | 0.1007                                | 0.0027                 | 0.937          | 1561                                              | 61                    | 1505                                              | 90                    | 1637                                                 | 49                    | 110                         | 70                         | a                 |
| 0.322                              | 0.024                  | 5.27                               | 0.51                   | 0.1186                                | 0.0047                 | 0.920          | 1865                                              | 83                    | 1801                                              | 115                   | 1936                                                 | 70                    | 95                          | 75                         | a                 |
| 0.202                              | 0.010                  | 2.16                               | 0.24                   | 0.0775                                | 0.0042                 |                | 1167                                              | 76                    | 1185                                              | 54                    | 1134                                                 | 109                   | 92                          | 76                         | a                 |
| 0.1708                             | 0.0093                 | 1.76                               | 0.13                   | 0.0748                                | 0.0029                 | 0.870          | 1032                                              | 48                    | 1017                                              | 51                    | 1064                                                 | 78                    | 165                         | 72                         | a                 |
| 0.0438                             | 0.0017                 | 0.308                              | 0.034                  | 0.0511                                | 0.0059                 | 0.861          | 273                                               | 26                    | 276                                               | 11                    | 246                                                  | 266                   | 145                         | 65                         | a                 |
| 0.182                              | 0.012                  | 1.94                               | 0.14                   | 0.0769                                | 0.0020                 | 0.925          | 1094                                              | 49                    | 1081                                              | 63                    | 1119                                                 | 53                    | 115                         | 55                         | a                 |
| 0.177                              | 0.011                  | 1.83                               | 0.13                   | 0.0753                                | 0.0022                 | 0.915          | 1058                                              | 47                    | 1049                                              | 59                    | 1077                                                 | 57                    | 210                         | 75                         | a                 |
| 0.1936                             | 0.0097                 | 2.05                               | 0.15                   | 0.0769                                | 0.0022                 |                | 1133                                              | 49                    | 1141                                              | 52                    | 1118                                                 | 56                    | 111                         | 43                         | a                 |
| 0.1223                             | 0.0062                 | 1.07                               | 0.10                   | 0.0636                                | 0.0050                 | 0.626          | 740                                               | 51                    | 744                                               | 36                    | 729                                                  | 166                   | 105                         | 55                         | a                 |
| 0.0594                             | 0.0024                 | 0.441                              | 0.022                  | 0.0538                                | 0.0018                 | 0.646          | 371                                               | 16                    | 372                                               | 14                    | 363                                                  | 73                    | 100                         | 80                         | a                 |
| 0.0450                             | 0.0017                 | 0.322                              | 0.015                  | 0.0518                                | 0.0016                 | 0.528          | 283                                               | 11                    | 284                                               | 10                    | 276                                                  | 69                    | 125                         | 60                         | a                 |
| 0.0928                             | 0.0046                 | 0.755                              | 0.072                  | 0.0590                                | 0.0034                 |                | 571                                               | 41                    | 572                                               | 27                    | 568                                                  | 127                   | 90                          | 47                         | a                 |
| 0.0604                             | 0.0025                 | 0.453                              | 0.033                  | 0.0544                                | 0.0034                 | 0.915          | 380                                               | 23                    | 378                                               | 15                    | 389                                                  | 142                   | 110                         | 60                         | a                 |
| 0.1070                             | 0.0053                 | 0.912                              | 0.061                  | 0.0619                                | 0.0021                 |                | 658                                               | 32                    | 655                                               | 31                    | 670                                                  | 73                    | 100                         | 51                         | a                 |
| 0.171                              | 0.012                  | 1.71                               | 0.17                   | 0.0724                                | 0.0041                 | 0.853          | 1013                                              | 64                    | 1020                                              | 64                    | 998                                                  | 114                   | 85                          | 95                         | a                 |
| 0.177                              | 0.013                  | 1.79                               | 0.15                   | 0.0734                                | 0.0022                 | 0.925          | 1043                                              | 54                    | 1052                                              | 69                    | 1024                                                 | 61                    | 120                         | 70                         | a                 |
| 0.0725                             | 0.0029                 | 0.565                              | 0.032                  | 0.0565                                | 0.0023                 | 0.629          | 455                                               | 20                    | 451                                               | 18                    | 472                                                  | 89                    | 75                          | 65                         | a                 |
| 0.187                              | 0.011                  | 1.93                               | 0.15                   | 0.0749                                | 0.0026                 | 0.905          | 1092                                              | 52                    | 1106                                              | 61                    | 1065                                                 | 69                    | 126                         | 60                         | a                 |
| 0.1182                             | 0.0059                 | 1.051                              | 0.076                  | 0.0645                                | 0.0025                 |                | 730                                               | 38                    | 720                                               | 34                    | 759                                                  | 82                    | 165                         | 53                         | a                 |
| 0.231                              | 0.014                  | 2.64                               | 0.19                   | 0.0828                                | 0.0023                 | 0.931          | 1311                                              | 53                    | 1340                                              | 72                    | 1264                                                 | 54                    | 95                          | 50                         | a                 |
| 0.201                              | 0.012                  | 2.13                               | 0.15                   | 0.0768                                | 0.0020                 | 0.927          | 1160                                              | 47                    | 1183                                              | 63                    | 1116                                                 | 52                    | 70                          | 65                         | a                 |
| 0.208                              | 0.013                  | 2.22                               | 0.16                   | 0.0776                                | 0.0021                 | 0.934          | 1188                                              | 52                    | 1216                                              | 71                    | 1137                                                 | 53                    | 120                         | 60                         | a                 |
| 0.1022                             | 0.0044                 | 0.875                              | 0.045                  | 0.0621                                | 0.0017                 | 0.827          | 638                                               | 24                    | 627                                               | 26                    | 678                                                  | 60                    | 95                          | 45                         | a                 |
| 0.1205                             | 0.0058                 | 1.087                              | 0.064                  | 0.0654                                | 0.0020                 | 0.851          | 747                                               | 31                    | 733                                               | 33                    | 788                                                  | 65                    | 115                         | 60                         | a                 |
| 0.0494                             | 0.0019                 | 0.368                              | 0.020                  | 0.0539                                | 0.0022                 | 0.911          | 318                                               | 15                    | 311                                               | 12                    | 367                                                  | 93                    | 140                         | 90                         | a                 |
| 0.1642                             | 0.0082                 | 1.69                               | 0.11                   | 0.0746                                | 0.0020                 |                | 1004                                              | 42                    | 980                                               | 46                    | 1057                                                 | 54                    | 147                         | 61                         | a                 |
| 0.1695                             | 0.0096                 | 1.62                               | 0.13                   | 0.0694                                | 0.0029                 | 0.873          | 978                                               | 49                    | 1010                                              | 53                    | 909                                                  | 86                    | 100                         | 65                         | a                 |
| 0.1038                             | 0.0052                 | 0.91                               | 0.11                   | 0.0634                                | 0.0048                 |                | 656                                               | 59                    | 637                                               | 30                    | 722                                                  | 161                   | 120                         | 66                         | a                 |
| 0.229                              | 0.014                  | 2.48                               | 0.22                   | 0.0783                                | 0.0035                 | 0.900          | 1265                                              | 65                    | 1331                                              | 75                    | 1155                                                 | 88                    | 65                          | 45                         | a                 |
| 0.0736                             | 0.0031                 | 0.592                              | 0.048                  | 0.0583                                | 0.0041                 | 0.930          | 472                                               | 31                    | 458                                               | 19                    | 543                                                  | 155                   | 105                         | 55                         | a                 |
| 0.1633                             | 0.0091                 | 1.70                               | 0.11                   | 0.0754                                | 0.0020                 | 0.908          | 1008                                              | 41                    | 975                                               | 50                    | 1080                                                 | 53                    | 111                         | 75                         | a                 |
| 0.221                              | 0.015                  | 2.32                               | 0.20                   | 0.0764                                | 0.0027                 | 0.924          | 1220                                              | 60                    | 1285                                              | 80                    | 1106                                                 | 71                    | 80                          | 60                         | a                 |
| 0.1631                             | 0.0086                 | 1.70                               | 0.23                   | 0.0754                                | 0.0078                 | 0.571          | 1007                                              | 87                    | 974                                               | 48                    | 1080                                                 | 207                   | 95                          | 95                         | a                 |
| 0.0473                             | 0.0024                 | 0.355                              | 0.020                  | 0.0544                                | 0.0016                 |                | 309                                               | 15                    | 298                                               | 15                    | 389                                                  | 65                    | 159                         | 106                        | a                 |
| 0.0556                             | 0.0028                 | 0.434                              | 0.027                  | 0.0567                                | 0.0019                 |                | 366                                               | 19                    | 349                                               | 17                    | 480                                                  | 73                    | 131                         | 64                         | a                 |
| 0.205                              | 0.010                  | 2.50                               | 0.19                   | 0.0884                                | 0.0027                 |                | 1273                                              | 54                    | 1204                                              | 55                    | 1392                                                 | 60                    | 123                         | 68                         | a                 |
| 0.0894                             | 0.0039                 | 0.779                              | 0.045                  | 0.0632                                | 0.0024                 | 0.734          | 585                                               | 26                    | 552                                               | 23                    | 714                                                  | 79                    | 145                         | 85                         | a                 |
| 0.1179                             | 0.0055                 | 1.130                              | 0.076                  | 0.0695                                | 0.0031                 | 0.753          | 768                                               | 36                    | 718                                               | 32                    | 914                                                  | 92                    | 75                          | 60                         | a                 |
| 0.166                              | 0.010                  | 1.85                               | 0.14                   | 0.0808                                | 0.0025                 | 0.900          | 1063                                              | 48                    | 991                                               | 57                    | 1216                                                 | 60                    | 130                         | 80                         | a                 |
| 0.1914                             | 0.0096                 | 2.30                               | 0.16                   | 0.0873                                | 0.0024                 |                | 1213                                              | 49                    | 1129                                              | 52                    | 1366                                                 | 52                    | 152                         | 53                         | a                 |
| 0.1907                             | 0.0095                 | 2.30                               | 0.16                   | 0.0875                                | 0.0024                 |                | 1213                                              | 48                    | 1125                                              | 52                    | 1372                                                 | 52                    | 76                          | 59                         | a                 |

| $^{206}\text{Pb}^*/^{238}\text{U}$                        | $\pm 2\sigma$<br>(abs) | $^{207}\text{Pb}^*/^{235}\text{U}$ | $\pm 2\sigma$<br>(abs) | $^{207}\text{Pb}^*/^{206}\text{Pb}^*$ | $\pm 2\sigma$<br>(abs) | corr.<br>coef. | $^{206}\text{Pb}^*/^{238}\text{U}$<br>age<br>(Ma) | $\pm 2\sigma$<br>(Ma) | $^{207}\text{Pb}^*/^{235}\text{U}$<br>age<br>(Ma) | $\pm 2\sigma$<br>(Ma) | $^{207}\text{Pb}^*/^{206}\text{Pb}^*$<br>age<br>(Ma) | $\pm 2\sigma$<br>(Ma) | Length<br>( $\mu\text{m}$ ) | Width<br>( $\mu\text{m}$ ) | Accept/<br>Reject |
|-----------------------------------------------------------|------------------------|------------------------------------|------------------------|---------------------------------------|------------------------|----------------|---------------------------------------------------|-----------------------|---------------------------------------------------|-----------------------|------------------------------------------------------|-----------------------|-----------------------------|----------------------------|-------------------|
| 0.0481                                                    | 0.0024                 | 0.384                              | 0.025                  | 0.0578                                | 0.0021                 |                | 330                                               | 18                    | 303                                               | 15                    | 524                                                  | 80                    | 136                         | 54                         | a                 |
| 0.1615                                                    | 0.0098                 | 1.82                               | 0.16                   | 0.0818                                | 0.0041                 | 0.826          | 1053                                              | 57                    | 965                                               | 54                    | 1242                                                 | 97                    | 120                         | 70                         | a                 |
| 0.0817                                                    | 0.0041                 | 0.724                              | 0.092                  | 0.0643                                | 0.0055                 |                | 553                                               | 54                    | 506                                               | 24                    | 752                                                  | 182                   | 100                         | 61                         | a                 |
| 0.0906                                                    | 0.0045                 | 0.83                               | 0.33                   | 0.067                                 | 0.018                  |                | 615                                               | 183                   | 559                                               | 27                    | 827                                                  | 576                   | 116                         | 62                         | a                 |
| 0.0453                                                    | 0.0023                 | 0.367                              | 0.021                  | 0.0588                                | 0.0016                 |                | 318                                               | 15                    | 285                                               | 14                    | 560                                                  | 61                    | 155                         | 65                         | a                 |
| 0.1353                                                    | 0.0068                 | 1.46                               | 0.11                   | 0.0781                                | 0.0029                 |                | 913                                               | 44                    | 818                                               | 39                    | 1148                                                 | 74                    | 145                         | 61                         | a                 |
| 0.1380                                                    | 0.0069                 | 1.52                               | 0.13                   | 0.0797                                | 0.0038                 |                | 937                                               | 52                    | 833                                               | 39                    | 1190                                                 | 94                    | 114                         | 64                         | a                 |
| 0.1643                                                    | 0.0088                 | 2.01                               | 0.17                   | 0.0888                                | 0.0047                 | 0.772          | 1119                                              | 58                    | 981                                               | 49                    | 1399                                                 | 102                   | 130                         | 70                         | a                 |
| 0.0622                                                    | 0.0026                 | 0.561                              | 0.061                  | 0.0654                                | 0.0070                 | 0.907          | 452                                               | 40                    | 389                                               | 16                    | 787                                                  | 226                   | 165                         | 70                         | a                 |
| 0.00477                                                   | 0.00024                | 0.0370                             | 0.0050                 | 0.0563                                | 0.0056                 |                | 37                                                | 5                     | 31                                                | 2                     | 465                                                  | 221                   | 121                         | 55                         | a                 |
| 0.0350                                                    | 0.0014                 | 0.301                              | 0.032                  | 0.0624                                | 0.0069                 | 0.829          | 268                                               | 25                    | 222                                               | 9                     | 688                                                  | 236                   | 130                         | 70                         | a                 |
| 0.0739                                                    | 0.0031                 | 0.749                              | 0.098                  | 0.0735                                | 0.0096                 | 0.921          | 567                                               | 57                    | 459                                               | 19                    | 1027                                                 | 265                   | 135                         | 55                         | a                 |
| 0.0723                                                    | 0.0036                 | 0.749                              | 0.071                  | 0.0751                                | 0.0037                 |                | 568                                               | 41                    | 450                                               | 22                    | 1072                                                 | 100                   | 101                         | 49                         | a                 |
| 0.155                                                     | 0.012                  | 2.48                               | 0.32                   | 0.1162                                | 0.0092                 | 0.662          | 1267                                              | 95                    | 928                                               | 68                    | 1899                                                 | 143                   | 65                          | 65                         | r                 |
| 0.257                                                     | 0.013                  | 6.49                               | 0.49                   | 0.1831                                | 0.0049                 |                | 2044                                              | 66                    | 1474                                              | 66                    | 2682                                                 | 44                    | 110                         | 55                         | r                 |
| 0.1789                                                    | 0.0089                 | 3.82                               | 0.27                   | 0.1547                                | 0.0045                 |                | 1596                                              | 58                    | 1061                                              | 49                    | 2398                                                 | 49                    | 127                         | 69                         | r                 |
| 0.00                                                      | 0.00                   | 0.0206                             | 0.0027                 | 0.0806                                | 0.0080                 |                | 21                                                | 3                     | 12                                                | 1                     | 1212                                                 | 195                   | 108                         | 63                         | r                 |
| 0.01156                                                   | 0.00054                | 0.144                              | 0.018                  | 0.090                                 | 0.012                  | 0.455          | 137                                               | 16                    | 74                                                | 3                     | 1434                                                 | 246                   | 115                         | 60                         | r                 |
| 0.230                                                     | 0.011                  | 11.3                               | 5.3                    | 0.357                                 | 0.096                  |                | 2549                                              | 437                   | 1334                                              | 61                    | 3736                                                 | 410                   | 116                         | 97                         | r                 |
| 0.00617                                                   | 0.00040                | 0.122                              | 0.033                  | 0.143                                 | 0.043                  | *              | 117                                               | 30                    | 40                                                | 3                     | 2265                                                 | 516                   | 115                         | 70                         | r                 |
| <b>10. Solimões River, Brazil (3.2979° S, 60.3071° W)</b> |                        |                                    |                        |                                       |                        |                |                                                   |                       |                                                   |                       |                                                      |                       |                             |                            |                   |
| 0.1739                                                    | 0.0098                 | 4.13                               | 0.27                   | 0.1723                                | 0.0076                 | 0.655          | 1661                                              | 52                    | 1034                                              | 54                    | 2581                                                 | 73                    | 150                         | 75                         | r                 |
| 0.00494                                                   | 0.00025                | 0.008                              | 0.021                  | 0.012                                 | 0.019                  |                | 8                                                 | 20                    | 32                                                | 2                     |                                                      |                       | 135                         | 90                         | r                 |
| 0.274                                                     | 0.019                  | 11.90                              | 0.93                   | 0.315                                 | 0.014                  | 0.665          | 2597                                              | 73                    | 1561                                              | 95                    | 3546                                                 | 70                    | 115                         | 70                         | r                 |
| 0.00174                                                   | 0.00015                | 0.0056                             | 0.0054                 | 0.023                                 | 0.018                  | *              | 6                                                 | 5                     | 11                                                | 1                     |                                                      |                       | 160                         | 70                         | r                 |
| 0.00328                                                   | 0.00016                | 0.0110                             | 0.0044                 | 0.0242                                | 0.0055                 |                | 11                                                | 4                     | 21                                                | 1                     |                                                      |                       | 154                         | 87                         | r                 |
| 0.196                                                     | 0.021                  | 3.927                              | 1.045                  | 0.145                                 | 0.022                  | 0.983          | 1619                                              | 215                   | 1154                                              | 115                   | 2291                                                 | 263                   | 155                         | 70                         | r                 |
| 0.00488                                                   | 0.00024                | 0.0220                             | 0.0071                 | 0.0327                                | 0.0061                 |                | 22                                                | 6                     | 31                                                | 2                     |                                                      |                       | 121                         | 52                         | a                 |
| 0.179                                                     | 0.010                  | 2.33                               | 0.14                   | 0.0943                                | 0.0025                 | 0.895          | 1221                                              | 42                    | 1062                                              | 55                    | 1514                                                 | 50                    | 120                         | 90                         | a                 |
| 0.1101                                                    | 0.0075                 | 0.781                              | 0.069                  | 0.0514                                | 0.0022                 | 0.872          | 586                                               | 39                    | 674                                               | 43                    | 259                                                  | 98                    | 115                         | 65                         | a                 |
| 0.174                                                     | 0.017                  | 2.16                               | 0.23                   | 0.0901                                | 0.0026                 | 0.936          | 1170                                              | 73                    | 1036                                              | 92                    | 1427                                                 | 54                    | 105                         | 100                        | a                 |
| 0.00873                                                   | 0.00044                | 0.0497                             | 0.0054                 | 0.0413                                | 0.0023                 |                | 49                                                | 5                     | 56                                                | 3                     |                                                      |                       | 137                         | 57                         | a                 |
| 0.0457                                                    | 0.0023                 | 0.283                              | 0.035                  | 0.0449                                | 0.0032                 |                | 253                                               | 25                    | 288                                               | 14                    |                                                      |                       | 102                         | 65                         | a                 |
| 0.00623                                                   | 0.00055                | 0.035                              | 0.013                  | 0.041                                 | 0.011                  | 0.212          | 35                                                | 12                    | 40                                                | 4                     |                                                      |                       | 165                         | 65                         | a                 |
| 0.0367                                                    | 0.0018                 | 0.229                              | 0.021                  | 0.0452                                | 0.0020                 |                | 209                                               | 17                    | 232                                               | 11                    |                                                      |                       | 178                         | 66                         | a                 |
| 0.0367                                                    | 0.0018                 | 0.229                              | 0.022                  | 0.0452                                | 0.0020                 |                | 209                                               | 17                    | 232                                               | 11                    |                                                      |                       | 151                         | 52                         | a                 |
| 0.00229                                                   | 0.00011                | 0.0132                             | 0.0033                 | 0.0419                                | 0.0062                 |                | 13                                                | 3                     | 15                                                | 1                     |                                                      |                       | 159                         | 63                         | a                 |
| 0.0662                                                    | 0.0029                 | 0.453                              | 0.025                  | 0.0496                                | 0.0033                 | 0.896          | 379                                               | 18                    | 413                                               | 17                    | 176                                                  | 153                   | 135                         | 90                         | a                 |
| 0.218                                                     | 0.011                  | 2.16                               | 0.15                   | 0.0720                                | 0.0023                 |                | 1169                                              | 45                    | 1271                                              | 58                    | 986                                                  | 63                    | 129                         | 58                         | a                 |
| 0.261                                                     | 0.016                  | 4.26                               | 0.31                   | 0.1184                                | 0.0032                 | 0.920          | 1685                                              | 60                    | 1494                                              | 83                    | 1932                                                 | 48                    | 150                         | 70                         | a                 |
| 0.1785                                                    | 0.0099                 | 2.09                               | 0.12                   | 0.0848                                | 0.0025                 | 0.893          | 1144                                              | 40                    | 1059                                              | 54                    | 1311                                                 | 57                    | 205                         | 65                         | a                 |
| 0.239                                                     | 0.012                  | 2.54                               | 0.16                   | 0.0769                                | 0.0020                 |                | 1282                                              | 43                    | 1382                                              | 63                    | 1119                                                 | 50                    | 158                         | 67                         | a                 |
| 0.0284                                                    | 0.0020                 | 0.180                              | 0.033                  | 0.0459                                | 0.0060                 | 0.854          | 168                                               | 28                    | 180                                               | 13                    |                                                      |                       | 110                         | 70                         | a                 |
| 0.0253                                                    | 0.0014                 | 0.159                              | 0.012                  | 0.0457                                | 0.0018                 | 0.881          | 150                                               | 10                    | 161                                               | 9                     |                                                      |                       | 145                         | 85                         | a                 |
| 0.00671                                                   | 0.00050                | 0.0406                             | 0.0076                 | 0.0439                                | 0.0056                 | 0.356          | 40                                                | 7                     | 43                                                | 3                     |                                                      |                       | 130                         | 80                         | a                 |
| 0.228                                                     | 0.011                  | 2.44                               | 0.16                   | 0.0774                                | 0.0022                 |                | 1254                                              | 44                    | 1327                                              | 60                    | 1131                                                 | 53                    | 142                         | 75                         | a                 |
| 0.1013                                                    | 0.0077                 | 0.785                              | 0.068                  | 0.0562                                | 0.0018                 | 0.899          | 588                                               | 39                    | 622                                               | 45                    | 462                                                  | 70                    | 180                         | 65                         | a                 |
| 0.217                                                     | 0.013                  | 2.81                               | 0.17                   | 0.0938                                | 0.0026                 | 0.914          | 1358                                              | 46                    | 1267                                              | 67                    | 1504                                                 | 52                    | 115                         | 756                        | a                 |
| 0.214                                                     | 0.012                  | 2.74                               | 0.16                   | 0.0925                                | 0.0025                 | 0.913          | 1339                                              | 43                    | 1253                                              | 63                    | 1479                                                 | 50                    | 135                         | 105                        | a                 |
| 0.257                                                     | 0.016                  | 3.81                               | 0.28                   | 0.1076                                | 0.0029                 | 0.927          | 1595                                              | 60                    | 1473                                              | 84                    | 1759                                                 | 49                    | 110                         | 75                         | a                 |
| 0.276                                                     | 0.017                  | 4.36                               | 0.32                   | 0.1148                                | 0.0030                 | 0.929          | 1705                                              | 61                    | 1570                                              | 88                    | 1876                                                 | 48                    | 140                         | 80                         | a                 |

| $^{206}\text{Pb}^*/^{238}\text{U}$ | $\pm 2\sigma$<br>(abs) | $^{207}\text{Pb}^*/^{235}\text{U}$ | $\pm 2\sigma$<br>(abs) | $^{207}\text{Pb}^*/^{206}\text{Pb}^*$ | $\pm 2\sigma$<br>(abs) | corr.<br>coef. | $^{206}\text{Pb}^*/^{238}\text{U}$<br>age<br>(Ma) | $\pm 2\sigma$<br>(Ma) | $^{207}\text{Pb}^*/^{235}\text{U}$<br>age<br>(Ma) | $\pm 2\sigma$<br>(Ma) | $^{207}\text{Pb}^*/^{206}\text{Pb}^*$<br>age<br>(Ma) | $\pm 2\sigma$<br>(Ma) | Length<br>( $\mu\text{m}$ ) | Width<br>( $\mu\text{m}$ ) | Accept/<br>Reject |
|------------------------------------|------------------------|------------------------------------|------------------------|---------------------------------------|------------------------|----------------|---------------------------------------------------|-----------------------|---------------------------------------------------|-----------------------|------------------------------------------------------|-----------------------|-----------------------------|----------------------------|-------------------|
| 0.0311                             | 0.0014                 | 0.204                              | 0.012                  | 0.0475                                | 0.0041                 | 0.736          | 188                                               | 11                    | 198                                               | 8                     | 75                                                   | 206                   | 135                         | 85                         | a                 |
| 0.204                              | 0.010                  | 2.08                               | 0.13                   | 0.0739                                | 0.0020                 |                | 1142                                              | 40                    | 1198                                              | 55                    | 1038                                                 | 51                    | 172                         | 69                         | a                 |
| 0.106                              | 0.013                  | 0.84                               | 0.11                   | 0.0575                                | 0.0017                 | 0.941          | 618                                               | 60                    | 647                                               | 75                    | 510                                                  | 66                    | 85                          | 80                         | a                 |
| 0.222                              | 0.014                  | 2.88                               | 0.20                   | 0.0939                                | 0.0025                 | 0.924          | 1376                                              | 53                    | 1294                                              | 72                    | 1506                                                 | 50                    | 115                         | 65                         | a                 |
| 0.217                              | 0.011                  | 2.30                               | 0.14                   | 0.0769                                | 0.0021                 |                | 1212                                              | 41                    | 1265                                              | 58                    | 1118                                                 | 51                    | 116                         | 81                         | a                 |
| 0.0371                             | 0.0019                 | 0.248                              | 0.019                  | 0.0485                                | 0.0018                 |                | 225                                               | 15                    | 235                                               | 12                    | 124                                                  | 83                    | 176                         | 62                         | a                 |
| 0.260                              | 0.017                  | 3.79                               | 0.26                   | 0.1057                                | 0.0029                 | 0.931          | 1590                                              | 56                    | 1490                                              | 89                    | 1726                                                 | 50                    | 160                         | 70                         | a                 |
| 0.250                              | 0.017                  | 3.49                               | 0.27                   | 0.1011                                | 0.0026                 | 0.936          | 1524                                              | 62                    | 1439                                              | 89                    | 1644                                                 | 49                    | 115                         | 60                         | a                 |
| 0.0612                             | 0.0038                 | 0.438                              | 0.049                  | 0.0519                                | 0.0033                 | 0.572          | 369                                               | 34                    | 383                                               | 23                    | 283                                                  | 147                   | 150                         | 60                         | a                 |
| 0.1574                             | 0.0079                 | 1.452                              | 0.087                  | 0.0669                                | 0.0019                 |                | 911                                               | 34                    | 943                                               | 44                    | 834                                                  | 55                    | 126                         | 47                         | a                 |
| 0.1860                             | 0.0093                 | 1.85                               | 0.13                   | 0.0720                                | 0.0028                 |                | 1063                                              | 44                    | 1100                                              | 51                    | 987                                                  | 72                    | 85                          | 74                         | a                 |
| 0.0445                             | 0.0025                 | 0.306                              | 0.027                  | 0.0499                                | 0.0026                 | 0.923          | 271                                               | 21                    | 280                                               | 15                    | 191                                                  | 121                   | 140                         | 65                         | a                 |
| 0.0717                             | 0.0034                 | 0.531                              | 0.026                  | 0.0537                                | 0.0014                 | 0.815          | 433                                               | 18                    | 446                                               | 21                    | 360                                                  | 59                    | 150                         | 65                         | a                 |
| 0.0549                             | 0.0024                 | 0.390                              | 0.018                  | 0.0515                                | 0.0014                 | 0.741          | 334                                               | 13                    | 344                                               | 15                    | 264                                                  | 60                    | 125                         | 90                         | a                 |
| 0.1873                             | 0.0094                 | 1.88                               | 0.12                   | 0.0729                                | 0.0021                 |                | 1075                                              | 38                    | 1107                                              | 51                    | 1010                                                 | 53                    | 129                         | 58                         | a                 |
| 0.0741                             | 0.0038                 | 0.555                              | 0.030                  | 0.0543                                | 0.0021                 | 0.752          | 448                                               | 20                    | 461                                               | 23                    | 382                                                  | 85                    | 125                         | 90                         | a                 |
| 0.0559                             | 0.0028                 | 0.402                              | 0.037                  | 0.0522                                | 0.0025                 |                | 343                                               | 23                    | 351                                               | 17                    | 292                                                  | 95                    | 132                         | 72                         | a                 |
| 0.0577                             | 0.0031                 | 0.417                              | 0.028                  | 0.0524                                | 0.0015                 | 0.783          | 354                                               | 20                    | 362                                               | 19                    | 304                                                  | 66                    | 150                         | 60                         | a                 |
| 0.1329                             | 0.0066                 | 1.17                               | 0.11                   | 0.0639                                | 0.0036                 |                | 788                                               | 50                    | 805                                               | 38                    | 740                                                  | 114                   | 141                         | 67                         | a                 |
| 0.1457                             | 0.0083                 | 1.33                               | 0.13                   | 0.0663                                | 0.0042                 | 0.782          | 859                                               | 58                    | 877                                               | 47                    | 815                                                  | 133                   | 145                         | 65                         | a                 |
| 0.0410                             | 0.0025                 | 0.284                              | 0.020                  | 0.0503                                | 0.0014                 | 0.752          | 254                                               | 16                    | 259                                               | 15                    | 207                                                  | 63                    | 135                         | 100                        | a                 |
| 0.0591                             | 0.0040                 | 0.431                              | 0.033                  | 0.0528                                | 0.0014                 | 0.841          | 364                                               | 24                    | 370                                               | 25                    | 320                                                  | 62                    | 155                         | 60                         | a                 |
| 0.1853                             | 0.0093                 | 1.89                               | 0.13                   | 0.0738                                | 0.0024                 |                | 1076                                              | 41                    | 1096                                              | 51                    | 1037                                                 | 61                    | 111                         | 62                         | a                 |
| 0.1800                             | 0.0094                 | 1.92                               | 0.11                   | 0.0773                                | 0.0021                 | 0.906          | 1088                                              | 37                    | 1067                                              | 51                    | 1129                                                 | 53                    | 145                         | 70                         | a                 |
| 0.0626                             | 0.0031                 | 0.463                              | 0.030                  | 0.0536                                | 0.0016                 |                | 386                                               | 20                    | 392                                               | 19                    | 353                                                  | 62                    | 113                         | 64                         | a                 |
| 0.0499                             | 0.0029                 | 0.357                              | 0.028                  | 0.0518                                | 0.0021                 | 0.648          | 310                                               | 21                    | 314                                               | 18                    | 277                                                  | 94                    | 150                         | 90                         | a                 |
| 0.0572                             | 0.0025                 | 0.417                              | 0.019                  | 0.0529                                | 0.0016                 | 0.699          | 354                                               | 14                    | 358                                               | 15                    | 326                                                  | 68                    | 85                          | 60                         | a                 |
| 0.0516                             | 0.0026                 | 0.372                              | 0.024                  | 0.0522                                | 0.0015                 |                | 321                                               | 17                    | 325                                               | 16                    | 294                                                  | 62                    | 87                          | 90                         | a                 |
| 0.180                              | 0.010                  | 1.91                               | 0.11                   | 0.0766                                | 0.0020                 | 0.914          | 1083                                              | 39                    | 1069                                              | 55                    | 1111                                                 | 52                    | 115                         | 75                         | a                 |
| 0.176                              | 0.011                  | 1.83                               | 0.13                   | 0.0754                                | 0.0021                 | 0.918          | 1055                                              | 46                    | 1044                                              | 59                    | 1078                                                 | 55                    | 145                         | 75                         | a                 |
| 0.186                              | 0.016                  | 1.99                               | 0.19                   | 0.0776                                | 0.0023                 | 0.939          | 1113                                              | 64                    | 1102                                              | 88                    | 1135                                                 | 60                    | 140                         | 80                         | a                 |
| 0.0715                             | 0.0036                 | 0.544                              | 0.037                  | 0.0552                                | 0.0016                 |                | 441                                               | 22                    | 445                                               | 22                    | 422                                                  | 62                    | 185                         | 57                         | a                 |
| 0.0422                             | 0.0021                 | 0.298                              | 0.024                  | 0.0511                                | 0.0020                 |                | 265                                               | 18                    | 267                                               | 13                    | 245                                                  | 86                    | 98                          | 68                         | a                 |
| 0.0888                             | 0.0044                 | 0.711                              | 0.054                  | 0.0581                                | 0.0021                 |                | 545                                               | 26                    | 549                                               | 26                    | 532                                                  | 64                    | 154                         | 60                         | a                 |
| 0.0671                             | 0.0029                 | 0.507                              | 0.025                  | 0.0548                                | 0.0023                 | 0.625          | 417                                               | 17                    | 419                                               | 18                    | 405                                                  | 93                    | 180                         | 70                         | a                 |
| 0.0519                             | 0.0026                 | 0.377                              | 0.036                  | 0.0527                                | 0.0026                 |                | 325                                               | 25                    | 326                                               | 16                    | 316                                                  | 109                   | 138                         | 85                         | a                 |
| 0.0576                             | 0.0029                 | 0.426                              | 0.031                  | 0.0535                                | 0.0019                 |                | 360                                               | 20                    | 361                                               | 18                    | 352                                                  | 71                    | 157                         | 55                         | a                 |
| 0.168                              | 0.010                  | 1.66                               | 0.12                   | 0.0721                                | 0.0020                 | 0.917          | 995                                               | 45                    | 998                                               | 56                    | 988                                                  | 56                    | 155                         | 60                         | a                 |
| 0.0502                             | 0.0022                 | 0.364                              | 0.017                  | 0.0526                                | 0.0019                 | 0.561          | 315                                               | 13                    | 316                                               | 13                    | 311                                                  | 81                    | 115                         | 85                         | a                 |
| 0.00592                            | 0.00030                | 0.0383                             | 0.0099                 | 0.0469                                | 0.0071                 |                | 38                                                | 9                     | 38                                                | 2                     | 43                                                   | 334                   | 221                         | 51                         | a                 |
| 0.0406                             | 0.0023                 | 0.288                              | 0.020                  | 0.0516                                | 0.0017                 | 0.662          | 257                                               | 16                    | 256                                               | 14                    | 266                                                  | 74                    | 115                         | 90                         | a                 |
| 0.1482                             | 0.0091                 | 1.41                               | 0.10                   | 0.0691                                | 0.0021                 | 0.902          | 894                                               | 44                    | 891                                               | 51                    | 903                                                  | 62                    | 120                         | 65                         | a                 |
| 0.1727                             | 0.0086                 | 1.76                               | 0.11                   | 0.0741                                | 0.0023                 |                | 1033                                              | 39                    | 1027                                              | 48                    | 1045                                                 | 59                    | 159                         | 63                         | a                 |
| 0.182                              | 0.011                  | 1.87                               | 0.13                   | 0.0744                                | 0.0020                 | 0.924          | 1070                                              | 47                    | 1078                                              | 61                    | 1053                                                 | 54                    | 150                         | 60                         | a                 |
| 0.0760                             | 0.0038                 | 0.598                              | 0.042                  | 0.0570                                | 0.0019                 |                | 476                                               | 24                    | 472                                               | 23                    | 493                                                  | 66                    | 151                         | 76                         | a                 |
| 0.1783                             | 0.0089                 | 1.86                               | 0.12                   | 0.0755                                | 0.0023                 |                | 1065                                              | 37                    | 1058                                              | 49                    | 1081                                                 | 51                    | 109                         | 54                         | a                 |
| 0.199                              | 0.011                  | 2.13                               | 0.13                   | 0.0776                                | 0.0020                 | 0.923          | 1159                                              | 41                    | 1172                                              | 60                    | 1136                                                 | 52                    | 125                         | 60                         | a                 |
| 0.1574                             | 0.0078                 | 1.550                              | 0.082                  | 0.0714                                | 0.0022                 | 0.876          | 950                                               | 33                    | 942                                               | 43                    | 970                                                  | 64                    | 110                         | 85                         | a                 |
| 0.0692                             | 0.0032                 | 0.538                              | 0.027                  | 0.0564                                | 0.0020                 | 0.711          | 437                                               | 18                    | 431                                               | 19                    | 466                                                  | 78                    | 105                         | 75                         | a                 |
| 0.0739                             | 0.0039                 | 0.583                              | 0.037                  | 0.0572                                | 0.0016                 | 0.821          | 467                                               | 24                    | 460                                               | 23                    | 501                                                  | 61                    | 125                         | 80                         | a                 |
| 0.0646                             | 0.0032                 | 0.499                              | 0.035                  | 0.0561                                | 0.0018                 |                | 411                                               | 21                    | 404                                               | 20                    | 454                                                  | 61                    | 151                         | 55                         | a                 |

| $^{206}\text{Pb}^*/^{238}\text{U}$ | $\pm 2\sigma$<br>(abs) | $^{207}\text{Pb}^*/^{235}\text{U}$ | $\pm 2\sigma$<br>(abs) | $^{207}\text{Pb}^*/^{206}\text{Pb}^*$ | $\pm 2\sigma$<br>(abs) | corr.<br>coef. | $^{206}\text{Pb}^*/^{238}\text{U}$<br>age<br>(Ma) | $\pm 2\sigma$<br>(Ma) | $^{207}\text{Pb}^*/^{235}\text{U}$<br>age<br>(Ma) | $\pm 2\sigma$<br>(Ma) | $^{207}\text{Pb}^*/^{206}\text{Pb}^*$<br>age<br>(Ma) | $\pm 2\sigma$<br>(Ma) | Length<br>( $\mu\text{m}$ ) | Width<br>( $\mu\text{m}$ ) | Accept/<br>Reject |
|------------------------------------|------------------------|------------------------------------|------------------------|---------------------------------------|------------------------|----------------|---------------------------------------------------|-----------------------|---------------------------------------------------|-----------------------|------------------------------------------------------|-----------------------|-----------------------------|----------------------------|-------------------|
| 0.0901                             | 0.0041                 | 0.748                              | 0.038                  | 0.0602                                | 0.0026                 | 0.708          | 567                                               | 22                    | 556                                               | 24                    | 611                                                  | 93                    | 140                         | 80                         | a                 |
| 0.1086                             | 0.0063                 | 0.949                              | 0.073                  | 0.0634                                | 0.0020                 | 0.862          | 678                                               | 38                    | 665                                               | 37                    | 722                                                  | 69                    | 90                          | 50                         | a                 |
| 0.0798                             | 0.0040                 | 0.645                              | 0.042                  | 0.0586                                | 0.0018                 |                | 506                                               | 24                    | 495                                               | 24                    | 553                                                  | 61                    | 158                         | 63                         | a                 |
| 0.0290                             | 0.0014                 | 0.203                              | 0.015                  | 0.0510                                | 0.0017                 |                | 188                                               | 12                    | 184                                               | 9                     | 239                                                  | 73                    | 127                         | 85                         | a                 |
| 0.1660                             | 0.0083                 | 1.71                               | 0.10                   | 0.0746                                | 0.0020                 |                | 1011                                              | 36                    | 990                                               | 46                    | 1059                                                 | 51                    | 136                         | 68                         | a                 |
| 0.1675                             | 0.0088                 | 1.736                              | 0.096                  | 0.0751                                | 0.0021                 | 0.899          | 1022                                              | 36                    | 999                                               | 49                    | 1072                                                 | 56                    | 160                         | 60                         | a                 |
| 0.1908                             | 0.0095                 | 2.12                               | 0.13                   | 0.0805                                | 0.0024                 |                | 1155                                              | 41                    | 1126                                              | 52                    | 1210                                                 | 56                    | 166                         | 50                         | a                 |
| 0.1304                             | 0.0071                 | 1.222                              | 0.081                  | 0.0679                                | 0.0020                 | 0.877          | 810                                               | 37                    | 790                                               | 40                    | 867                                                  | 62                    | 115                         | 100                        | a                 |
| 0.0550                             | 0.0028                 | 0.418                              | 0.028                  | 0.0551                                | 0.0018                 |                | 355                                               | 19                    | 345                                               | 17                    | 416                                                  | 68                    | 122                         | 85                         | a                 |
| 0.1457                             | 0.0076                 | 1.428                              | 0.079                  | 0.0711                                | 0.0021                 | 0.884          | 901                                               | 33                    | 877                                               | 43                    | 960                                                  | 59                    | 125                         | 75                         | a                 |
| 0.202                              | 0.012                  | 2.07                               | 0.18                   | 0.0744                                | 0.0031                 | 0.896          | 1138                                              | 58                    | 1185                                              | 67                    | 1051                                                 | 84                    | 110                         | 90                         | a                 |
| 0.0304                             | 0.0015                 | 0.217                              | 0.014                  | 0.0517                                | 0.0015                 |                | 199                                               | 11                    | 193                                               | 10                    | 274                                                  | 62                    | 150                         | 83                         | a                 |
| 0.0588                             | 0.0025                 | 0.458                              | 0.023                  | 0.0566                                | 0.0026                 | 0.466          | 383                                               | 16                    | 368                                               | 15                    | 474                                                  | 100                   | 130                         | 55                         | a                 |
| 0.0728                             | 0.0036                 | 0.591                              | 0.039                  | 0.0589                                | 0.0018                 |                | 472                                               | 23                    | 453                                               | 22                    | 564                                                  | 63                    | 155                         | 75                         | a                 |
| 0.01997                            | 0.00100                | 0.140                              | 0.017                  | 0.0508                                | 0.0035                 |                | 133                                               | 14                    | 127                                               | 6                     | 230                                                  | 151                   | 144                         | 70                         | a                 |
| 0.1574                             | 0.0079                 | 1.631                              | 0.097                  | 0.0752                                | 0.0021                 |                | 982                                               | 36                    | 942                                               | 44                    | 1073                                                 | 52                    | 122                         | 41                         | a                 |
| 0.1195                             | 0.0060                 | 1.113                              | 0.067                  | 0.0676                                | 0.0018                 |                | 760                                               | 30                    | 728                                               | 34                    | 855                                                  | 53                    | 118                         | 65                         | a                 |
| 0.1611                             | 0.0081                 | 1.69                               | 0.10                   | 0.0761                                | 0.0020                 |                | 1005                                              | 35                    | 963                                               | 45                    | 1099                                                 | 50                    | 127                         | 73                         | a                 |
| 0.0219                             | 0.0011                 | 0.155                              | 0.012                  | 0.0512                                | 0.0017                 |                | 146                                               | 9                     | 140                                               | 7                     | 248                                                  | 68                    | 134                         | 75                         | a                 |
| 0.0661                             | 0.0036                 | 0.530                              | 0.043                  | 0.0581                                | 0.0025                 | 0.685          | 432                                               | 29                    | 413                                               | 22                    | 535                                                  | 94                    | 170                         | 75                         | a                 |
| 0.01503                            | 0.00075                | 0.104                              | 0.015                  | 0.0503                                | 0.0042                 |                | 101                                               | 13                    | 96                                                | 5                     | 210                                                  | 183                   | 196                         | 55                         | a                 |
| 0.0753                             | 0.0061                 | 0.62                               | 0.24                   | 0.060                                 | 0.018                  | 0.941          | 493                                               | 153                   | 468                                               | 36                    | 607                                                  | 636                   | 130                         | 55                         | a                 |
| 0.0550                             | 0.0024                 | 0.432                              | 0.022                  | 0.0569                                | 0.0028                 | 0.898          | 365                                               | 16                    | 345                                               | 15                    | 489                                                  | 108                   | 145                         | 65                         | a                 |
| 0.1714                             | 0.0086                 | 1.89                               | 0.13                   | 0.0800                                | 0.0029                 |                | 1078                                              | 44                    | 1020                                              | 47                    | 1196                                                 | 68                    | 122                         | 71                         | a                 |
| 0.1229                             | 0.0058                 | 1.179                              | 0.064                  | 0.0696                                | 0.0032                 | 0.756          | 791                                               | 30                    | 747                                               | 33                    | 917                                                  | 95                    | 185                         | 75                         | a                 |
| 0.1623                             | 0.0081                 | 1.75                               | 0.11                   | 0.0782                                | 0.0022                 |                | 1027                                              | 36                    | 970                                               | 45                    | 1151                                                 | 51                    | 139                         | 89                         | a                 |
| 0.1592                             | 0.0080                 | 1.70                               | 0.10                   | 0.0775                                | 0.0022                 |                | 1009                                              | 37                    | 953                                               | 44                    | 1134                                                 | 55                    | 152                         | 66                         | a                 |
| 0.0676                             | 0.0034                 | 0.554                              | 0.034                  | 0.0594                                | 0.0041                 | 0.904          | 448                                               | 22                    | 422                                               | 20                    | 582                                                  | 148                   | 125                         | 70                         | a                 |
| 0.232                              | 0.024                  | 2.28                               | 0.29                   | 0.0714                                | 0.0030                 | 0.948          | 1207                                              | 89                    | 1344                                              | 127                   | 968                                                  | 85                    | 150                         | 60                         | a                 |
| 0.1393                             | 0.0070                 | 1.413                              | 0.084                  | 0.0736                                | 0.0020                 |                | 894                                               | 33                    | 841                                               | 40                    | 1029                                                 | 52                    | 172                         | 47                         | a                 |
| 0.224                              | 0.011                  | 2.94                               | 0.18                   | 0.0952                                | 0.0025                 |                | 1393                                              | 45                    | 1304                                              | 59                    | 1532                                                 | 48                    | 101                         | 71                         | a                 |
| 0.0877                             | 0.0047                 | 0.768                              | 0.049                  | 0.0636                                | 0.0017                 | 0.840          | 579                                               | 28                    | 542                                               | 28                    | 727                                                  | 58                    | 130                         | 90                         | a                 |
| 0.0966                             | 0.0054                 | 0.876                              | 0.094                  | 0.0657                                | 0.0048                 | 0.574          | 639                                               | 51                    | 595                                               | 32                    | 798                                                  | 153                   | 110                         | 80                         | a                 |
| 0.1532                             | 0.0076                 | 1.646                              | 0.086                  | 0.0779                                | 0.0021                 | 0.880          | 988                                               | 33                    | 919                                               | 42                    | 1145                                                 | 54                    | 140                         | 70                         | a                 |
| 0.1557                             | 0.0080                 | 1.687                              | 0.091                  | 0.0786                                | 0.0022                 | 0.885          | 1004                                              | 35                    | 933                                               | 45                    | 1161                                                 | 55                    | 115                         | 75                         | a                 |
| 0.0916                             | 0.0046                 | 0.819                              | 0.065                  | 0.0649                                | 0.0028                 |                | 607                                               | 33                    | 565                                               | 27                    | 770                                                  | 83                    | 137                         | 60                         | a                 |
| 0.1846                             | 0.0092                 | 2.20                               | 0.15                   | 0.0864                                | 0.0029                 |                | 1181                                              | 44                    | 1092                                              | 50                    | 1348                                                 | 58                    | 130                         | 92                         | a                 |
| 0.0593                             | 0.0030                 | 0.488                              | 0.035                  | 0.0597                                | 0.0021                 |                | 404                                               | 22                    | 372                                               | 18                    | 592                                                  | 70                    | 127                         | 85                         | a                 |
| 0.1316                             | 0.0066                 | 1.361                              | 0.080                  | 0.0750                                | 0.0020                 |                | 872                                               | 33                    | 797                                               | 38                    | 1069                                                 | 52                    | 131                         | 61                         | a                 |
| 0.0404                             | 0.0020                 | 0.319                              | 0.022                  | 0.0572                                | 0.0053                 | 0.806          | 281                                               | 17                    | 256                                               | 12                    | 500                                                  | 203                   | 125                         | 60                         | a                 |
| 0.1378                             | 0.0069                 | 1.467                              | 0.087                  | 0.0772                                | 0.0021                 |                | 917                                               | 34                    | 832                                               | 39                    | 1126                                                 | 51                    | 111                         | 70                         | a                 |
| 0.1564                             | 0.0078                 | 1.77                               | 0.10                   | 0.0820                                | 0.0022                 |                | 1033                                              | 36                    | 937                                               | 44                    | 1245                                                 | 50                    | 124                         | 66                         | a                 |
| 0.211                              | 0.011                  | 2.83                               | 0.19                   | 0.0973                                | 0.0030                 |                | 1364                                              | 48                    | 1234                                              | 56                    | 1573                                                 | 55                    | 110                         | 64                         | a                 |
| 0.0289                             | 0.0013                 | 0.221                              | 0.011                  | 0.0556                                | 0.0022                 | 0.842          | 203                                               | 9                     | 183                                               | 8                     | 437                                                  | 89                    | 165                         | 70                         | a                 |
| 0.00489                            | 0.00026                | 0.0349                             | 0.0062                 | 0.052                                 | 0.018                  | *              | 35                                                | 6                     | 31                                                | 2                     | 279                                                  | 800                   | 140                         | 85                         | a                 |
| 0.0548                             | 0.0036                 | 0.456                              | 0.060                  | 0.0604                                | 0.0050                 | 0.932          | 382                                               | 42                    | 344                                               | 22                    | 619                                                  | 180                   | 150                         | 60                         | a                 |
| 0.1658                             | 0.0083                 | 1.96                               | 0.11                   | 0.0858                                | 0.0023                 |                | 1102                                              | 37                    | 989                                               | 46                    | 1333                                                 | 49                    | 134                         | 76                         | a                 |
| 0.0452                             | 0.0020                 | 0.368                              | 0.017                  | 0.0590                                | 0.0017                 | 0.591          | 318                                               | 13                    | 285                                               | 12                    | 568                                                  | 61                    | 125                         | 55                         | a                 |
| 0.0531                             | 0.0040                 | 0.444                              | 0.072                  | 0.0607                                | 0.0065                 | 0.926          | 373                                               | 50                    | 334                                               | 24                    | 627                                                  | 232                   | 140                         | 60                         | a                 |
| 0.0452                             | 0.0062                 | 0.373                              | 0.074                  | 0.0599                                | 0.0057                 | 0.547          | 322                                               | 55                    | 285                                               | 38                    | 601                                                  | 205                   | 120                         | 65                         | a                 |
| 0.0328                             | 0.0016                 | 0.262                              | 0.022                  | 0.0578                                | 0.0025                 |                | 236                                               | 16                    | 208                                               | 10                    | 522                                                  | 85                    | 174                         | 95                         | a                 |

| $^{206}\text{Pb}^*/^{238}\text{U}$                    | $\pm 2\sigma$<br>(abs) | $^{207}\text{Pb}^*/^{235}\text{U}$ | $\pm 2\sigma$<br>(abs) | $^{207}\text{Pb}^*/^{206}\text{Pb}^*$ | $\pm 2\sigma$<br>(abs) | corr.<br>coef. | $^{206}\text{Pb}^*/^{238}\text{U}$<br>age<br>(Ma) | $\pm 2\sigma$<br>(Ma) | $^{207}\text{Pb}^*/^{235}\text{U}$<br>age<br>(Ma) | $\pm 2\sigma$<br>(Ma) | $^{207}\text{Pb}^*/^{206}\text{Pb}^*$<br>age<br>(Ma) | $\pm 2\sigma$<br>(Ma) | Length<br>( $\mu\text{m}$ ) | Width<br>( $\mu\text{m}$ ) | Accept/<br>Reject |
|-------------------------------------------------------|------------------------|------------------------------------|------------------------|---------------------------------------|------------------------|----------------|---------------------------------------------------|-----------------------|---------------------------------------------------|-----------------------|------------------------------------------------------|-----------------------|-----------------------------|----------------------------|-------------------|
| 0.1055                                                | 0.0060                 | 1.058                              | 0.070                  | 0.0728                                | 0.0019                 | 0.863          | 733                                               | 34                    | 646                                               | 35                    | 1008                                                 | 54                    | 175                         | 80                         | a                 |
| 0.1199                                                | 0.0060                 | 1.267                              | 0.075                  | 0.0766                                | 0.0021                 |                | 831                                               | 32                    | 730                                               | 35                    | 1112                                                 | 51                    | 152                         | 60                         | a                 |
| 0.0291                                                | 0.0013                 | 0.233                              | 0.016                  | 0.0581                                | 0.0063                 | 0.694          | 213                                               | 14                    | 185                                               | 8                     | 534                                                  | 237                   | 170                         | 75                         | a                 |
| 0.212                                                 | 0.011                  | 3.07                               | 0.34                   | 0.1053                                | 0.0066                 |                | 1426                                              | 80                    | 1237                                              | 57                    | 1720                                                 | 110                   | 116                         | 50                         | a                 |
| 0.0765                                                | 0.0035                 | 0.757                              | 0.042                  | 0.0717                                | 0.0042                 | 0.921          | 572                                               | 24                    | 475                                               | 21                    | 979                                                  | 119                   | 120                         | 75                         | a                 |
| 0.1553                                                | 0.0099                 | 2.05                               | 0.15                   | 0.0957                                | 0.0026                 | 0.892          | 1132                                              | 50                    | 931                                               | 55                    | 1542                                                 | 51                    | 140                         | 85                         | a                 |
| 0.1334                                                | 0.0067                 | 1.65                               | 0.11                   | 0.0898                                | 0.0028                 |                | 990                                               | 39                    | 807                                               | 38                    | 1422                                                 | 55                    | 219                         | 97                         | a                 |
| 0.00945                                               | 0.00041                | 0.0765                             | 0.0051                 | 0.0587                                | 0.0059                 | *              | 75                                                | 5                     | 61                                                | 3                     | 555                                                  | 221                   | 120                         | 55                         | a                 |
| 0.0821                                                | 0.0041                 | 0.862                              | 0.055                  | 0.0762                                | 0.0021                 |                | 631                                               | 27                    | 508                                               | 24                    | 1099                                                 | 51                    | 201                         | 70                         | a                 |
| 0.122                                                 | 0.012                  | 1.48                               | 0.17                   | 0.0883                                | 0.0025                 | 0.916          | 922                                               | 68                    | 740                                               | 71                    | 1389                                                 | 53                    | 110                         | 70                         | a                 |
| 0.0383                                                | 0.0016                 | 0.361                              | 0.021                  | 0.0683                                | 0.0053                 | 0.801          | 313                                               | 16                    | 242                                               | 10                    | 879                                                  | 161                   | 125                         | 70                         | a                 |
| 0.00449                                               | 0.00022                | 0.038                              | 0.010                  | 0.0606                                | 0.0098                 |                | 37                                                | 9                     | 29                                                | 1                     | 626                                                  | 313                   | 102                         | 71                         | a                 |
| 0.0545                                                | 0.0024                 | 0.554                              | 0.029                  | 0.0737                                | 0.0038                 | 0.896          | 448                                               | 19                    | 342                                               | 15                    | 1033                                                 | 105                   | 125                         | 110                        | r                 |
| 0.0823                                                | 0.0045                 | 0.937                              | 0.075                  | 0.0825                                | 0.0091                 | 0.903          | 671                                               | 40                    | 510                                               | 27                    | 1258                                                 | 216                   | 135                         | 55                         | r                 |
| 0.0251                                                | 0.0030                 | 0.231                              | 0.089                  | 0.067                                 | 0.019                  | 0.827          | 211                                               | 74                    | 160                                               | 19                    | 838                                                  | 605                   | 145                         | 75                         | a                 |
| 0.103                                                 | 0.017                  | 1.29                               | 0.25                   | 0.0913                                | 0.0031                 | 0.924          | 841                                               | 109                   | 629                                               | 100                   | 1452                                                 | 65                    | 60                          | 35                         | r                 |
| 0.151                                                 | 0.050                  | 2.36                               | 0.83                   | 0.1130                                | 0.0035                 | 0.971          | 1229                                              | 250                   | 908                                               | 279                   | 1848                                                 | 55                    | 190                         | 90                         | r                 |
| 0.0379                                                | 0.0024                 | 0.379                              | 0.026                  | 0.0725                                | 0.0027                 | 0.916          | 326                                               | 19                    | 240                                               | 15                    | 1001                                                 | 76                    | 115                         | 60                         | r                 |
| 0.1410                                                | 0.0071                 | 2.15                               | 0.13                   | 0.1104                                | 0.0030                 |                | 1164                                              | 39                    | 850                                               | 40                    | 1806                                                 | 47                    | 116                         | 71                         | r                 |
| 0.0374                                                | 0.0016                 | 0.380                              | 0.018                  | 0.0736                                | 0.0022                 | 0.903          | 327                                               | 13                    | 237                                               | 10                    | 1032                                                 | 60                    | 82                          | 60                         | r                 |
| 0.0704                                                | 0.0031                 | 0.82                               | 0.19                   | 0.085                                 | 0.038                  | 0.843          | 610                                               | 106                   | 439                                               | 19                    | 1311                                                 | 862                   | 125                         | 70                         | r                 |
| 0.00418                                               | 0.00042                | 0.0381                             | 0.0077                 | 0.0661                                | 0.0073                 | 0.099          | 38                                                | 8                     | 27                                                | 3                     | 810                                                  | 233                   | 100                         | 90                         | r                 |
| 0.00346                                               | 0.00017                | 0.033                              | 0.019                  | 0.068                                 | 0.024                  |                | 33                                                | 17                    | 22                                                | 1                     | 874                                                  | 674                   | 141                         | 78                         | r                 |
| 0.1121                                                | 0.0056                 | 1.68                               | 0.15                   | 0.1086                                | 0.0046                 |                | 1000                                              | 53                    | 685                                               | 33                    | 1776                                                 | 73                    | 148                         | 66                         | r                 |
| 0.1713                                                | 0.0086                 | 3.64                               | 0.49                   | 0.154                                 | 0.013                  |                | 1559                                              | 102                   | 1019                                              | 47                    | 2394                                                 | 139                   | 105                         | 85                         | r                 |
| 0.0870                                                | 0.0068                 | 1.32                               | 0.14                   | 0.1100                                | 0.0041                 | 0.740          | 854                                               | 62                    | 538                                               | 41                    | 1799                                                 | 69                    | 145                         | 80                         | r                 |
| 0.102                                                 | 0.023                  | 1.71                               | 0.43                   | 0.1221                                | 0.0037                 | 0.935          | 1013                                              | 162                   | 624                                               | 136                   | 1987                                                 | 54                    | 120                         | 65                         | r                 |
| 0.00794                                               | 0.00034                | 0.0863                             | 0.0089                 | 0.079                                 | 0.015                  | *              | 84                                                | 8                     | 51                                                | 2                     | 1168                                                 | 386                   | 110                         | 70                         | r                 |
| 0.00                                                  | 0.00                   | 0.0035                             | 0.0019                 | 0.081                                 | 0.026                  |                | 4                                                 | 2                     | 2                                                 | 0                     | 1218                                                 | 591                   | 184                         | 88                         | r                 |
| 0.0231                                                | 0.0012                 | 0.296                              | 0.029                  | 0.0929                                | 0.0040                 |                | 263                                               | 21                    | 147                                               | 7                     | 1486                                                 | 76                    | 184                         | 55                         | r                 |
| 0.0547                                                | 0.0027                 | 0.85                               | 0.57                   | 0.113                                 | 0.039                  |                | 626                                               | 299                   | 343                                               | 17                    | 1851                                                 | 596                   | 131                         | 55                         | r                 |
| 0.00476                                               | 0.00022                | 0.0569                             | 0.0057                 | 0.087                                 | 0.016                  | *              | 56                                                | 5                     | 31                                                | 1                     | 1353                                                 | 354                   | 220                         | 80                         | r                 |
| 0.095                                                 | 0.010                  | 1.97                               | 0.23                   | 0.150                                 | 0.012                  | 0.960          | 1105                                              | 80                    | 586                                               | 61                    | 2349                                                 | 132                   | 130                         | 80                         | r                 |
| 0.0784                                                | 0.0050                 | 1.47                               | 0.16                   | 0.1362                                | 0.0068                 | 0.965          | 919                                               | 66                    | 487                                               | 30                    | 2180                                                 | 87                    | 260                         | 80                         | r                 |
| 0.01218                                               | 0.00064                | 0.157                              | 0.025                  | 0.094                                 | 0.028                  | *              | 148                                               | 22                    | 78                                                | 4                     | 1500                                                 | 559                   | 115                         | 60                         | r                 |
| 0.0261                                                | 0.0013                 | 0.375                              | 0.030                  | 0.1043                                | 0.0039                 |                | 323                                               | 20                    | 166                                               | 8                     | 1701                                                 | 61                    | 150                         | 63                         | r                 |
| 0.0735                                                | 0.0088                 | 1.64                               | 0.81                   | 0.162                                 | 0.059                  | 0.942          | 986                                               | 313                   | 457                                               | 53                    | 2474                                                 | 614                   | 175                         | 75                         | r                 |
| 0.00296                                               | 0.00014                | 0.0598                             | 0.0048                 | 0.146                                 | 0.017                  | *              | 59                                                | 5                     | 19                                                | 1                     | 2305                                                 | 202                   | 150                         | 70                         | r                 |
| <b>11. Amazon River, Brazil (3.0708°S, 59.7117°W)</b> |                        |                                    |                        |                                       |                        |                |                                                   |                       |                                                   |                       |                                                      |                       |                             |                            |                   |
| 0.00222                                               | 0.00012                | 0.0085                             | 0.0042                 | 0.028                                 | 0.026                  | *              | 9                                                 | 4                     | 14                                                | 1                     |                                                      |                       | 265                         | 150                        | r                 |
| 0.00581                                               | 0.00027                | 0.0240                             | 0.0052                 | 0.030                                 | 0.012                  | *              | 24                                                | 5                     | 37                                                | 2                     |                                                      |                       | 190                         | 150                        | r                 |
| 0.263                                                 | 0.018                  | 7.04                               | 0.63                   | 0.194                                 | 0.011                  | 0.736          | 2116                                              | 80                    | 1505                                              | 91                    | 2777                                                 | 95                    | 200                         | 110                        | r                 |
| 0.00564                                               | 0.00025                | 0.0256                             | 0.0023                 | 0.0330                                | 0.0044                 | *              | 26                                                | 2                     | 36                                                | 2                     |                                                      |                       | 205                         | 95                         | a                 |
| 0.00186                                               | 0.00010                | 0.0090                             | 0.0033                 | 0.035                                 | 0.024                  | *              | 9                                                 | 3                     | 12                                                | 1                     |                                                      |                       | 145                         | 125                        | a                 |
| 0.00883                                               | 0.00048                | 0.0453                             | 0.0071                 | 0.0372                                | 0.0082                 | *              | 45                                                | 7                     | 57                                                | 3                     |                                                      |                       | 175                         | 135                        | a                 |
| 0.00383                                               | 0.00018                | 0.0195                             | 0.0037                 | 0.037                                 | 0.013                  | *              | 20                                                | 4                     | 25                                                | 1                     |                                                      |                       | 150                         | 110                        | a                 |
| 0.302                                                 | 0.019                  | 6.86                               | 0.46                   | 0.1647                                | 0.0048                 | 0.900          | 2094                                              | 60                    | 1702                                              | 96                    | 2504                                                 | 49                    | 150                         | 110                        | a                 |
| 0.0379                                                | 0.0018                 | 0.235                              | 0.019                  | 0.0451                                | 0.0054                 | 0.778          | 215                                               | 16                    | 240                                               | 11                    | -53                                                  | 292                   | 330                         | 110                        | a                 |
| 0.0393                                                | 0.0019                 | 0.251                              | 0.015                  | 0.0462                                | 0.0024                 | 0.869          | 227                                               | 12                    | 249                                               | 12                    | 7                                                    | 127                   | 245                         | 100                        | a                 |
| 0.00561                                               | 0.00026                | 0.0330                             | 0.0054                 | 0.043                                 | 0.012                  | *              | 33                                                | 5                     | 36                                                | 2                     |                                                      |                       | 200                         | 105                        | a                 |
| 0.1712                                                | 0.0094                 | 1.94                               | 0.12                   | 0.0823                                | 0.0026                 | 0.882          | 1096                                              | 42                    | 1019                                              | 60                    | 1252                                                 | 63                    | 185                         | 135                        | a                 |

| $^{206}\text{Pb}^*/^{238}\text{U}$ | $\pm 2\sigma$<br>(abs) | $^{207}\text{Pb}^*/^{235}\text{U}$ | $\pm 2\sigma$<br>(abs) | $^{207}\text{Pb}^*/^{206}\text{Pb}^*$ | $\pm 2\sigma$<br>(abs) | corr.<br>coef. | $^{206}\text{Pb}^*/^{238}\text{U}$<br>age<br>(Ma) | $\pm 2\sigma$<br>(Ma) | $^{207}\text{Pb}^*/^{235}\text{U}$<br>age<br>(Ma) | $\pm 2\sigma$<br>(Ma) | $^{207}\text{Pb}^*/^{206}\text{Pb}^*$<br>age<br>(Ma) | $\pm 2\sigma$<br>(Ma) | Length<br>( $\mu\text{m}$ ) | Width<br>( $\mu\text{m}$ ) | Accept/<br>Reject |
|------------------------------------|------------------------|------------------------------------|------------------------|---------------------------------------|------------------------|----------------|---------------------------------------------------|-----------------------|---------------------------------------------------|-----------------------|------------------------------------------------------|-----------------------|-----------------------------|----------------------------|-------------------|
| 0.299                              | 0.018                  | 5.41                               | 0.34                   | 0.1314                                | 0.0034                 | 0.921          | 1887                                              | 54                    | 1684                                              | 89                    | 2117                                                 | 46                    | 165                         | 130                        | a                 |
| 0.1757                             | 0.0091                 | 1.98                               | 0.11                   | 0.0819                                | 0.0022                 | 0.899          | 1110                                              | 37                    | 1043                                              | 50                    | 1244                                                 | 52                    | 130                         | 140                        | a                 |
| 0.231                              | 0.013                  | 3.14                               | 0.19                   | 0.0983                                | 0.0026                 | 0.917          | 1442                                              | 46                    | 1342                                              | 83                    | 1593                                                 | 49                    | 170                         | 105                        | a                 |
| 0.235                              | 0.013                  | 3.20                               | 0.20                   | 0.0986                                | 0.0027                 | 0.917          | 1457                                              | 47                    | 1363                                              | 85                    | 1597                                                 | 50                    | 190                         | 140                        | a                 |
| 0.1774                             | 0.0092                 | 1.97                               | 0.11                   | 0.0805                                | 0.0022                 | 0.900          | 1105                                              | 37                    | 1053                                              | 50                    | 1209                                                 | 53                    | 230                         | 115                        | a                 |
| 0.205                              | 0.012                  | 2.48                               | 0.15                   | 0.0880                                | 0.0025                 | 0.914          | 1267                                              | 45                    | 1200                                              | 64                    | 1382                                                 | 54                    | 145                         | 110                        | a                 |
| 0.184                              | 0.010                  | 2.07                               | 0.12                   | 0.0818                                | 0.0022                 | 0.909          | 1140                                              | 39                    | 1087                                              | 55                    | 1242                                                 | 52                    | 220                         | 125                        | a                 |
| 0.1197                             | 0.0059                 | 0.992                              | 0.053                  | 0.0601                                | 0.0017                 | 0.876          | 700                                               | 27                    | 729                                               | 38                    | 607                                                  | 61                    | 160                         | 75                         | a                 |
| 0.0973                             | 0.0047                 | 0.761                              | 0.040                  | 0.0567                                | 0.0018                 | 0.833          | 575                                               | 23                    | 598                                               | 28                    | 482                                                  | 69                    | 125                         | 100                        | a                 |
| 0.0620                             | 0.0029                 | 0.444                              | 0.027                  | 0.0519                                | 0.0034                 | 0.898          | 373                                               | 19                    | 388                                               | 17                    | 282                                                  | 151                   | 145                         | 115                        | a                 |
| 0.1806                             | 0.0097                 | 2.00                               | 0.12                   | 0.0804                                | 0.0029                 | 0.873          | 1116                                              | 41                    | 1070                                              | 62                    | 1206                                                 | 72                    | 170                         | 125                        | a                 |
| 0.1708                             | 0.0088                 | 1.83                               | 0.11                   | 0.0777                                | 0.0038                 | 0.815          | 1056                                              | 40                    | 1016                                              | 48                    | 1138                                                 | 97                    | 200                         | 110                        | a                 |
| 0.1663                             | 0.0085                 | 1.565                              | 0.097                  | 0.0683                                | 0.0037                 | 0.814          | 957                                               | 39                    | 992                                               | 47                    | 877                                                  | 111                   | 170                         | 115                        | a                 |
| 0.1723                             | 0.0093                 | 1.84                               | 0.11                   | 0.0776                                | 0.0034                 | 0.844          | 1061                                              | 40                    | 1025                                              | 51                    | 1137                                                 | 87                    | 115                         | 140                        | a                 |
| 0.186                              | 0.010                  | 2.08                               | 0.12                   | 0.0809                                | 0.0021                 | 0.910          | 1141                                              | 39                    | 1099                                              | 64                    | 1220                                                 | 52                    | 160                         | 125                        | a                 |
| 0.180                              | 0.010                  | 1.97                               | 0.13                   | 0.0794                                | 0.0036                 | 0.847          | 1105                                              | 46                    | 1066                                              | 55                    | 1181                                                 | 91                    | 155                         | 100                        | a                 |
| 0.195                              | 0.011                  | 2.23                               | 0.13                   | 0.0830                                | 0.0026                 | 0.896          | 1191                                              | 41                    | 1149                                              | 57                    | 1268                                                 | 61                    | 160                         | 130                        | a                 |
| 0.1099                             | 0.0053                 | 0.904                              | 0.050                  | 0.0597                                | 0.0026                 | 0.781          | 654                                               | 27                    | 672                                               | 31                    | 591                                                  | 95                    | 165                         | 115                        | a                 |
| 0.193                              | 0.010                  | 2.18                               | 0.13                   | 0.0819                                | 0.0024                 | 0.905          | 1175                                              | 40                    | 1138                                              | 57                    | 1242                                                 | 56                    | 180                         | 95                         | a                 |
| 0.0608                             | 0.0028                 | 0.441                              | 0.023                  | 0.0526                                | 0.0021                 | 0.650          | 371                                               | 16                    | 380                                               | 17                    | 313                                                  | 89                    | 150                         | 105                        | a                 |
| 0.0966                             | 0.0051                 | 0.772                              | 0.049                  | 0.0579                                | 0.0028                 | 0.755          | 581                                               | 28                    | 594                                               | 33                    | 527                                                  | 106                   | 230                         | 85                         | a                 |
| 0.195                              | 0.011                  | 2.19                               | 0.13                   | 0.0818                                | 0.0022                 | 0.910          | 1179                                              | 40                    | 1146                                              | 67                    | 1240                                                 | 54                    | 150                         | 100                        | a                 |
| 0.1256                             | 0.0064                 | 1.083                              | 0.060                  | 0.0625                                | 0.0021                 | 0.859          | 745                                               | 29                    | 763                                               | 37                    | 693                                                  | 71                    | 145                         | 100                        | a                 |
| 0.1089                             | 0.0059                 | 0.899                              | 0.053                  | 0.0599                                | 0.0017                 | 0.872          | 651                                               | 28                    | 666                                               | 38                    | 599                                                  | 62                    | 160                         | 145                        | a                 |
| 0.0734                             | 0.0036                 | 0.552                              | 0.030                  | 0.0545                                | 0.0020                 | 0.748          | 446                                               | 20                    | 456                                               | 22                    | 393                                                  | 82                    | 153                         | 105                        | a                 |
| 0.1805                             | 0.0098                 | 1.94                               | 0.11                   | 0.0780                                | 0.0021                 | 0.909          | 1095                                              | 38                    | 1070                                              | 53                    | 1147                                                 | 53                    | 180                         | 110                        | a                 |
| 0.195                              | 0.011                  | 2.19                               | 0.13                   | 0.0814                                | 0.0022                 | 0.913          | 1179                                              | 40                    | 1151                                              | 67                    | 1231                                                 | 53                    | 135                         | 90                         | a                 |
| 0.216                              | 0.012                  | 2.59                               | 0.15                   | 0.0867                                | 0.0024                 | 0.914          | 1297                                              | 43                    | 1263                                              | 64                    | 1354                                                 | 54                    | 160                         | 110                        | a                 |
| 0.199                              | 0.011                  | 2.26                               | 0.13                   | 0.0822                                | 0.0022                 | 0.915          | 1199                                              | 40                    | 1170                                              | 58                    | 1250                                                 | 51                    | 180                         | 125                        | a                 |
| 0.206                              | 0.011                  | 2.38                               | 0.15                   | 0.0837                                | 0.0031                 | 0.885          | 1235                                              | 45                    | 1207                                              | 73                    | 1285                                                 | 73                    | 160                         | 95                         | a                 |
| 0.0660                             | 0.0036                 | 0.491                              | 0.030                  | 0.0540                                | 0.0016                 | 0.801          | 406                                               | 21                    | 412                                               | 23                    | 371                                                  | 67                    | 130                         | 80                         | a                 |
| 0.253                              | 0.014                  | 3.33                               | 0.20                   | 0.0955                                | 0.0027                 | 0.923          | 1487                                              | 48                    | 1452                                              | 92                    | 1538                                                 | 53                    | 205                         | 130                        | a                 |
| 0.0687                             | 0.0033                 | 0.516                              | 0.027                  | 0.0545                                | 0.0016                 | 0.776          | 423                                               | 18                    | 428                                               | 21                    | 393                                                  | 68                    | 180                         | 100                        | a                 |
| 0.249                              | 0.014                  | 3.22                               | 0.20                   | 0.0939                                | 0.0028                 | 0.918          | 1462                                              | 48                    | 1433                                              | 91                    | 1506                                                 | 56                    | 255                         | 90                         | a                 |
| 0.1722                             | 0.0089                 | 1.779                              | 0.097                  | 0.0749                                | 0.0021                 | 0.901          | 1038                                              | 36                    | 1024                                              | 49                    | 1067                                                 | 56                    | 155                         | 125                        | a                 |
| 0.0542                             | 0.0026                 | 0.394                              | 0.021                  | 0.0527                                | 0.0019                 | 0.646          | 337                                               | 15                    | 340                                               | 16                    | 314                                                  | 81                    | 170                         | 110                        | a                 |
| 0.1616                             | 0.0083                 | 1.567                              | 0.087                  | 0.0704                                | 0.0023                 | 0.882          | 957                                               | 34                    | 965                                               | 46                    | 939                                                  | 66                    | 180                         | 95                         | a                 |
| 0.0473                             | 0.0021                 | 0.338                              | 0.016                  | 0.0518                                | 0.0015                 | 0.672          | 296                                               | 12                    | 298                                               | 13                    | 279                                                  | 65                    | 180                         | 80                         | a                 |
| 0.1776                             | 0.0092                 | 1.85                               | 0.10                   | 0.0754                                | 0.0020                 | 0.909          | 1062                                              | 36                    | 1054                                              | 50                    | 1078                                                 | 52                    | 220                         | 90                         | a                 |
| 0.225                              | 0.013                  | 2.66                               | 0.19                   | 0.0856                                | 0.0040                 | 0.870          | 1316                                              | 53                    | 1309                                              | 83                    | 1329                                                 | 91                    | 125                         | 90                         | a                 |
| 0.491                              | 0.048                  | 12.19                              | 1.25                   | 0.1799                                | 0.0051                 | 0.957          | 2619                                              | 96                    | 2577                                              | 209                   | 2652                                                 | 47                    | 105                         | 120                        | a                 |
| 0.198                              | 0.011                  | 2.15                               | 0.12                   | 0.0790                                | 0.0021                 | 0.918          | 1166                                              | 40                    | 1162                                              | 69                    | 1173                                                 | 52                    | 155                         | 100                        | a                 |
| 0.0862                             | 0.0040                 | 0.689                              | 0.034                  | 0.0580                                | 0.0016                 | 0.830          | 532                                               | 20                    | 533                                               | 24                    | 529                                                  | 59                    | 135                         | 145                        | a                 |
| 0.1786                             | 0.0093                 | 1.84                               | 0.10                   | 0.0747                                | 0.0020                 | 0.908          | 1060                                              | 36                    | 1060                                              | 51                    | 1062                                                 | 54                    | 180                         | 110                        | a                 |
| 0.1078                             | 0.0052                 | 0.915                              | 0.047                  | 0.0616                                | 0.0017                 | 0.862          | 660                                               | 25                    | 660                                               | 30                    | 659                                                  | 58                    | 126                         | 125                        | a                 |
| 0.234                              | 0.014                  | 2.80                               | 0.18                   | 0.0868                                | 0.0024                 | 0.929          | 1357                                              | 48                    | 1356                                              | 90                    | 1357                                                 | 53                    | 200                         | 90                         | a                 |
| 0.0819                             | 0.0039                 | 0.649                              | 0.034                  | 0.0574                                | 0.0017                 | 0.811          | 508                                               | 21                    | 508                                               | 25                    | 508                                                  | 64                    | 220                         | 120                        | a                 |
| 0.234                              | 0.013                  | 2.80                               | 0.17                   | 0.0867                                | 0.0024                 | 0.922          | 1355                                              | 45                    | 1355                                              | 69                    | 1354                                                 | 54                    | 175                         | 110                        | a                 |
| 0.001325                           | 0.000084               | 0.0085                             | 0.0026                 | 0.046                                 | 0.021                  | *              | 9                                                 | 3                     | 9                                                 | 1                     | 16                                                   | 1103                  | 135                         | 90                         | a                 |
| 0.1673                             | 0.0087                 | 1.682                              | 0.097                  | 0.0729                                | 0.0024                 | 0.881          | 1002                                              | 37                    | 997                                               | 48                    | 1011                                                 | 67                    | 275                         | 115                        | a                 |
| 0.1818                             | 0.0099                 | 1.87                               | 0.11                   | 0.0745                                | 0.0025                 | 0.894          | 1069                                              | 39                    | 1077                                              | 54                    | 1054                                                 | 67                    | 150                         | 100                        | a                 |

| $^{206}\text{Pb}^*/^{238}\text{U}$ | $\pm 2\sigma$<br>(abs) | $^{207}\text{Pb}^*/^{235}\text{U}$ | $\pm 2\sigma$<br>(abs) | $^{207}\text{Pb}^*/^{206}\text{Pb}^*$ | $\pm 2\sigma$<br>(abs) | corr.<br>coef. | $^{206}\text{Pb}^*/^{238}\text{U}$<br>age<br>(Ma) | $\pm 2\sigma$<br>(Ma) | $^{207}\text{Pb}^*/^{235}\text{U}$<br>age<br>(Ma) | $\pm 2\sigma$<br>(Ma) | $^{207}\text{Pb}^*/^{206}\text{Pb}^*$<br>age<br>(Ma) | $\pm 2\sigma$<br>(Ma) | Length<br>( $\mu\text{m}$ ) | Width<br>( $\mu\text{m}$ ) | Accept/<br>Reject |
|------------------------------------|------------------------|------------------------------------|------------------------|---------------------------------------|------------------------|----------------|---------------------------------------------------|-----------------------|---------------------------------------------------|-----------------------|------------------------------------------------------|-----------------------|-----------------------------|----------------------------|-------------------|
| 0.188                              | 0.010                  | 1.96                               | 0.11                   | 0.0756                                | 0.0020                 | 0.919          | 1102                                              | 39                    | 1111                                              | 56                    | 1084                                                 | 53                    | 190                         | 145                        | a                 |
| 0.0728                             | 0.0040                 | 0.568                              | 0.032                  | 0.0565                                | 0.0015                 | 0.831          | 456                                               | 21                    | 453                                               | 24                    | 473                                                  | 59                    | 165                         | 115                        | a                 |
| 0.191                              | 0.010                  | 1.99                               | 0.11                   | 0.0759                                | 0.0020                 | 0.917          | 1113                                              | 39                    | 1125                                              | 56                    | 1091                                                 | 53                    | 200                         | 90                         | a                 |
| 0.0483                             | 0.0023                 | 0.353                              | 0.018                  | 0.0530                                | 0.0016                 | 0.663          | 307                                               | 14                    | 304                                               | 14                    | 328                                                  | 71                    | 195                         | 130                        | a                 |
| 0.193                              | 0.010                  | 2.02                               | 0.11                   | 0.0760                                | 0.0020                 | 0.918          | 1124                                              | 38                    | 1139                                              | 56                    | 1096                                                 | 53                    | 170                         | 120                        | a                 |
| 0.0509                             | 0.0024                 | 0.375                              | 0.022                  | 0.0535                                | 0.0027                 | 0.903          | 323                                               | 16                    | 320                                               | 16                    | 349                                                  | 114                   | 140                         | 100                        | a                 |
| 0.1667                             | 0.0097                 | 1.69                               | 0.10                   | 0.0736                                | 0.0020                 | 0.911          | 1005                                              | 39                    | 994                                               | 54                    | 1029                                                 | 56                    | 155                         | 115                        | a                 |
| 0.0549                             | 0.0025                 | 0.410                              | 0.020                  | 0.0541                                | 0.0016                 | 0.712          | 349                                               | 15                    | 345                                               | 15                    | 376                                                  | 65                    | 175                         | 95                         | a                 |
| 0.1740                             | 0.0091                 | 1.730                              | 0.098                  | 0.0721                                | 0.0023                 | 0.891          | 1020                                              | 37                    | 1034                                              | 58                    | 990                                                  | 65                    | 270                         | 85                         | a                 |
| 0.379                              | 0.026                  | 6.14                               | 0.45                   | 0.1175                                | 0.0036                 | 0.943          | 1996                                              | 64                    | 2071                                              | 123                   | 1919                                                 | 55                    | 155                         | 100                        | a                 |
| 0.226                              | 0.013                  | 2.56                               | 0.16                   | 0.0819                                | 0.0023                 | 0.926          | 1288                                              | 46                    | 1315                                              | 85                    | 1244                                                 | 56                    | 150                         | 120                        | a                 |
| 0.1006                             | 0.0047                 | 0.855                              | 0.043                  | 0.0617                                | 0.0019                 | 0.825          | 627                                               | 24                    | 618                                               | 28                    | 662                                                  | 66                    | 155                         | 115                        | a                 |
| 0.0576                             | 0.0027                 | 0.436                              | 0.022                  | 0.0548                                | 0.0016                 | 0.731          | 367                                               | 16                    | 361                                               | 17                    | 404                                                  | 65                    | 110                         | 115                        | a                 |
| 0.216                              | 0.012                  | 2.36                               | 0.14                   | 0.0792                                | 0.0021                 | 0.924          | 1229                                              | 42                    | 1260                                              | 63                    | 1177                                                 | 53                    | 175                         | 135                        | a                 |
| 0.0984                             | 0.0047                 | 0.834                              | 0.044                  | 0.0615                                | 0.0019                 | 0.819          | 616                                               | 24                    | 605                                               | 27                    | 656                                                  | 67                    | 180                         | 110                        | a                 |
| 0.0455                             | 0.0022                 | 0.333                              | 0.019                  | 0.0531                                | 0.0027                 | 0.888          | 292                                               | 15                    | 287                                               | 14                    | 334                                                  | 114                   | 175                         | 90                         | a                 |
| 0.203                              | 0.011                  | 2.14                               | 0.12                   | 0.0764                                | 0.0021                 | 0.921          | 1162                                              | 40                    | 1193                                              | 71                    | 1106                                                 | 54                    | 225                         | 90                         | a                 |
| 0.217                              | 0.013                  | 2.36                               | 0.15                   | 0.0789                                | 0.0024                 | 0.920          | 1231                                              | 45                    | 1266                                              | 80                    | 1170                                                 | 60                    | 165                         | 110                        | a                 |
| 0.206                              | 0.012                  | 2.17                               | 0.13                   | 0.0765                                | 0.0022                 | 0.920          | 1172                                              | 42                    | 1208                                              | 62                    | 1107                                                 | 57                    | 135                         | 80                         | a                 |
| 0.248                              | 0.015                  | 2.87                               | 0.18                   | 0.0838                                | 0.0026                 | 0.924          | 1374                                              | 48                    | 1430                                              | 75                    | 1289                                                 | 61                    | 95                          | 95                         | a                 |
| 0.204                              | 0.011                  | 2.13                               | 0.13                   | 0.0757                                | 0.0031                 | 0.882          | 1157                                              | 43                    | 1195                                              | 60                    | 1087                                                 | 82                    | 245                         | 95                         | a                 |
| 0.1549                             | 0.0078                 | 1.548                              | 0.082                  | 0.0725                                | 0.0019                 | 0.896          | 950                                               | 33                    | 928                                               | 44                    | 1000                                                 | 53                    | 190                         | 120                        | a                 |
| 0.0423                             | 0.0020                 | 0.310                              | 0.015                  | 0.0531                                | 0.0018                 | 0.534          | 274                                               | 12                    | 267                                               | 12                    | 334                                                  | 76                    | 245                         | 135                        | a                 |
| 0.274                              | 0.016                  | 3.28                               | 0.20                   | 0.0867                                | 0.0023                 | 0.940          | 1476                                              | 48                    | 1563                                              | 102                   | 1355                                                 | 51                    | 220                         | 115                        | a                 |
| 0.192                              | 0.011                  | 1.91                               | 0.12                   | 0.0721                                | 0.0022                 | 0.910          | 1084                                              | 41                    | 1132                                              | 68                    | 989                                                  | 63                    | 110                         | 85                         | a                 |
| 0.0267                             | 0.0012                 | 0.189                              | 0.013                  | 0.0513                                | 0.0049                 | 0.705          | 175                                               | 11                    | 170                                               | 8                     | 254                                                  | 218                   | 160                         | 150                        | a                 |
| 0.256                              | 0.015                  | 2.87                               | 0.18                   | 0.0814                                | 0.0022                 | 0.937          | 1374                                              | 47                    | 1467                                              | 95                    | 1232                                                 | 54                    | 250                         | 130                        | a                 |
| 0.1591                             | 0.0081                 | 1.641                              | 0.088                  | 0.0748                                | 0.0020                 | 0.897          | 986                                               | 34                    | 952                                               | 52                    | 1063                                                 | 53                    | 170                         | 130                        | a                 |
| 0.245                              | 0.016                  | 2.68                               | 0.19                   | 0.0794                                | 0.0026                 | 0.929          | 1324                                              | 51                    | 1412                                              | 82                    | 1183                                                 | 65                    | 165                         | 80                         | a                 |
| 0.211                              | 0.012                  | 2.16                               | 0.13                   | 0.0743                                | 0.0020                 | 0.926          | 1168                                              | 41                    | 1233                                              | 62                    | 1049                                                 | 55                    | 140                         | 105                        | a                 |
| 0.205                              | 0.012                  | 2.07                               | 0.13                   | 0.0734                                | 0.0024                 | 0.911          | 1140                                              | 42                    | 1202                                              | 63                    | 1025                                                 | 67                    | 106                         | 90                         | a                 |
| 0.1507                             | 0.0076                 | 1.522                              | 0.081                  | 0.0732                                | 0.0019                 | 0.892          | 939                                               | 33                    | 905                                               | 43                    | 1020                                                 | 53                    | 130                         | 85                         | a                 |
| 0.231                              | 0.014                  | 2.46                               | 0.15                   | 0.0771                                | 0.0020                 | 0.936          | 1260                                              | 45                    | 1342                                              | 72                    | 1123                                                 | 53                    | 120                         | 105                        | a                 |
| 0.1597                             | 0.0081                 | 1.657                              | 0.090                  | 0.0752                                | 0.0022                 | 0.885          | 992                                               | 34                    | 955                                               | 45                    | 1074                                                 | 58                    | 210                         | 125                        | a                 |
| 0.256                              | 0.015                  | 2.84                               | 0.18                   | 0.0803                                | 0.0023                 | 0.936          | 1366                                              | 47                    | 1472                                              | 95                    | 1205                                                 | 55                    | 125                         | 100                        | a                 |
| 0.1505                             | 0.0076                 | 1.527                              | 0.082                  | 0.0736                                | 0.0022                 | 0.875          | 941                                               | 33                    | 904                                               | 42                    | 1029                                                 | 61                    | 180                         | 160                        | a                 |
| 0.190                              | 0.011                  | 1.85                               | 0.12                   | 0.0705                                | 0.0036                 | 0.857          | 1064                                              | 44                    | 1124                                              | 58                    | 944                                                  | 104                   | 155                         | 125                        | a                 |
| 0.0622                             | 0.0030                 | 0.490                              | 0.034                  | 0.0572                                | 0.0045                 | 0.896          | 405                                               | 23                    | 389                                               | 19                    | 499                                                  | 172                   | 270                         | 120                        | a                 |
| 0.304                              | 0.019                  | 3.53                               | 0.23                   | 0.0843                                | 0.0025                 | 0.943          | 1534                                              | 52                    | 1710                                              | 93                    | 1300                                                 | 58                    | 105                         | 60                         | a                 |
| 0.226                              | 0.013                  | 2.33                               | 0.15                   | 0.0747                                | 0.0022                 | 0.930          | 1222                                              | 45                    | 1316                                              | 84                    | 1061                                                 | 59                    | 155                         | 100                        | a                 |
| 0.0788                             | 0.0037                 | 0.660                              | 0.035                  | 0.0608                                | 0.0022                 | 0.734          | 515                                               | 21                    | 489                                               | 22                    | 632                                                  | 77                    | 130                         | 135                        | a                 |
| 0.273                              | 0.016                  | 2.90                               | 0.19                   | 0.0770                                | 0.0026                 | 0.932          | 1382                                              | 50                    | 1557                                              | 82                    | 1121                                                 | 68                    | 160                         | 120                        | a                 |
| 0.362                              | 0.024                  | 4.04                               | 0.30                   | 0.0808                                | 0.0026                 | 0.954          | 1641                                              | 60                    | 1992                                              | 153                   | 1218                                                 | 64                    | 120                         | 70                         | a                 |
| 0.1603                             | 0.0084                 | 1.716                              | 0.094                  | 0.0776                                | 0.0021                 | 0.895          | 1014                                              | 35                    | 959                                               | 46                    | 1137                                                 | 53                    | 170                         | 160                        | a                 |
| 0.309                              | 0.021                  | 3.31                               | 0.24                   | 0.0778                                | 0.0022                 | 0.955          | 1484                                              | 57                    | 1735                                              | 105                   | 1142                                                 | 57                    | 105                         | 145                        | a                 |
| 0.1634                             | 0.0083                 | 1.770                              | 0.095                  | 0.0786                                | 0.0021                 | 0.894          | 1034                                              | 35                    | 976                                               | 46                    | 1161                                                 | 53                    | 210                         | 135                        | a                 |
| 0.1603                             | 0.0081                 | 1.721                              | 0.092                  | 0.0779                                | 0.0022                 | 0.885          | 1017                                              | 34                    | 958                                               | 45                    | 1144                                                 | 56                    | 175                         | 140                        | a                 |
| 0.1178                             | 0.0061                 | 1.122                              | 0.063                  | 0.0691                                | 0.0019                 | 0.863          | 764                                               | 30                    | 718                                               | 39                    | 902                                                  | 57                    | 150                         | 100                        | a                 |
| 0.195                              | 0.011                  | 1.80                               | 0.17                   | 0.0673                                | 0.0079                 | 0.665          | 1047                                              | 63                    | 1146                                              | 58                    | 846                                                  | 245                   | 180                         | 100                        | a                 |
| 0.1805                             | 0.0099                 | 1.621                              | 0.094                  | 0.0651                                | 0.0018                 | 0.921          | 978                                               | 36                    | 1069                                              | 54                    | 779                                                  | 59                    | 115                         | 80                         | a                 |
| 0.1489                             | 0.0075                 | 1.574                              | 0.087                  | 0.0767                                | 0.0029                 | 0.836          | 960                                               | 34                    | 895                                               | 42                    | 1112                                                 | 75                    | 175                         | 125                        | a                 |

| $^{206}\text{Pb}^*/^{238}\text{U}$                    | $\pm 2\sigma$<br>(abs) | $^{207}\text{Pb}^*/^{235}\text{U}$ | $\pm 2\sigma$<br>(abs) | $^{207}\text{Pb}^*/^{206}\text{Pb}^*$ | $\pm 2\sigma$<br>(abs) | corr.<br>coef. | $^{206}\text{Pb}^*/^{238}\text{U}$<br>age<br>(Ma) | $\pm 2\sigma$<br>(Ma) | $^{207}\text{Pb}^*/^{235}\text{U}$<br>age<br>(Ma) | $\pm 2\sigma$<br>(Ma) | $^{207}\text{Pb}^*/^{206}\text{Pb}^*$<br>age<br>(Ma) | $\pm 2\sigma$<br>(Ma) | Length<br>( $\mu\text{m}$ ) | Width<br>( $\mu\text{m}$ ) | Accept/<br>Reject |
|-------------------------------------------------------|------------------------|------------------------------------|------------------------|---------------------------------------|------------------------|----------------|---------------------------------------------------|-----------------------|---------------------------------------------------|-----------------------|------------------------------------------------------|-----------------------|-----------------------------|----------------------------|-------------------|
| 0.151                                                 | 0.010                  | 1.61                               | 0.11                   | 0.0772                                | 0.0022                 | 0.909          | 974                                               | 44                    | 908                                               | 57                    | 1127                                                 | 56                    | 180                         | 90                         | a                 |
| 0.00408                                               | 0.00019                | 0.0282                             | 0.0017                 | 0.0501                                | 0.0035                 | *              | 28                                                | 2                     | 26                                                | 1                     | 200                                                  | 161                   | 210                         | 125                        | a                 |
| 0.0730                                                | 0.0036                 | 0.619                              | 0.038                  | 0.0615                                | 0.0033                 | 0.557          | 489                                               | 24                    | 454                                               | 23                    | 658                                                  | 113                   | 110                         | 105                        | a                 |
| 0.0462                                                | 0.0021                 | 0.368                              | 0.022                  | 0.0578                                | 0.0031                 | 0.885          | 318                                               | 16                    | 291                                               | 13                    | 523                                                  | 118                   | 195                         | 150                        | a                 |
| 0.0269                                                | 0.0012                 | 0.206                              | 0.016                  | 0.0556                                | 0.0062                 | 0.691          | 190                                               | 14                    | 171                                               | 8                     | 437                                                  | 250                   | 180                         | 135                        | a                 |
| 0.01411                                               | 0.00082                | 0.104                              | 0.012                  | 0.054                                 | 0.010                  | 0.267          | 101                                               | 11                    | 90                                                | 5                     | 355                                                  | 425                   | 205                         | 160                        | a                 |
| 0.187                                                 | 0.010                  | 1.508                              | 0.090                  | 0.0586                                | 0.0017                 | 0.930          | 933                                               | 36                    | 1104                                              | 66                    | 551                                                  | 62                    | 100                         | 95                         | a                 |
| 0.0479                                                | 0.0023                 | 0.402                              | 0.030                  | 0.0609                                | 0.0049                 | 0.866          | 343                                               | 21                    | 301                                               | 15                    | 636                                                  | 174                   | 125                         | 90                         | a                 |
| 0.0641                                                | 0.0033                 | 0.570                              | 0.053                  | 0.0645                                | 0.0078                 | 0.882          | 458                                               | 34                    | 400                                               | 21                    | 759                                                  | 255                   | 280                         | 140                        | a                 |
| 0.0392                                                | 0.0018                 | 0.341                              | 0.023                  | 0.0631                                | 0.0051                 | 0.822          | 298                                               | 17                    | 248                                               | 11                    | 713                                                  | 172                   | 200                         | 140                        | a                 |
| 0.0391                                                | 0.0018                 | 0.341                              | 0.035                  | 0.063                                 | 0.010                  | 0.772          | 298                                               | 26                    | 247                                               | 11                    | 717                                                  | 336                   | 190                         | 105                        | a                 |
| 0.0388                                                | 0.0018                 | 0.347                              | 0.026                  | 0.0649                                | 0.0065                 | 0.804          | 302                                               | 20                    | 245                                               | 11                    | 770                                                  | 210                   | 160                         | 95                         | a                 |
| 0.00790                                               | 0.00043                | 0.064                              | 0.014                  | 0.059                                 | 0.023                  | *              | 63                                                | 14                    | 51                                                | 3                     | 553                                                  | 842                   | 175                         | 100                        | a                 |
| 0.1632                                                | 0.0087                 | 2.40                               | 0.24                   | 0.107                                 | 0.015                  | 0.950          | 1242                                              | 72                    | 974                                               | 48                    | 1743                                                 | 258                   | 190                         | 115                        | a                 |
| 0.0783                                                | 0.0045                 | 0.843                              | 0.090                  | 0.078                                 | 0.011                  | 0.900          | 621                                               | 49                    | 486                                               | 27                    | 1148                                                 | 286                   | 115                         | 100                        | a                 |
| 0.1168                                                | 0.0059                 | 1.493                              | 0.082                  | 0.0928                                | 0.0025                 | 0.820          | 928                                               | 33                    | 712                                               | 38                    | 1483                                                 | 51                    | 160                         | 95                         | r                 |
| 0.01296                                               | 0.00061                | 0.116                              | 0.011                  | 0.0652                                | 0.0087                 | 0.289          | 112                                               | 10                    | 83                                                | 4                     | 781                                                  | 282                   | 220                         | 120                        | r                 |
| 0.0430                                                | 0.0023                 | 0.502                              | 0.065                  | 0.085                                 | 0.017                  | 0.792          | 413                                               | 44                    | 271                                               | 14                    | 1306                                                 | 391                   | 152                         | 140                        | r                 |
| 0.00928                                               | 0.00045                | 0.0937                             | 0.0095                 | 0.073                                 | 0.011                  | *              | 91                                                | 9                     | 60                                                | 3                     | 1020                                                 | 304                   | 210                         | 85                         | r                 |
| 0.0380                                                | 0.0018                 | 0.485                              | 0.034                  | 0.0926                                | 0.0079                 | 0.816          | 401                                               | 23                    | 240                                               | 11                    | 1479                                                 | 162                   | 180                         | 115                        | r                 |
| 0.00302                                               | 0.00016                | 0.0350                             | 0.0070                 | 0.084                                 | 0.031                  | *              | 35                                                | 7                     | 19                                                | 1                     | 1296                                                 | 715                   | 245                         | 120                        | r                 |
| 0.00209                                               | 0.00029                | 0.025                              | 0.023                  | 0.09                                  | 0.14                   | *              | 25                                                | 23                    | 13                                                | 2                     | 1334                                                 | 3115                  | 205                         | 100                        | r                 |
| 0.00213                                               | 0.00013                | 0.0265                             | 0.0060                 | 0.090                                 | 0.037                  | *              | 27                                                | 6                     | 14                                                | 1                     | 1428                                                 | 784                   | 165                         | 115                        | r                 |
| 0.01495                                               | 0.00085                | 0.210                              | 0.033                  | 0.102                                 | 0.026                  | 0.296          | 194                                               | 27                    | 96                                                | 5                     | 1659                                                 | 477                   | 165                         | 110                        | r                 |
| 0.132                                                 | 0.010                  | 6.18                               | 0.59                   | 0.339                                 | 0.019                  | 0.973          | 2002                                              | 83                    | 800                                               | 57                    | 3659                                                 | 88                    | 80                          | 85                         | r                 |
| 0.0934                                                | 0.0061                 | 3.48                               | 0.30                   | 0.271                                 | 0.018                  | 0.950          | 1523                                              | 68                    | 575                                               | 36                    | 3309                                                 | 107                   | 170                         | 75                         | r                 |
| 0.00                                                  | 0.00                   | 0.015                              | 0.020                  | 0.28                                  | 0.43                   | *              | 15                                                | 20                    | 2                                                 | 1                     | 3364                                                 | 2387                  | 175                         | 110                        | r                 |
| 0.0084                                                | 0.0019                 | 0.46                               | 0.30                   | 0.39                                  | 0.42                   | *              | 383                                               | 211                   | 54                                                | 12                    | 3890                                                 | 1598                  | 70                          | 60                         | r                 |
| <b>12. Amazon River, Brazil (3.2162°S, 59.2255°W)</b> |                        |                                    |                        |                                       |                        |                |                                                   |                       |                                                   |                       |                                                      |                       |                             |                            |                   |
| 0.00966                                               | 0.00048                | 0.0389                             | 0.0077                 | 0.0292                                | 0.0036                 |                | 39                                                | 8                     | 62                                                | 3                     |                                                      |                       | 113                         | 92                         | r                 |
| 0.230                                                 | 0.012                  | 5.39                               | 0.34                   | 0.1703                                | 0.0046                 | 0.847          | 1883                                              | 54                    | 1332                                              | 64                    | 2561                                                 | 45                    | 130                         | 80                         | r                 |
| 0.1766                                                | 0.0093                 | 2.79                               | 0.17                   | 0.1144                                | 0.0033                 | 0.855          | 1352                                              | 46                    | 1049                                              | 51                    | 1870                                                 | 52                    | 175                         | 75                         | a                 |
| 0.175                                                 | 0.017                  | 2.60                               | 0.39                   | 0.108                                 | 0.010                  | 0.747          | 1301                                              | 110                   | 1039                                              | 93                    | 1762                                                 | 170                   | 135                         | 45                         | a                 |
| 0.236                                                 | 0.012                  | 4.55                               | 0.29                   | 0.1401                                | 0.0040                 | 0.870          | 1741                                              | 52                    | 1365                                              | 65                    | 2228                                                 | 49                    | 110                         | 75                         | a                 |
| 0.203                                                 | 0.010                  | 3.02                               | 0.25                   | 0.1079                                | 0.0061                 | 0.749          | 1413                                              | 63                    | 1191                                              | 55                    | 1765                                                 | 103                   | 140                         | 95                         | a                 |
| 0.233                                                 | 0.012                  | 3.81                               | 0.23                   | 0.1186                                | 0.0032                 | 0.889          | 1595                                              | 48                    | 1350                                              | 62                    | 1935                                                 | 49                    | 125                         | 95                         | a                 |
| 0.248                                                 | 0.013                  | 4.34                               | 0.26                   | 0.1268                                | 0.0033                 | 0.893          | 1701                                              | 49                    | 1430                                              | 65                    | 2054                                                 | 46                    | 100                         | 85                         | a                 |
| 0.223                                                 | 0.011                  | 3.33                               | 0.20                   | 0.1081                                | 0.0033                 | 0.875          | 1487                                              | 48                    | 1298                                              | 57                    | 1768                                                 | 56                    | 130                         | 100                        | a                 |
| 0.201                                                 | 0.014                  | 2.73                               | 0.21                   | 0.0983                                | 0.0027                 | 0.919          | 1335                                              | 57                    | 1181                                              | 74                    | 1592                                                 | 51                    | 110                         | 95                         | a                 |
| 0.216                                                 | 0.011                  | 3.09                               | 0.19                   | 0.1039                                | 0.0031                 | 0.882          | 1429                                              | 48                    | 1258                                              | 58                    | 1695                                                 | 55                    | 115                         | 70                         | a                 |
| 0.1681                                                | 0.0099                 | 1.97                               | 0.14                   | 0.0850                                | 0.0030                 | 0.875          | 1105                                              | 48                    | 1002                                              | 55                    | 1314                                                 | 68                    | 80                          | 85                         | a                 |
| 0.0438                                                | 0.0023                 | 0.278                              | 0.031                  | 0.0461                                | 0.0042                 | 0.890          | 249                                               | 24                    | 276                                               | 14                    | 0                                                    | 218                   | 90                          | 95                         | a                 |
| 0.200                                                 | 0.011                  | 2.64                               | 0.17                   | 0.0956                                | 0.0027                 | 0.900          | 1311                                              | 47                    | 1176                                              | 60                    | 1540                                                 | 53                    | 180                         | 70                         | a                 |
| 0.362                                                 | 0.020                  | 9.50                               | 0.63                   | 0.1902                                | 0.0050                 | 0.900          | 2387                                              | 61                    | 1993                                              | 96                    | 2744                                                 | 44                    | 220                         | 85                         | a                 |
| 0.254                                                 | 0.013                  | 4.13                               | 0.25                   | 0.1178                                | 0.0031                 | 0.902          | 1660                                              | 49                    | 1461                                              | 66                    | 1922                                                 | 47                    | 145                         | 115                        | a                 |
| 0.215                                                 | 0.011                  | 2.92                               | 0.22                   | 0.0988                                | 0.0042                 | 0.849          | 1388                                              | 56                    | 1253                                              | 61                    | 1601                                                 | 79                    | 145                         | 65                         | a                 |
| 0.1112                                                | 0.0057                 | 0.864                              | 0.053                  | 0.0564                                | 0.0018                 | 0.866          | 632                                               | 29                    | 679                                               | 33                    | 468                                                  | 69                    | 115                         | 75                         | a                 |
| 0.260                                                 | 0.013                  | 4.09                               | 0.24                   | 0.1142                                | 0.0030                 | 0.906          | 1652                                              | 48                    | 1488                                              | 67                    | 1867                                                 | 47                    | 120                         | 70                         | a                 |
| 0.1703                                                | 0.0085                 | 1.55                               | 0.25                   | 0.0659                                | 0.0080                 |                | 950                                               | 101                   | 1014                                              | 47                    | 804                                                  | 254                   | 150                         | 63                         | a                 |
| 0.273                                                 | 0.014                  | 4.43                               | 0.27                   | 0.1176                                | 0.0031                 | 0.909          | 1718                                              | 50                    | 1557                                              | 71                    | 1920                                                 | 48                    | 120                         | 85                         | a                 |
| 0.234                                                 | 0.012                  | 2.52                               | 0.22                   | 0.0779                                | 0.0049                 |                | 1277                                              | 64                    | 1358                                              | 62                    | 1144                                                 | 125                   | 123                         | 53                         | a                 |

| $^{206}\text{Pb}^*/^{238}\text{U}$ | $\pm 2\sigma$<br>(abs) | $^{207}\text{Pb}^*/^{235}\text{U}$ | $\pm 2\sigma$<br>(abs) | $^{207}\text{Pb}^*/^{206}\text{Pb}^*$ | $\pm 2\sigma$<br>(abs) | corr.<br>coef. | $^{206}\text{Pb}^*/^{238}\text{U}$<br>age<br>(Ma) | $\pm 2\sigma$<br>(Ma) | $^{207}\text{Pb}^*/^{235}\text{U}$<br>age<br>(Ma) | $\pm 2\sigma$<br>(Ma) | $^{207}\text{Pb}^*/^{206}\text{Pb}^*$<br>age<br>(Ma) | $\pm 2\sigma$<br>(Ma) | Length<br>( $\mu\text{m}$ ) | Width<br>( $\mu\text{m}$ ) | Accept/<br>Reject |
|------------------------------------|------------------------|------------------------------------|------------------------|---------------------------------------|------------------------|----------------|---------------------------------------------------|-----------------------|---------------------------------------------------|-----------------------|------------------------------------------------------|-----------------------|-----------------------------|----------------------------|-------------------|
| 0.224                              | 0.011                  | 3.01                               | 0.22                   | 0.0974                                | 0.0044                 | 0.839          | 1409                                              | 55                    | 1303                                              | 59                    | 1574                                                 | 84                    | 145                         | 110                        | a                 |
| 0.1781                             | 0.0083                 | 2.02                               | 0.11                   | 0.0824                                | 0.0022                 | 0.890          | 1123                                              | 37                    | 1057                                              | 46                    | 1254                                                 | 52                    | 125                         | 90                         | a                 |
| 0.1287                             | 0.0080                 | 1.071                              | 0.081                  | 0.0603                                | 0.0022                 | 0.880          | 739                                               | 40                    | 780                                               | 46                    | 616                                                  | 80                    | 100                         | 75                         | a                 |
| 0.200                              | 0.010                  | 2.43                               | 0.15                   | 0.0882                                | 0.0026                 | 0.896          | 1253                                              | 45                    | 1176                                              | 56                    | 1387                                                 | 57                    | 115                         | 65                         | a                 |
| 0.231                              | 0.011                  | 3.12                               | 0.18                   | 0.0980                                | 0.0027                 | 0.903          | 1437                                              | 45                    | 1338                                              | 60                    | 1587                                                 | 51                    | 160                         | 75                         | a                 |
| 0.0936                             | 0.0047                 | 0.719                              | 0.049                  | 0.0557                                | 0.0026                 |                | 550                                               | 29                    | 577                                               | 28                    | 440                                                  | 105                   | 129                         | 76                         | a                 |
| 0.227                              | 0.011                  | 2.99                               | 0.18                   | 0.0953                                | 0.0026                 | 0.907          | 1404                                              | 45                    | 1320                                              | 60                    | 1535                                                 | 51                    | 120                         | 90                         | a                 |
| 0.233                              | 0.013                  | 3.13                               | 0.20                   | 0.0973                                | 0.0027                 | 0.914          | 1441                                              | 49                    | 1353                                              | 68                    | 1573                                                 | 52                    | 130                         | 65                         | a                 |
| 0.201                              | 0.012                  | 2.41                               | 0.16                   | 0.0869                                | 0.0024                 | 0.916          | 1245                                              | 48                    | 1181                                              | 63                    | 1358                                                 | 52                    | 95                          | 90                         | a                 |
| 0.1853                             | 0.0088                 | 2.10                               | 0.12                   | 0.0823                                | 0.0023                 | 0.892          | 1150                                              | 39                    | 1096                                              | 48                    | 1252                                                 | 54                    | 115                         | 90                         | a                 |
| 0.1715                             | 0.0097                 | 1.83                               | 0.12                   | 0.0772                                | 0.0021                 | 0.909          | 1055                                              | 42                    | 1020                                              | 53                    | 1127                                                 | 54                    | 125                         | 110                        | a                 |
| 0.1993                             | 0.0100                 | 2.06                               | 0.13                   | 0.0749                                | 0.0034                 |                | 1135                                              | 43                    | 1171                                              | 54                    | 1067                                                 | 91                    | 170                         | 99                         | a                 |
| 0.259                              | 0.014                  | 3.65                               | 0.23                   | 0.1021                                | 0.0028                 | 0.915          | 1561                                              | 50                    | 1486                                              | 70                    | 1663                                                 | 51                    | 100                         | 90                         | a                 |
| 0.1040                             | 0.0050                 | 0.841                              | 0.071                  | 0.0586                                | 0.0037                 | 0.657          | 620                                               | 39                    | 638                                               | 29                    | 554                                                  | 139                   | 150                         | 90                         | a                 |
| 0.1909                             | 0.0094                 | 2.14                               | 0.12                   | 0.0814                                | 0.0022                 | 0.901          | 1162                                              | 40                    | 1126                                              | 51                    | 1230                                                 | 54                    | 160                         | 100                        | a                 |
| 0.302                              | 0.019                  | 4.81                               | 0.34                   | 0.1154                                | 0.0031                 | 0.931          | 1787                                              | 59                    | 1703                                              | 92                    | 1886                                                 | 49                    | 90                          | 80                         | a                 |
| 0.0407                             | 0.0019                 | 0.280                              | 0.024                  | 0.0500                                | 0.0033                 | 0.890          | 251                                               | 19                    | 257                                               | 12                    | 194                                                  | 151                   | 155                         | 80                         | a                 |
| 0.1777                             | 0.0096                 | 1.90                               | 0.16                   | 0.0776                                | 0.0044                 | 0.806          | 1082                                              | 55                    | 1054                                              | 53                    | 1137                                                 | 113                   | 90                          | 90                         | a                 |
| 0.1758                             | 0.0086                 | 1.86                               | 0.11                   | 0.0768                                | 0.0020                 | 0.899          | 1067                                              | 38                    | 1044                                              | 47                    | 1115                                                 | 53                    | 130                         | 80                         | a                 |
| 0.1058                             | 0.0049                 | 0.872                              | 0.049                  | 0.0598                                | 0.0017                 | 0.845          | 637                                               | 26                    | 648                                               | 28                    | 596                                                  | 63                    | 120                         | 70                         | a                 |
| 0.1886                             | 0.0090                 | 2.06                               | 0.12                   | 0.0794                                | 0.0021                 | 0.901          | 1137                                              | 39                    | 1114                                              | 49                    | 1181                                                 | 53                    | 140                         | 65                         | a                 |
| 0.1726                             | 0.0086                 | 1.79                               | 0.11                   | 0.0754                                | 0.0026                 | 0.873          | 1043                                              | 41                    | 1026                                              | 47                    | 1079                                                 | 69                    | 110                         | 75                         | a                 |
| 0.1874                             | 0.0094                 | 1.93                               | 0.12                   | 0.0749                                | 0.0033                 |                | 1093                                              | 41                    | 1107                                              | 51                    | 1066                                                 | 88                    | 108                         | 98                         | a                 |
| 0.1942                             | 0.0094                 | 2.12                               | 0.12                   | 0.0793                                | 0.0021                 | 0.904          | 1157                                              | 39                    | 1144                                              | 51                    | 1180                                                 | 54                    | 110                         | 85                         | a                 |
| 0.1774                             | 0.0085                 | 1.85                               | 0.11                   | 0.0754                                | 0.0024                 | 0.880          | 1062                                              | 40                    | 1053                                              | 46                    | 1080                                                 | 64                    | 110                         | 80                         | a                 |
| 0.1395                             | 0.0070                 | 1.28                               | 0.19                   | 0.0666                                | 0.0072                 |                | 837                                               | 83                    | 842                                               | 40                    | 824                                                  | 225                   | 144                         | 82                         | a                 |
| 0.209                              | 0.010                  | 2.31                               | 0.13                   | 0.0802                                | 0.0033                 |                | 1214                                              | 41                    | 1221                                              | 56                    | 1202                                                 | 80                    | 109                         | 78                         | a                 |
| 0.0912                             | 0.0046                 | 0.735                              | 0.045                  | 0.0585                                | 0.0024                 |                | 560                                               | 26                    | 562                                               | 27                    | 549                                                  | 91                    | 100                         | 64                         | a                 |
| 0.336                              | 0.020                  | 5.36                               | 0.38                   | 0.1158                                | 0.0033                 | 0.931          | 1878                                              | 60                    | 1865                                              | 95                    | 1892                                                 | 52                    | 125                         | 70                         | a                 |
| 0.0355                             | 0.0017                 | 0.248                              | 0.015                  | 0.0506                                | 0.0018                 | 0.902          | 225                                               | 12                    | 225                                               | 10                    | 225                                                  | 83                    | 160                         | 85                         | a                 |
| 0.0411                             | 0.0020                 | 0.292                              | 0.035                  | 0.0515                                | 0.0051                 | 0.882          | 260                                               | 27                    | 260                                               | 12                    | 265                                                  | 227                   | 190                         | 75                         | a                 |
| 0.0917                             | 0.0042                 | 0.748                              | 0.047                  | 0.0591                                | 0.0022                 | 0.773          | 567                                               | 27                    | 566                                               | 25                    | 572                                                  | 80                    | 180                         | 75                         | a                 |
| 0.1312                             | 0.0063                 | 1.192                              | 0.079                  | 0.0659                                | 0.0027                 | 0.819          | 797                                               | 37                    | 795                                               | 36                    | 803                                                  | 85                    | 140                         | 90                         | a                 |
| 0.1631                             | 0.0082                 | 1.618                              | 0.094                  | 0.0719                                | 0.0030                 |                | 977                                               | 36                    | 974                                               | 45                    | 984                                                  | 85                    | 164                         | 71                         | a                 |
| 0.1520                             | 0.0076                 | 1.467                              | 0.086                  | 0.0700                                | 0.0029                 |                | 917                                               | 35                    | 912                                               | 43                    | 927                                                  | 86                    | 103                         | 57                         | a                 |
| 0.0495                             | 0.0023                 | 0.361                              | 0.028                  | 0.0529                                | 0.0031                 | 0.910          | 313                                               | 21                    | 312                                               | 14                    | 324                                                  | 134                   | 280                         | 64                         | a                 |
| 0.0862                             | 0.0046                 | 0.695                              | 0.046                  | 0.0585                                | 0.0021                 | 0.803          | 536                                               | 27                    | 533                                               | 27                    | 549                                                  | 77                    | 170                         | 70                         | a                 |
| 0.188                              | 0.016                  | 1.96                               | 0.20                   | 0.0757                                | 0.0035                 | 0.908          | 1101                                              | 67                    | 1109                                              | 87                    | 1086                                                 | 92                    | 140                         | 70                         | a                 |
| 0.0584                             | 0.0026                 | 0.438                              | 0.029                  | 0.0544                                | 0.0025                 | 0.524          | 369                                               | 21                    | 366                                               | 16                    | 387                                                  | 102                   | 120                         | 90                         | a                 |
| 0.193                              | 0.010                  | 2.02                               | 0.13                   | 0.0762                                | 0.0024                 | 0.902          | 1123                                              | 44                    | 1135                                              | 56                    | 1099                                                 | 63                    | 100                         | 80                         | a                 |
| 0.1810                             | 0.0090                 | 1.90                               | 0.14                   | 0.0763                                | 0.0041                 |                | 1082                                              | 48                    | 1072                                              | 50                    | 1102                                                 | 108                   | 187                         | 84                         | a                 |
| 0.1191                             | 0.0065                 | 1.057                              | 0.099                  | 0.0643                                | 0.0044                 | 0.697          | 732                                               | 49                    | 725                                               | 38                    | 753                                                  | 145                   | 115                         | 65                         | a                 |
| 0.0511                             | 0.0026                 | 0.377                              | 0.024                  | 0.0535                                | 0.0022                 |                | 325                                               | 18                    | 321                                               | 16                    | 351                                                  | 93                    | 134                         | 80                         | a                 |
| 0.0548                             | 0.0027                 | 0.409                              | 0.037                  | 0.0541                                | 0.0033                 |                | 348                                               | 27                    | 344                                               | 17                    | 374                                                  | 139                   | 165                         | 62                         | a                 |
| 0.0464                             | 0.0022                 | 0.338                              | 0.024                  | 0.0529                                | 0.0027                 | 0.911          | 296                                               | 18                    | 293                                               | 13                    | 323                                                  | 115                   | 120                         | 65                         | a                 |
| 0.1658                             | 0.0079                 | 1.679                              | 0.097                  | 0.0735                                | 0.0022                 | 0.885          | 1001                                              | 37                    | 989                                               | 44                    | 1027                                                 | 59                    | 130                         | 105                        | a                 |
| 0.0479                             | 0.0023                 | 0.352                              | 0.019                  | 0.0532                                | 0.0014                 | 0.713          | 306                                               | 15                    | 302                                               | 14                    | 338                                                  | 60                    | 105                         | 75                         | a                 |
| 0.235                              | 0.012                  | 2.91                               | 0.18                   | 0.0897                                | 0.0037                 |                | 1383                                              | 46                    | 1361                                              | 62                    | 1419                                                 | 79                    | 152                         | 78                         | a                 |
| 0.0562                             | 0.0027                 | 0.425                              | 0.025                  | 0.0548                                | 0.0017                 | 0.711          | 359                                               | 18                    | 353                                               | 16                    | 403                                                  | 68                    | 140                         | 70                         | a                 |
| 0.0525                             | 0.0026                 | 0.393                              | 0.028                  | 0.0543                                | 0.0026                 |                | 336                                               | 20                    | 330                                               | 16                    | 383                                                  | 107                   | 139                         | 67                         | a                 |
| 0.1631                             | 0.0082                 | 1.669                              | 0.094                  | 0.0742                                | 0.0030                 |                | 997                                               | 36                    | 974                                               | 45                    | 1048                                                 | 81                    | 163                         | 72                         | a                 |

| $^{206}\text{Pb}^*/^{238}\text{U}$ | $\pm 2\sigma$<br>(abs) | $^{207}\text{Pb}^*/^{235}\text{U}$ | $\pm 2\sigma$<br>(abs) | $^{207}\text{Pb}^*/^{206}\text{Pb}^*$ | $\pm 2\sigma$<br>(abs) | corr.<br>coef. | $^{206}\text{Pb}^*/^{238}\text{U}$<br>age<br>(Ma) | $\pm 2\sigma$<br>(Ma) | $^{207}\text{Pb}^*/^{235}\text{U}$<br>age<br>(Ma) | $\pm 2\sigma$<br>(Ma) | $^{207}\text{Pb}^*/^{206}\text{Pb}^*$<br>age<br>(Ma) | $\pm 2\sigma$<br>(Ma) | Length<br>( $\mu\text{m}$ ) | Width<br>( $\mu\text{m}$ ) | Accept/<br>Reject |
|------------------------------------|------------------------|------------------------------------|------------------------|---------------------------------------|------------------------|----------------|---------------------------------------------------|-----------------------|---------------------------------------------------|-----------------------|------------------------------------------------------|-----------------------|-----------------------------|----------------------------|-------------------|
| 0.1846                             | 0.0092                 | 2.01                               | 0.20                   | 0.0789                                | 0.0059                 |                | 1118                                              | 68                    | 1092                                              | 50                    | 1170                                                 | 149                   | 107                         | 70                         | a                 |
| 0.0429                             | 0.0020                 | 0.314                              | 0.021                  | 0.0531                                | 0.0024                 | 0.908          | 277                                               | 16                    | 271                                               | 12                    | 334                                                  | 104                   | 140                         | 85                         | a                 |
| 0.208                              | 0.011                  | 2.19                               | 0.15                   | 0.0762                                | 0.0026                 | 0.904          | 1178                                              | 48                    | 1221                                              | 60                    | 1101                                                 | 68                    | 90                          | 80                         | a                 |
| 0.0372                             | 0.0016                 | 0.269                              | 0.016                  | 0.0524                                | 0.0019                 | 0.903          | 242                                               | 13                    | 236                                               | 10                    | 303                                                  | 83                    | 80                          | 45                         | a                 |
| 0.0679                             | 0.0030                 | 0.535                              | 0.029                  | 0.0572                                | 0.0016                 | 0.761          | 435                                               | 19                    | 423                                               | 18                    | 500                                                  | 62                    | 125                         | 110                        | a                 |
| 0.232                              | 0.012                  | 2.91                               | 0.17                   | 0.0909                                | 0.0036                 |                | 1385                                              | 44                    | 1346                                              | 61                    | 1446                                                 | 76                    | 153                         | 61                         | a                 |
| 0.1569                             | 0.0073                 | 1.592                              | 0.090                  | 0.0736                                | 0.0022                 | 0.874          | 967                                               | 35                    | 940                                               | 40                    | 1030                                                 | 60                    | 110                         | 105                        | a                 |
| 0.0845                             | 0.0042                 | 0.699                              | 0.044                  | 0.0600                                | 0.0026                 |                | 538                                               | 26                    | 523                                               | 25                    | 605                                                  | 93                    | 179                         | 85                         | a                 |
| 0.1603                             | 0.0076                 | 1.644                              | 0.094                  | 0.0744                                | 0.0021                 | 0.884          | 987                                               | 36                    | 958                                               | 42                    | 1052                                                 | 57                    | 110                         | 95                         | a                 |
| 0.0361                             | 0.0016                 | 0.262                              | 0.014                  | 0.0526                                | 0.0015                 | 0.522          | 236                                               | 11                    | 229                                               | 10                    | 309                                                  | 65                    | 105                         | 100                        | a                 |
| 0.253                              | 0.013                  | 3.39                               | 0.22                   | 0.0971                                | 0.0041                 |                | 1502                                              | 50                    | 1455                                              | 65                    | 1568                                                 | 80                    | 81                          | 50                         | a                 |
| 0.1780                             | 0.0089                 | 1.93                               | 0.11                   | 0.0785                                | 0.0032                 |                | 1090                                              | 37                    | 1056                                              | 49                    | 1159                                                 | 80                    | 90                          | 82                         | a                 |
| 0.248                              | 0.012                  | 3.28                               | 0.20                   | 0.0958                                | 0.0038                 |                | 1475                                              | 46                    | 1429                                              | 64                    | 1543                                                 | 75                    | 110                         | 81                         | a                 |
| 0.1105                             | 0.0055                 | 0.988                              | 0.058                  | 0.0649                                | 0.0026                 |                | 698                                               | 29                    | 676                                               | 32                    | 770                                                  | 86                    | 91                          | 76                         | a                 |
| 0.1423                             | 0.0065                 | 1.394                              | 0.078                  | 0.0711                                | 0.0021                 | 0.860          | 887                                               | 33                    | 858                                               | 37                    | 959                                                  | 61                    | 110                         | 85                         | a                 |
| 0.0387                             | 0.0017                 | 0.283                              | 0.015                  | 0.0530                                | 0.0015                 | 0.546          | 253                                               | 12                    | 244                                               | 11                    | 330                                                  | 66                    | 125                         | 110                        | a                 |
| 0.0394                             | 0.0020                 | 0.289                              | 0.018                  | 0.0532                                | 0.0021                 |                | 258                                               | 14                    | 249                                               | 12                    | 337                                                  | 91                    | 113                         | 93                         | a                 |
| 0.0386                             | 0.0019                 | 0.283                              | 0.021                  | 0.0532                                | 0.0027                 | 0.896          | 253                                               | 17                    | 244                                               | 12                    | 337                                                  | 116                   | 130                         | 85                         | a                 |
| 0.0376                             | 0.0019                 | 0.275                              | 0.019                  | 0.0531                                | 0.0024                 |                | 247                                               | 15                    | 238                                               | 12                    | 331                                                  | 104                   | 142                         | 91                         | a                 |
| 0.0622                             | 0.0029                 | 0.488                              | 0.032                  | 0.0569                                | 0.0024                 | 0.583          | 403                                               | 22                    | 389                                               | 17                    | 487                                                  | 95                    | 110                         | 70                         | a                 |
| 0.1731                             | 0.0087                 | 1.86                               | 0.11                   | 0.0781                                | 0.0034                 |                | 1069                                              | 40                    | 1029                                              | 48                    | 1150                                                 | 88                    | 106                         | 66                         | a                 |
| 0.0398                             | 0.0018                 | 0.294                              | 0.016                  | 0.0536                                | 0.0016                 | 0.570          | 262                                               | 13                    | 252                                               | 11                    | 354                                                  | 66                    | 155                         | 75                         | a                 |
| 0.0763                             | 0.0034                 | 0.626                              | 0.043                  | 0.0595                                | 0.0028                 | 0.611          | 494                                               | 27                    | 474                                               | 21                    | 584                                                  | 103                   | 135                         | 90                         | a                 |
| 0.1842                             | 0.0092                 | 2.06                               | 0.12                   | 0.0810                                | 0.0034                 |                | 1134                                              | 39                    | 1090                                              | 50                    | 1221                                                 | 81                    | 98                          | 103                        | a                 |
| 0.1391                             | 0.0063                 | 1.367                              | 0.074                  | 0.0713                                | 0.0019                 | 0.871          | 875                                               | 32                    | 839                                               | 36                    | 966                                                  | 55                    | 100                         | 90                         | a                 |
| 0.0327                             | 0.0016                 | 0.238                              | 0.028                  | 0.0528                                | 0.0042                 |                | 217                                               | 23                    | 208                                               | 10                    | 320                                                  | 179                   | 105                         | 85                         | a                 |
| 0.1805                             | 0.0090                 | 2.01                               | 0.12                   | 0.0807                                | 0.0035                 |                | 1118                                              | 41                    | 1070                                              | 49                    | 1213                                                 | 86                    | 193                         | 76                         | a                 |
| 0.1625                             | 0.0076                 | 1.717                              | 0.099                  | 0.0766                                | 0.0024                 | 0.868          | 1015                                              | 37                    | 971                                               | 42                    | 1112                                                 | 62                    | 120                         | 95                         | a                 |
| 0.1561                             | 0.0074                 | 1.621                              | 0.090                  | 0.0753                                | 0.0020                 | 0.885          | 978                                               | 35                    | 935                                               | 41                    | 1077                                                 | 53                    | 115                         | 95                         | a                 |
| 0.1567                             | 0.0074                 | 1.639                              | 0.091                  | 0.0758                                | 0.0020                 | 0.885          | 985                                               | 35                    | 938                                               | 41                    | 1091                                                 | 53                    | 155                         | 95                         | a                 |
| 0.1506                             | 0.0069                 | 1.550                              | 0.084                  | 0.0746                                | 0.0020                 | 0.879          | 950                                               | 33                    | 904                                               | 39                    | 1059                                                 | 53                    | 135                         | 100                        | a                 |
| 0.1073                             | 0.0054                 | 0.974                              | 0.066                  | 0.0659                                | 0.0031                 |                | 691                                               | 34                    | 657                                               | 31                    | 802                                                  | 99                    | 155                         | 64                         | a                 |
| 0.0294                             | 0.0013                 | 0.213                              | 0.012                  | 0.0527                                | 0.0016                 | 0.893          | 196                                               | 10                    | 187                                               | 8                     | 316                                                  | 69                    | 175                         | 800                        | a                 |
| 0.1472                             | 0.0071                 | 1.506                              | 0.085                  | 0.0742                                | 0.0020                 | 0.880          | 933                                               | 35                    | 885                                               | 40                    | 1047                                                 | 55                    | 105                         | 75                         | a                 |
| 0.1450                             | 0.0066                 | 1.489                              | 0.082                  | 0.0745                                | 0.0021                 | 0.864          | 926                                               | 34                    | 873                                               | 37                    | 1055                                                 | 57                    | 130                         | 100                        | a                 |
| 0.1436                             | 0.0066                 | 1.470                              | 0.080                  | 0.0743                                | 0.0020                 | 0.875          | 918                                               | 33                    | 865                                               | 37                    | 1049                                                 | 53                    | 135                         | 80                         | a                 |
| 0.1264                             | 0.0063                 | 1.231                              | 0.083                  | 0.0706                                | 0.0034                 |                | 815                                               | 38                    | 767                                               | 36                    | 947                                                  | 99                    | 153                         | 70                         | a                 |
| 0.1552                             | 0.0078                 | 1.65                               | 0.17                   | 0.0772                                | 0.0060                 |                | 990                                               | 67                    | 930                                               | 43                    | 1126                                                 | 155                   | 106                         | 78                         | a                 |
| 0.1192                             | 0.0055                 | 1.142                              | 0.064                  | 0.0695                                | 0.0020                 | 0.844          | 773                                               | 30                    | 726                                               | 32                    | 913                                                  | 59                    | 175                         | 65                         | a                 |
| 0.1670                             | 0.0079                 | 1.84                               | 0.10                   | 0.0801                                | 0.0022                 | 0.883          | 1061                                              | 37                    | 995                                               | 44                    | 1199                                                 | 54                    | 125                         | 70                         | a                 |
| 0.1434                             | 0.0072                 | 1.480                              | 0.086                  | 0.0749                                | 0.0020                 | 0.882          | 922                                               | 35                    | 864                                               | 41                    | 1065                                                 | 54                    | 130                         | 70                         | a                 |
| 0.216                              | 0.011                  | 2.78                               | 0.17                   | 0.0931                                | 0.0041                 |                | 1349                                              | 47                    | 1263                                              | 58                    | 1489                                                 | 83                    | 103                         | 86                         | a                 |
| 0.0793                             | 0.0038                 | 0.681                              | 0.045                  | 0.0622                                | 0.0026                 | 0.686          | 527                                               | 27                    | 492                                               | 23                    | 682                                                  | 89                    | 105                         | 90                         | a                 |
| 0.0288                             | 0.0013                 | 0.213                              | 0.014                  | 0.0537                                | 0.0024                 | 0.866          | 196                                               | 12                    | 183                                               | 8                     | 359                                                  | 101                   | 110                         | 85                         | a                 |
| 0.1203                             | 0.0064                 | 1.169                              | 0.074                  | 0.0705                                | 0.0022                 | 0.855          | 786                                               | 35                    | 732                                               | 37                    | 942                                                  | 63                    | 215                         | 55                         | a                 |
| 0.1457                             | 0.0073                 | 1.528                              | 0.094                  | 0.0761                                | 0.0033                 |                | 942                                               | 38                    | 877                                               | 41                    | 1098                                                 | 88                    | 123                         | 80                         | a                 |
| 0.1828                             | 0.0091                 | 2.15                               | 0.12                   | 0.0851                                | 0.0034                 |                | 1164                                              | 39                    | 1082                                              | 50                    | 1319                                                 | 78                    | 136                         | 94                         | a                 |
| 0.0817                             | 0.0037                 | 0.709                              | 0.041                  | 0.0630                                | 0.0021                 | 0.747          | 544                                               | 24                    | 506                                               | 22                    | 708                                                  | 70                    | 100                         | 105                        | a                 |
| 0.1396                             | 0.0063                 | 1.447                              | 0.077                  | 0.0752                                | 0.0020                 | 0.868          | 909                                               | 32                    | 842                                               | 36                    | 1074                                                 | 53                    | 130                         | 95                         | a                 |
| 0.1557                             | 0.0078                 | 1.71                               | 0.10                   | 0.0797                                | 0.0034                 |                | 1013                                              | 38                    | 933                                               | 44                    | 1190                                                 | 85                    | 104                         | 67                         | a                 |
| 0.0869                             | 0.0042                 | 0.779                              | 0.054                  | 0.0650                                | 0.0029                 | 0.685          | 585                                               | 31                    | 537                                               | 25                    | 774                                                  | 95                    | 110                         | 55                         | a                 |

| $^{206}\text{Pb}^*/^{238}\text{U}$ | $\pm 2\sigma$<br>(abs) | $^{207}\text{Pb}^*/^{235}\text{U}$ | $\pm 2\sigma$<br>(abs) | $^{207}\text{Pb}^*/^{206}\text{Pb}^*$ | $\pm 2\sigma$<br>(abs) | corr.<br>coef. | $^{206}\text{Pb}^*/^{238}\text{U}$<br>age<br>(Ma) | $\pm 2\sigma$<br>(Ma) | $^{207}\text{Pb}^*/^{235}\text{U}$<br>age<br>(Ma) | $\pm 2\sigma$<br>(Ma) | $^{207}\text{Pb}^*/^{206}\text{Pb}^*$<br>age<br>(Ma) | $\pm 2\sigma$<br>(Ma) | Length<br>( $\mu\text{m}$ ) | Width<br>( $\mu\text{m}$ ) | Accept/<br>Reject |
|------------------------------------|------------------------|------------------------------------|------------------------|---------------------------------------|------------------------|----------------|---------------------------------------------------|-----------------------|---------------------------------------------------|-----------------------|------------------------------------------------------|-----------------------|-----------------------------|----------------------------|-------------------|
| 0.1455                             | 0.0073                 | 1.565                              | 0.089                  | 0.0780                                | 0.0032                 |                | 956                                               | 35                    | 876                                               | 41                    | 1147                                                 | 81                    | 187                         | 73                         | a                 |
| 0.275                              | 0.014                  | 4.39                               | 0.27                   | 0.1158                                | 0.0047                 |                | 1711                                              | 51                    | 1567                                              | 70                    | 1893                                                 | 72                    | 131                         | 76                         | a                 |
| 0.0378                             | 0.0017                 | 0.293                              | 0.022                  | 0.0563                                | 0.0031                 | 0.889          | 261                                               | 18                    | 239                                               | 11                    | 465                                                  | 122                   | 100                         | 80                         | a                 |
| 0.1290                             | 0.0064                 | 1.32                               | 0.14                   | 0.0743                                | 0.0056                 |                | 855                                               | 59                    | 782                                               | 37                    | 1049                                                 | 152                   | 120                         | 56                         | a                 |
| 0.305                              | 0.015                  | 5.35                               | 2.13                   | 0.127                                 | 0.036                  |                | 1876                                              | 340                   | 1714                                              | 76                    | 2062                                                 | 493                   | 102                         | 43                         | a                 |
| 0.204                              | 0.010                  | 2.64                               | 0.17                   | 0.0938                                | 0.0042                 |                | 1311                                              | 46                    | 1197                                              | 55                    | 1503                                                 | 84                    | 126                         | 74                         | a                 |
| 0.0201                             | 0.0010                 | 0.149                              | 0.014                  | 0.0536                                | 0.0032                 |                | 141                                               | 12                    | 129                                               | 6                     | 353                                                  | 134                   | 135                         | 95                         | a                 |
| 0.0373                             | 0.0017                 | 0.290                              | 0.017                  | 0.0564                                | 0.0018                 | 0.914          | 258                                               | 13                    | 236                                               | 11                    | 469                                                  | 72                    | 125                         | 85                         | a                 |
| 0.01492                            | 0.00071                | 0.1086                             | 0.0078                 | 0.0528                                | 0.0026                 | 0.738          | 105                                               | 7                     | 95                                                | 5                     | 320                                                  | 111                   | 150                         | 70                         | a                 |
| 0.1396                             | 0.0064                 | 1.488                              | 0.084                  | 0.0773                                | 0.0023                 | 0.845          | 926                                               | 34                    | 843                                               | 36                    | 1129                                                 | 60                    | 180                         | 95                         | a                 |
| 0.1650                             | 0.0083                 | 1.90                               | 0.14                   | 0.0836                                | 0.0044                 |                | 1082                                              | 48                    | 985                                               | 46                    | 1283                                                 | 102                   | 101                         | 74                         | a                 |
| 0.332                              | 0.017                  | 6.41                               | 0.99                   | 0.140                                 | 0.014                  |                | 2034                                              | 136                   | 1848                                              | 81                    | 2228                                                 | 172                   | 86                          | 59                         | a                 |
| 0.1311                             | 0.0063                 | 1.387                              | 0.081                  | 0.0767                                | 0.0024                 | 0.839          | 883                                               | 34                    | 794                                               | 36                    | 1114                                                 | 62                    | 140                         | 95                         | a                 |
| 0.0315                             | 0.0016                 | 0.246                              | 0.019                  | 0.0567                                | 0.0029                 |                | 224                                               | 16                    | 200                                               | 10                    | 480                                                  | 112                   | 188                         | 75                         | a                 |
| 0.1359                             | 0.0069                 | 1.471                              | 0.090                  | 0.0785                                | 0.0025                 | 0.848          | 919                                               | 37                    | 821                                               | 39                    | 1161                                                 | 62                    | 125                         | 65                         | a                 |
| 0.0749                             | 0.0036                 | 0.673                              | 0.059                  | 0.0651                                | 0.0045                 | 0.939          | 522                                               | 36                    | 466                                               | 21                    | 778                                                  | 146                   | 90                          | 65                         | a                 |
| 0.0900                             | 0.0045                 | 0.849                              | 0.090                  | 0.0684                                | 0.0057                 | 0.948          | 624                                               | 49                    | 556                                               | 27                    | 882                                                  | 173                   | 160                         | 70                         | a                 |
| 0.00367                            | 0.00019                | 0.0265                             | 0.0058                 | 0.052                                 | 0.010                  | *              | 27                                                | 6                     | 24                                                | 1                     | 301                                                  | 454                   | 110                         | 85                         | a                 |
| 0.0243                             | 0.0013                 | 0.188                              | 0.021                  | 0.0561                                | 0.0051                 | 0.810          | 175                                               | 18                    | 155                                               | 8                     | 458                                                  | 200                   | 110                         | 95                         | a                 |
| 0.0394                             | 0.0019                 | 0.324                              | 0.024                  | 0.0596                                | 0.0030                 | 0.900          | 285                                               | 18                    | 249                                               | 12                    | 590                                                  | 109                   | 130                         | 30                         | a                 |
| 0.01118                            | 0.00056                | 0.084                              | 0.013                  | 0.0546                                | 0.0055                 |                | 82                                                | 13                    | 72                                                | 4                     | 396                                                  | 227                   | 132                         | 76                         | a                 |
| 0.02009                            | 0.00093                | 0.157                              | 0.011                  | 0.0567                                | 0.0025                 | 0.812          | 148                                               | 9                     | 128                                               | 6                     | 480                                                  | 98                    | 150                         | 80                         | a                 |
| 0.1679                             | 0.0084                 | 2.23                               | 0.22                   | 0.0963                                | 0.0071                 |                | 1190                                              | 70                    | 1001                                              | 47                    | 1553                                                 | 139                   | 160                         | 75                         | a                 |
| 0.0230                             | 0.0011                 | 0.189                              | 0.016                  | 0.0597                                | 0.0038                 | 0.810          | 176                                               | 13                    | 146                                               | 7                     | 592                                                  | 137                   | 150                         | 70                         | a                 |
| 0.0810                             | 0.0041                 | 0.825                              | 0.054                  | 0.0739                                | 0.0033                 |                | 611                                               | 30                    | 502                                               | 24                    | 1039                                                 | 91                    | 100                         | 77                         | a                 |
| 0.1385                             | 0.0069                 | 1.74                               | 0.15                   | 0.0911                                | 0.0058                 |                | 1023                                              | 56                    | 836                                               | 39                    | 1448                                                 | 121                   | 94                          | 73                         | a                 |
| 0.00337                            | 0.00017                | 0.0267                             | 0.0053                 | 0.0576                                | 0.0073                 |                | 27                                                | 5                     | 22                                                | 1                     | 513                                                  | 277                   | 70                          | 136                        | a                 |
| 0.1341                             | 0.0095                 | 1.69                               | 0.13                   | 0.0914                                | 0.0026                 | 0.887          | 1005                                              | 49                    | 811                                               | 54                    | 1456                                                 | 53                    | 160                         | 60                         | a                 |
| 0.0223                             | 0.0014                 | 0.194                              | 0.022                  | 0.0631                                | 0.0053                 | 0.812          | 180                                               | 19                    | 142                                               | 9                     | 711                                                  | 178                   | 155                         | 80                         | a                 |
| 0.1443                             | 0.0072                 | 1.97                               | 0.16                   | 0.0990                                | 0.0059                 |                | 1105                                              | 56                    | 869                                               | 41                    | 1605                                                 | 111                   | 110                         | 99                         | a                 |
| 0.00403                            | 0.00020                | 0.033                              | 0.011                  | 0.059                                 | 0.013                  |                | 33                                                | 11                    | 26                                                | 1                     | 584                                                  | 457                   | 146                         | 77                         | a                 |
| 0.1403                             | 0.0084                 | 1.89                               | 0.19                   | 0.0979                                | 0.0069                 | 0.626          | 1079                                              | 66                    | 846                                               | 48                    | 1584                                                 | 131                   | 100                         | 70                         | a                 |
| 0.00849                            | 0.00042                | 0.072                              | 0.016                  | 0.0616                                | 0.0087                 |                | 71                                                | 15                    | 54                                                | 3                     | 661                                                  | 301                   | 136                         | 53                         | a                 |
| 0.01262                            | 0.00060                | 0.113                              | 0.012                  | 0.0649                                | 0.0055                 | 0.633          | 109                                               | 11                    | 81                                                | 4                     | 772                                                  | 178                   | 125                         | 55                         | r                 |
| 0.0340                             | 0.0017                 | 0.338                              | 0.092                  | 0.072                                 | 0.013                  |                | 295                                               | 70                    | 215                                               | 11                    | 989                                                  | 377                   | 134                         | 66                         | r                 |
| 0.00675                            | 0.00045                | 0.063                              | 0.030                  | 0.068                                 | 0.030                  | 0.021          | 62                                                | 29                    | 43                                                | 3                     | 865                                                  | 921                   | 100                         | 90                         | a                 |
| 0.0740                             | 0.0039                 | 0.928                              | 0.057                  | 0.0910                                | 0.0026                 | 0.702          | 666                                               | 30                    | 460                                               | 23                    | 1446                                                 | 54                    | 120                         | 75                         | r                 |
| 0.01301                            | 0.00065                | 0.127                              | 0.027                  | 0.0709                                | 0.0096                 |                | 122                                               | 24                    | 83                                                | 4                     | 954                                                  | 276                   | 143                         | 82                         | r                 |
| 0.0808                             | 0.0040                 | 1.06                               | 0.18                   | 0.095                                 | 0.011                  |                | 734                                               | 87                    | 501                                               | 24                    | 1532                                                 | 220                   | 104                         | 87                         | r                 |
| 0.00584                            | 0.00029                | 0.0561                             | 0.0089                 | 0.0697                                | 0.0096                 | *              | 55                                                | 9                     | 38                                                | 2                     | 918                                                  | 285                   | 115                         | 60                         | r                 |
| 0.00673                            | 0.00034                | 0.067                              | 0.024                  | 0.072                                 | 0.016                  |                | 66                                                | 22                    | 43                                                | 2                     | 997                                                  | 457                   | 128                         | 65                         | r                 |
| 0.0353                             | 0.0016                 | 0.445                              | 0.054                  | 0.0914                                | 0.0094                 | 0.861          | 374                                               | 38                    | 224                                               | 10                    | 1454                                                 | 197                   | 90                          | 95                         | r                 |
| 0.00868                            | 0.00066                | 0.097                              | 0.015                  | 0.0807                                | 0.0093                 | 0.470          | 94                                                | 13                    | 56                                                | 4                     | 1214                                                 | 226                   | 90                          | 75                         | r                 |
| 0.00244                            | 0.00031                | 0.032                              | 0.018                  | 0.096                                 | 0.045                  | *              | 32                                                | 17                    | 16                                                | 2                     | 1543                                                 | 881                   | 160                         | 100                        | r                 |
| 0.00143                            | 0.00032                | 0.019                              | 0.028                  | 0.10                                  | 0.12                   | *              | 19                                                | 28                    | 9                                                 | 2                     | 1547                                                 | 2426                  | 175                         | 85                         | r                 |
| 0.00171                            | 0.00013                | 0.0266                             | 0.0073                 | 0.113                                 | 0.028                  | *              | 27                                                | 7                     | 11                                                | 1                     | 1841                                                 | 442                   | 95                          | 85                         | r                 |
| 0.00481                            | 0.00033                | 0.077                              | 0.013                  | 0.117                                 | 0.015                  | *              | 76                                                | 12                    | 31                                                | 2                     | 1906                                                 | 233                   | 125                         | 110                        | r                 |
| 0.0630                             | 0.0031                 | 1.99                               | 0.42                   | 0.230                                 | 0.034                  |                | 1113                                              | 142                   | 394                                               | 19                    | 3049                                                 | 239                   | 96                          | 83                         | r                 |
| 0.0547                             | 0.0096                 | 1.63                               | 0.56                   | 0.217                                 | 0.055                  | 0.921          | 983                                               | 214                   | 343                                               | 59                    | 2956                                                 | 407                   | 155                         | 85                         | r                 |
| 0.0599                             | 0.0046                 | 2.01                               | 0.51                   | 0.243                                 | 0.053                  | 0.917          | 1118                                              | 173                   | 375                                               | 28                    | 3141                                                 | 345                   | 155                         | 75                         | r                 |
| 0.00041                            | 0.00048                | 0.012                              | 0.036                  | 0.20                                  | 0.35                   | *              | 12                                                | 36                    | 3                                                 | 3                     | 2862                                                 | 2781                  | 144                         | 94                         | r                 |

| $^{206}\text{Pb}^*/^{238}\text{U}$                   | $\pm 2\sigma$<br>(abs) | $^{207}\text{Pb}^*/^{235}\text{U}$ | $\pm 2\sigma$<br>(abs) | $^{207}\text{Pb}^*/^{206}\text{Pb}^*$ | $\pm 2\sigma$<br>(abs) | corr.<br>coef. | $^{206}\text{Pb}^*/^{238}\text{U}$<br>age<br>(Ma) | $\pm 2\sigma$<br>(Ma) | $^{207}\text{Pb}^*/^{235}\text{U}$<br>age<br>(Ma) | $\pm 2\sigma$<br>(Ma) | $^{207}\text{Pb}^*/^{206}\text{Pb}^*$<br>age<br>(Ma) | $\pm 2\sigma$<br>(Ma) | Length<br>( $\mu\text{m}$ ) | Width<br>( $\mu\text{m}$ ) | Accept/<br>Reject |
|------------------------------------------------------|------------------------|------------------------------------|------------------------|---------------------------------------|------------------------|----------------|---------------------------------------------------|-----------------------|---------------------------------------------------|-----------------------|------------------------------------------------------|-----------------------|-----------------------------|----------------------------|-------------------|
| <b>13. Rio Amazons, Brazil (3.3743°S, 58.7234°W)</b> |                        |                                    |                        |                                       |                        |                |                                                   |                       |                                                   |                       |                                                      |                       |                             |                            |                   |
| 0.344                                                | 0.017                  | 4.46                               | 0.49                   | 0.0940                                | 0.0037                 |                | 1723                                              | 90                    | 1906                                              | 83                    | 1507                                                 | 74                    | 121                         | 83                         | a                 |
| 0.1299                                               | 0.0065                 | 1.02                               | 0.14                   | 0.0572                                | 0.0047                 |                | 716                                               | 71                    | 787                                               | 37                    | 500                                                  | 179                   | 103                         | 67                         | a                 |
| 0.340                                                | 0.017                  | 4.57                               | 0.40                   | 0.0974                                | 0.0025                 |                | 1744                                              | 73                    | 1888                                              | 82                    | 1575                                                 | 49                    | 83                          | 51                         | a                 |
| 0.1361                                               | 0.0068                 | 1.126                              | 0.073                  | 0.0600                                | 0.0017                 |                | 766                                               | 35                    | 823                                               | 39                    | 604                                                  | 62                    | 115                         | 74                         | a                 |
| 0.1767                                               | 0.0088                 | 1.63                               | 0.11                   | 0.0667                                | 0.0018                 |                | 980                                               | 43                    | 1049                                              | 49                    | 829                                                  | 56                    | 94                          | 60                         | a                 |
| 0.254                                                | 0.013                  | 2.86                               | 0.21                   | 0.0815                                | 0.0022                 |                | 1371                                              | 56                    | 1461                                              | 66                    | 1233                                                 | 53                    | 94                          | 82                         | a                 |
| 0.251                                                | 0.013                  | 2.81                               | 0.30                   | 0.0812                                | 0.0033                 |                | 1359                                              | 81                    | 1446                                              | 65                    | 1225                                                 | 80                    | 111                         | 60                         | a                 |
| 0.1287                                               | 0.0064                 | 1.064                              | 0.071                  | 0.0600                                | 0.0019                 |                | 736                                               | 35                    | 780                                               | 37                    | 603                                                  | 67                    | 138                         | 59                         | a                 |
| 0.0581                                               | 0.0029                 | 0.407                              | 0.028                  | 0.0508                                | 0.0018                 |                | 347                                               | 20                    | 364                                               | 18                    | 232                                                  | 84                    | 115                         | 82                         | a                 |
| 0.378                                                | 0.019                  | 5.97                               | 0.61                   | 0.1144                                | 0.0031                 |                | 1971                                              | 89                    | 2068                                              | 89                    | 1871                                                 | 49                    | 97                          | 67                         | a                 |
| 0.211                                                | 0.011                  | 2.22                               | 0.16                   | 0.0762                                | 0.0021                 |                | 1188                                              | 50                    | 1237                                              | 57                    | 1100                                                 | 55                    | 123                         | 54                         | a                 |
| 0.1990                                               | 0.0099                 | 2.04                               | 0.17                   | 0.0744                                | 0.0025                 |                | 1130                                              | 56                    | 1170                                              | 54                    | 1053                                                 | 68                    | 79                          | 55                         | a                 |
| 0.0546                                               | 0.0027                 | 0.386                              | 0.022                  | 0.0513                                | 0.0014                 |                | 332                                               | 16                    | 343                                               | 17                    | 255                                                  | 61                    | 122                         | 98                         | a                 |
| 0.234                                                | 0.012                  | 2.67                               | 0.19                   | 0.0827                                | 0.0022                 |                | 1319                                              | 53                    | 1355                                              | 61                    | 1262                                                 | 51                    | 114                         | 69                         | a                 |
| 0.0559                                               | 0.0028                 | 0.401                              | 0.024                  | 0.0521                                | 0.0016                 |                | 342                                               | 18                    | 351                                               | 17                    | 288                                                  | 70                    | 167                         | 85                         | a                 |
| 0.259                                                | 0.013                  | 3.19                               | 0.26                   | 0.0894                                | 0.0026                 |                | 1454                                              | 62                    | 1483                                              | 67                    | 1412                                                 | 55                    | 14                          | 49                         | a                 |
| 0.1716                                               | 0.0086                 | 1.68                               | 0.13                   | 0.0711                                | 0.0023                 |                | 1001                                              | 48                    | 1021                                              | 47                    | 959                                                  | 67                    | 135                         | 65                         | a                 |
| 0.249                                                | 0.012                  | 3.04                               | 0.22                   | 0.0887                                | 0.0023                 |                | 1419                                              | 56                    | 1433                                              | 65                    | 1397                                                 | 50                    | 106                         | 71                         | a                 |
| 0.1147                                               | 0.0057                 | 0.983                              | 0.060                  | 0.0621                                | 0.0017                 |                | 695                                               | 31                    | 700                                               | 33                    | 678                                                  | 58                    | 125                         | 69                         | a                 |
| 0.1127                                               | 0.0056                 | 0.961                              | 0.063                  | 0.0619                                | 0.0019                 |                | 684                                               | 33                    | 688                                               | 33                    | 669                                                  | 67                    | 116                         | 71                         | a                 |
| 0.0330                                               | 0.0017                 | 0.228                              | 0.020                  | 0.0500                                | 0.0028                 |                | 208                                               | 17                    | 209                                               | 10                    | 193                                                  | 129                   | 161                         | 102                        | a                 |
| 0.0817                                               | 0.0041                 | 0.651                              | 0.039                  | 0.0578                                | 0.0016                 |                | 509                                               | 24                    | 506                                               | 24                    | 522                                                  | 62                    | 139                         | 65                         | a                 |
| 0.0820                                               | 0.0041                 | 0.667                              | 0.039                  | 0.0590                                | 0.0016                 |                | 519                                               | 24                    | 508                                               | 24                    | 567                                                  | 58                    | 114                         | 108                        | a                 |
| 0.0849                                               | 0.0042                 | 0.697                              | 0.049                  | 0.0596                                | 0.0022                 |                | 537                                               | 30                    | 525                                               | 25                    | 588                                                  | 80                    | 143                         | 79                         | a                 |
| 0.0714                                               | 0.0036                 | 0.57                               | 0.11                   | 0.0574                                | 0.0072                 |                | 455                                               | 70                    | 445                                               | 22                    | 508                                                  | 276                   | 109                         | 53                         | a                 |
| 0.1786                                               | 0.0089                 | 1.91                               | 0.14                   | 0.0777                                | 0.0024                 |                | 1085                                              | 49                    | 1059                                              | 49                    | 1138                                                 | 62                    | 95                          | 63                         | a                 |
| 0.0897                                               | 0.0045                 | 0.751                              | 0.046                  | 0.0607                                | 0.0018                 |                | 569                                               | 27                    | 554                                               | 27                    | 628                                                  | 64                    | 109                         | 93                         | a                 |
| 0.0539                                               | 0.0027                 | 0.409                              | 0.026                  | 0.0551                                | 0.0018                 |                | 348                                               | 18                    | 338                                               | 17                    | 416                                                  | 71                    | 131                         | 56                         | a                 |
| 0.244                                                | 0.012                  | 3.20                               | 0.23                   | 0.0950                                | 0.0025                 |                | 1456                                              | 56                    | 1408                                              | 64                    | 1528                                                 | 50                    | 150                         | 71                         | a                 |
| 0.0971                                               | 0.0049                 | 0.840                              | 0.051                  | 0.0627                                | 0.0017                 |                | 619                                               | 28                    | 597                                               | 29                    | 699                                                  | 58                    | 116                         | 86                         | a                 |
| 0.1583                                               | 0.0079                 | 1.64                               | 0.11                   | 0.0752                                | 0.0020                 |                | 986                                               | 41                    | 948                                               | 44                    | 1073                                                 | 52                    | 124                         | 95                         | a                 |
| 0.1531                                               | 0.0077                 | 1.57                               | 0.11                   | 0.0743                                | 0.0023                 |                | 958                                               | 44                    | 918                                               | 43                    | 1051                                                 | 62                    | 121                         | 63                         | a                 |
| 0.305                                                | 0.015                  | 4.83                               | 0.44                   | 0.1150                                | 0.0034                 |                | 1791                                              | 76                    | 1716                                              | 76                    | 1879                                                 | 53                    | 76                          | 69                         | a                 |
| 0.1626                                               | 0.0081                 | 1.72                               | 0.12                   | 0.0768                                | 0.0024                 |                | 1017                                              | 46                    | 971                                               | 45                    | 1116                                                 | 61                    | 97                          | 69                         | a                 |
| 0.1350                                               | 0.0067                 | 1.34                               | 0.11                   | 0.0720                                | 0.0033                 |                | 863                                               | 50                    | 816                                               | 38                    | 985                                                  | 94                    | 139                         | 98                         | a                 |
| 0.0752                                               | 0.0038                 | 0.628                              | 0.038                  | 0.0606                                | 0.0017                 |                | 495                                               | 23                    | 468                                               | 23                    | 625                                                  | 61                    | 160                         | 90                         | a                 |
| 0.1789                                               | 0.0089                 | 2.04                               | 0.14                   | 0.0825                                | 0.0023                 |                | 1127                                              | 47                    | 1061                                              | 49                    | 1257                                                 | 54                    | 75                          | 69                         | a                 |
| 0.311                                                | 0.016                  | 5.25                               | 0.43                   | 0.1223                                | 0.0032                 |                | 1861                                              | 70                    | 1748                                              | 77                    | 1990                                                 | 46                    | 77                          | 58                         | a                 |
| 0.282                                                | 0.014                  | 4.40                               | 0.46                   | 0.1130                                | 0.0043                 |                | 1712                                              | 86                    | 1603                                              | 71                    | 1849                                                 | 68                    | 128                         | 66                         | a                 |
| 0.296                                                | 0.015                  | 4.79                               | 0.45                   | 0.1176                                | 0.0037                 |                | 1784                                              | 79                    | 1670                                              | 74                    | 1920                                                 | 56                    | 93                          | 80                         | a                 |
| 0.1061                                               | 0.0053                 | 0.984                              | 0.068                  | 0.0673                                | 0.0022                 |                | 696                                               | 35                    | 650                                               | 31                    | 847                                                  | 69                    | 140                         | 53                         | a                 |
| 0.1734                                               | 0.0087                 | 1.97                               | 0.13                   | 0.0825                                | 0.0022                 |                | 1106                                              | 46                    | 1031                                              | 48                    | 1258                                                 | 53                    | 98                          | 67                         | a                 |
| 0.01225                                              | 0.00061                | 0.0867                             | 0.0081                 | 0.0513                                | 0.0031                 |                | 84                                                | 8                     | 79                                                | 4                     | 255                                                  | 140                   | 129                         | 60                         | a                 |
| 0.1516                                               | 0.0076                 | 1.63                               | 0.12                   | 0.0780                                | 0.0025                 |                | 982                                               | 46                    | 910                                               | 43                    | 1147                                                 | 65                    | 103                         | 57                         | a                 |
| 0.0418                                               | 0.0021                 | 0.324                              | 0.024                  | 0.0563                                | 0.0024                 |                | 285                                               | 19                    | 264                                               | 13                    | 462                                                  | 96                    | 133                         | 65                         | a                 |
| 0.0279                                               | 0.0014                 | 0.209                              | 0.023                  | 0.0545                                | 0.0040                 |                | 193                                               | 19                    | 177                                               | 9                     | 390                                                  | 164                   | 122                         | 70                         | a                 |
| 0.0796                                               | 0.0040                 | 0.703                              | 0.048                  | 0.0640                                | 0.0023                 |                | 541                                               | 29                    | 494                                               | 24                    | 743                                                  | 76                    | 89                          | 68                         | a                 |
| 0.1053                                               | 0.0053                 | 1.008                              | 0.067                  | 0.0694                                | 0.0023                 |                | 708                                               | 34                    | 645                                               | 31                    | 911                                                  | 67                    | 177                         | 83                         | a                 |
| 0.1907                                               | 0.0095                 | 2.45                               | 0.17                   | 0.0933                                | 0.0025                 |                | 1258                                              | 50                    | 1125                                              | 52                    | 1493                                                 | 51                    | 150                         | 75                         | a                 |
| 0.219                                                | 0.011                  | 3.14                               | 0.37                   | 0.1043                                | 0.0061                 |                | 1443                                              | 90                    | 1274                                              | 58                    | 1702                                                 | 107                   | 115                         | 75                         | a                 |

| $^{206}\text{Pb}^*/^{238}\text{U}$                    | $\pm 2\sigma$<br>(abs) | $^{207}\text{Pb}^*/^{235}\text{U}$ | $\pm 2\sigma$<br>(abs) | $^{207}\text{Pb}^*/^{206}\text{Pb}^*$ | $\pm 2\sigma$<br>(abs) | corr.<br>coef. | $^{206}\text{Pb}^*/^{238}\text{U}$<br>age<br>(Ma) | $\pm 2\sigma$<br>(Ma) | $^{207}\text{Pb}^*/^{235}\text{U}$<br>age<br>(Ma) | $\pm 2\sigma$<br>(Ma) | $^{207}\text{Pb}^*/^{206}\text{Pb}^*$<br>age<br>(Ma) | $\pm 2\sigma$<br>(Ma) | Length<br>( $\mu\text{m}$ ) | Width<br>( $\mu\text{m}$ ) | Accept/<br>Reject |
|-------------------------------------------------------|------------------------|------------------------------------|------------------------|---------------------------------------|------------------------|----------------|---------------------------------------------------|-----------------------|---------------------------------------------------|-----------------------|------------------------------------------------------|-----------------------|-----------------------------|----------------------------|-------------------|
| 0.356                                                 | 0.018                  | 8.21                               | 0.76                   | 0.1674                                | 0.0045                 |                | 2254                                              | 84                    | 1962                                              | 85                    | 2531                                                 | 45                    | 132                         | 66                         | a                 |
| 0.0568                                                | 0.0028                 | 0.516                              | 0.034                  | 0.0658                                | 0.0023                 |                | 422                                               | 23                    | 356                                               | 17                    | 800                                                  | 73                    | 82                          | 66                         | a                 |
| 0.0840                                                | 0.0042                 | 0.838                              | 0.063                  | 0.0723                                | 0.0027                 |                | 618                                               | 35                    | 520                                               | 25                    | 996                                                  | 75                    | 116                         | 68                         | a                 |
| 0.1235                                                | 0.0062                 | 1.47                               | 0.11                   | 0.0866                                | 0.0027                 |                | 920                                               | 43                    | 750                                               | 36                    | 1353                                                 | 61                    | 128                         | 78                         | a                 |
| 0.1479                                                | 0.0074                 | 2.02                               | 0.19                   | 0.0991                                | 0.0049                 |                | 1122                                              | 63                    | 889                                               | 42                    | 1607                                                 | 92                    | 131                         | 48                         | a                 |
| 0.1306                                                | 0.0065                 | 1.75                               | 0.13                   | 0.0974                                | 0.0036                 |                | 1028                                              | 48                    | 791                                               | 37                    | 1575                                                 | 69                    | 100                         | 57                         | r                 |
| 0.1256                                                | 0.0063                 | 1.67                               | 0.97                   | 0.097                                 | 0.036                  |                | 998                                               | 369                   | 763                                               | 36                    | 1558                                                 | 701                   | 99                          | 75                         | r                 |
| 0.0939                                                | 0.0047                 | 1.11                               | 0.18                   | 0.0860                                | 0.0086                 |                | 760                                               | 85                    | 579                                               | 28                    | 1338                                                 | 193                   | 78                          | 48                         | r                 |
| 0.1134                                                | 0.0057                 | 1.70                               | 0.34                   | 0.108                                 | 0.014                  |                | 1007                                              | 129                   | 692                                               | 33                    | 1774                                                 | 234                   | 136                         | 61                         | r                 |
| 0.0699                                                | 0.0035                 | 1.065                              | 0.067                  | 0.1104                                | 0.0033                 |                | 736                                               | 33                    | 436                                               | 21                    | 1807                                                 | 54                    | 100                         | 67                         | r                 |
| 0.0588                                                | 0.0029                 | 1.04                               | 0.28                   | 0.128                                 | 0.023                  |                | 724                                               | 139                   | 368                                               | 18                    | 2075                                                 | 318                   | 112                         | 50                         | r                 |
| 0.1956                                                | 0.0098                 | 9.27                               | 1.71                   | 0.344                                 | 0.029                  |                | 2365                                              | 169                   | 1152                                              | 53                    | 3679                                                 | 129                   | 130                         | 84                         | r                 |
| <b>14. Amazon River, Brazil (2.2836°S, 56.3744°W)</b> |                        |                                    |                        |                                       |                        |                |                                                   |                       |                                                   |                       |                                                      |                       |                             |                            |                   |
| 0.00729                                               | 0.00031                | 0.0167                             | 0.0071                 | 0.0166                                | 0.0090                 | *              | 17                                                | 7                     | 47                                                | 2                     |                                                      |                       | 113                         | 68                         | r                 |
| 0.0481                                                | 0.0021                 | 0.143                              | 0.065                  | 0.022                                 | 0.014                  | 0.822          | 136                                               | 58                    | 303                                               | 13                    |                                                      |                       | 238                         | 102                        | r                 |
| 0.1345                                                | 0.0083                 | 0.45                               | 0.29                   | 0.024                                 | 0.028                  | 0.918          | 378                                               | 200                   | 813                                               | 47                    |                                                      |                       | 120                         | 78                         | r                 |
| 0.0525                                                | 0.0028                 | 0.18                               | 0.17                   | 0.024                                 | 0.035                  | 0.835          | 165                                               | 149                   | 330                                               | 17                    |                                                      |                       | 138                         | 86                         | r                 |
| 0.02398                                               | 0.00097                | 0.118                              | 0.011                  | 0.0358                                | 0.0041                 | 0.707          | 113                                               | 10                    | 153                                               | 6                     |                                                      |                       | 152                         | 91                         | a                 |
| 0.0735                                                | 0.0022                 | 0.371                              | 0.064                  | 0.0366                                | 0.0097                 | 0.877          | 320                                               | 47                    | 457                                               | 13                    |                                                      |                       | 123                         | 90                         | a                 |
| 0.1442                                                | 0.0056                 | 0.825                              | 0.062                  | 0.0415                                | 0.0040                 | 0.665          | 611                                               | 34                    | 869                                               | 31                    |                                                      |                       | 181                         | 71                         | a                 |
| 0.02567                                               | 0.00083                | 0.1513                             | 0.0100                 | 0.0427                                | 0.0033                 | 0.738          | 143                                               | 9                     | 163                                               | 5                     |                                                      |                       | 166                         | 91                         | a                 |
| 0.01157                                               | 0.00044                | 0.0684                             | 0.0043                 | 0.0429                                | 0.0028                 | 0.454          | 67                                                | 4                     | 74                                                | 3                     |                                                      |                       | 143                         | 62                         | a                 |
| 0.0258                                                | 0.0011                 | 0.171                              | 0.065                  | 0.048                                 | 0.023                  | 0.717          | 160                                               | 56                    | 164                                               | 7                     | 95                                                   | 1139                  | 110                         | 78                         | a                 |
| 0.01884                                               | 0.00058                | 0.1248                             | 0.0045                 | 0.0480                                | 0.0012                 | 0.782          | 119                                               | 4                     | 120                                               | 4                     | 99                                                   | 62                    | 125                         | 97                         | a                 |
| 0.0340                                                | 0.0012                 | 0.231                              | 0.030                  | 0.0491                                | 0.0083                 | 0.780          | 211                                               | 25                    | 216                                               | 8                     | 153                                                  | 354                   | 73                          | 64                         | a                 |
| 0.03113                                               | 0.00097                | 0.213                              | 0.013                  | 0.0496                                | 0.0036                 | 0.784          | 196                                               | 11                    | 198                                               | 6                     | 175                                                  | 161                   | 167                         | 101                        | a                 |
| 0.0657                                                | 0.0019                 | 0.450                              | 0.023                  | 0.0497                                | 0.0029                 | 0.898          | 377                                               | 16                    | 410                                               | 12                    | 181                                                  | 128                   | 151                         | 93                         | a                 |
| 0.0415                                                | 0.0022                 | 0.287                              | 0.019                  | 0.0502                                | 0.0029                 | 0.880          | 256                                               | 15                    | 262                                               | 13                    | 204                                                  | 127                   | 101                         | 52                         | a                 |
| 0.01882                                               | 0.00070                | 0.1308                             | 0.0072                 | 0.0504                                | 0.0027                 | 0.700          | 125                                               | 6                     | 120                                               | 4                     | 213                                                  | 121                   | 141                         | 67                         | a                 |
| 0.1175                                                | 0.0037                 | 0.838                              | 0.072                  | 0.0517                                | 0.0061                 | 0.931          | 618                                               | 40                    | 716                                               | 21                    | 272                                                  | 251                   | 153                         | 105                        | a                 |
| 0.0155                                                | 0.0032                 | 0.11                               | 0.11                   | 0.053                                 | 0.061                  | 0.556          | 108                                               | 103                   | 99                                                | 20                    | 311                                                  | 2656                  | 110                         | 72                         | a                 |
| 0.0560                                                | 0.0022                 | 0.407                              | 0.036                  | 0.0527                                | 0.0062                 | 0.863          | 346                                               | 26                    | 351                                               | 13                    | 315                                                  | 266                   | 135                         | 67                         | a                 |
| 0.1622                                                | 0.0056                 | 1.18                               | 0.21                   | 0.053                                 | 0.017                  | 0.932          | 791                                               | 96                    | 969                                               | 31                    | 318                                                  | 743                   | 170                         | 130                        | a                 |
| 0.0808                                                | 0.0025                 | 0.594                              | 0.028                  | 0.0533                                | 0.0027                 | 0.922          | 473                                               | 18                    | 501                                               | 15                    | 340                                                  | 114                   | 155                         | 90                         | a                 |
| 0.0341                                                | 0.0011                 | 0.251                              | 0.010                  | 0.0533                                | 0.0020                 | 0.846          | 227                                               | 8                     | 216                                               | 7                     | 340                                                  | 86                    | 146                         | 76                         | a                 |
| 0.01979                                               | 0.00080                | 0.1490                             | 0.0069                 | 0.0546                                | 0.0016                 | 0.817          | 141                                               | 6                     | 126                                               | 5                     | 396                                                  | 63                    | 120                         | 81                         | a                 |
| 0.0322                                                | 0.0011                 | 0.243                              | 0.012                  | 0.0547                                | 0.0027                 | 0.825          | 221                                               | 10                    | 204                                               | 7                     | 400                                                  | 109                   | 137                         | 60                         | a                 |
| 0.0780                                                | 0.0023                 | 0.593                              | 0.022                  | 0.0551                                | 0.0018                 | 0.632          | 473                                               | 14                    | 484                                               | 14                    | 416                                                  | 72                    | 109                         | 41                         | a                 |
| 0.0566                                                | 0.0043                 | 0.43                               | 0.27                   | 0.055                                 | 0.049                  | 0.858          | 365                                               | 194                   | 355                                               | 26                    | 428                                                  | 1269                  | 89                          | 74                         | a                 |
| 0.0521                                                | 0.0016                 | 0.398                              | 0.017                  | 0.0555                                | 0.0022                 | 0.896          | 340                                               | 12                    | 327                                               | 10                    | 432                                                  | 83                    | 100                         | 95                         | a                 |
| 0.00492                                               | 0.00022                | 0.0382                             | 0.0028                 | 0.0563                                | 0.0042                 | *              | 38                                                | 3                     | 32                                                | 1                     | 463                                                  | 165                   | 106                         | 78                         | a                 |
| 0.0383                                                | 0.0014                 | 0.299                              | 0.012                  | 0.0566                                | 0.0016                 | 0.894          | 266                                               | 10                    | 242                                               | 8                     | 475                                                  | 64                    | 117                         | 76                         | a                 |
| 0.0742                                                | 0.0021                 | 0.586                              | 0.021                  | 0.0572                                | 0.0017                 | 0.613          | 468                                               | 13                    | 462                                               | 13                    | 499                                                  | 65                    | 120                         | 82                         | a                 |
| 0.0697                                                | 0.0024                 | 0.555                              | 0.022                  | 0.0578                                | 0.0015                 | 0.712          | 449                                               | 14                    | 434                                               | 15                    | 523                                                  | 58                    | 110                         | 75                         | a                 |
| 0.0325                                                | 0.0011                 | 0.260                              | 0.018                  | 0.0580                                | 0.0046                 | 0.795          | 234                                               | 14                    | 206                                               | 7                     | 531                                                  | 174                   | 182                         | 96                         | a                 |
| 0.083                                                 | 0.010                  | 0.67                               | 0.29                   | 0.058                                 | 0.039                  | 0.892          | 519                                               | 176                   | 514                                               | 62                    | 539                                                  | 1465                  | 168                         | 66                         | a                 |
| 0.0693                                                | 0.0020                 | 0.561                              | 0.033                  | 0.0588                                | 0.0046                 | 0.887          | 452                                               | 21                    | 432                                               | 12                    | 558                                                  | 172                   | 170                         | 67                         | a                 |
| 0.0737                                                | 0.0026                 | 0.601                              | 0.025                  | 0.0591                                | 0.0017                 | 0.695          | 478                                               | 16                    | 459                                               | 16                    | 571                                                  | 64                    | 125                         | 56                         | a                 |
| 0.0435                                                | 0.0017                 | 0.357                              | 0.020                  | 0.0595                                | 0.0031                 | 0.875          | 310                                               | 15                    | 275                                               | 11                    | 585                                                  | 107                   | 87                          | 68                         | a                 |
| 0.0702                                                | 0.0030                 | 0.577                              | 0.027                  | 0.0596                                | 0.0016                 | 0.766          | 462                                               | 17                    | 437                                               | 18                    | 589                                                  | 54                    | 112                         | 66                         | a                 |
| 0.1824                                                | 0.0090                 | 1.50                               | 0.15                   | 0.060                                 | 0.011                  | 0.944          | 931                                               | 63                    | 1080                                              | 49                    | 591                                                  | 388                   | 208                         | 100                        | a                 |

| $^{206}\text{Pb}^*/^{238}\text{U}$ | $\pm 2\sigma$<br>(abs) | $^{207}\text{Pb}^*/^{235}\text{U}$ | $\pm 2\sigma$<br>(abs) | $^{207}\text{Pb}^*/^{206}\text{Pb}^*$ | $\pm 2\sigma$<br>(abs) | corr.<br>coef. | $^{206}\text{Pb}^*/^{238}\text{U}$<br>age<br>(Ma) | $\pm 2\sigma$<br>(Ma) | $^{207}\text{Pb}^*/^{235}\text{U}$<br>age<br>(Ma) | $\pm 2\sigma$<br>(Ma) | $^{207}\text{Pb}^*/^{206}\text{Pb}^*$<br>age<br>(Ma) | $\pm 2\sigma$<br>(Ma) | Length<br>( $\mu\text{m}$ ) | Width<br>( $\mu\text{m}$ ) | Accept/<br>Reject |
|------------------------------------|------------------------|------------------------------------|------------------------|---------------------------------------|------------------------|----------------|---------------------------------------------------|-----------------------|---------------------------------------------------|-----------------------|------------------------------------------------------|-----------------------|-----------------------------|----------------------------|-------------------|
| 0.0351                             | 0.0015                 | 0.289                              | 0.016                  | 0.0597                                | 0.0029                 | 0.855          | 258                                               | 13                    | 223                                               | 9                     | 593                                                  | 105                   | 110                         | 95                         | a                 |
| 0.0877                             | 0.0027                 | 0.729                              | 0.026                  | 0.0603                                | 0.0015                 | 0.747          | 556                                               | 15                    | 542                                               | 16                    | 614                                                  | 53                    | 94                          | 59                         | a                 |
| 0.1367                             | 0.0040                 | 1.16                               | 0.18                   | 0.061                                 | 0.018                  | 0.923          | 780                                               | 87                    | 826                                               | 23                    | 650                                                  | 618                   | 127                         | 100                        | a                 |
| 0.1091                             | 0.0053                 | 0.926                              | 0.092                  | 0.0616                                | 0.0079                 | 0.931          | 665                                               | 49                    | 667                                               | 31                    | 660                                                  | 251                   | 83                          | 63                         | a                 |
| 0.0957                             | 0.0038                 | 0.813                              | 0.036                  | 0.0616                                | 0.0018                 | 0.796          | 604                                               | 20                    | 589                                               | 23                    | 661                                                  | 62                    | 110                         | 60                         | a                 |
| 0.0795                             | 0.0024                 | 0.676                              | 0.032                  | 0.0617                                | 0.0031                 | 0.920          | 524                                               | 19                    | 493                                               | 14                    | 662                                                  | 109                   | 151                         | 101                        | a                 |
| 0.0442                             | 0.0018                 | 0.376                              | 0.025                  | 0.0617                                | 0.0044                 | 0.858          | 324                                               | 18                    | 279                                               | 11                    | 664                                                  | 154                   | 95                          | 65                         | a                 |
| 0.0432                             | 0.0024                 | 0.369                              | 0.030                  | 0.0619                                | 0.0050                 | 0.867          | 319                                               | 22                    | 273                                               | 15                    | 672                                                  | 174                   | 95                          | 97                         | a                 |
| 0.0580                             | 0.0041                 | 0.505                              | 0.080                  | 0.063                                 | 0.013                  | 0.875          | 415                                               | 54                    | 364                                               | 25                    | 712                                                  | 423                   | 101                         | 92                         | a                 |
| 0.0601                             | 0.0027                 | 0.525                              | 0.029                  | 0.0633                                | 0.0030                 | 0.917          | 428                                               | 20                    | 377                                               | 16                    | 718                                                  | 97                    | 103                         | 91                         | a                 |
| 0.0388                             | 0.0013                 | 0.341                              | 0.022                  | 0.0637                                | 0.0046                 | 0.830          | 298                                               | 16                    | 246                                               | 8                     | 732                                                  | 154                   | 175                         | 80                         | a                 |
| 0.1097                             | 0.0031                 | 0.979                              | 0.032                  | 0.0647                                | 0.0016                 | 0.769          | 693                                               | 16                    | 671                                               | 18                    | 765                                                  | 52                    | 110                         | 96                         | a                 |
| 0.0322                             | 0.0011                 | 0.288                              | 0.019                  | 0.0650                                | 0.0049                 | 0.796          | 257                                               | 15                    | 204                                               | 7                     | 775                                                  | 159                   | 132                         | 83                         | a                 |
| 0.0393                             | 0.0012                 | 0.354                              | 0.019                  | 0.0653                                | 0.0040                 | 0.836          | 308                                               | 14                    | 248                                               | 8                     | 786                                                  | 123                   | 167                         | 120                        | a                 |
| 0.0698                             | 0.0022                 | 0.629                              | 0.028                  | 0.0654                                | 0.0028                 | 0.918          | 496                                               | 17                    | 435                                               | 14                    | 787                                                  | 87                    | 155                         | 99                         | a                 |
| 0.0330                             | 0.0013                 | 0.301                              | 0.021                  | 0.0662                                | 0.0050                 | 0.809          | 267                                               | 16                    | 209                                               | 8                     | 814                                                  | 157                   | 171                         | 76                         | a                 |
| 0.1310                             | 0.0037                 | 1.201                              | 0.042                  | 0.0665                                | 0.0020                 | 0.760          | 801                                               | 19                    | 793                                               | 21                    | 822                                                  | 62                    | 97                          | 64                         | a                 |
| 0.1328                             | 0.0039                 | 1.235                              | 0.065                  | 0.0674                                | 0.0054                 | 0.933          | 816                                               | 30                    | 804                                               | 22                    | 851                                                  | 167                   | 108                         | 58                         | a                 |
| 0.1338                             | 0.0032                 | 1.248                              | 0.072                  | 0.0676                                | 0.0064                 | 0.928          | 822                                               | 32                    | 809                                               | 18                    | 858                                                  | 198                   | 207                         | 117                        | a                 |
| 0.1301                             | 0.0036                 | 1.214                              | 0.040                  | 0.0677                                | 0.0019                 | 0.775          | 807                                               | 18                    | 788                                               | 21                    | 859                                                  | 54                    | 141                         | 132                        | a                 |
| 0.1407                             | 0.0042                 | 1.328                              | 0.050                  | 0.0685                                | 0.0024                 | 0.754          | 858                                               | 22                    | 848                                               | 24                    | 882                                                  | 70                    | 120                         | 98                         | a                 |
| 0.1028                             | 0.0030                 | 0.971                              | 0.034                  | 0.0685                                | 0.0019                 | 0.719          | 689                                               | 17                    | 631                                               | 18                    | 884                                                  | 57                    | 144                         | 84                         | a                 |
| 0.0451                             | 0.0017                 | 0.429                              | 0.029                  | 0.0691                                | 0.0052                 | 0.855          | 363                                               | 20                    | 284                                               | 11                    | 900                                                  | 149                   | 252                         | 57                         | a                 |
| 0.1101                             | 0.0054                 | 1.049                              | 0.063                  | 0.0691                                | 0.0035                 | 0.705          | 728                                               | 31                    | 673                                               | 32                    | 901                                                  | 106                   | 85                          | 55                         | a                 |
| 0.1250                             | 0.0036                 | 1.191                              | 0.043                  | 0.0691                                | 0.0023                 | 0.709          | 796                                               | 20                    | 759                                               | 20                    | 902                                                  | 67                    | 150                         | 78                         | a                 |
| 0.1096                             | 0.0039                 | 1.058                              | 0.043                  | 0.0700                                | 0.0021                 | 0.764          | 733                                               | 21                    | 671                                               | 23                    | 928                                                  | 61                    | 127                         | 109                        | a                 |
| 0.0563                             | 0.0017                 | 0.545                              | 0.024                  | 0.0703                                | 0.0030                 | 0.898          | 442                                               | 16                    | 353                                               | 11                    | 936                                                  | 88                    | 100                         | 60                         | a                 |
| 0.1462                             | 0.0040                 | 1.418                              | 0.047                  | 0.0703                                | 0.0020                 | 0.779          | 896                                               | 20                    | 879                                               | 22                    | 937                                                  | 59                    | 152                         | 75                         | a                 |
| 0.1081                             | 0.0031                 | 1.051                              | 0.036                  | 0.0706                                | 0.0020                 | 0.716          | 730                                               | 18                    | 662                                               | 18                    | 945                                                  | 57                    | 86                          | 80                         | a                 |
| 0.1381                             | 0.0087                 | 1.359                              | 0.089                  | 0.0713                                | 0.0025                 | 0.878          | 871                                               | 39                    | 834                                               | 49                    | 967                                                  | 71                    | 130                         | 68                         | a                 |
| 0.1285                             | 0.0035                 | 1.264                              | 0.041                  | 0.0713                                | 0.0018                 | 0.775          | 830                                               | 18                    | 779                                               | 20                    | 967                                                  | 51                    | 161                         | 108                        | a                 |
| 0.1537                             | 0.0036                 | 1.515                              | 0.068                  | 0.0715                                | 0.0051                 | 0.939          | 937                                               | 27                    | 922                                               | 20                    | 972                                                  | 146                   | 133                         | 100                        | a                 |
| 0.1107                             | 0.0031                 | 1.099                              | 0.036                  | 0.0720                                | 0.0018                 | 0.741          | 753                                               | 17                    | 677                                               | 18                    | 987                                                  | 51                    | 125                         | 110                        | a                 |
| 0.0724                             | 0.0023                 | 0.727                              | 0.029                  | 0.0728                                | 0.0025                 | 0.931          | 555                                               | 17                    | 451                                               | 14                    | 1009                                                 | 70                    | 65                          | 65                         | a                 |
| 0.1450                             | 0.0040                 | 1.461                              | 0.047                  | 0.0730                                | 0.0019                 | 0.791          | 914                                               | 20                    | 873                                               | 22                    | 1014                                                 | 53                    | 78                          | 60                         | a                 |
| 0.1711                             | 0.0059                 | 1.734                              | 0.069                  | 0.0735                                | 0.0022                 | 0.838          | 1021                                              | 26                    | 1018                                              | 32                    | 1028                                                 | 61                    | 130                         | 75                         | a                 |
| 0.1207                             | 0.0045                 | 1.226                              | 0.051                  | 0.0737                                | 0.0019                 | 0.814          | 813                                               | 23                    | 735                                               | 26                    | 1033                                                 | 53                    | 87                          | 83                         | a                 |
| 0.0466                             | 0.0018                 | 0.474                              | 0.037                  | 0.0738                                | 0.0069                 | 0.851          | 394                                               | 25                    | 294                                               | 11                    | 1035                                                 | 178                   |                             |                            | r                 |
| 0.1489                             | 0.0047                 | 1.521                              | 0.058                  | 0.0741                                | 0.0024                 | 0.772          | 939                                               | 23                    | 895                                               | 26                    | 1044                                                 | 65                    | 127                         | 87                         | a                 |
| 0.1598                             | 0.0044                 | 1.636                              | 0.053                  | 0.0742                                | 0.0019                 | 0.818          | 984                                               | 20                    | 956                                               | 25                    | 1047                                                 | 51                    | 102                         | 92                         | a                 |
| 0.1409                             | 0.0051                 | 1.444                              | 0.058                  | 0.0743                                | 0.0019                 | 0.842          | 907                                               | 24                    | 850                                               | 29                    | 1050                                                 | 52                    | 121                         | 74                         | a                 |
| 0.0638                             | 0.0059                 | 0.658                              | 0.077                  | 0.0748                                | 0.0075                 | 0.922          | 513                                               | 47                    | 399                                               | 36                    | 1063                                                 | 189                   | 138                         | 68                         | a                 |
| 0.0506                             | 0.0043                 | 0.529                              | 0.056                  | 0.0757                                | 0.0067                 | 0.905          | 431                                               | 37                    | 318                                               | 27                    | 1088                                                 | 176                   | 113                         | 63                         | r                 |
| 0.1511                             | 0.0036                 | 1.58                               | 0.11                   | 0.0758                                | 0.0093                 | 0.932          | 962                                               | 43                    | 907                                               | 20                    | 1089                                                 | 245                   | 172                         | 73                         | a                 |
| 0.1687                             | 0.0053                 | 1.769                              | 0.064                  | 0.0760                                | 0.0020                 | 0.835          | 1034                                              | 23                    | 1005                                              | 29                    | 1096                                                 | 54                    | 135                         | 85                         | a                 |
| 0.1659                             | 0.0077                 | 1.741                              | 0.089                  | 0.0761                                | 0.0025                 | 0.860          | 1024                                              | 33                    | 989                                               | 42                    | 1098                                                 | 66                    | 127                         | 62                         | a                 |
| 0.1425                             | 0.0055                 | 1.511                              | 0.064                  | 0.0769                                | 0.0019                 | 0.850          | 935                                               | 26                    | 859                                               | 31                    | 1119                                                 | 50                    | 133                         | 100                        | a                 |
| 0.1144                             | 0.0077                 | 1.215                              | 0.091                  | 0.0770                                | 0.0037                 | 0.792          | 808                                               | 42                    | 698                                               | 44                    | 1121                                                 | 93                    | 92                          | 62                         | a                 |
| 0.1775                             | 0.0088                 | 1.886                              | 0.100                  | 0.0771                                | 0.0021                 | 0.898          | 1076                                              | 35                    | 1053                                              | 48                    | 1124                                                 | 53                    | 138                         | 101                        | a                 |
| 0.1329                             | 0.0067                 | 1.412                              | 0.077                  | 0.0771                                | 0.0024                 | 0.847          | 894                                               | 32                    | 804                                               | 38                    | 1123                                                 | 62                    | 110                         | 76                         | a                 |
| 0.1747                             | 0.0051                 | 1.861                              | 0.063                  | 0.0773                                | 0.0020                 | 0.829          | 1067                                              | 22                    | 1038                                              | 28                    | 1128                                                 | 53                    | 155                         | 100                        | a                 |

| $^{206}\text{Pb}^*/^{238}\text{U}$ | $\pm 2\sigma$<br>(abs) | $^{207}\text{Pb}^*/^{235}\text{U}$ | $\pm 2\sigma$<br>(abs) | $^{207}\text{Pb}^*/^{206}\text{Pb}^*$ | $\pm 2\sigma$<br>(abs) | corr.<br>coef. | $^{206}\text{Pb}^*/^{238}\text{U}$<br>age<br>(Ma) | $\pm 2\sigma$<br>(Ma) | $^{207}\text{Pb}^*/^{235}\text{U}$<br>age<br>(Ma) | $\pm 2\sigma$<br>(Ma) | $^{207}\text{Pb}^*/^{206}\text{Pb}^*$<br>age<br>(Ma) | $\pm 2\sigma$<br>(Ma) | Length<br>( $\mu\text{m}$ ) | Width<br>( $\mu\text{m}$ ) | Accept/<br>Reject |
|------------------------------------|------------------------|------------------------------------|------------------------|---------------------------------------|------------------------|----------------|---------------------------------------------------|-----------------------|---------------------------------------------------|-----------------------|------------------------------------------------------|-----------------------|-----------------------------|----------------------------|-------------------|
| 0.1493                             | 0.0040                 | 1.591                              | 0.050                  | 0.0773                                | 0.0019                 | 0.792          | 967                                               | 20                    | 897                                               | 23                    | 1129                                                 | 50                    | 141                         | 80                         | a                 |
| 0.1465                             | 0.0040                 | 1.564                              | 0.050                  | 0.0774                                | 0.0020                 | 0.785          | 956                                               | 20                    | 881                                               | 22                    | 1132                                                 | 51                    | 155                         | 112                        | a                 |
| 0.0261                             | 0.0029                 | 0.28                               | 0.34                   | 0.08                                  | 0.12                   | 0.721          | 251                                               | 269                   | 166                                               | 18                    | 1146                                                 | 3043                  | 180                         | 110                        | a                 |
| 0.1334                             | 0.0056                 | 1.446                              | 0.070                  | 0.0786                                | 0.0027                 | 0.791          | 908                                               | 29                    | 807                                               | 32                    | 1162                                                 | 69                    | 97                          | 90                         | a                 |
| 0.1359                             | 0.0039                 | 1.474                              | 0.053                  | 0.0787                                | 0.0025                 | 0.713          | 920                                               | 22                    | 821                                               | 22                    | 1164                                                 | 64                    | 97                          | 91                         | a                 |
| 0.1219                             | 0.0056                 | 1.334                              | 0.083                  | 0.0794                                | 0.0049                 | 0.582          | 861                                               | 36                    | 741                                               | 32                    | 1182                                                 | 118                   | 180                         | 103                        | a                 |
| 0.1342                             | 0.0039                 | 1.473                              | 0.050                  | 0.0796                                | 0.0020                 | 0.780          | 919                                               | 20                    | 812                                               | 22                    | 1188                                                 | 49                    | 164                         | 116                        | a                 |
| 0.1740                             | 0.0050                 | 1.912                              | 0.064                  | 0.0797                                | 0.0021                 | 0.823          | 1085                                              | 22                    | 1034                                              | 27                    | 1189                                                 | 51                    | 135                         | 54                         | a                 |
| 0.1354                             | 0.0072                 | 1.500                              | 0.084                  | 0.0803                                | 0.0022                 | 0.867          | 930                                               | 34                    | 819                                               | 41                    | 1204                                                 | 55                    | 80                          | 65                         | a                 |
| 0.1432                             | 0.0041                 | 1.591                              | 0.062                  | 0.0806                                | 0.0032                 | 0.646          | 967                                               | 24                    | 863                                               | 23                    | 1211                                                 | 75                    | 99                          | 68                         | a                 |
| 0.1338                             | 0.0056                 | 1.51                               | 0.10                   | 0.0818                                | 0.0065                 | 0.948          | 934                                               | 41                    | 810                                               | 32                    | 1241                                                 | 148                   | 124                         | 75                         | a                 |
| 0.1680                             | 0.0050                 | 1.902                              | 0.065                  | 0.0821                                | 0.0021                 | 0.818          | 1082                                              | 23                    | 1001                                              | 28                    | 1248                                                 | 51                    | 83                          | 78                         | a                 |
| 0.1953                             | 0.0063                 | 2.212                              | 0.087                  | 0.0822                                | 0.0028                 | 0.809          | 1185                                              | 28                    | 1150                                              | 34                    | 1249                                                 | 68                    | 100                         | 60                         | a                 |
| 0.0313                             | 0.0010                 | 0.357                              | 0.032                  | 0.0827                                | 0.0095                 | 0.769          | 310                                               | 24                    | 199                                               | 6                     | 1262                                                 | 209                   | 188                         | 105                        | r                 |
| 0.1526                             | 0.0064                 | 1.742                              | 0.083                  | 0.0828                                | 0.0027                 | 0.819          | 1024                                              | 31                    | 916                                               | 36                    | 1265                                                 | 64                    | 136                         | 68                         | a                 |
| 0.00370                            | 0.00036                | 0.0423                             | 0.0073                 | 0.083                                 | 0.015                  | *              | 42                                                | 7                     | 24                                                | 2                     | 1270                                                 | 357                   | 122                         | 98                         | r                 |
| 0.1413                             | 0.0039                 | 1.617                              | 0.053                  | 0.0830                                | 0.0022                 | 0.749          | 977                                               | 20                    | 852                                               | 22                    | 1269                                                 | 52                    | 130                         | 65                         | a                 |
| 0.1669                             | 0.0046                 | 1.919                              | 0.063                  | 0.0834                                | 0.0023                 | 0.786          | 1088                                              | 22                    | 995                                               | 25                    | 1279                                                 | 53                    | 80                          | 75                         | a                 |
| 0.1328                             | 0.0038                 | 1.546                              | 0.053                  | 0.0844                                | 0.0024                 | 0.724          | 949                                               | 21                    | 804                                               | 21                    | 1302                                                 | 53                    | 124                         | 90                         | a                 |
| 0.287                              | 0.012                  | 3.35                               | 0.15                   | 0.0845                                | 0.0022                 | 0.919          | 1492                                              | 35                    | 1628                                              | 58                    | 1304                                                 | 52                    | 80                          | 65                         | a                 |
| 0.1790                             | 0.0048                 | 2.097                              | 0.066                  | 0.0849                                | 0.0021                 | 0.810          | 1148                                              | 22                    | 1062                                              | 26                    | 1314                                                 | 49                    | 120                         | 82                         | a                 |
| 0.155                              | 0.011                  | 1.82                               | 0.17                   | 0.0856                                | 0.0089                 | 0.637          | 1054                                              | 60                    | 926                                               | 63                    | 1330                                                 | 200                   | 137                         | 91                         | a                 |
| 0.0267                             | 0.0024                 | 0.320                              | 0.037                  | 0.0868                                | 0.0085                 | 0.820          | 282                                               | 29                    | 170                                               | 15                    | 1356                                                 | 189                   | 130                         | 107                        | r                 |
| 0.1675                             | 0.0047                 | 2.006                              | 0.075                  | 0.0868                                | 0.0032                 | 0.693          | 1118                                              | 25                    | 998                                               | 26                    | 1357                                                 | 72                    | 102                         | 62                         | a                 |
| 0.1460                             | 0.0052                 | 1.750                              | 0.084                  | 0.0869                                | 0.0042                 | 0.620          | 1027                                              | 31                    | 879                                               | 29                    | 1359                                                 | 93                    | 124                         | 71                         | a                 |
| 0.2095                             | 0.0061                 | 2.524                              | 0.088                  | 0.0874                                | 0.0025                 | 0.824          | 1279                                              | 25                    | 1226                                              | 32                    | 1369                                                 | 54                    | 114                         | 60                         | a                 |
| 0.2258                             | 0.0045                 | 2.722                              | 0.073                  | 0.0874                                | 0.0033                 | 0.661          | 1334                                              | 20                    | 1312                                              | 23                    | 1370                                                 | 73                    | 113                         | 90                         | a                 |
| 0.1178                             | 0.0043                 | 1.423                              | 0.070                  | 0.0876                                | 0.0042                 | 0.522          | 898                                               | 29                    | 718                                               | 25                    | 1374                                                 | 89                    | 97                          | 73                         | a                 |
| 0.1757                             | 0.0047                 | 2.138                              | 0.068                  | 0.0883                                | 0.0022                 | 0.800          | 1161                                              | 22                    | 1043                                              | 26                    | 1389                                                 | 47                    | 214                         | 57                         | a                 |
| 0.1845                             | 0.0056                 | 2.254                              | 0.080                  | 0.0886                                | 0.0025                 | 0.812          | 1198                                              | 25                    | 1091                                              | 30                    | 1396                                                 | 53                    | 140                         | 88                         | a                 |
| 0.337                              | 0.013                  | 4.18                               | 0.21                   | 0.0898                                | 0.0064                 | 0.797          | 1669                                              | 42                    | 1875                                              | 65                    | 1420                                                 | 137                   | 125                         | 98                         | a                 |
| 0.1626                             | 0.0049                 | 2.039                              | 0.080                  | 0.0909                                | 0.0044                 | 0.566          | 1128                                              | 27                    | 971                                               | 27                    | 1445                                                 | 93                    | 122                         | 80                         | a                 |
| 0.1718                             | 0.0047                 | 2.154                              | 0.100                  | 0.0909                                | 0.0051                 | 0.958          | 1166                                              | 32                    | 1022                                              | 26                    | 1445                                                 | 104                   | 98                          | 78                         | a                 |
| 0.1564                             | 0.0040                 | 1.975                              | 0.057                  | 0.0916                                | 0.0024                 | 0.738          | 1107                                              | 19                    | 937                                               | 22                    | 1459                                                 | 49                    | 112                         | 97                         | a                 |
| 0.2091                             | 0.0089                 | 2.64                               | 0.15                   | 0.0917                                | 0.0074                 | 0.609          | 1313                                              | 43                    | 1224                                              | 47                    | 1461                                                 | 154                   | 167                         | 67                         | a                 |
| 0.2157                             | 0.0066                 | 2.753                              | 0.098                  | 0.0926                                | 0.0024                 | 0.846          | 1343                                              | 26                    | 1259                                              | 35                    | 1480                                                 | 48                    | 165                         | 84                         | a                 |
| 0.2567                             | 0.0099                 | 3.31                               | 0.14                   | 0.0934                                | 0.0024                 | 0.900          | 1482                                              | 33                    | 1473                                              | 51                    | 1496                                                 | 47                    | 150                         | 50                         | a                 |
| 0.331                              | 0.015                  | 4.28                               | 0.28                   | 0.0939                                | 0.0095                 | 0.732          | 1690                                              | 53                    | 1843                                              | 75                    | 1506                                                 | 191                   | 122                         | 68                         | a                 |
| 0.2207                             | 0.0061                 | 2.86                               | 0.29                   | 0.094                                 | 0.019                  | 0.947          | 1371                                              | 76                    | 1285                                              | 32                    | 1508                                                 | 379                   | 128                         | 68                         | a                 |
| 0.1854                             | 0.0054                 | 2.418                              | 0.083                  | 0.0946                                | 0.0025                 | 0.803          | 1248                                              | 25                    | 1097                                              | 30                    | 1520                                                 | 50                    | 106                         | 70                         | a                 |
| 0.00788                            | 0.00038                | 0.105                              | 0.015                  | 0.096                                 | 0.017                  | *              | 101                                               | 14                    | 51                                                | 2                     | 1556                                                 | 291                   | 100                         | 76                         | r                 |
| 0.0531                             | 0.0023                 | 0.713                              | 0.077                  | 0.097                                 | 0.013                  | 0.862          | 547                                               | 46                    | 333                                               | 14                    | 1576                                                 | 258                   | 136                         | 81                         | r                 |
| 0.00375                            | 0.00027                | 0.0512                             | 0.0080                 | 0.099                                 | 0.017                  | *              | 51                                                | 8                     | 24                                                | 2                     | 1603                                                 | 329                   | 107                         | 83                         | r                 |
| 0.1188                             | 0.0045                 | 1.64                               | 0.24                   | 0.100                                 | 0.025                  | 0.916          | 986                                               | 94                    | 724                                               | 26                    | 1626                                                 | 472                   | 114                         | 68                         | r                 |
| 0.2871                             | 0.0066                 | 4.00                               | 0.16                   | 0.1011                                | 0.0074                 | 0.963          | 1634                                              | 33                    | 1627                                              | 33                    | 1644                                                 | 135                   | 164                         | 70                         | a                 |
| 0.1688                             | 0.0064                 | 2.40                               | 0.37                   | 0.103                                 | 0.030                  | 0.935          | 1242                                              | 110                   | 1005                                              | 36                    | 1679                                                 | 530                   | 88                          | 88                         | a                 |
| 0.0190                             | 0.0029                 | 0.271                              | 0.042                  | 0.1037                                | 0.0052                 | 0.901          | 244                                               | 34                    | 121                                               | 18                    | 1691                                                 | 91                    | 103                         | 63                         | r                 |
| 0.2262                             | 0.0065                 | 3.25                               | 0.11                   | 0.1043                                | 0.0026                 | 0.832          | 1470                                              | 26                    | 1315                                              | 34                    | 1702                                                 | 45                    | 140                         | 57                         | a                 |
| 0.2226                             | 0.0097                 | 3.27                               | 0.16                   | 0.1065                                | 0.0031                 | 0.866          | 1473                                              | 37                    | 1295                                              | 51                    | 1740                                                 | 53                    | 135                         | 66                         | a                 |
| 0.2191                             | 0.0065                 | 3.23                               | 0.11                   | 0.1070                                | 0.0028                 | 0.823          | 1465                                              | 27                    | 1277                                              | 35                    | 1749                                                 | 47                    | 91                          | 81                         | a                 |
| 0.2382                             | 0.0071                 | 3.53                               | 0.12                   | 0.1073                                | 0.0029                 | 0.831          | 1533                                              | 28                    | 1378                                              | 37                    | 1754                                                 | 48                    | 144                         | 88                         | a                 |

| $^{206}\text{Pb}^*/^{238}\text{U}$                    | $\pm 2\sigma$<br>(abs) | $^{207}\text{Pb}^*/^{235}\text{U}$ | $\pm 2\sigma$<br>(abs) | $^{207}\text{Pb}^*/^{206}\text{Pb}^*$ | $\pm 2\sigma$<br>(abs) | corr.<br>coef. | $^{206}\text{Pb}^*/^{238}\text{U}$<br>age<br>(Ma) | $\pm 2\sigma$<br>(Ma) | $^{207}\text{Pb}^*/^{235}\text{U}$<br>age<br>(Ma) | $\pm 2\sigma$<br>(Ma) | $^{207}\text{Pb}^*/^{206}\text{Pb}^*$<br>age<br>(Ma) | $\pm 2\sigma$<br>(Ma) | Length<br>( $\mu\text{m}$ ) | Width<br>( $\mu\text{m}$ ) | Accept/<br>Reject |
|-------------------------------------------------------|------------------------|------------------------------------|------------------------|---------------------------------------|------------------------|----------------|---------------------------------------------------|-----------------------|---------------------------------------------------|-----------------------|------------------------------------------------------|-----------------------|-----------------------------|----------------------------|-------------------|
| 0.327                                                 | 0.013                  | 4.96                               | 0.25                   | 0.1100                                | 0.0079                 | 0.742          | 1812                                              | 43                    | 1823                                              | 64                    | 1799                                                 | 131                   | 124                         | 80                         | a                 |
| 0.1999                                                | 0.0057                 | 3.03                               | 0.10                   | 0.1100                                | 0.0029                 | 0.787          | 1416                                              | 25                    | 1175                                              | 30                    | 1799                                                 | 47                    | 106                         | 73                         | a                 |
| 0.2664                                                | 0.0085                 | 4.17                               | 0.15                   | 0.1136                                | 0.0029                 | 0.858          | 1668                                              | 30                    | 1522                                              | 43                    | 1857                                                 | 46                    | 83                          | 58                         | a                 |
| 0.2728                                                | 0.0097                 | 4.28                               | 0.17                   | 0.1138                                | 0.0029                 | 0.878          | 1690                                              | 33                    | 1555                                              | 49                    | 1861                                                 | 45                    | 140                         | 70                         | a                 |
| 0.0607                                                | 0.0027                 | 0.95                               | 0.16                   | 0.114                                 | 0.028                  | 0.862          | 680                                               | 85                    | 380                                               | 16                    | 1864                                                 | 450                   | 180                         | 67                         | r                 |
| 0.2505                                                | 0.0072                 | 3.97                               | 0.14                   | 0.1151                                | 0.0030                 | 0.826          | 1629                                              | 28                    | 1441                                              | 37                    | 1881                                                 | 48                    | 118                         | 106                        | a                 |
| 0.2416                                                | 0.0071                 | 3.84                               | 0.15                   | 0.1152                                | 0.0044                 | 0.731          | 1601                                              | 32                    | 1395                                              | 37                    | 1884                                                 | 69                    | 110                         | 77                         | a                 |
| 0.2072                                                | 0.0062                 | 3.29                               | 0.11                   | 0.1153                                | 0.0030                 | 0.795          | 1479                                              | 27                    | 1214                                              | 33                    | 1884                                                 | 47                    | 93                          | 68                         | a                 |
| 0.1476                                                | 0.0064                 | 2.38                               | 0.42                   | 0.117                                 | 0.037                  | 0.929          | 1236                                              | 125                   | 888                                               | 36                    | 1909                                                 | 568                   | 124                         | 72                         | r                 |
| 0.2435                                                | 0.0069                 | 4.00                               | 0.18                   | 0.1190                                | 0.0088                 | 0.960          | 1634                                              | 36                    | 1405                                              | 36                    | 1942                                                 | 132                   | 107                         | 76                         | a                 |
| 0.3384                                                | 0.0070                 | 5.71                               | 0.15                   | 0.1224                                | 0.0044                 | 0.729          | 1933                                              | 23                    | 1879                                              | 34                    | 1991                                                 | 64                    | 93                          | 87                         | a                 |
| 0.0813                                                | 0.0050                 | 1.381                              | 0.091                  | 0.1233                                | 0.0042                 | 0.604          | 881                                               | 39                    | 504                                               | 30                    | 2005                                                 | 59                    | 130                         | 78                         | r                 |
| 0.207                                                 | 0.018                  | 3.56                               | 0.31                   | 0.1247                                | 0.0033                 | 0.924          | 1541                                              | 70                    | 1215                                              | 95                    | 2024                                                 | 47                    | 113                         | 94                         | a                 |
| 0.0512                                                | 0.0066                 | 0.91                               | 0.13                   | 0.128                                 | 0.013                  | 0.921          | 655                                               | 72                    | 322                                               | 40                    | 2075                                                 | 172                   | 106                         | 98                         | r                 |
| 0.2638                                                | 0.0084                 | 4.75                               | 0.17                   | 0.1306                                | 0.0033                 | 0.839          | 1776                                              | 30                    | 1509                                              | 43                    | 2106                                                 | 44                    | 74                          | 67                         | a                 |
| 0.2351                                                | 0.0073                 | 4.58                               | 0.17                   | 0.1413                                | 0.0040                 | 0.770          | 1746                                              | 31                    | 1361                                              | 38                    | 2243                                                 | 48                    | 169                         | 124                        | a                 |
| 0.3043                                                | 0.0059                 | 6.05                               | 0.15                   | 0.1442                                | 0.0054                 | 0.567          | 1983                                              | 22                    | 1713                                              | 29                    | 2279                                                 | 64                    | 151                         | 88                         | a                 |
| 0.0406                                                | 0.0014                 | 0.886                              | 0.041                  | 0.1583                                | 0.0065                 | 0.874          | 644                                               | 22                    | 256                                               | 9                     | 2438                                                 | 69                    | 125                         | 102                        | r                 |
| 0.1437                                                | 0.0063                 | 3.39                               | 0.41                   | 0.171                                 | 0.036                  | 0.930          | 1502                                              | 94                    | 865                                               | 36                    | 2567                                                 | 347                   | 120                         | 94                         | r                 |
| 0.2068                                                | 0.0064                 | 4.91                               | 0.18                   | 0.1722                                | 0.0046                 | 0.689          | 1804                                              | 30                    | 1212                                              | 34                    | 2579                                                 | 44                    | 120                         | 89                         | r                 |
| 0.0146                                                | 0.0022                 | 0.348                              | 0.067                  | 0.173                                 | 0.028                  | 0.668          | 303                                               | 51                    | 93                                                | 14                    | 2589                                                 | 247                   | 139                         | 80                         | r                 |
| 0.341                                                 | 0.011                  | 8.50                               | 0.31                   | 0.1810                                | 0.0045                 | 0.828          | 2286                                              | 33                    | 1890                                              | 51                    | 2662                                                 | 41                    | 99                          | 76                         | a                 |
| 0.0588                                                | 0.0043                 | 1.52                               | 0.12                   | 0.1882                                | 0.0075                 | 0.950          | 940                                               | 48                    | 368                                               | 26                    | 2726                                                 | 66                    | 167                         | 98                         | r                 |
| 0.1090                                                | 0.0042                 | 2.88                               | 0.34                   | 0.192                                 | 0.031                  | 0.926          | 1377                                              | 89                    | 667                                               | 25                    | 2757                                                 | 246                   | 199                         | 122                        | r                 |
| 0.4183                                                | 0.0088                 | 11.08                              | 0.27                   | 0.1920                                | 0.0053                 | 0.749          | 2530                                              | 23                    | 2253                                              | 40                    | 2760                                                 | 45                    | 103                         | 87                         | a                 |
| 0.324                                                 | 0.013                  | 9.65                               | 0.43                   | 0.2164                                | 0.0055                 | 0.828          | 2402                                              | 41                    | 1807                                              | 63                    | 2954                                                 | 40                    | 99                          | 57                         | r                 |
| 0.135                                                 | 0.015                  | 4.69                               | 0.70                   | 0.252                                 | 0.039                  | 0.955          | 1765                                              | 126                   | 817                                               | 83                    | 3195                                                 | 227                   | 163                         | 84                         | r                 |
| 0.0498                                                | 0.0016                 | 1.76                               | 0.23                   | 0.257                                 | 0.044                  | 0.846          | 1032                                              | 83                    | 313                                               | 10                    | 3229                                                 | 247                   | 131                         | 82                         | r                 |
| 0.0946                                                | 0.0095                 | 4.17                               | 0.60                   | 0.320                                 | 0.047                  | 0.936          | 1669                                              | 117                   | 583                                               | 56                    | 3569                                                 | 211                   | 143                         | 121                        | r                 |
| 0.149                                                 | 0.026                  | 7.31                               | 1.68                   | 0.355                                 | 0.079                  | 0.962          | 2150                                              | 205                   | 896                                               | 147                   | 3730                                                 | 304                   | 125                         | 92                         | r                 |
| 0.213                                                 | 0.017                  | 10.69                              | 1.43                   | 0.364                                 | 0.057                  | 0.968          | 2497                                              | 124                   | 1244                                              | 92                    | 3768                                                 | 238                   | 122                         | 110                        | r                 |
| <b>15. Amazon River, Brazil (2.4326°S, 54.3715°W)</b> |                        |                                    |                        |                                       |                        |                |                                                   |                       |                                                   |                       |                                                      |                       |                             |                            |                   |
| 0.04683                                               | 0.00093                | 0.2254                             | 0.0086                 | 0.0349                                | 0.0024                 | 0.778          | 206                                               | 7                     | 295                                               | 6                     |                                                      |                       | 85                          | 78                         | r                 |
| 0.01526                                               | 0.00050                | 0.0937                             | 0.0093                 | 0.0446                                | 0.0092                 | 0.042          | 91                                                | 9                     | 98                                                | 3                     |                                                      |                       | 133                         | 54                         | a                 |
| 0.0314                                                | 0.0012                 | 0.049                              | 0.010                  | 0.0113                                | 0.0048                 | 0.538          | 48                                                | 10                    | 200                                               | 7                     |                                                      |                       | 99                          | 46                         | r                 |
| 0.0536                                                | 0.0013                 | 0.333                              | 0.012                  | 0.0450                                | 0.0018                 | 0.887          | 292                                               | 9                     | 336                                               | 8                     |                                                      |                       | 102                         | 56                         | a                 |
| 0.03777                                               | 0.00080                | 0.211                              | 0.015                  | 0.0405                                | 0.0052                 | 0.728          | 194                                               | 13                    | 239                                               | 5                     |                                                      |                       | 144                         | 81                         | a                 |
| 0.0937                                                | 0.0021                 | 0.679                              | 0.019                  | 0.0526                                | 0.0017                 | 0.618          | 526                                               | 12                    | 578                                               | 12                    | 310                                                  | 72                    |                             |                            | a                 |
| 0.0927                                                | 0.0021                 | 0.681                              | 0.021                  | 0.0533                                | 0.0020                 | 0.504          | 527                                               | 13                    | 572                                               | 12                    | 340                                                  | 85                    | 136                         | 87                         | a                 |
| 0.0109                                                | 0.0011                 | 0.199                              | 0.022                  | 0.1332                                | 0.0063                 | 0.769          | 185                                               | 18                    | 70                                                | 7                     | 2140                                                 | 83                    | 75                          | 60                         | r                 |
| 0.0879                                                | 0.0019                 | 0.610                              | 0.022                  | 0.0503                                | 0.0021                 | 0.923          | 483                                               | 14                    | 543                                               | 12                    | 210                                                  | 97                    | 145                         | 67                         | a                 |
| 0.0961                                                | 0.0022                 | 0.573                              | 0.023                  | 0.0432                                | 0.0025                 | 0.913          | 460                                               | 15                    | 592                                               | 13                    |                                                      |                       | 137                         | 90                         | a                 |
| 0.0980                                                | 0.0024                 | 0.703                              | 0.025                  | 0.0520                                | 0.0022                 | 0.510          | 541                                               | 15                    | 603                                               | 14                    | 287                                                  | 99                    | 124                         | 97                         | a                 |
| 0.0708                                                | 0.0018                 | 0.479                              | 0.026                  | 0.0490                                | 0.0036                 | 0.887          | 397                                               | 18                    | 441                                               | 11                    | 149                                                  | 172                   | 125                         | 113                        | a                 |
| 0.0980                                                | 0.0031                 | 0.760                              | 0.028                  | 0.0563                                | 0.0018                 | 0.740          | 574                                               | 16                    | 603                                               | 18                    | 463                                                  | 70                    | 117                         | 52                         | a                 |
| 0.0796                                                | 0.0032                 | 0.610                              | 0.028                  | 0.0556                                | 0.0018                 | 0.751          | 483                                               | 17                    | 493                                               | 19                    | 436                                                  | 71                    | 129                         | 53                         | a                 |
| 0.0937                                                | 0.0021                 | 0.736                              | 0.028                  | 0.0569                                | 0.0031                 | 0.909          | 560                                               | 16                    | 577                                               | 12                    | 489                                                  | 122                   | 111                         | 52                         | a                 |
| 0.0938                                                | 0.0025                 | 0.731                              | 0.030                  | 0.0565                                | 0.0028                 | 0.924          | 557                                               | 17                    | 578                                               | 15                    | 473                                                  | 109                   | 120                         | 72                         | a                 |
| 0.0940                                                | 0.0025                 | 0.738                              | 0.037                  | 0.0570                                | 0.0041                 | 0.911          | 561                                               | 22                    | 579                                               | 15                    | 491                                                  | 160                   | 96                          | 87                         | a                 |
| 0.1046                                                | 0.0040                 | 0.876                              | 0.039                  | 0.0607                                | 0.0025                 | 0.719          | 639                                               | 21                    | 642                                               | 23                    | 630                                                  | 88                    | 96                          | 80                         | a                 |
| 0.0771                                                | 0.0037                 | 0.511                              | 0.040                  | 0.0481                                | 0.0046                 | 0.906          | 419                                               | 27                    | 479                                               | 22                    | 103                                                  | 227                   | 45                          | 35                         | a                 |

| $^{206}\text{Pb}^*/^{238}\text{U}$ | $\pm 2\sigma$<br>(abs) | $^{207}\text{Pb}^*/^{235}\text{U}$ | $\pm 2\sigma$<br>(abs) | $^{207}\text{Pb}^*/^{206}\text{Pb}^*$ | $\pm 2\sigma$<br>(abs) | corr.<br>coef. | $^{206}\text{Pb}^*/^{238}\text{U}$<br>age<br>(Ma) | $\pm 2\sigma$<br>(Ma) | $^{207}\text{Pb}^*/^{235}\text{U}$<br>age<br>(Ma) | $\pm 2\sigma$<br>(Ma) | $^{207}\text{Pb}^*/^{206}\text{Pb}^*$<br>age<br>(Ma) | $\pm 2\sigma$<br>(Ma) | Length<br>( $\mu\text{m}$ ) | Width<br>( $\mu\text{m}$ ) | Accept/<br>Reject |
|------------------------------------|------------------------|------------------------------------|------------------------|---------------------------------------|------------------------|----------------|---------------------------------------------------|-----------------------|---------------------------------------------------|-----------------------|------------------------------------------------------|-----------------------|-----------------------------|----------------------------|-------------------|
| 0.1123                             | 0.0035                 | 1.103                              | 0.041                  | 0.071                                 | 0.0024                 | 0.686          | 755                                               | 20                    | 686                                               | 20                    | 964                                                  | 69                    | 138                         | 50                         | a                 |
| 0.0273                             | 0.0021                 | 0.147                              | 0.041                  | 0.039                                 | 0.013                  | 0.737          | 140                                               | 36                    | 174                                               | 13                    |                                                      |                       | 95                          | 61                         | a                 |
| 0.1280                             | 0.0033                 | 1.229                              | 0.042                  | 0.0696                                | 0.0021                 | 0.718          | 814                                               | 19                    | 776                                               | 19                    | 917                                                  | 61                    | 107                         | 50                         | a                 |
| 0.1317                             | 0.0037                 | 1.302                              | 0.043                  | 0.0717                                | 0.0019                 | 0.778          | 847                                               | 19                    | 797                                               | 21                    | 977                                                  | 54                    | 117                         | 115                        | a                 |
| 0.1410                             | 0.0038                 | 1.276                              | 0.045                  | 0.0657                                | 0.0022                 | 0.743          | 835                                               | 20                    | 850                                               | 21                    | 796                                                  | 69                    | 135                         | 107                        | r                 |
| 0.1171                             | 0.0035                 | 0.988                              | 0.045                  | 0.0612                                | 0.0035                 | 0.485          | 698                                               | 23                    | 714                                               | 20                    | 646                                                  | 124                   | 149                         | 65                         | a                 |
| 0.1364                             | 0.0033                 | 1.417                              | 0.046                  | 0.0754                                | 0.0031                 | 0.529          | 896                                               | 20                    | 824                                               | 19                    | 1078                                                 | 82                    | 161                         | 60                         | a                 |
| 0.1397                             | 0.0038                 | 1.380                              | 0.047                  | 0.0716                                | 0.0020                 | 0.773          | 880                                               | 20                    | 843                                               | 21                    | 975                                                  | 56                    | 144                         | 87                         | a                 |
| 0.1387                             | 0.0037                 | 1.195                              | 0.047                  | 0.0625                                | 0.0028                 | 0.645          | 798                                               | 22                    | 838                                               | 21                    | 690                                                  | 96                    | 118                         | 63                         | a                 |
| 0.0446                             | 0.0044                 | 0.419                              | 0.048                  | 0.068                                 | 0.0057                 | 0.904          | 355                                               | 34                    | 282                                               | 27                    | 870                                                  | 175                   | 132                         | 41                         | a                 |
| 0.1461                             | 0.0041                 | 1.409                              | 0.048                  | 0.0699                                | 0.0020                 | 0.786          | 893                                               | 20                    | 879                                               | 23                    | 926                                                  | 59                    | 95                          | 56                         | a                 |
| 0.1375                             | 0.0041                 | 1.311                              | 0.048                  | 0.0692                                | 0.0022                 | 0.765          | 851                                               | 21                    | 831                                               | 23                    | 904                                                  | 66                    | 95                          | 92                         | a                 |
| 0.1457                             | 0.0041                 | 1.429                              | 0.050                  | 0.0711                                | 0.0019                 | 0.797          | 901                                               | 21                    | 877                                               | 23                    | 960                                                  | 56                    | 91                          | 48                         | a                 |
| 0.1462                             | 0.0040                 | 1.483                              | 0.051                  | 0.0736                                | 0.0022                 | 0.760          | 923                                               | 21                    | 880                                               | 23                    | 1030                                                 | 60                    | 105                         | 60                         | a                 |
| 0.1259                             | 0.0061                 | 1.060                              | 0.056                  | 0.0610                                | 0.0017                 | 0.883          | 734                                               | 27                    | 765                                               | 35                    | 641                                                  | 58                    | 95                          | 40                         | a                 |
| 0.0576                             | 0.0025                 | 0.281                              | 0.057                  | 0.035                                 | 0.010                  | 0.853          | 252                                               | 45                    | 361                                               | 15                    |                                                      |                       | 135                         | 61                         | r                 |
| 0.1497                             | 0.0042                 | 1.466                              | 0.058                  | 0.0710                                | 0.0023                 | 0.764          | 917                                               | 24                    | 899                                               | 24                    | 959                                                  | 66                    | 114                         | 55                         | a                 |
| 0.1074                             | 0.0041                 | 0.797                              | 0.059                  | 0.0538                                | 0.0052                 | 0.929          | 595                                               | 33                    | 657                                               | 24                    | 364                                                  | 217                   | 140                         | 51                         | a                 |
| 0.1567                             | 0.0049                 | 1.587                              | 0.062                  | 0.0735                                | 0.0024                 | 0.784          | 965                                               | 24                    | 938                                               | 27                    | 1027                                                 | 67                    | 144                         | 74                         | a                 |
| 0.1355                             | 0.0047                 | 1.359                              | 0.062                  | 0.0727                                | 0.0034                 | 0.666          | 871                                               | 27                    | 819                                               | 26                    | 1006                                                 | 95                    | 89                          | 66                         | a                 |
| 0.1439                             | 0.0049                 | 1.550                              | 0.064                  | 0.0781                                | 0.0026                 | 0.764          | 950                                               | 26                    | 866                                               | 28                    | 1150                                                 | 67                    | 90                          | 60                         | a                 |
| 0.0788                             | 0.0022                 | 0.528                              | 0.064                  | 0.0485                                | 0.0092                 | 0.885          | 430                                               | 43                    | 489                                               | 13                    | 126                                                  | 445                   | 96                          | 69                         | a                 |
| 0.1248                             | 0.0056                 | 1.353                              | 0.067                  | 0.079                                 | 0.0024                 | 0.818          | 869                                               | 29                    | 758                                               | 32                    | 1164                                                 | 60                    | 100                         | 92                         | a                 |
| 0.0486                             | 0.0040                 | 0.370                              | 0.068                  | 0.055                                 | 0.015                  | 0.821          | 320                                               | 50                    | 306                                               | 25                    | 422                                                  | 617                   | 140                         | 124                        | a                 |
| 0.2297                             | 0.0047                 | 2.064                              | 0.068                  | 0.0652                                | 0.0035                 | 0.655          | 1137                                              | 23                    | 1333                                              | 25                    | 780                                                  | 114                   | 136                         | 62                         | a                 |
| 0.1604                             | 0.0053                 | 1.788                              | 0.068                  | 0.0809                                | 0.0021                 | 0.827          | 1041                                              | 25                    | 959                                               | 29                    | 1218                                                 | 52                    | 142                         | 97                         | a                 |
| 0.1376                             | 0.0043                 | 1.194                              | 0.069                  | 0.0629                                | 0.0048                 | 0.944          | 798                                               | 32                    | 831                                               | 24                    | 705                                                  | 161                   | 148                         | 100                        | a                 |
| 0.0434                             | 0.0025                 | 0.035                              | 0.069                  | 0.006                                 | 0.016                  | 0.708          | 35                                                | 68                    | 274                                               | 15                    |                                                      |                       | 82                          | 54                         | r                 |
| 0.0911                             | 0.0070                 | 0.528                              | 0.070                  | 0.0420                                | 0.0071                 | 0.466          | 430                                               | 46                    | 562                                               | 42                    |                                                      |                       | 98                          | 49                         | a                 |
| 0.0616                             | 0.0028                 | 0.694                              | 0.071                  | 0.082                                 | 0.011                  | 0.874          | 535                                               | 42                    | 385                                               | 17                    | 1238                                                 | 269                   | 146                         | 61                         | r                 |
| 0.0652                             | 0.0020                 | 0.266                              | 0.073                  | 0.030                                 | 0.012                  | 0.862          | 240                                               | 58                    | 407                                               | 12                    |                                                      |                       | 93                          | 50                         | r                 |
| 0.0633                             | 0.0024                 | 0.315                              | 0.074                  | 0.036                                 | 0.013                  | 0.861          | 278                                               | 57                    | 396                                               | 14                    |                                                      |                       | 125                         | 81                         | a                 |
| 0.0271                             | 0.0015                 | 0.120                              | 0.074                  | 0.032                                 | 0.025                  | 0.723          | 115                                               | 67                    | 172                                               | 9                     |                                                      |                       | 70                          | 58                         | a                 |
| 0.1603                             | 0.0049                 | 1.809                              | 0.075                  | 0.0818                                | 0.0028                 | 0.754          | 1049                                              | 27                    | 959                                               | 27                    | 1242                                                 | 66                    | 75                          | 54                         | a                 |
| 0.1286                             | 0.0070                 | 1.347                              | 0.078                  | 0.076                                 | 0.0022                 | 0.868          | 866                                               | 34                    | 780                                               | 40                    | 1094                                                 | 57                    | 156                         | 91                         | a                 |
| 0.1596                             | 0.0057                 | 1.551                              | 0.079                  | 0.0705                                | 0.0025                 | 0.812          | 951                                               | 31                    | 954                                               | 32                    | 942                                                  | 74                    | 104                         | 85                         | a                 |
| 0.1166                             | 0.0046                 | 1.662                              | 0.079                  | 0.1034                                | 0.0037                 | 0.631          | 994                                               | 30                    | 711                                               | 26                    | 1686                                                 | 65                    | 88                          | 58                         | r                 |
| 0.1789                             | 0.0061                 | 1.855                              | 0.083                  | 0.0752                                | 0.0026                 | 0.818          | 1065                                              | 29                    | 1061                                              | 33                    | 1074                                                 | 70                    | 78                          | 41                         | a                 |
| 0.1470                             | 0.0077                 | 1.439                              | 0.083                  | 0.0710                                | 0.0022                 | 0.878          | 905                                               | 35                    | 884                                               | 43                    | 957                                                  | 64                    | 93                          | 42                         | a                 |
| 0.1679                             | 0.0055                 | 2.090                              | 0.084                  | 0.090                                 | 0.0026                 | 0.802          | 1145                                              | 28                    | 1001                                              | 30                    | 1431                                                 | 54                    | 181                         | 118                        | a                 |
| 0.1472                             | 0.0045                 | 1.624                              | 0.084                  | 0.080                                 | 0.0049                 | 0.953          | 979                                               | 33                    | 885                                               | 26                    | 1198                                                 | 120                   | 92                          | 55                         | a                 |
| 0.1642                             | 0.0064                 | 1.679                              | 0.086                  | 0.0742                                | 0.0024                 | 0.843          | 1001                                              | 32                    | 980                                               | 35                    | 1046                                                 | 64                    | 101                         | 53                         | a                 |
| 0.1288                             | 0.0060                 | 1.110                              | 0.089                  | 0.0625                                | 0.0067                 | 0.939          | 758                                               | 43                    | 781                                               | 35                    | 692                                                  | 228                   | 88                          | 59                         | a                 |
| 0.1364                             | 0.0048                 | 2.275                              | 0.092                  | 0.1210                                | 0.0035                 | 0.671          | 1205                                              | 29                    | 824                                               | 27                    | 1971                                                 | 52                    | 126                         | 88                         | r                 |
| 0.1658                             | 0.0063                 | 1.968                              | 0.096                  | 0.086                                 | 0.0028                 | 0.814          | 1105                                              | 33                    | 989                                               | 35                    | 1340                                                 | 62                    | 139                         | 88                         | a                 |
| 0.1711                             | 0.0061                 | 2.168                              | 0.096                  | 0.092                                 | 0.0026                 | 0.825          | 1171                                              | 31                    | 1018                                              | 34                    | 1466                                                 | 53                    | 116                         | 80                         | a                 |
| 0.0988                             | 0.0049                 | 1.131                              | 0.098                  | 0.083                                 | 0.0093                 | 0.924          | 768                                               | 47                    | 607                                               | 28                    | 1270                                                 | 219                   | 77                          | 64                         | a                 |
| 0.1734                             | 0.0069                 | 2.068                              | 0.099                  | 0.086                                 | 0.0028                 | 0.829          | 1138                                              | 33                    | 1031                                              | 38                    | 1349                                                 | 63                    | 125                         | 60                         | a                 |
| 0.1751                             | 0.0063                 | 2.223                              | 0.099                  | 0.092                                 | 0.0025                 | 0.832          | 1188                                              | 31                    | 1040                                              | 35                    | 1469                                                 | 52                    | 107                         | 79                         | a                 |
| 0.1660                             | 0.0070                 | 1.99                               | 0.10                   | 0.087                                 | 0.0025                 | 0.852          | 1110                                              | 35                    | 990                                               | 39                    | 1355                                                 | 55                    | 90                          | 55                         | a                 |
| 0.1499                             | 0.0041                 | 1.75                               | 0.11                   | 0.085                                 | 0.0085                 | 0.935          | 1027                                              | 39                    | 900                                               | 23                    | 1308                                                 | 194                   | 141                         | 80                         | a                 |

| $^{206}\text{Pb}^*/^{238}\text{U}$ | $\pm 2\sigma$<br>(abs) | $^{207}\text{Pb}^*/^{235}\text{U}$ | $\pm 2\sigma$<br>(abs) | $^{207}\text{Pb}^*/^{206}\text{Pb}^*$ | $\pm 2\sigma$<br>(abs) | corr.<br>coef. | $^{206}\text{Pb}^*/^{238}\text{U}$<br>age<br>(Ma) | $\pm 2\sigma$<br>(Ma) | $^{207}\text{Pb}^*/^{235}\text{U}$<br>age<br>(Ma) | $\pm 2\sigma$<br>(Ma) | $^{207}\text{Pb}^*/^{206}\text{Pb}^*$<br>age<br>(Ma) | $\pm 2\sigma$<br>(Ma) | Length<br>( $\mu\text{m}$ ) | Width<br>( $\mu\text{m}$ ) | Accept/<br>Reject |
|------------------------------------|------------------------|------------------------------------|------------------------|---------------------------------------|------------------------|----------------|---------------------------------------------------|-----------------------|---------------------------------------------------|-----------------------|------------------------------------------------------|-----------------------|-----------------------------|----------------------------|-------------------|
| 0.1476                             | 0.0063                 | 1.70                               | 0.11                   | 0.084                                 | 0.0054                 | 0.591          | 1008                                              | 40                    | 888                                               | 35                    | 1281                                                 | 126                   | 156                         | 75                         | a                 |
| 0.1863                             | 0.0064                 | 2.68                               | 0.11                   | 0.10                                  | 0.0028                 | 0.819          | 1322                                              | 31                    | 1101                                              | 35                    | 1701                                                 | 49                    | 153                         | 60                         | a                 |
| 0.1472                             | 0.0047                 | 1.07                               | 0.11                   | 0.0525                                | 0.0079                 | 0.944          | 737                                               | 56                    | 885                                               | 27                    | 309                                                  | 341                   | 113                         | 54                         | a                 |
| 0.1592                             | 0.0081                 | 2.02                               | 0.12                   | 0.092                                 | 0.0025                 | 0.873          | 1124                                              | 39                    | 952                                               | 45                    | 1472                                                 | 51                    | 100                         | 71                         | a                 |
| 0.1625                             | 0.0082                 | 2.07                               | 0.12                   | 0.092                                 | 0.0024                 | 0.877          | 1138                                              | 38                    | 970                                               | 45                    | 1472                                                 | 50                    | 122                         | 62                         | a                 |
| 0.1641                             | 0.0070                 | 1.70                               | 0.12                   | 0.0749                                | 0.0035                 | 0.786          | 1007                                              | 44                    | 980                                               | 39                    | 1066                                                 | 94                    | 115                         | 90                         | a                 |
| 0.1758                             | 0.0072                 | 1.47                               | 0.12                   | 0.0606                                | 0.0035                 | 0.791          | 918                                               | 49                    | 1044                                              | 39                    | 625                                                  | 126                   | 94                          | 66                         | a                 |
| 0.0897                             | 0.0056                 | 1.13                               | 0.12                   | 0.091                                 | 0.013                  | 0.914          | 768                                               | 57                    | 554                                               | 33                    | 1454                                                 | 269                   | 73                          | 60                         | r                 |
| 0.3032                             | 0.0059                 | 4.60                               | 0.12                   | 0.1101                                | 0.0044                 | 0.664          | 1750                                              | 22                    | 1707                                              | 29                    | 1801                                                 | 73                    | 158                         | 60                         | a                 |
| 0.2053                             | 0.0071                 | 3.01                               | 0.12                   | 0.11                                  | 0.0027                 | 0.839          | 1410                                              | 31                    | 1204                                              | 38                    | 1737                                                 | 47                    | 97                          | 84                         | a                 |
| 0.1251                             | 0.0060                 | 1.15                               | 0.13                   | 0.0664                                | 0.0091                 | 0.941          | 775                                               | 59                    | 760                                               | 34                    | 820                                                  | 288                   | 109                         | 97                         | a                 |
| 0.1623                             | 0.0066                 | 2.69                               | 0.13                   | 0.12                                  | 0.0032                 | 0.798          | 1326                                              | 35                    | 970                                               | 36                    | 1960                                                 | 47                    | 94                          | 73                         | r                 |
| 0.1698                             | 0.0059                 | 2.05                               | 0.13                   | 0.087                                 | 0.0050                 | 0.602          | 1132                                              | 43                    | 1011                                              | 32                    | 1371                                                 | 110                   |                             |                            | a                 |
| 0.2009                             | 0.0072                 | 2.85                               | 0.13                   | 0.10                                  | 0.0029                 | 0.832          | 1370                                              | 34                    | 1180                                              | 39                    | 1680                                                 | 52                    | 120                         | 60                         | a                 |
| 0.1548                             | 0.0049                 | 3.28                               | 0.13                   | 0.1538                                | 0.0042                 | 0.600          | 1477                                              | 31                    | 928                                               | 27                    | 2389                                                 | 47                    | 118                         | 78                         | r                 |
| 0.1903                             | 0.0068                 | 2.01                               | 0.13                   | 0.0764                                | 0.0086                 | 0.948          | 1118                                              | 45                    | 1123                                              | 37                    | 1107                                                 | 224                   | 85                          | 59                         | a                 |
| 0.3104                             | 0.0068                 | 4.94                               | 0.14                   | 0.1154                                | 0.0045                 | 0.711          | 1809                                              | 23                    | 1743                                              | 33                    | 1886                                                 | 70                    | 95                          | 62                         | a                 |
| 0.2482                             | 0.0054                 | 2.51                               | 0.14                   | 0.0735                                | 0.0079                 | 0.954          | 1276                                              | 40                    | 1429                                              | 28                    | 1027                                                 | 217                   | 146                         | 84                         | a                 |
| 0.2104                             | 0.0075                 | 3.39                               | 0.14                   | 0.12                                  | 0.0029                 | 0.837          | 1503                                              | 32                    | 1231                                              | 40                    | 1910                                                 | 45                    | 126                         | 99                         | a                 |
| 0.1621                             | 0.0080                 | 2.02                               | 0.14                   | 0.090                                 | 0.0054                 | 0.698          | 1122                                              | 47                    | 968                                               | 44                    | 1432                                                 | 115                   | 160                         | 125                        | a                 |
| 0.1892                             | 0.0090                 | 2.69                               | 0.14                   | 0.10                                  | 0.0026                 | 0.880          | 1326                                              | 39                    | 1117                                              | 49                    | 1683                                                 | 47                    | 70                          | 60                         | a                 |
| 0.1636                             | 0.0053                 | 2.20                               | 0.14                   | 0.097                                 | 0.0069                 | 0.961          | 1180                                              | 45                    | 977                                               | 29                    | 1574                                                 | 132                   | 123                         | 75                         | a                 |
| 0.1899                             | 0.0090                 | 2.68                               | 0.14                   | 0.10                                  | 0.0049                 | 0.766          | 1323                                              | 39                    | 1121                                              | 49                    | 1668                                                 | 89                    | 146                         | 64                         | a                 |
| 0.112                              | 0.010                  | 1.47                               | 0.14                   | 0.095                                 | 0.0055                 | 0.770          | 917                                               | 59                    | 685                                               | 60                    | 1526                                                 | 109                   | 136                         | 35                         | r                 |
| 0.2896                             | 0.0064                 | 2.98                               | 0.15                   | 0.0747                                | 0.0073                 | 0.960          | 1403                                              | 38                    | 1639                                              | 32                    | 1061                                                 | 197                   | 164                         | 63                         | a                 |
| 0.2038                             | 0.0075                 | 3.24                               | 0.15                   | 0.12                                  | 0.0032                 | 0.825          | 1467                                              | 35                    | 1196                                              | 40                    | 1886                                                 | 50                    | 78                          | 61                         | a                 |
| 0.2185                             | 0.0075                 | 3.88                               | 0.16                   | 0.13                                  | 0.0032                 | 0.820          | 1609                                              | 33                    | 1274                                              | 40                    | 2080                                                 | 44                    | 129                         | 77                         | a                 |
| 0.313                              | 0.010                  | 3.92                               | 0.16                   | 0.0908                                | 0.0047                 | 0.811          | 1618                                              | 33                    | 1756                                              | 52                    | 1442                                                 | 98                    | 127                         | 90                         | a                 |
| 0.2719                             | 0.0058                 | 4.25                               | 0.16                   | 0.1134                                | 0.0080                 | 0.961          | 1684                                              | 32                    | 1551                                              | 29                    | 1855                                                 | 127                   | 125                         | 40                         | a                 |
| 0.1897                             | 0.0067                 | 2.89                               | 0.16                   | 0.11                                  | 0.0059                 | 0.584          | 1380                                              | 43                    | 1120                                              | 36                    | 1810                                                 | 98                    | 118                         | 79                         | a                 |
| 0.2349                             | 0.0085                 | 3.99                               | 0.17                   | 0.12                                  | 0.0053                 | 0.730          | 1632                                              | 34                    | 1360                                              | 45                    | 2002                                                 | 77                    | 84                          | 62                         | a                 |
| 0.0265                             | 0.0052                 | 0.33                               | 0.17                   | 0.090                                 | 0.014                  | 0.935          | 289                                               | 128                   | 169                                               | 33                    | 1427                                                 | 288                   | 124                         | 85                         | a                 |
| 0.0919                             | 0.0042                 | 0.33                               | 0.17                   | 0.026                                 | 0.022                  | 0.892          | 292                                               | 131                   | 567                                               | 25                    |                                                      |                       | 125                         | 89                         | r                 |
| 0.193                              | 0.011                  | 2.77                               | 0.17                   | 0.10                                  | 0.0028                 | 0.893          | 1348                                              | 47                    | 1135                                              | 59                    | 1704                                                 | 50                    | 197                         | 136                        | a                 |
| 0.2324                             | 0.0098                 | 3.52                               | 0.18                   | 0.11                                  | 0.0033                 | 0.860          | 1531                                              | 40                    | 1347                                              | 51                    | 1795                                                 | 55                    |                             |                            | a                 |
| 0.210                              | 0.010                  | 2.85                               | 0.18                   | 0.098                                 | 0.0041                 | 0.834          | 1370                                              | 46                    | 1231                                              | 54                    | 1594                                                 | 77                    | 121                         | 60                         | a                 |
| 0.1856                             | 0.0066                 | 2.45                               | 0.18                   | 0.096                                 | 0.012                  | 0.945          | 1258                                              | 53                    | 1098                                              | 36                    | 1544                                                 | 238                   | 130                         | 60                         | a                 |
| 0.3251                             | 0.0080                 | 5.71                               | 0.18                   | 0.1273                                | 0.0058                 | 0.681          | 1933                                              | 28                    | 1815                                              | 39                    | 2061                                                 | 80                    | 196                         | 78                         | a                 |
| 0.2267                             | 0.0075                 | 2.61                               | 0.19                   | 0.083                                 | 0.011                  | 0.952          | 1303                                              | 52                    | 1317                                              | 39                    | 1280                                                 | 256                   | 122                         | 51                         | a                 |
| 0.242                              | 0.011                  | 2.99                               | 0.19                   | 0.0898                                | 0.0030                 | 0.892          | 1405                                              | 47                    | 1395                                              | 59                    | 1420                                                 | 63                    | 80                          | 58                         | a                 |
| 0.2084                             | 0.0100                 | 3.21                               | 0.19                   | 0.11                                  | 0.0034                 | 0.861          | 1460                                              | 45                    | 1220                                              | 53                    | 1828                                                 | 55                    | 170                         | 100                        | a                 |
| 0.1564                             | 0.0097                 | 1.79                               | 0.19                   | 0.083                                 | 0.0100                 | 0.481          | 1040                                              | 70                    | 937                                               | 54                    | 1264                                                 | 235                   | 78                          | 65                         | a                 |
| 0.258                              | 0.010                  | 4.39                               | 0.20                   | 0.12                                  | 0.0031                 | 0.877          | 1710                                              | 37                    | 1479                                              | 52                    | 2005                                                 | 44                    | 105                         | 54                         | a                 |
| 0.0810                             | 0.0066                 | 0.46                               | 0.20                   | 0.041                                 | 0.024                  | 0.901          | 382                                               | 138                   | 502                                               | 39                    |                                                      |                       | 95                          | 57                         | a                 |
| 0.2718                             | 0.0058                 | 4.39                               | 0.20                   | 0.12                                  | 0.010                  | 0.958          | 1710                                              | 38                    | 1550                                              | 29                    | 1913                                                 | 158                   | 163                         | 64                         | a                 |
| 0.2402                             | 0.0085                 | 3.44                               | 0.20                   | 0.1039                                | 0.0053                 | 0.733          | 1514                                              | 47                    | 1388                                              | 44                    | 1696                                                 | 94                    | 240                         | 57                         | a                 |
| 0.0190                             | 0.0027                 | 0.24                               | 0.20                   | 0.092                                 | 0.093                  | 0.635          | 220                                               | 167                   | 121                                               | 17                    | 1475                                                 | 1919                  | 130                         | 90                         | a                 |
| 0.234                              | 0.011                  | 4.30                               | 0.21                   | 0.13                                  | 0.0043                 | 0.839          | 1693                                              | 40                    | 1355                                              | 57                    | 2142                                                 | 56                    | 75                          | 45                         | a                 |
| 0.359                              | 0.011                  | 5.83                               | 0.21                   | 0.1177                                | 0.0046                 | 0.832          | 1951                                              | 31                    | 1980                                              | 54                    | 1921                                                 | 70                    | 69                          | 54                         | a                 |
| 0.218                              | 0.011                  | 3.58                               | 0.22                   | 0.12                                  | 0.0042                 | 0.844          | 1544                                              | 48                    | 1269                                              | 59                    | 1944                                                 | 64                    |                             |                            | a                 |
| 0.414                              | 0.012                  | 6.24                               | 0.22                   | 0.1092                                | 0.0047                 | 0.834          | 2010                                              | 30                    | 2235                                              | 54                    | 1786                                                 | 78                    | 75                          | 65                         | a                 |

| $^{206}\text{Pb}^*/^{238}\text{U}$                   | $\pm 2\sigma$<br>(abs) | $^{207}\text{Pb}^*/^{235}\text{U}$ | $\pm 2\sigma$<br>(abs) | $^{207}\text{Pb}^*/^{206}\text{Pb}^*$ | $\pm 2\sigma$<br>(abs) | corr.<br>coef. | $^{206}\text{Pb}^*/^{238}\text{U}$<br>age<br>(Ma) | $\pm 2\sigma$<br>(Ma) | $^{207}\text{Pb}^*/^{235}\text{U}$<br>age<br>(Ma) | $\pm 2\sigma$<br>(Ma) | $^{207}\text{Pb}^*/^{206}\text{Pb}^*$<br>age<br>(Ma) | $\pm 2\sigma$<br>(Ma) | Length<br>( $\mu\text{m}$ ) | Width<br>( $\mu\text{m}$ ) | Accept/<br>Reject |
|------------------------------------------------------|------------------------|------------------------------------|------------------------|---------------------------------------|------------------------|----------------|---------------------------------------------------|-----------------------|---------------------------------------------------|-----------------------|------------------------------------------------------|-----------------------|-----------------------------|----------------------------|-------------------|
| 0.0283                                               | 0.0029                 | 0.37                               | 0.22                   | 0.094                                 | 0.072                  | 0.742          | 317                                               | 164                   | 180                                               | 18                    | 1509                                                 | 1444                  | 127                         | 75                         | a                 |
| 0.1717                                               | 0.0073                 | 2.33                               | 0.22                   | 0.098                                 | 0.0093                 | 0.966          | 1221                                              | 68                    | 1021                                              | 40                    | 1593                                                 | 177                   | 196                         | 50                         | a                 |
| 0.159                                                | 0.016                  | 2.28                               | 0.24                   | 0.10                                  | 0.0034                 | 0.910          | 1208                                              | 73                    | 950                                               | 88                    | 1703                                                 | 61                    | 112                         | 70                         | a                 |
| 0.349                                                | 0.010                  | 7.37                               | 0.24                   | 0.15                                  | 0.0053                 | 0.776          | 2157                                              | 29                    | 1929                                              | 48                    | 2382                                                 | 59                    | 106                         | 48                         | a                 |
| 0.088                                                | 0.011                  | 1.24                               | 0.24                   | 0.1025                                | 0.0081                 | 0.680          | 819                                               | 110                   | 542                                               | 67                    | 1669                                                 | 146                   | 95                          | 72                         | r                 |
| 0.301                                                | 0.012                  | 3.50                               | 0.25                   | 0.084                                 | 0.011                  | 0.589          | 1527                                              | 56                    | 1697                                              | 62                    | 1299                                                 | 251                   | 122                         | 103                        | a                 |
| 0.1054                                               | 0.0047                 | 2.47                               | 0.25                   | 0.170                                 | 0.027                  | 0.915          | 1262                                              | 75                    | 646                                               | 27                    | 2555                                                 | 268                   | 72                          | 66                         | r                 |
| 0.146                                                | 0.011                  | 2.44                               | 0.26                   | 0.1213                                | 0.0090                 | 0.616          | 1254                                              | 76                    | 878                                               | 61                    | 1975                                                 | 133                   | 99                          | 97                         | r                 |
| 0.216                                                | 0.014                  | 3.62                               | 0.26                   | 0.12                                  | 0.0035                 | 0.897          | 1555                                              | 58                    | 1261                                              | 74                    | 1981                                                 | 51                    | 81                          | 75                         | a                 |
| 0.3585                                               | 0.0079                 | 3.92                               | 0.27                   | 0.079                                 | 0.012                  | 0.966          | 1618                                              | 56                    | 1975                                              | 37                    | 1179                                                 | 288                   | 70                          | 62                         | a                 |
| 0.0280                                               | 0.0069                 | 0.34                               | 0.28                   | 0.088                                 | 0.032                  | 0.908          | 298                                               | 212                   | 178                                               | 43                    | 1385                                                 | 698                   | 132                         | 121                        | a                 |
| 0.2767                                               | 0.0074                 | 2.28                               | 0.30                   | 0.060                                 | 0.017                  | 0.954          | 1205                                              | 92                    | 1575                                              | 38                    | 591                                                  | 606                   | 98                          | 60                         | a                 |
| 0.1486                                               | 0.0061                 | 2.05                               | 0.32                   | 0.10                                  | 0.021                  | 0.946          | 1132                                              | 106                   | 893                                               | 34                    | 1624                                                 | 392                   | 110                         | 74                         | a                 |
| 0.201                                                | 0.020                  | 3.02                               | 0.33                   | 0.11                                  | 0.0041                 | 0.916          | 1411                                              | 83                    | 1180                                              | 107                   | 1780                                                 | 68                    | 126                         | 75                         | a                 |
| 0.314                                                | 0.017                  | 5.76                               | 0.34                   | 0.13                                  | 0.0034                 | 0.916          | 1941                                              | 51                    | 1762                                              | 81                    | 2137                                                 | 45                    | 125                         | 92                         | a                 |
| 0.0728                                               | 0.0092                 | 1.16                               | 0.35                   | 0.116                                 | 0.059                  | 0.864          | 783                                               | 162                   | 453                                               | 55                    | 1891                                                 | 918                   | 86                          | 53                         | r                 |
| 0.223                                                | 0.023                  | 3.40                               | 0.39                   | 0.11                                  | 0.012                  | 0.785          | 1504                                              | 91                    | 1300                                              | 123                   | 1804                                                 | 195                   | 100                         | 30                         | a                 |
| 0.1118                                               | 0.0081                 | 1.51                               | 0.41                   | 0.098                                 | 0.041                  | 0.920          | 936                                               | 167                   | 683                                               | 47                    | 1591                                                 | 781                   | 97                          | 76                         | r                 |
| 0.2303                                               | 0.0093                 | 3.70                               | 0.50                   | 0.12                                  | 0.031                  | 0.949          | 1571                                              | 107                   | 1336                                              | 49                    | 1903                                                 | 482                   | 104                         | 65                         | a                 |
| 0.2231                                               | 0.0098                 | 2.36                               | 0.55                   | 0.077                                 | 0.036                  | 0.946          | 1230                                              | 166                   | 1298                                              | 52                    | 1113                                                 | 948                   | 107                         | 77                         | a                 |
| 0.1001                                               | 0.0094                 | 3.61                               | 0.62                   | 0.261                                 | 0.041                  | 0.947          | 1551                                              | 136                   | 615                                               | 55                    | 3254                                                 | 246                   | 83                          | 77                         | r                 |
| 0.168                                                | 0.019                  | 3.18                               | 0.67                   | 0.137                                 | 0.025                  | 0.970          | 1453                                              | 162                   | 1002                                              | 106                   | 2192                                                 | 311                   | 183                         | 60                         | r                 |
| 0.138                                                | 0.022                  | 2.77                               | 0.73                   | 0.145                                 | 0.017                  | 0.643          | 1348                                              | 196                   | 836                                               | 124                   | 2290                                                 | 206                   | 82                          | 63                         | r                 |
| 0.183                                                | 0.020                  | 4.11                               | 0.76                   | 0.163                                 | 0.027                  | 0.971          | 1657                                              | 151                   | 1083                                              | 107                   | 2488                                                 | 281                   | 89                          | 64                         | r                 |
| 0.081                                                | 0.017                  | 2.51                               | 0.88                   | 0.224                                 | 0.087                  | 0.921          | 1274                                              | 256                   | 502                                               | 100                   | 3012                                                 | 622                   | 80                          | 44                         | r                 |
| 0.130                                                | 0.020                  | 3.721                              | 1.024                  | 0.207                                 | 0.047                  | 0.963          | 1576                                              | 220                   | 790                                               | 114                   | 2882                                                 | 365                   | 173                         | 71                         | r                 |
| 0.083                                                | 0.021                  | 3.235                              | 1.039                  | 0.284                                 | 0.086                  | 0.933          | 1466                                              | 249                   | 511                                               | 126                   | 3387                                                 | 472                   | 69                          | 54                         | r                 |
| 0.067                                                | 0.026                  | 1.57                               | 1.60                   | 0.17                                  | 0.25                   | 0.877          | 959                                               | 633                   | 418                                               | 154                   | 2557                                                 | 2435                  | 75                          | 65                         | a                 |
| 0.115                                                | 0.033                  | 2.66                               | 2.20                   | 0.168                                 | 0.027                  | 0.634          | 1319                                              | 609                   | 704                                               | 191                   | 2533                                                 | 272                   | 109                         | 55                         | a                 |
| 0.138                                                | 0.025                  | 7.54                               | 2.34                   | 0.397                                 | 0.067                  | 0.977          | 2178                                              | 279                   | 832                                               | 143                   | 3899                                                 | 256                   | 78                          | 70                         | r                 |
| 0.325                                                | 0.021                  | 0.5                                | 2.8                    | 0.01                                  | 0.14                   | 0.952          | 420                                               | 1879                  | 1816                                              | 104                   |                                                      |                       | 102                         | 50                         | r                 |
| 0.172                                                | 0.050                  | 7.61                               | 3.36                   | 0.321                                 | 0.070                  | 0.983          | 2186                                              | 397                   | 1022                                              | 276                   | 3575                                                 | 333                   | 103                         | 86                         | r                 |
| 0.168                                                | 0.058                  | 3.63                               | 3.56                   | 0.16                                  | 0.28                   | 0.937          | 1557                                              | 781                   | 1002                                              | 322                   | 2419                                                 | 3014                  | 115                         | 64                         | a                 |
| 0.439                                                | 0.097                  | 16.31                              | 4.68                   | 0.27                                  | 0.10                   | 0.982          | 2895                                              | 275                   | 2347                                              | 437                   | 3302                                                 | 601                   | 143                         | 104                        | r                 |
| 0.101                                                | 0.071                  | 5.20                               | 5.17                   | 0.372                                 | 0.073                  | 0.989          | 1853                                              | 846                   | 623                                               | 413                   | 3799                                                 | 297                   | 77                          | 42                         | r                 |
| 0.11                                                 | 0.14                   | 3.28                               | 9.43                   | 0.216                                 | 0.039                  | 0.892          | 1475                                              | 2240                  | 672                                               | 818                   | 2953                                                 | 288                   | 77                          | 65                         | r                 |
| 0.13                                                 | 0.14                   | 6.87                               | 11.52                  | 0.388                                 | 0.045                  | 0.875          | 2094                                              | 1487                  | 779                                               | 804                   | 3862                                                 | 174                   | 146                         | 90                         | r                 |
| 0.12                                                 | 0.23                   | 6.26                               | 16.36                  | 0.388                                 | 0.039                  | 0.932          | 2012                                              | 2288                  | 714                                               | 1304                  | 3862                                                 | 153                   | 61                          | 56                         | r                 |
| 0.29                                                 | 0.25                   | 16.72                              | 20.74                  | 0.414                                 | 0.034                  | 0.946          | 2919                                              | 1188                  | 1656                                              | 1237                  | 3961                                                 | 124                   | 151                         | 55                         | r                 |
| 0.38                                                 | 0.19                   | 17.94                              | 23.78                  | 0.34                                  | 0.91                   | 0.969          | 2987                                              | 1275                  | 2084                                              | 895                   | 3668                                                 | 4080                  | 192                         | 140                        | r                 |
| <b>17. Purus River, Brazil (4.0261°S, 61.5141°W)</b> |                        |                                    |                        |                                       |                        |                |                                                   |                       |                                                   |                       |                                                      |                       |                             |                            |                   |
| 0.243                                                | 0.012                  | 2.46                               | 0.18                   | 0.0735                                | 0.0019                 |                | 1261                                              | 53                    | 1403                                              | 63                    | 1028                                                 | 54                    | 158                         | 54                         | a                 |
| 0.236                                                | 0.012                  | 2.36                               | 0.17                   | 0.0726                                | 0.0019                 |                | 1231                                              | 51                    | 1366                                              | 62                    | 1003                                                 | 53                    | 98                          | 95                         | a                 |
| 0.362                                                | 0.018                  | 4.90                               | 0.62                   | 0.0983                                | 0.0040                 |                | 1803                                              | 107                   | 1991                                              | 86                    | 1592                                                 | 76                    | 126                         | 60                         | a                 |
| 0.265                                                | 0.013                  | 2.91                               | 0.25                   | 0.0797                                | 0.0026                 |                | 1383                                              | 65                    | 1513                                              | 68                    | 1188                                                 | 65                    | 121                         | 58                         | a                 |
| 0.0972                                               | 0.0049                 | 0.726                              | 0.045                  | 0.0542                                | 0.0016                 |                | 554                                               | 27                    | 598                                               | 29                    | 379                                                  | 67                    | 66                          | 58                         | a                 |
| 0.365                                                | 0.018                  | 5.57                               | 0.55                   | 0.1106                                | 0.0031                 |                | 1912                                              | 85                    | 2008                                              | 87                    | 1809                                                 | 50                    | 186                         | 83                         | a                 |
| 0.351                                                | 0.018                  | 5.25                               | 0.48                   | 0.1083                                | 0.0029                 |                | 1860                                              | 78                    | 1941                                              | 84                    | 1771                                                 | 49                    | 166                         | 62                         | a                 |
| 0.276                                                | 0.014                  | 3.43                               | 0.26                   | 0.0901                                | 0.0024                 |                | 1511                                              | 60                    | 1571                                              | 70                    | 1427                                                 | 50                    | 105                         | 78                         | a                 |
| 0.220                                                | 0.011                  | 2.38                               | 0.23                   | 0.0784                                | 0.0037                 |                | 1237                                              | 69                    | 1284                                              | 58                    | 1157                                                 | 94                    | 95                          | 72                         | a                 |
| 0.0581                                               | 0.0029                 | 0.41                               | 0.00                   | 0.05                                  | 0.00                   |                | 352                                               | 0                     | 364                                               | 18                    | 277                                                  | 0                     | 117                         | 88                         | a                 |

| $^{206}\text{Pb}^*/^{238}\text{U}$ | $\pm 2\sigma$<br>(abs) | $^{207}\text{Pb}^*/^{235}\text{U}$ | $\pm 2\sigma$<br>(abs) | $^{207}\text{Pb}^*/^{206}\text{Pb}^*$ | $\pm 2\sigma$<br>(abs) | corr.<br>coef. | $^{206}\text{Pb}^*/^{238}\text{U}$<br>age<br>(Ma) | $\pm 2\sigma$<br>(Ma) | $^{207}\text{Pb}^*/^{235}\text{U}$<br>age<br>(Ma) | $\pm 2\sigma$<br>(Ma) | $^{207}\text{Pb}^*/^{206}\text{Pb}^*$<br>age<br>(Ma) | $\pm 2\sigma$<br>(Ma) | Length<br>( $\mu\text{m}$ ) | Width<br>( $\mu\text{m}$ ) | Accept/<br>Reject |
|------------------------------------|------------------------|------------------------------------|------------------------|---------------------------------------|------------------------|----------------|---------------------------------------------------|-----------------------|---------------------------------------------------|-----------------------|------------------------------------------------------|-----------------------|-----------------------------|----------------------------|-------------------|
| 0.1490                             | 0.0074                 | 1.353                              | 0.089                  | 0.0659                                | 0.0019                 |                | 869                                               | 38                    | 895                                               | 42                    | 803                                                  | 60                    | 198                         | 64                         | a                 |
| 0.212                              | 0.011                  | 2.28                               | 0.16                   | 0.0780                                | 0.0021                 |                | 1205                                              | 51                    | 1239                                              | 57                    | 1146                                                 | 54                    | 99                          | 73                         | a                 |
| 0.252                              | 0.013                  | 3.02                               | 0.28                   | 0.0868                                | 0.0037                 |                | 1411                                              | 72                    | 1448                                              | 65                    | 1357                                                 | 81                    | 263                         | 85                         | a                 |
| 0.284                              | 0.014                  | 3.74                               | 0.30                   | 0.0955                                | 0.0026                 |                | 1580                                              | 65                    | 1612                                              | 72                    | 1538                                                 | 52                    | 173                         | 67                         | a                 |
| 0.1125                             | 0.0056                 | 0.948                              | 0.063                  | 0.0612                                | 0.0018                 |                | 677                                               | 33                    | 687                                               | 33                    | 645                                                  | 64                    | 114                         | 70                         | a                 |
| 0.219                              | 0.011                  | 2.45                               | 0.17                   | 0.0814                                | 0.0022                 |                | 1259                                              | 51                    | 1274                                              | 58                    | 1232                                                 | 52                    | 129                         | 70                         | a                 |
| 0.220                              | 0.011                  | 2.50                               | 0.18                   | 0.0822                                | 0.0022                 |                | 1271                                              | 51                    | 1283                                              | 58                    | 1251                                                 | 53                    | 133                         | 101                        | a                 |
| 0.0538                             | 0.0027                 | 0.393                              | 0.022                  | 0.0530                                | 0.0015                 |                | 336                                               | 16                    | 338                                               | 16                    | 327                                                  | 66                    | 161                         | 102                        | a                 |
| 0.0790                             | 0.0039                 | 0.620                              | 0.036                  | 0.0569                                | 0.0015                 |                | 490                                               | 23                    | 490                                               | 24                    | 488                                                  | 59                    | 195                         | 107                        | a                 |
| 0.1415                             | 0.0071                 | 1.32                               | 0.12                   | 0.0675                                | 0.0032                 |                | 853                                               | 51                    | 853                                               | 40                    | 853                                                  | 100                   | 87                          | 72                         | a                 |
| 0.1430                             | 0.0071                 | 1.37                               | 0.14                   | 0.0697                                | 0.0038                 |                | 878                                               | 59                    | 861                                               | 40                    | 920                                                  | 111                   | 128                         | 92                         | a                 |
| 0.1894                             | 0.0095                 | 2.10                               | 0.15                   | 0.0804                                | 0.0022                 |                | 1149                                              | 48                    | 1118                                              | 52                    | 1207                                                 | 55                    | 118                         | 70                         | a                 |
| 0.1163                             | 0.0058                 | 1.053                              | 0.064                  | 0.0657                                | 0.0018                 |                | 730                                               | 31                    | 709                                               | 34                    | 797                                                  | 57                    | 112                         | 66                         | a                 |
| 0.0411                             | 0.0021                 | 0.302                              | 0.020                  | 0.0532                                | 0.0020                 |                | 268                                               | 15                    | 260                                               | 13                    | 339                                                  | 86                    | 94                          | 61                         | a                 |
| 0.1900                             | 0.0095                 | 2.12                               | 0.14                   | 0.0811                                | 0.0022                 |                | 1157                                              | 47                    | 1121                                              | 52                    | 1224                                                 | 53                    | 122                         | 74                         | a                 |
| 0.0620                             | 0.0031                 | 0.483                              | 0.033                  | 0.0565                                | 0.0020                 |                | 400                                               | 23                    | 388                                               | 19                    | 474                                                  | 76                    | 97                          | 68                         | a                 |
| 0.1298                             | 0.0065                 | 1.234                              | 0.090                  | 0.0689                                | 0.0024                 |                | 816                                               | 41                    | 787                                               | 37                    | 897                                                  | 72                    | 153                         | 64                         | a                 |
| 0.0280                             | 0.0014                 | 0.200                              | 0.035                  | 0.0519                                | 0.0067                 |                | 185                                               | 30                    | 178                                               | 9                     | 281                                                  | 296                   | 114                         | 78                         | a                 |
| 0.1523                             | 0.0076                 | 1.56                               | 0.10                   | 0.0743                                | 0.0020                 |                | 955                                               | 41                    | 914                                               | 43                    | 1050                                                 | 55                    | 129                         | 74                         | a                 |
| 0.0400                             | 0.0020                 | 0.298                              | 0.018                  | 0.0540                                | 0.0017                 |                | 265                                               | 14                    | 253                                               | 12                    | 372                                                  | 70                    | 141                         | 100                        | a                 |
| 0.1905                             | 0.0095                 | 2.21                               | 0.21                   | 0.0841                                | 0.0041                 |                | 1184                                              | 68                    | 1124                                              | 52                    | 1295                                                 | 94                    | 119                         | 102                        | a                 |
| 0.236                              | 0.012                  | 3.14                               | 0.23                   | 0.0967                                | 0.0028                 |                | 1443                                              | 57                    | 1364                                              | 62                    | 1562                                                 | 53                    | 123                         | 85                         | a                 |
| 0.1542                             | 0.0077                 | 1.64                               | 0.19                   | 0.0770                                | 0.0053                 |                | 984                                               | 75                    | 924                                               | 43                    | 1120                                                 | 137                   | 147                         | 70                         | a                 |
| 0.0549                             | 0.0027                 | 0.436                              | 0.028                  | 0.0576                                | 0.0021                 |                | 368                                               | 20                    | 345                                               | 17                    | 516                                                  | 81                    | 75                          | 62                         | a                 |
| 0.0525                             | 0.0026                 | 0.415                              | 0.028                  | 0.0573                                | 0.0021                 |                | 352                                               | 20                    | 330                                               | 16                    | 502                                                  | 80                    | 78                          | 66                         | a                 |
| 0.266                              | 0.013                  | 3.95                               | 0.30                   | 0.1077                                | 0.0028                 |                | 1624                                              | 61                    | 1520                                              | 68                    | 1761                                                 | 48                    | 97                          | 62                         | a                 |
| 0.279                              | 0.014                  | 4.38                               | 0.34                   | 0.1137                                | 0.0030                 |                | 1709                                              | 63                    | 1588                                              | 71                    | 1859                                                 | 47                    | 132                         | 55                         | a                 |
| 0.1507                             | 0.0075                 | 1.62                               | 0.29                   | 0.0779                                | 0.0072                 |                | 977                                               | 113                   | 905                                               | 42                    | 1143                                                 | 184                   | 88                          | 59                         | a                 |
| 0.0944                             | 0.0047                 | 0.863                              | 0.056                  | 0.0663                                | 0.0022                 |                | 632                                               | 31                    | 581                                               | 28                    | 816                                                  | 69                    | 143                         | 56                         | a                 |
| 0.0940                             | 0.0047                 | 0.868                              | 0.095                  | 0.0670                                | 0.0045                 |                | 635                                               | 51                    | 579                                               | 28                    | 838                                                  | 141                   | 103                         | 72                         | a                 |
| 0.1870                             | 0.0093                 | 2.31                               | 0.16                   | 0.0898                                | 0.0024                 |                | 1217                                              | 48                    | 1105                                              | 51                    | 1421                                                 | 51                    | 426                         | 171                        | a                 |
| 0.0834                             | 0.0042                 | 0.754                              | 0.045                  | 0.0656                                | 0.0019                 |                | 570                                               | 26                    | 516                                               | 25                    | 793                                                  | 60                    | 70                          | 58                         | a                 |
| 0.1167                             | 0.0058                 | 1.232                              | 0.075                  | 0.0765                                | 0.0021                 |                | 815                                               | 34                    | 712                                               | 34                    | 1109                                                 | 54                    | 87                          | 57                         | a                 |
| 0.0401                             | 0.0020                 | 0.336                              | 0.046                  | 0.0608                                | 0.0060                 |                | 294                                               | 35                    | 253                                               | 12                    | 631                                                  | 212                   | 94                          | 57                         | a                 |
| 0.0582                             | 0.0029                 | 0.52                               | 0.10                   | 0.0652                                | 0.0091                 |                | 427                                               | 70                    | 364                                               | 18                    | 781                                                  | 293                   | 156                         | 93                         | a                 |
| 0.253                              | 0.013                  | 4.35                               | 0.32                   | 0.1249                                | 0.0033                 |                | 1703                                              | 61                    | 1452                                              | 65                    | 2027                                                 | 46                    | 118                         | 75                         | a                 |
| 0.0988                             | 0.0049                 | 1.02                               | 0.46                   | 0.075                                 | 0.023                  |                | 715                                               | 231                   | 607                                               | 29                    | 1069                                                 | 626                   | 105                         | 73                         | a                 |
| 0.01799                            | 0.00090                | 0.145                              | 0.026                  | 0.0583                                | 0.0078                 |                | 137                                               | 23                    | 115                                               | 6                     | 540                                                  | 291                   | 139                         | 81                         | a                 |
| 0.1900                             | 0.0095                 | 2.74                               | 1.26                   | 0.105                                 | 0.029                  |                | 1340                                              | 341                   | 1121                                              | 52                    | 1710                                                 | 501                   | 117                         | 88                         | a                 |
| 0.0203                             | 0.0010                 | 0.169                              | 0.011                  | 0.0601                                | 0.0023                 |                | 158                                               | 9                     | 130                                               | 6                     | 607                                                  | 83                    | 144                         | 86                         | a                 |
| 0.0754                             | 0.0038                 | 0.770                              | 0.095                  | 0.0740                                | 0.0060                 |                | 580                                               | 55                    | 469                                               | 23                    | 1043                                                 | 163                   | 152                         | 73                         | a                 |
| 0.1492                             | 0.0075                 | 2.01                               | 0.16                   | 0.0980                                | 0.0036                 |                | 1120                                              | 53                    | 896                                               | 42                    | 1586                                                 | 68                    | 180                         | 78                         | a                 |
| 0.1198                             | 0.0060                 | 1.55                               | 0.12                   | 0.0940                                | 0.0039                 |                | 951                                               | 48                    | 730                                               | 35                    | 1507                                                 | 78                    | 102                         | 91                         | r                 |
| 0.1198                             | 0.0060                 | 1.55                               | 0.12                   | 0.0940                                | 0.0039                 |                | 951                                               | 48                    | 730                                               | 35                    | 1507                                                 | 78                    | 122                         | 75                         | r                 |
| 0.0656                             | 0.0033                 | 0.694                              | 0.050                  | 0.0767                                | 0.0032                 |                | 535                                               | 30                    | 409                                               | 20                    | 1114                                                 | 83                    |                             |                            | r                 |
| 0.286                              | 0.014                  | 7.05                               | 0.57                   | 0.1791                                | 0.0051                 |                | 2118                                              | 71                    | 1619                                              | 72                    | 2645                                                 | 47                    | 138                         | 60                         | r                 |
| 0.0213                             | 0.0011                 | 0.217                              | 0.076                  | 0.074                                 | 0.020                  |                | 199                                               | 63                    | 136                                               | 7                     | 1037                                                 | 534                   | 93                          | 59                         | r                 |
| 0.1007                             | 0.0050                 | 1.46                               | 0.11                   | 0.1053                                | 0.0047                 |                | 915                                               | 47                    | 619                                               | 30                    | 1719                                                 | 82                    | 110                         | 72                         | r                 |
| 0.0696                             | 0.0035                 | 0.95                               | 0.45                   | 0.099                                 | 0.033                  |                | 676                                               | 233                   | 434                                               | 21                    | 1598                                                 | 633                   | 95                          | 40                         | r                 |
| 0.0597                             | 0.0030                 | 1.93                               | 0.17                   | 0.234                                 | 0.014                  |                | 1091                                              | 60                    | 374                                               | 18                    | 3081                                                 | 95                    | 110                         | 49                         | r                 |

18. Negro River, Brazil (2.4352°S, 60.0622°W)

| $^{206}\text{Pb}^*/^{238}\text{U}$ | $\pm 2\sigma$<br>(abs) | $^{207}\text{Pb}^*/^{235}\text{U}$ | $\pm 2\sigma$<br>(abs) | $^{207}\text{Pb}^*/^{206}\text{Pb}^*$ | $\pm 2\sigma$<br>(abs) | corr.<br>coef. | $^{206}\text{Pb}^*/^{238}\text{U}$<br>age<br>(Ma) | $\pm 2\sigma$<br>(Ma) | $^{207}\text{Pb}^*/^{235}\text{U}$<br>age<br>(Ma) | $\pm 2\sigma$<br>(Ma) | $^{207}\text{Pb}^*/^{206}\text{Pb}^*$<br>age<br>(Ma) | $\pm 2\sigma$<br>(Ma) | Length<br>( $\mu\text{m}$ ) | Width<br>( $\mu\text{m}$ ) | Accept/<br>Reject |
|------------------------------------|------------------------|------------------------------------|------------------------|---------------------------------------|------------------------|----------------|---------------------------------------------------|-----------------------|---------------------------------------------------|-----------------------|------------------------------------------------------|-----------------------|-----------------------------|----------------------------|-------------------|
| 0.1476                             | 0.0052                 | 1.390                              | 0.060                  | 0.0683                                | 0.0022                 | 0.819          | 884                                               | 26                    | 888                                               | 29                    | 877                                                  | 67                    |                             |                            | a                 |
| 0.0379                             | 0.0027                 | 0.266                              | 0.028                  | 0.0509                                | 0.0031                 | 0.911          | 239                                               | 22                    | 240                                               | 17                    | 237                                                  | 138                   |                             |                            | a                 |
| 0.0449                             | 0.0024                 | 0.294                              | 0.037                  | 0.0475                                | 0.0082                 | 0.824          | 262                                               | 29                    | 283                                               | 15                    | 74                                                   | 408                   |                             |                            | a                 |
| 0.1526                             | 0.0050                 | 1.394                              | 0.053                  | 0.0663                                | 0.0017                 | 0.855          | 887                                               | 23                    | 916                                               | 28                    | 815                                                  | 53                    |                             |                            | a                 |
| 0.0953                             | 0.0029                 | 0.596                              | 0.023                  | 0.0453                                | 0.0016                 | 0.749          | 475                                               | 15                    | 587                                               | 17                    |                                                      |                       |                             |                            | a                 |
| 0.0749                             | 0.0024                 | 0.367                              | 0.030                  | 0.0355                                | 0.0039                 | 0.895          | 318                                               | 22                    | 466                                               | 14                    |                                                      |                       |                             |                            | r                 |
| 0.03695                            | 0.00099                | 0.1904                             | 0.0070                 | 0.0374                                | 0.0015                 | 0.834          | 177                                               | 6                     | 234                                               | 6                     |                                                      |                       |                             |                            | a                 |
| 0.289                              | 0.021                  | 4.00                               | 0.45                   | 0.1003                                | 0.0036                 | 0.931          | 1634                                              | 92                    | 1638                                              | 107                   | 1630                                                 | 67                    | 107                         | 67                         | a                 |
| 0.1468                             | 0.0047                 | 1.341                              | 0.053                  | 0.0662                                | 0.0020                 | 0.817          | 864                                               | 23                    | 883                                               | 26                    | 814                                                  | 63                    | 180                         | 65                         | a                 |
| 0.2249                             | 0.0077                 | 2.62                               | 0.11                   | 0.0846                                | 0.0022                 | 0.877          | 1307                                              | 31                    | 1308                                              | 40                    | 1306                                                 | 52                    | 118                         | 108                        | a                 |
| 0.0862                             | 0.0025                 | 0.506                              | 0.022                  | 0.0426                                | 0.0019                 | 0.626          | 416                                               | 15                    | 533                                               | 15                    |                                                      |                       | 74                          | 55                         | a                 |
| 0.0358                             | 0.0010                 | 0.1512                             | 0.0073                 | 0.0306                                | 0.0018                 | 0.798          | 143                                               | 6                     | 227                                               | 6                     |                                                      |                       | 117                         | 62                         | r                 |
| 0.03625                            | 0.00097                | 0.2312                             | 0.0078                 | 0.0462                                | 0.0015                 | 0.850          | 211                                               | 6                     | 230                                               | 6                     | 11                                                   | 76                    | 115                         | 96                         | a                 |
| 0.1261                             | 0.0043                 | 0.968                              | 0.038                  | 0.0557                                | 0.0015                 | 0.849          | 688                                               | 20                    | 766                                               | 24                    | 441                                                  | 59                    | 155                         | 85                         | a                 |
| 0.1312                             | 0.0053                 | 1.043                              | 0.058                  | 0.0577                                | 0.0029                 | 0.757          | 726                                               | 29                    | 795                                               | 30                    | 517                                                  | 111                   | 123                         | 66                         | a                 |
| 0.1057                             | 0.0071                 | 0.89                               | 0.25                   | 0.061                                 | 0.013                  | 0.958          | 648                                               | 135                   | 647                                               | 41                    | 650                                                  | 452                   | 96                          | 80                         | a                 |
| 0.1251                             | 0.0038                 | 0.746                              | 0.033                  | 0.0433                                | 0.0019                 | 0.779          | 566                                               | 19                    | 760                                               | 22                    |                                                      |                       | 107                         | 73                         | a                 |
| 0.1341                             | 0.0042                 | 1.078                              | 0.039                  | 0.0583                                | 0.0015                 | 0.846          | 743                                               | 19                    | 811                                               | 24                    | 542                                                  | 55                    | 135                         | 93                         | a                 |
| 0.1379                             | 0.0043                 | 1.026                              | 0.040                  | 0.0539                                | 0.0016                 | 0.838          | 717                                               | 20                    | 833                                               | 24                    | 369                                                  | 67                    | 123                         | 74                         | a                 |
| 0.1271                             | 0.0038                 | 0.985                              | 0.035                  | 0.0562                                | 0.0014                 | 0.839          | 696                                               | 18                    | 771                                               | 22                    | 460                                                  | 55                    | 107                         | 76                         | a                 |
| 0.0513                             | 0.0039                 | 0.236                              | 0.019                  | 0.0333                                | 0.0013                 | 0.841          | 215                                               | 16                    | 323                                               | 24                    | -850                                                 | 111                   | 162                         | 142                        | r                 |
| 0.280                              | 0.011                  | 3.71                               | 0.25                   | 0.0962                                | 0.0035                 | 0.870          | 1573                                              | 53                    | 1589                                              | 55                    | 1551                                                 | 68                    | 139                         | 77                         | a                 |
| 0.0552                             | 0.0019                 | 0.120                              | 0.020                  | 0.0157                                | 0.0039                 | 0.833          | 115                                               | 19                    | 347                                               | 12                    | -3862                                                | 1494                  | 103                         | 93                         | r                 |
| 0.1251                             | 0.0039                 | 0.828                              | 0.031                  | 0.0480                                | 0.0013                 | 0.851          | 613                                               | 17                    | 760                                               | 22                    | 99                                                   | 64                    | 78                          | 72                         | a                 |
| 0.0857                             | 0.0031                 | 0.536                              | 0.023                  | 0.0454                                | 0.0016                 | 0.765          | 436                                               | 16                    | 530                                               | 18                    |                                                      |                       | 127                         | 69                         | a                 |
| 0.1291                             | 0.0049                 | 1.057                              | 0.082                  | 0.0594                                | 0.0053                 | 0.947          | 732                                               | 40                    | 783                                               | 28                    | 581                                                  | 195                   | 108                         | 99                         | a                 |
| 0.1934                             | 0.0071                 | 1.986                              | 0.087                  | 0.0745                                | 0.0019                 | 0.886          | 1111                                              | 29                    | 1140                                              | 39                    | 1054                                                 | 52                    | 96                          | 73                         | a                 |
| 0.0636                             | 0.0021                 | 0.479                              | 0.020                  | 0.0546                                | 0.0020                 | 0.507          | 397                                               | 14                    | 397                                               | 13                    | 397                                                  | 84                    | 85                          | 56                         | a                 |
| 0.1915                             | 0.0098                 | 1.600                              | 0.091                  | 0.0606                                | 0.0017                 | 0.927          | 970                                               | 35                    | 1130                                              | 53                    | 625                                                  | 59                    | 99                          | 76                         | a                 |
| 0.1883                             | 0.0085                 | 1.73                               | 0.10                   | 0.0666                                | 0.0028                 | 0.860          | 1020                                              | 37                    | 1112                                              | 46                    | 826                                                  | 88                    | 152                         | 60                         | a                 |
| 0.178                              | 0.010                  | 1.498                              | 0.096                  | 0.0609                                | 0.0020                 | 0.914          | 930                                               | 39                    | 1058                                              | 56                    | 637                                                  | 72                    | 87                          | 82                         | a                 |
| 0.250                              | 0.052                  | 3.15                               | 2.78                   | 0.091                                 | 0.016                  | 0.875          | 1444                                              | 681                   | 1440                                              | 268                   | 1450                                                 | 340                   | 120                         | 72                         | a                 |
| 0.01878                            | 0.00056                | 0.0982                             | 0.0053                 | 0.0379                                | 0.0027                 | 0.589          | 95                                                | 5                     | 120                                               | 4                     |                                                      |                       | 104                         | 86                         | a                 |
| 0.1252                             | 0.0066                 | 0.969                              | 0.061                  | 0.0561                                | 0.0025                 | 0.834          | 688                                               | 31                    | 761                                               | 38                    | 457                                                  | 100                   | 108                         | 78                         | a                 |
| 0.273                              | 0.011                  | 3.42                               | 0.16                   | 0.0910                                | 0.0023                 | 0.913          | 1510                                              | 36                    | 1555                                              | 55                    | 1447                                                 | 47                    | 117                         | 109                        | a                 |
| 0.1405                             | 0.0098                 | 1.267                              | 0.099                  | 0.0654                                | 0.0029                 | 0.874          | 831                                               | 44                    | 847                                               | 56                    | 787                                                  | 93                    | 100                         | 42                         | a                 |
| 0.1402                             | 0.0046                 | 1.113                              | 0.043                  | 0.0576                                | 0.0015                 | 0.861          | 760                                               | 21                    | 846                                               | 26                    | 514                                                  | 56                    | 164                         | 100                        | a                 |
| 0.1721                             | 0.0068                 | 1.75                               | 0.11                   | 0.0735                                | 0.0035                 | 0.784          | 1025                                              | 42                    | 1024                                              | 37                    | 1029                                                 | 95                    | 133                         | 60                         | a                 |
| 0.0496                             | 0.0014                 | 0.2273                             | 0.0095                 | 0.0333                                | 0.0015                 | 0.869          | 208                                               | 8                     | 312                                               | 9                     |                                                      |                       | 155                         | 92                         | r                 |
| 0.1410                             | 0.0045                 | 1.179                              | 0.044                  | 0.0607                                | 0.0015                 | 0.855          | 791                                               | 20                    | 850                                               | 26                    | 627                                                  | 54                    | 144                         | 68                         | a                 |
| 0.0984                             | 0.0033                 | 0.611                              | 0.027                  | 0.0450                                | 0.0018                 | 0.751          | 484                                               | 17                    | 605                                               | 19                    |                                                      |                       | 130                         | 88                         | a                 |
| 0.0891                             | 0.0032                 | 0.551                              | 0.023                  | 0.0449                                | 0.0014                 | 0.798          | 446                                               | 15                    | 550                                               | 19                    |                                                      |                       | 120                         | 87                         | a                 |
| 0.273                              | 0.010                  | 3.61                               | 0.17                   | 0.0960                                | 0.0025                 | 0.899          | 1552                                              | 37                    | 1555                                              | 52                    | 1547                                                 | 50                    | 99                          | 95                         | a                 |
| 0.1690                             | 0.0057                 | 1.404                              | 0.055                  | 0.0603                                | 0.0015                 | 0.886          | 890                                               | 23                    | 1006                                              | 32                    | 613                                                  | 54                    | 177                         | 91                         | a                 |
| 0.1340                             | 0.0062                 | 0.949                              | 0.058                  | 0.0514                                | 0.0028                 | 0.804          | 678                                               | 30                    | 811                                               | 35                    | 258                                                  | 123                   | 181                         | 77                         | a                 |
| 0.1574                             | 0.0060                 | 1.254                              | 0.054                  | 0.0578                                | 0.0014                 | 0.895          | 825                                               | 24                    | 942                                               | 33                    | 521                                                  | 55                    | 127                         | 85                         | a                 |
| 0.1611                             | 0.0064                 | 1.144                              | 0.057                  | 0.0515                                | 0.0019                 | 0.871          | 774                                               | 27                    | 963                                               | 36                    | 263                                                  | 84                    | 112                         | 93                         | a                 |
| 0.0447                             | 0.0013                 | 0.2170                             | 0.0077                 | 0.0352                                | 0.0011                 | 0.580          | 199                                               | 6                     | 282                                               | 8                     |                                                      |                       | 221                         | 93                         | a                 |
| 0.316                              | 0.015                  | 3.54                               | 0.19                   | 0.0812                                | 0.0021                 | 0.941          | 1536                                              | 43                    | 1772                                              | 74                    | 1226                                                 | 51                    | 97                          | 58                         | a                 |
| 0.0880                             | 0.0026                 | 0.541                              | 0.019                  | 0.0446                                | 0.0012                 | 0.798          | 439                                               | 13                    | 544                                               | 16                    |                                                      |                       | 160                         | 118                        | a                 |
| 0.2194                             | 0.0099                 | 1.676                              | 0.084                  | 0.0554                                | 0.0014                 | 0.936          | 1000                                              | 32                    | 1279                                              | 52                    | 429                                                  | 58                    | 121                         | 66                         | a                 |

| $^{206}\text{Pb}^*/^{238}\text{U}$ | $\pm 2\sigma$<br>(abs) | $^{207}\text{Pb}^*/^{235}\text{U}$ | $\pm 2\sigma$<br>(abs) | $^{207}\text{Pb}^*/^{206}\text{Pb}^*$ | $\pm 2\sigma$<br>(abs) | corr.<br>coef. | $^{206}\text{Pb}^*/^{238}\text{U}$<br>age<br>(Ma) | $\pm 2\sigma$<br>(Ma) | $^{207}\text{Pb}^*/^{235}\text{U}$<br>age<br>(Ma) | $\pm 2\sigma$<br>(Ma) | $^{207}\text{Pb}^*/^{206}\text{Pb}^*$<br>age<br>(Ma) | $\pm 2\sigma$<br>(Ma) | Length<br>( $\mu\text{m}$ ) | Width<br>( $\mu\text{m}$ ) | Accept/<br>Reject |
|------------------------------------|------------------------|------------------------------------|------------------------|---------------------------------------|------------------------|----------------|---------------------------------------------------|-----------------------|---------------------------------------------------|-----------------------|------------------------------------------------------|-----------------------|-----------------------------|----------------------------|-------------------|
| 0.0529                             | 0.0016                 | 0.2610                             | 0.0093                 | 0.0358                                | 0.0011                 | 0.662          | 235                                               | 8                     | 333                                               | 10                    |                                                      |                       | 140                         | 83                         | a                 |
| 0.315                              | 0.019                  | 4.38                               | 0.29                   | 0.1008                                | 0.0025                 | 0.946          | 1709                                              | 54                    | 1767                                              | 95                    | 1640                                                 | 46                    | 94                          | 65                         | a                 |
| 0.252                              | 0.012                  | 2.40                               | 0.14                   | 0.0691                                | 0.0027                 | 0.903          | 1242                                              | 41                    | 1448                                              | 60                    | 902                                                  | 80                    | 96                          | 56                         | a                 |
| 0.1090                             | 0.0060                 | 0.927                              | 0.075                  | 0.0616                                | 0.0025                 | 0.823          | 666                                               | 40                    | 667                                               | 35                    | 662                                                  | 86                    | 164                         | 66                         | a                 |
| 0.345                              | 0.015                  | 4.37                               | 0.27                   | 0.0919                                | 0.0038                 | 0.898          | 1707                                              | 50                    | 1910                                              | 74                    | 1465                                                 | 79                    | 120                         | 50                         | a                 |
| 0.157                              | 0.012                  | 1.52                               | 0.47                   | 0.0700                                | 0.0091                 | 0.649          | 937                                               | 188                   | 941                                               | 64                    | 928                                                  | 266                   | 116                         | 76                         | a                 |
| 0.286                              | 0.011                  | 2.85                               | 0.13                   | 0.0723                                | 0.0019                 | 0.925          | 1368                                              | 34                    | 1619                                              | 55                    | 995                                                  | 54                    | 70                          | 45                         | a                 |
| 0.31                               | 0.72                   | 4.671                              | 33.085                 | 0.110                                 | 0.019                  | 0.989          | 1762                                              | 5924                  | 1732                                              | 3535                  | 1798                                                 | 310                   | 110                         | 76                         | r                 |
| 0.2159                             | 0.0077                 | 2.50                               | 0.12                   | 0.0840                                | 0.0024                 | 0.867          | 1272                                              | 34                    | 1260                                              | 41                    | 1292                                                 | 57                    | 100                         | 60                         | a                 |
| 0.228                              | 0.031                  | 2.856                              | 2.023                  | 0.091                                 | 0.012                  | 0.844          | 1370                                              | 533                   | 1325                                              | 161                   | 1442                                                 | 253                   | 121                         | 31                         | a                 |
| 0.1600                             | 0.0094                 | 1.57                               | 0.16                   | 0.0710                                | 0.0041                 | 0.815          | 957                                               | 65                    | 957                                               | 52                    | 958                                                  | 119                   | 110                         | 92                         | a                 |
| 0.228                              | 0.024                  | 2.75                               | 0.64                   | 0.0877                                | 0.0066                 | 0.889          | 1343                                              | 173                   | 1322                                              | 126                   | 1377                                                 | 144                   | 121                         | 70                         | a                 |
| 0.115                              | 0.012                  | 1.00                               | 0.13                   | 0.0631                                | 0.0021                 | 0.926          | 702                                               | 64                    | 699                                               | 71                    | 711                                                  | 70                    | 93                          | 66                         | a                 |
| 0.1765                             | 0.0062                 | 1.800                              | 0.082                  | 0.0740                                | 0.0024                 | 0.834          | 1046                                              | 30                    | 1048                                              | 34                    | 1041                                                 | 66                    | 140                         | 62                         | a                 |
| 0.186                              | 0.014                  | 1.93                               | 0.18                   | 0.0752                                | 0.0024                 | 0.929          | 1092                                              | 63                    | 1101                                              | 79                    | 1074                                                 | 65                    | 113                         | 62                         | a                 |
| 0.2279                             | 0.0098                 | 2.75                               | 0.16                   | 0.0875                                | 0.0026                 | 0.890          | 1342                                              | 42                    | 1324                                              | 52                    | 1371                                                 | 57                    | 104                         | 87                         | a                 |
| 0.2181                             | 0.0081                 | 2.52                               | 0.12                   | 0.0838                                | 0.0023                 | 0.881          | 1278                                              | 35                    | 1272                                              | 43                    | 1289                                                 | 54                    | 125                         | 78                         | a                 |
| 0.1506                             | 0.0052                 | 1.443                              | 0.084                  | 0.0695                                | 0.0037                 | 0.683          | 907                                               | 35                    | 904                                               | 29                    | 914                                                  | 109                   | 94                          | 69                         | a                 |
| 0.2059                             | 0.0084                 | 2.29                               | 0.20                   | 0.0808                                | 0.0044                 | 0.779          | 1210                                              | 63                    | 1207                                              | 45                    | 1216                                                 | 108                   | 111                         | 45                         | a                 |
| 0.0453                             | 0.0016                 | 0.319                              | 0.014                  | 0.0510                                | 0.0019                 | 0.888          | 281                                               | 11                    | 286                                               | 10                    | 241                                                  | 88                    | 163                         | 67                         | a                 |
| 0.1590                             | 0.0077                 | 1.55                               | 0.10                   | 0.0706                                | 0.0022                 | 0.878          | 950                                               | 41                    | 951                                               | 43                    | 946                                                  | 65                    | 95                          | 63                         | a                 |
| 0.099                              | 0.010                  | 0.82                               | 0.11                   | 0.0599                                | 0.0020                 | 0.916          | 606                                               | 61                    | 608                                               | 59                    | 601                                                  | 71                    | 126                         | 100                        | a                 |
| 0.176                              | 0.033                  | 1.80                               | 0.49                   | 0.0741                                | 0.0037                 | 0.953          | 1044                                              | 179                   | 1045                                              | 183                   | 1044                                                 | 101                   | 136                         | 76                         | a                 |
| 0.162                              | 0.015                  | 1.59                               | 0.25                   | 0.0714                                | 0.0059                 | 0.836          | 966                                               | 97                    | 966                                               | 83                    | 968                                                  | 168                   | 124                         | 72                         | a                 |
| 0.1582                             | 0.0056                 | 1.547                              | 0.085                  | 0.0709                                | 0.0029                 | 0.780          | 949                                               | 34                    | 947                                               | 31                    | 956                                                  | 83                    | 135                         | 78                         | a                 |
| 0.1211                             | 0.0039                 | 1.047                              | 0.040                  | 0.0627                                | 0.0017                 | 0.806          | 727                                               | 20                    | 737                                               | 22                    | 698                                                  | 58                    | 91                          | 70                         | a                 |
| 0.2296                             | 0.0099                 | 2.71                               | 0.17                   | 0.0855                                | 0.0037                 | 0.845          | 1330                                              | 47                    | 1332                                              | 52                    | 1327                                                 | 84                    | 127                         | 58                         | a                 |
| 0.230                              | 0.036                  | 2.76                               | 1.90                   | 0.087                                 | 0.049                  | 0.979          | 1345                                              | 512                   | 1336                                              | 187                   | 1360                                                 | 1093                  | 79                          | 76                         | a                 |
| 0.124                              | 0.028                  | 1.11                               | 1.32                   | 0.065                                 | 0.055                  | 0.966          | 756                                               | 636                   | 752                                               | 163                   | 769                                                  | 1787                  | 116                         | 70                         | a                 |
| 0.306                              | 0.019                  | 4.43                               | 0.29                   | 0.1048                                | 0.0028                 | 0.938          | 1717                                              | 54                    | 1722                                              | 92                    | 1711                                                 | 49                    | 103                         | 67                         | a                 |
| 0.1780                             | 0.0065                 | 1.822                              | 0.082                  | 0.0742                                | 0.0020                 | 0.867          | 1053                                              | 29                    | 1056                                              | 35                    | 1048                                                 | 55                    | 136                         | 90                         | a                 |
| 0.0319                             | 0.0015                 | 0.220                              | 0.028                  | 0.0501                                | 0.0077                 | 0.784          | 202                                               | 24                    | 203                                               | 10                    | 199                                                  | 357                   | 122                         | 58                         | a                 |
| 0.1134                             | 0.0036                 | 0.973                              | 0.047                  | 0.0622                                | 0.0030                 | 0.614          | 690                                               | 24                    | 693                                               | 21                    | 681                                                  | 102                   | 84                          | 60                         | a                 |
| 0.177                              | 0.012                  | 1.83                               | 0.16                   | 0.0747                                | 0.0023                 | 0.921          | 1055                                              | 56                    | 1052                                              | 66                    | 1061                                                 | 61                    | 110                         | 95                         | a                 |
| 0.1763                             | 0.0061                 | 1.785                              | 0.081                  | 0.0734                                | 0.0022                 | 0.849          | 1040                                              | 29                    | 1047                                              | 33                    | 1025                                                 | 60                    | 100                         | 68                         | a                 |
| 0.2110                             | 0.0072                 | 2.39                               | 0.11                   | 0.0821                                | 0.0023                 | 0.865          | 1239                                              | 33                    | 1234                                              | 39                    | 1247                                                 | 56                    | 108                         | 60                         | a                 |
| 0.0367                             | 0.0017                 | 0.234                              | 0.013                  | 0.0462                                | 0.0021                 | 0.866          | 214                                               | 11                    | 233                                               | 10                    | 9                                                    | 112                   | 97                          | 87                         | a                 |
| 0.179                              | 0.015                  | 1.84                               | 0.19                   | 0.0749                                | 0.0023                 | 0.933          | 1061                                              | 68                    | 1059                                              | 80                    | 1064                                                 | 63                    | 152                         | 77                         | a                 |
| 0.209                              | 0.017                  | 2.32                               | 0.23                   | 0.0806                                | 0.0025                 | 0.940          | 1220                                              | 72                    | 1224                                              | 93                    | 1212                                                 | 60                    | 115                         | 87                         | a                 |
| 0.1910                             | 0.0074                 | 2.03                               | 0.10                   | 0.0771                                | 0.0022                 | 0.873          | 1126                                              | 35                    | 1127                                              | 40                    | 1123                                                 | 58                    | 173                         | 76                         | a                 |
| 0.0813                             | 0.0046                 | 0.648                              | 0.048                  | 0.0578                                | 0.0019                 | 0.820          | 508                                               | 30                    | 504                                               | 27                    | 524                                                  | 72                    | 132                         | 52                         | a                 |
| 0.1328                             | 0.0053                 | 1.210                              | 0.055                  | 0.0661                                | 0.0019                 | 0.842          | 805                                               | 25                    | 804                                               | 30                    | 809                                                  | 61                    | 114                         | 48                         | a                 |
| 0.1802                             | 0.0076                 | 1.84                               | 0.11                   | 0.0740                                | 0.0023                 | 0.870          | 1059                                              | 40                    | 1068                                              | 41                    | 1042                                                 | 64                    | 89                          | 62                         | a                 |
| 0.1687                             | 0.0079                 | 1.70                               | 0.12                   | 0.0732                                | 0.0043                 | 0.766          | 1010                                              | 47                    | 1005                                              | 44                    | 1020                                                 | 119                   | 79                          | 67                         | a                 |
| 0.2142                             | 0.0077                 | 2.45                               | 0.11                   | 0.0828                                | 0.0023                 | 0.877          | 1256                                              | 32                    | 1251                                              | 41                    | 1266                                                 | 53                    | 76                          | 76                         | a                 |
| 0.138                              | 0.013                  | 1.30                               | 0.69                   | 0.068                                 | 0.028                  | 0.967          | 847                                               | 304                   | 835                                               | 74                    | 880                                                  | 838                   | 100                         | 68                         | a                 |
| 0.184                              | 0.014                  | 1.91                               | 0.22                   | 0.0749                                | 0.0036                 | 0.889          | 1083                                              | 76                    | 1091                                              | 74                    | 1067                                                 | 98                    | 125                         | 54                         | a                 |
| 0.1498                             | 0.0093                 | 1.43                               | 0.10                   | 0.0691                                | 0.0021                 | 0.906          | 901                                               | 43                    | 900                                               | 52                    | 903                                                  | 61                    | 88                          | 58                         | a                 |
| 0.219                              | 0.016                  | 2.49                               | 0.31                   | 0.0827                                | 0.0077                 | 0.797          | 1270                                              | 89                    | 1274                                              | 85                    | 1263                                                 | 183                   | 106                         | 75                         | a                 |
| 0.153                              | 0.017                  | 1.48                               | 0.21                   | 0.0701                                | 0.0023                 | 0.944          | 924                                               | 88                    | 921                                               | 96                    | 931                                                  | 66                    | 84                          | 45                         | a                 |
| 0.1847                             | 0.0076                 | 1.92                               | 0.11                   | 0.0754                                | 0.0023                 | 0.872          | 1089                                              | 37                    | 1093                                              | 41                    | 1080                                                 | 62                    | 125                         | 56                         | a                 |

| $^{206}\text{Pb}^*/^{238}\text{U}$ | $\pm 2\sigma$<br>(abs) | $^{207}\text{Pb}^*/^{235}\text{U}$ | $\pm 2\sigma$<br>(abs) | $^{207}\text{Pb}^*/^{206}\text{Pb}^*$ | $\pm 2\sigma$<br>(abs) | corr.<br>coef. | $^{206}\text{Pb}^*/^{238}\text{U}$<br>age<br>(Ma) | $\pm 2\sigma$<br>(Ma) | $^{207}\text{Pb}^*/^{235}\text{U}$<br>age<br>(Ma) | $\pm 2\sigma$<br>(Ma) | $^{207}\text{Pb}^*/^{206}\text{Pb}^*$<br>age<br>(Ma) | $\pm 2\sigma$<br>(Ma) | Length<br>( $\mu\text{m}$ ) | Width<br>( $\mu\text{m}$ ) | Accept/<br>Reject |
|------------------------------------|------------------------|------------------------------------|------------------------|---------------------------------------|------------------------|----------------|---------------------------------------------------|-----------------------|---------------------------------------------------|-----------------------|------------------------------------------------------|-----------------------|-----------------------------|----------------------------|-------------------|
| 0.211                              | 0.014                  | 3.24                               | 0.23                   | 0.1112                                | 0.0029                 | 0.916          | 1467                                              | 56                    | 1237                                              | 75                    | 1819                                                 | 47                    | 165                         | 76                         | a                 |
| 0.197                              | 0.010                  | 2.95                               | 0.17                   | 0.1088                                | 0.0029                 | 0.879          | 1396                                              | 44                    | 1158                                              | 54                    | 1780                                                 | 49                    | 136                         | 66                         | a                 |
| 0.230                              | 0.012                  | 4.08                               | 0.23                   | 0.1288                                | 0.0033                 | 0.883          | 1651                                              | 47                    | 1334                                              | 60                    | 2082                                                 | 45                    | 103                         | 62                         | a                 |
| 0.2032                             | 0.0093                 | 3.24                               | 0.17                   | 0.1156                                | 0.0029                 | 0.871          | 1466                                              | 41                    | 1192                                              | 50                    | 1889                                                 | 45                    | 129                         | 66                         | a                 |
| 0.1713                             | 0.0072                 | 2.23                               | 0.11                   | 0.0946                                | 0.0024                 | 0.862          | 1192                                              | 34                    | 1019                                              | 39                    | 1521                                                 | 47                    | 125                         | 56                         | a                 |
| 0.2038                             | 0.0094                 | 3.67                               | 0.20                   | 0.1306                                | 0.0034                 | 0.852          | 1565                                              | 43                    | 1196                                              | 50                    | 2107                                                 | 45                    | 115                         | 56                         | r                 |
| 0.1587                             | 0.0065                 | 2.039                              | 0.098                  | 0.0932                                | 0.0024                 | 0.849          | 1129                                              | 33                    | 950                                               | 36                    | 1491                                                 | 48                    | 165                         | 76                         | a                 |
| 0.205                              | 0.010                  | 3.39                               | 0.19                   | 0.1198                                | 0.0030                 | 0.877          | 1501                                              | 43                    | 1202                                              | 54                    | 1953                                                 | 45                    | 128                         | 83                         | a                 |
| 0.0577                             | 0.0021                 | 0.602                              | 0.068                  | 0.076                                 | 0.011                  | 0.870          | 478                                               | 43                    | 361                                               | 13                    | 1087                                                 | 295                   | 116                         | 68                         | r                 |
| 0.201                              | 0.015                  | 3.35                               | 0.28                   | 0.1209                                | 0.0035                 | 0.906          | 1492                                              | 64                    | 1179                                              | 83                    | 1969                                                 | 52                    | 84                          | 62                         | a                 |
| 0.1792                             | 0.0089                 | 2.22                               | 0.13                   | 0.0897                                | 0.0025                 | 0.885          | 1186                                              | 40                    | 1062                                              | 49                    | 1420                                                 | 52                    | 140                         | 62                         | a                 |
| 0.224                              | 0.011                  | 3.72                               | 0.21                   | 0.1205                                | 0.0030                 | 0.890          | 1576                                              | 45                    | 1303                                              | 59                    | 1964                                                 | 44                    | 118                         | 73                         | a                 |
| 0.1312                             | 0.0068                 | 2.14                               | 0.12                   | 0.1182                                | 0.0031                 | 0.810          | 1161                                              | 40                    | 794                                               | 39                    | 1929                                                 | 47                    | 89                          | 75                         | r                 |
| 0.2007                             | 0.0096                 | 3.35                               | 0.18                   | 0.1211                                | 0.0030                 | 0.870          | 1493                                              | 43                    | 1179                                              | 52                    | 1972                                                 | 45                    | 126                         | 76                         | a                 |
| 0.1206                             | 0.0052                 | 1.225                              | 0.060                  | 0.0737                                | 0.0019                 | 0.843          | 812                                               | 27                    | 734                                               | 30                    | 1033                                                 | 52                    | 106                         | 84                         | a                 |
| 0.223                              | 0.012                  | 3.47                               | 0.21                   | 0.1127                                | 0.0028                 | 0.901          | 1520                                              | 47                    | 1298                                              | 62                    | 1844                                                 | 45                    | 156                         | 68                         | a                 |
| 0.1686                             | 0.0068                 | 1.929                              | 0.096                  | 0.0830                                | 0.0024                 | 0.856          | 1091                                              | 33                    | 1004                                              | 38                    | 1269                                                 | 55                    | 78                          | 52                         | a                 |
| 0.256                              | 0.033                  | 3.70                               | 0.50                   | 0.1047                                | 0.0031                 | 0.961          | 1571                                              | 107                   | 1471                                              | 170                   | 1709                                                 | 54                    | 93                          | 61                         | a                 |
| 0.211                              | 0.014                  | 3.31                               | 0.24                   | 0.1136                                | 0.0028                 | 0.917          | 1483                                              | 56                    | 1235                                              | 75                    | 1858                                                 | 45                    | 154                         | 72                         | a                 |
| 0.1527                             | 0.0068                 | 1.723                              | 0.089                  | 0.0819                                | 0.0022                 | 0.865          | 1017                                              | 33                    | 916                                               | 38                    | 1243                                                 | 52                    | 122                         | 61                         | a                 |
| 0.328                              | 0.022                  | 5.57                               | 0.42                   | 0.1230                                | 0.0031                 | 0.940          | 1912                                              | 65                    | 1831                                              | 104                   | 2001                                                 | 45                    | 118                         | 48                         | a                 |
| 0.1303                             | 0.0063                 | 2.29                               | 0.35                   | 0.128                                 | 0.020                  | 0.954          | 1210                                              | 108                   | 790                                               | 36                    | 2065                                                 | 274                   | 113                         | 75                         | r                 |
| 0.156                              | 0.016                  | 2.12                               | 0.24                   | 0.0985                                | 0.0044                 | 0.886          | 1155                                              | 77                    | 934                                               | 89                    | 1596                                                 | 83                    | 138                         | 54                         | a                 |
| 0.118                              | 0.029                  | 1.82                               | 0.45                   | 0.1121                                | 0.0029                 | 0.958          | 1054                                              | 162                   | 719                                               | 167                   | 1834                                                 | 47                    | 158                         | 78                         | r                 |
| 0.257                              | 0.014                  | 4.32                               | 0.27                   | 0.1219                                | 0.0030                 | 0.914          | 1696                                              | 52                    | 1473                                              | 74                    | 1984                                                 | 44                    | 131                         | 76                         | a                 |
| 0.209                              | 0.025                  | 2.37                               | 0.29                   | 0.0822                                | 0.0027                 | 0.954          | 1235                                              | 88                    | 1225                                              | 131                   | 1251                                                 | 64                    | 128                         | 61                         | a                 |
| 0.252                              | 0.060                  | 3.94                               | 0.95                   | 0.1135                                | 0.0030                 | 0.979          | 1622                                              | 195                   | 1447                                              | 310                   | 1856                                                 | 47                    | 95                          | 54                         | a                 |
| 0.0381                             | 0.0021                 | 0.428                              | 0.052                  | 0.081                                 | 0.013                  | 0.807          | 361                                               | 37                    | 241                                               | 13                    | 1232                                                 | 306                   | 109                         | 72                         | r                 |
| 0.1744                             | 0.0086                 | 2.73                               | 0.16                   | 0.1136                                | 0.0035                 | 0.832          | 1337                                              | 43                    | 1036                                              | 47                    | 1857                                                 | 56                    | 104                         | 48                         | a                 |
| 0.339                              | 0.030                  | 8.69                               | 0.86                   | 0.1861                                | 0.0047                 | 0.937          | 2306                                              | 90                    | 1880                                              | 144                   | 2708                                                 | 41                    | 88                          | 66                         | a                 |
| 0.313                              | 0.020                  | 3.68                               | 0.30                   | 0.0854                                | 0.0033                 | 0.931          | 1568                                              | 66                    | 1754                                              | 99                    | 1324                                                 | 76                    | 151                         | 50                         | a                 |
| 0.1953                             | 0.0094                 | 2.34                               | 0.13                   | 0.0870                                | 0.0023                 | 0.898          | 1225                                              | 39                    | 1150                                              | 50                    | 1360                                                 | 50                    | 136                         | 66                         | a                 |
| 0.214                              | 0.016                  | 1.98                               | 0.16                   | 0.0671                                | 0.0019                 | 0.949          | 1107                                              | 53                    | 1248                                              | 83                    | 840                                                  | 58                    | 101                         | 51                         | a                 |
| 0.116                              | 0.011                  | 0.56                               | 0.11                   | 0.0353                                | 0.0070                 | 0.717          | 454                                               | 73                    | 706                                               | 66                    |                                                      |                       | 98                          | 65                         | r                 |
| 0.1700                             | 0.0075                 | 1.712                              | 0.088                  | 0.0730                                | 0.0019                 | 0.891          | 1013                                              | 33                    | 1012                                              | 41                    | 1015                                                 | 53                    | 116                         | 78                         | a                 |
| 0.111                              | 0.015                  | 1.07                               | 0.15                   | 0.0702                                | 0.0019                 | 0.945          | 739                                               | 74                    | 676                                               | 88                    | 935                                                  | 56                    | 97                          | 72                         | a                 |
| 0.253                              | 0.015                  | 3.20                               | 0.22                   | 0.0917                                | 0.0025                 | 0.932          | 1456                                              | 53                    | 1453                                              | 79                    | 1461                                                 | 51                    | 97                          | 72                         | a                 |
| 0.209                              | 0.010                  | 2.11                               | 0.12                   | 0.0733                                | 0.0021                 | 0.915          | 1151                                              | 39                    | 1221                                              | 55                    | 1022                                                 | 57                    | 91                          | 38                         | a                 |
| 0.221                              | 0.018                  | 3.34                               | 0.29                   | 0.1098                                | 0.0028                 | 0.938          | 1491                                              | 69                    | 1286                                              | 97                    | 1795                                                 | 46                    | 122                         | 70                         | a                 |
| 0.275                              | 0.026                  | 4.64                               | 0.47                   | 0.1226                                | 0.0031                 | 0.952          | 1757                                              | 84                    | 1564                                              | 134                   | 1994                                                 | 45                    | 131                         | 61                         | a                 |
| 0.216                              | 0.075                  | 3.55                               | 1.24                   | 0.1193                                | 0.0045                 | 0.975          | 1538                                              | 278                   | 1260                                              | 398                   | 1945                                                 | 67                    | 129                         | 61                         | a                 |
| 0.236                              | 0.012                  | 3.94                               | 0.22                   | 0.1211                                | 0.0030                 | 0.893          | 1622                                              | 45                    | 1365                                              | 60                    | 1973                                                 | 44                    | 140                         | 85                         | a                 |
| 0.285                              | 0.020                  | 4.68                               | 0.36                   | 0.1191                                | 0.0030                 | 0.938          | 1763                                              | 64                    | 1616                                              | 101                   | 1942                                                 | 45                    | 75                          | 55                         | a                 |
| 0.1216                             | 0.0056                 | 1.165                              | 0.060                  | 0.0695                                | 0.0018                 | 0.861          | 784                                               | 28                    | 740                                               | 32                    | 914                                                  | 53                    | 140                         | 81                         | a                 |
| 0.308                              | 0.058                  | 5.1923                             | 1.0028                 | 0.1221                                | 0.0033                 | 0.976          | 1851                                              | 164                   | 1733                                              | 288                   | 1987                                                 | 48                    | 120                         | 48                         | a                 |
| 0.192                              | 0.019                  | 3.30                               | 0.34                   | 0.1247                                | 0.0032                 | 0.931          | 1482                                              | 80                    | 1133                                              | 103                   | 2024                                                 | 45                    | 114                         | 61                         | r                 |
| 0.175                              | 0.019                  | 2.69                               | 0.30                   | 0.1116                                | 0.0039                 | 0.915          | 1327                                              | 83                    | 1040                                              | 103                   | 1826                                                 | 63                    | 104                         | 94                         | a                 |
| 0.211                              | 0.013                  | 3.66                               | 0.25                   | 0.1259                                | 0.0033                 | 0.895          | 1563                                              | 54                    | 1234                                              | 69                    | 2042                                                 | 47                    | 112                         | 63                         | a                 |
| 0.136                              | 0.029                  | 1.67                               | 0.43                   | 0.089                                 | 0.013                  | 0.811          | 997                                               | 164                   | 823                                               | 166                   | 1404                                                 | 282                   | 113                         | 65                         | a                 |
| 0.1251                             | 0.0061                 | 1.632                              | 0.089                  | 0.0946                                | 0.0025                 | 0.825          | 983                                               | 34                    | 760                                               | 35                    | 1521                                                 | 50                    | 104                         | 42                         | a                 |
| 0.207                              | 0.014                  | 3.23                               | 0.23                   | 0.1129                                | 0.0030                 | 0.911          | 1463                                              | 56                    | 1214                                              | 74                    | 1847                                                 | 48                    | 85                          | 82                         | a                 |

| $^{206}\text{Pb}^*/^{238}\text{U}$                   | $\pm 2\sigma$<br>(abs) | $^{207}\text{Pb}^*/^{235}\text{U}$ | $\pm 2\sigma$<br>(abs) | $^{207}\text{Pb}^*/^{206}\text{Pb}^*$ | $\pm 2\sigma$<br>(abs) | corr.<br>coef. | $^{206}\text{Pb}^*/^{238}\text{U}$<br>age<br>(Ma) | $\pm 2\sigma$<br>(Ma) | $^{207}\text{Pb}^*/^{235}\text{U}$<br>age<br>(Ma) | $\pm 2\sigma$<br>(Ma) | $^{207}\text{Pb}^*/^{206}\text{Pb}^*$<br>age<br>(Ma) | $\pm 2\sigma$<br>(Ma) | Length<br>( $\mu\text{m}$ ) | Width<br>( $\mu\text{m}$ ) | Accept/<br>Reject |
|------------------------------------------------------|------------------------|------------------------------------|------------------------|---------------------------------------|------------------------|----------------|---------------------------------------------------|-----------------------|---------------------------------------------------|-----------------------|------------------------------------------------------|-----------------------|-----------------------------|----------------------------|-------------------|
| 0.170                                                | 0.015                  | 2.21                               | 0.21                   | 0.0939                                | 0.0025                 | 0.931          | 1183                                              | 66                    | 1015                                              | 85                    | 1506                                                 | 51                    | 95                          | 50                         | a                 |
| 0.185                                                | 0.022                  | 3.37                               | 0.41                   | 0.1323                                | 0.0037                 | 0.929          | 1498                                              | 94                    | 1093                                              | 117                   | 2129                                                 | 49                    | 127                         | 105                        | r                 |
| 0.147                                                | 0.030                  | 3.69                               | 1.75                   | 0.182                                 | 0.080                  | 0.963          | 1570                                              | 379                   | 883                                               | 168                   | 2675                                                 | 730                   | 102                         | 59                         | r                 |
| 0.157                                                | 0.017                  | 2.38                               | 0.28                   | 0.1103                                | 0.0032                 | 0.923          | 1238                                              | 83                    | 939                                               | 97                    | 1804                                                 | 53                    | 129                         | 52                         | r                 |
| 0.317                                                | 0.041                  | 5.35                               | 0.71                   | 0.1223                                | 0.0032                 | 0.968          | 1877                                              | 114                   | 1776                                              | 199                   | 1991                                                 | 46                    | 91                          | 60                         | a                 |
| 0.258                                                | 0.027                  | 4.43                               | 0.50                   | 0.1244                                | 0.0050                 | 0.922          | 1717                                              | 94                    | 1480                                              | 136                   | 2020                                                 | 72                    | 89                          | 61                         | a                 |
| 0.262                                                | 0.075                  | 4.81                               | 2.71                   | 0.133                                 | 0.056                  | 0.668          | 1787                                              | 474                   | 1498                                              | 383                   | 2143                                                 | 739                   | 70                          | 42                         | a                 |
| 0.1469                                               | 0.0096                 | 1.23                               | 0.11                   | 0.0609                                | 0.0041                 | 0.815          | 816                                               | 52                    | 884                                               | 54                    | 636                                                  | 146                   | 119                         | 81                         | a                 |
| 0.228                                                | 0.026                  | 3.46                               | 0.41                   | 0.1098                                | 0.0028                 | 0.956          | 1517                                              | 94                    | 1325                                              | 138                   | 1796                                                 | 46                    | 91                          | 68                         | a                 |
| 0.182                                                | 0.034                  | 2.87                               | 0.64                   | 0.114                                 | 0.014                  | 0.832          | 1374                                              | 169                   | 1080                                              | 186                   | 1866                                                 | 219                   | 78                          | 70                         | a                 |
| 0.145                                                | 0.013                  | 1.46                               | 0.14                   | 0.0728                                | 0.0021                 | 0.931          | 913                                               | 57                    | 874                                               | 73                    | 1007                                                 | 59                    | 94                          | 56                         | a                 |
| 0.309                                                | 0.028                  | 5.08                               | 0.49                   | 0.1190                                | 0.0030                 | 0.956          | 1832                                              | 83                    | 1737                                              | 139                   | 1941                                                 | 46                    | 78                          | 48                         | a                 |
| 0.309                                                | 0.028                  | 5.08                               | 0.49                   | 0.1190                                | 0.0030                 | 0.956          | 1832                                              | 83                    | 1737                                              | 139                   | 1941                                                 | 46                    | 123                         | 86                         | a                 |
| 0.242                                                | 0.038                  | 3.23                               | 0.72                   | 0.097                                 | 0.014                  | 0.852          | 1464                                              | 173                   | 1399                                              | 199                   | 1559                                                 | 267                   | 76                          | 72                         | a                 |
| 0.179                                                | 0.015                  | 2.36                               | 0.21                   | 0.0954                                | 0.0025                 | 0.933          | 1230                                              | 64                    | 1063                                              | 84                    | 1535                                                 | 48                    | 130                         | 89                         | a                 |
| 0.1442                                               | 0.0075                 | 1.18                               | 0.14                   | 0.0593                                | 0.0067                 | 0.578          | 791                                               | 66                    | 868                                               | 42                    | 578                                                  | 244                   | 101                         | 90                         | a                 |
| 0.203                                                | 0.033                  | 3.49                               | 0.57                   | 0.1248                                | 0.0033                 | 0.958          | 1524                                              | 129                   | 1189                                              | 175                   | 2027                                                 | 47                    | 124                         | 57                         | a                 |
| 0.0694                                               | 0.0037                 | 0.533                              | 0.032                  | 0.0557                                | 0.0021                 | 0.747          | 434                                               | 21                    | 433                                               | 22                    | 439                                                  | 82                    | 160                         | 70                         | a                 |
| 0.0738                                               | 0.0043                 | 0.537                              | 0.034                  | 0.0527                                | 0.0017                 | 0.822          | 436                                               | 22                    | 459                                               | 26                    | 318                                                  | 74                    | 73                          | 50                         | a                 |
| 0.202                                                | 0.026                  | 3.02                               | 0.49                   | 0.108                                 | 0.010                  | 0.840          | 1413                                              | 125                   | 1188                                              | 142                   | 1772                                                 | 172                   | 101                         | 90                         | a                 |
| 0.1391                                               | 0.0060                 | 1.410                              | 0.072                  | 0.0735                                | 0.0021                 | 0.855          | 893                                               | 30                    | 839                                               | 34                    | 1029                                                 | 57                    | 124                         | 57                         | a                 |
| 0.200                                                | 0.011                  | 2.33                               | 0.15                   | 0.0843                                | 0.0024                 | 0.909          | 1220                                              | 44                    | 1176                                              | 59                    | 1298                                                 | 55                    | 160                         | 70                         | a                 |
| 0.1329                                               | 0.0073                 | 1.68                               | 0.11                   | 0.0915                                | 0.0030                 | 0.829          | 1000                                              | 40                    | 804                                               | 42                    | 1458                                                 | 62                    | 101                         | 59                         | a                 |
| 0.229                                                | 0.015                  | 3.41                               | 0.24                   | 0.1080                                | 0.0030                 | 0.916          | 1506                                              | 56                    | 1328                                              | 77                    | 1767                                                 | 50                    | 98                          | 67                         | a                 |
| 0.232                                                | 0.022                  | 4.00                               | 0.40                   | 0.1248                                | 0.0032                 | 0.942          | 1634                                              | 82                    | 1347                                              | 117                   | 2026                                                 | 45                    | 106                         | 56                         | a                 |
| 0.1717                                               | 0.0087                 | 1.74                               | 0.10                   | 0.0733                                | 0.0021                 | 0.897          | 1022                                              | 38                    | 1022                                              | 48                    | 1022                                                 | 59                    | 117                         | 56                         | a                 |
| 0.196                                                | 0.021                  | 3.34                               | 0.37                   | 0.1234                                | 0.0031                 | 0.940          | 1491                                              | 86                    | 1156                                              | 113                   | 2006                                                 | 44                    | 125                         | 54                         | a                 |
| 0.258                                                | 0.048                  | 3.40                               | 0.69                   | 0.0956                                | 0.0065                 | 0.943          | 1505                                              | 159                   | 1480                                              | 246                   | 1540                                                 | 129                   | 89                          | 57                         | a                 |
| <b>19. Negro River, Brazil (3.1807°S, 60.0054°W)</b> |                        |                                    |                        |                                       |                        |                |                                                   |                       |                                                   |                       |                                                      |                       |                             |                            |                   |
| 0.1533                                               | 0.0077                 | 1.420                              | 0.082                  | 0.0672                                | 0.0028                 |                | 897                                               | 33                    | 919                                               | 43                    | 843                                                  | 86                    | 123                         | 61                         | a                 |
| 0.1512                                               | 0.0076                 | 2.21                               | 0.13                   | 0.1062                                | 0.0044                 |                | 1186                                              | 39                    | 908                                               | 42                    | 1736                                                 | 75                    | 294                         | 102                        | r                 |
| 0.820                                                | 0.041                  | 13.19                              | 0.45                   | 0.1167                                | 0.0045                 |                | 2693                                              | 30                    | 3861                                              | 147                   | 1906                                                 | 70                    | 161                         | 52                         | r                 |
| 0.291                                                | 0.015                  | 4.49                               | 0.22                   | 0.1119                                | 0.0043                 |                | 1730                                              | 40                    | 1647                                              | 73                    | 1831                                                 | 69                    | 215                         | 98                         | a                 |
| 0.1683                                               | 0.0084                 | 1.78                               | 0.11                   | 0.0769                                | 0.0030                 |                | 1039                                              | 37                    | 1003                                              | 47                    | 1117                                                 | 78                    | 170                         | 71                         | a                 |
| 0.1622                                               | 0.0081                 | 1.620                              | 0.092                  | 0.0724                                | 0.0028                 |                | 978                                               | 34                    | 969                                               | 45                    | 998                                                  | 78                    | 85                          | 60                         | a                 |
| 0.200                                                | 0.010                  | 2.38                               | 0.21                   | 0.0863                                | 0.0051                 |                | 1238                                              | 60                    | 1178                                              | 54                    | 1344                                                 | 113                   | 142                         | 65                         | a                 |
| 0.306                                                | 0.015                  | 4.76                               | 0.23                   | 0.1129                                | 0.0044                 |                | 1778                                              | 40                    | 1720                                              | 76                    | 1846                                                 | 70                    | 287                         | 112                        | a                 |
| 0.384                                                | 0.019                  | 6.29                               | 0.30                   | 0.1186                                | 0.0049                 |                | 2017                                              | 39                    | 2097                                              | 90                    | 1936                                                 | 74                    | 159                         | 112                        | a                 |
| 0.0834                                               | 0.0042                 | 1.064                              | 0.062                  | 0.0925                                | 0.0045                 |                | 736                                               | 27                    | 517                                               | 25                    | 1478                                                 | 93                    | 156                         | 69                         | r                 |
| 0.1865                                               | 0.0093                 | 2.23                               | 0.14                   | 0.0869                                | 0.0033                 |                | 1192                                              | 40                    | 1103                                              | 51                    | 1358                                                 | 74                    | 181                         | 134                        | a                 |
| 0.1592                                               | 0.0080                 | 1.669                              | 0.094                  | 0.0760                                | 0.0029                 |                | 997                                               | 34                    | 952                                               | 44                    | 1096                                                 | 77                    | 92                          | 113                        | a                 |
| 0.391                                                | 0.020                  | 4.55                               | 0.20                   | 0.0845                                | 0.0032                 |                | 1741                                              | 35                    | 2127                                              | 91                    | 1304                                                 | 74                    | 102                         | 45                         | a                 |
| 0.581                                                | 0.029                  | 8.85                               | 0.34                   | 0.1104                                | 0.0043                 |                | 2323                                              | 33                    | 2955                                              | 120                   | 1807                                                 | 70                    | 152                         | 75                         | a                 |
| 0.1792                                               | 0.0090                 | 2.20                               | 0.14                   | 0.0891                                | 0.0034                 |                | 1181                                              | 41                    | 1062                                              | 49                    | 1406                                                 | 73                    | 178                         | 97                         | a                 |
| 0.0301                                               | 0.0015                 | 0.209                              | 0.024                  | 0.0503                                | 0.0058                 |                | 193                                               | 19                    | 191                                               | 9                     | 210                                                  | 267                   | 251                         | 128                        | a                 |
| 0.1783                                               | 0.0089                 | 1.93                               | 0.12                   | 0.0786                                | 0.0030                 |                | 1092                                              | 39                    | 1057                                              | 49                    | 1163                                                 | 77                    | 205                         | 83                         | a                 |
| 0.253                                                | 0.013                  | 3.35                               | 0.18                   | 0.0961                                | 0.0037                 |                | 1492                                              | 39                    | 1451                                              | 65                    | 1550                                                 | 72                    | 110                         | 105                        | a                 |
| 0.00603                                              | 0.00030                | 0.0385                             | 0.0032                 | 0.0463                                | 0.0039                 |                | 38                                                | 3                     | 39                                                | 2                     | 15                                                   | 203                   | 152                         | 94                         | a                 |
| 0.1653                                               | 0.0083                 | 1.743                              | 0.099                  | 0.0765                                | 0.0029                 |                | 1024                                              | 35                    | 986                                               | 46                    | 1108                                                 | 76                    | 187                         | 76                         | a                 |
| 0.0458                                               | 0.0023                 | 0.331                              | 0.017                  | 0.0524                                | 0.0025                 |                | 290                                               | 12                    | 289                                               | 14                    | 303                                                  | 108                   | 215                         | 65                         | a                 |
| 0.0325                                               | 0.0016                 | 0.220                              | 0.014                  | 0.0492                                | 0.0030                 |                | 202                                               | 10                    | 206                                               | 10                    | 158                                                  | 143                   | 297                         | 149                        | a                 |

| $^{206}\text{Pb}^*/^{238}\text{U}$ | $\pm 2\sigma$<br>(abs) | $^{207}\text{Pb}^*/^{235}\text{U}$ | $\pm 2\sigma$<br>(abs) | $^{207}\text{Pb}^*/^{206}\text{Pb}^*$ | $\pm 2\sigma$<br>(abs) | corr.<br>coef. | $^{206}\text{Pb}^*/^{238}\text{U}$<br>age<br>(Ma) | $\pm 2\sigma$<br>(Ma) | $^{207}\text{Pb}^*/^{235}\text{U}$<br>age<br>(Ma) | $\pm 2\sigma$<br>(Ma) | $^{207}\text{Pb}^*/^{206}\text{Pb}^*$<br>age<br>(Ma) | $\pm 2\sigma$<br>(Ma) | Length<br>( $\mu\text{m}$ ) | Width<br>( $\mu\text{m}$ ) | Accept/<br>Reject |
|------------------------------------|------------------------|------------------------------------|------------------------|---------------------------------------|------------------------|----------------|---------------------------------------------------|-----------------------|---------------------------------------------------|-----------------------|------------------------------------------------------|-----------------------|-----------------------------|----------------------------|-------------------|
| 0.1322                             | 0.0066                 | 2.42                               | 0.26                   | 0.133                                 | 0.011                  |                | 1250                                              | 68                    | 800                                               | 38                    | 2138                                                 | 143                   | 242                         | 103                        | r                 |
| 0.1235                             | 0.0062                 | 2.40                               | 0.24                   | 0.141                                 | 0.011                  |                | 1243                                              | 63                    | 751                                               | 36                    | 2240                                                 | 135                   | 108                         | 44                         | r                 |
| 0.215                              | 0.011                  | 3.51                               | 0.27                   | 0.1180                                | 0.0062                 |                | 1529                                              | 57                    | 1258                                              | 57                    | 1927                                                 | 94                    | 183                         | 89                         | a                 |
| 0.1140                             | 0.0057                 | 1.349                              | 0.069                  | 0.0859                                | 0.0035                 |                | 867                                               | 29                    | 696                                               | 33                    | 1335                                                 | 79                    | 160                         | 105                        | a                 |
| 0.339                              | 0.017                  | 6.11                               | 0.34                   | 0.1308                                | 0.0061                 |                | 1992                                              | 46                    | 1881                                              | 82                    | 2109                                                 | 81                    | 238                         | 117                        | a                 |
| 0.258                              | 0.013                  | 5.04                               | 0.38                   | 0.1415                                | 0.0078                 |                | 1826                                              | 55                    | 1482                                              | 67                    | 2245                                                 | 95                    | 311                         | 113                        | a                 |
| 0.1090                             | 0.0054                 | 0.911                              | 0.051                  | 0.0606                                | 0.0028                 |                | 657                                               | 26                    | 667                                               | 32                    | 625                                                  | 100                   | 123                         | 73                         | a                 |
| 0.00                               | 0.00                   | 0.0046                             | 0.0022                 | 0.079                                 | 0.046                  |                | 5                                                 | 2                     | 3                                                 | 0                     | 1166                                                 | 1149                  | 226                         | 98                         | r                 |
| 0.1989                             | 0.0099                 | 2.62                               | 0.16                   | 0.0957                                | 0.0038                 |                | 1308                                              | 42                    | 1170                                              | 54                    | 1542                                                 | 75                    | 95                          | 91                         | a                 |
| 0.1739                             | 0.0087                 | 3.24                               | 0.27                   | 0.1352                                | 0.0071                 |                | 1467                                              | 62                    | 1033                                              | 48                    | 2166                                                 | 91                    | 270                         | 111                        | r                 |
| 0.1807                             | 0.0090                 | 2.30                               | 0.15                   | 0.0925                                | 0.0037                 |                | 1213                                              | 44                    | 1071                                              | 50                    | 1477                                                 | 77                    | 263                         | 113                        | a                 |
| 0.0370                             | 0.0019                 | 0.280                              | 0.016                  | 0.0549                                | 0.0029                 |                | 251                                               | 12                    | 234                                               | 12                    | 409                                                  | 118                   | 130                         | 82                         | a                 |
| 0.1785                             | 0.0089                 | 2.41                               | 0.15                   | 0.0978                                | 0.0039                 |                | 1244                                              | 44                    | 1059                                              | 49                    | 1582                                                 | 75                    | 148                         | 74                         | a                 |
| 0.237                              | 0.012                  | 3.53                               | 0.20                   | 0.1083                                | 0.0042                 |                | 1535                                              | 42                    | 1369                                              | 62                    | 1771                                                 | 71                    | 203                         | 139                        | a                 |
| 0.0327                             | 0.0016                 | 0.254                              | 0.020                  | 0.0562                                | 0.0045                 |                | 230                                               | 16                    | 208                                               | 10                    | 461                                                  | 176                   | 216                         | 114                        | a                 |
| 0.305                              | 0.015                  | 4.56                               | 0.24                   | 0.1085                                | 0.0044                 |                | 1741                                              | 40                    | 1714                                              | 76                    | 1774                                                 | 74                    | 121                         | 64                         | a                 |
| 0.1425                             | 0.0071                 | 1.521                              | 0.080                  | 0.0774                                | 0.0030                 |                | 939                                               | 31                    | 859                                               | 40                    | 1131                                                 | 76                    | 152                         | 96                         | a                 |
| 0.253                              | 0.013                  | 4.02                               | 0.21                   | 0.1152                                | 0.0044                 |                | 1638                                              | 41                    | 1455                                              | 65                    | 1883                                                 | 69                    | 219                         | 119                        | a                 |
| 0.202                              | 0.010                  | 2.65                               | 0.16                   | 0.0953                                | 0.0036                 |                | 1314                                              | 41                    | 1184                                              | 54                    | 1533                                                 | 72                    | 126                         | 92                         | a                 |
| 0.1551                             | 0.0078                 | 1.755                              | 0.096                  | 0.0821                                | 0.0031                 |                | 1029                                              | 34                    | 929                                               | 43                    | 1248                                                 | 75                    | 151                         | 82                         | a                 |
| 0.1387                             | 0.0069                 | 1.656                              | 0.087                  | 0.0866                                | 0.0034                 |                | 992                                               | 31                    | 837                                               | 39                    | 1352                                                 | 75                    | 108                         | 52                         | a                 |
| 0.0312                             | 0.0016                 | 0.2178                             | 0.0096                 | 0.0506                                | 0.0021                 |                | 200                                               | 8                     | 198                                               | 10                    | 221                                                  | 97                    | 173                         | 85                         | a                 |
| 0.367                              | 0.018                  | 6.11                               | 0.31                   | 0.1206                                | 0.0052                 |                | 1992                                              | 41                    | 2017                                              | 87                    | 1966                                                 | 77                    | 193                         | 76                         | a                 |
| 0.250                              | 0.012                  | 3.76                               | 0.20                   | 0.1090                                | 0.0042                 |                | 1583                                              | 41                    | 1438                                              | 65                    | 1783                                                 | 70                    | 277                         | 88                         | a                 |
| 0.1735                             | 0.0087                 | 2.21                               | 0.13                   | 0.0922                                | 0.0035                 |                | 1183                                              | 40                    | 1032                                              | 48                    | 1472                                                 | 73                    | 170                         | 86                         | a                 |
| 0.1462                             | 0.0073                 | 1.579                              | 0.084                  | 0.0783                                | 0.0030                 |                | 962                                               | 31                    | 879                                               | 41                    | 1156                                                 | 76                    | 205                         | 140                        | a                 |
| 0.0289                             | 0.0014                 | 0.207                              | 0.011                  | 0.0519                                | 0.0028                 |                | 191                                               | 9                     | 184                                               | 9                     | 281                                                  | 122                   | 226                         | 143                        | a                 |
| 0.1656                             | 0.0083                 | 2.02                               | 0.12                   | 0.0884                                | 0.0034                 |                | 1122                                              | 37                    | 988                                               | 46                    | 1392                                                 | 74                    | 191                         | 182                        | a                 |
| 0.0502                             | 0.0025                 | 0.397                              | 0.018                  | 0.0573                                | 0.0025                 |                | 340                                               | 13                    | 316                                               | 15                    | 505                                                  | 94                    | 254                         | 92                         | a                 |
| 0.0943                             | 0.0047                 | 0.836                              | 0.056                  | 0.0642                                | 0.0036                 |                | 617                                               | 21                    | 581                                               | 28                    | 750                                                  | 118                   | 111                         | 96                         | a                 |
| 0.0464                             | 0.0023                 | 0.343                              | 0.033                  | 0.0535                                | 0.0050                 |                | 299                                               | 24                    | 293                                               | 14                    | 351                                                  | 211                   | 252                         | 69                         | a                 |
| 0.0375                             | 0.0019                 | 1.04                               | 0.15                   | 0.201                                 | 0.027                  |                | 725                                               | 71                    | 238                                               | 12                    | 2838                                                 | 218                   | 199                         | 153                        | r                 |
| 0.0300                             | 0.0015                 | 0.182                              | 0.041                  | 0.044                                 | 0.010                  |                | 170                                               | 33                    | 190                                               | 9                     |                                                      |                       | 233                         | 94                         | a                 |
| 0.0279                             | 0.0014                 | 0.188                              | 0.013                  | 0.0489                                | 0.0032                 |                | 175                                               | 10                    | 178                                               | 9                     | 143                                                  | 155                   | 356                         | 131                        | a                 |
| 0.0241                             | 0.0012                 | 0.1754                             | 0.0072                 | 0.0528                                | 0.0022                 |                | 164                                               | 11                    | 154                                               | 8                     | 320                                                  | 94                    | 163                         | 130                        | a                 |
| 0.0297                             | 0.0015                 | 0.183                              | 0.014                  | 0.0448                                | 0.0033                 |                | 171                                               | 11                    | 188                                               | 9                     |                                                      |                       | 210                         | 98                         | a                 |
| 0.0296                             | 0.0015                 | 0.186                              | 0.031                  | 0.0457                                | 0.0076                 |                | 173                                               | 25                    | 188                                               | 9                     | -20                                                  | 403                   | 218                         | 112                        | a                 |
| 0.1223                             | 0.0061                 | 1.846                              | 0.099                  | 0.1095                                | 0.0046                 |                | 1062                                              | 34                    | 744                                               | 35                    | 1791                                                 | 76                    | 194                         | 117                        | r                 |
| <b>Zircon Standard: Remora 2</b>   |                        |                                    |                        |                                       |                        |                |                                                   |                       |                                                   |                       |                                                      |                       |                             |                            |                   |
| 0.0678                             | 0.0020                 | 0.526                              | 0.021                  | 0.0563                                | 0.0019                 |                | 423                                               | 12                    | 429                                               | 14                    | 465                                                  | 74                    |                             |                            |                   |
| 0.0644                             | 0.0019                 | 0.492                              | 0.024                  | 0.0554                                | 0.0028                 |                | 403                                               | 11                    | 406                                               | 17                    | 427                                                  | 114                   |                             |                            |                   |
| 0.0629                             | 0.0018                 | 0.469                              | 0.022                  | 0.0541                                | 0.0027                 |                | 393                                               | 11                    | 391                                               | 16                    | 377                                                  | 111                   |                             |                            |                   |
| 0.0646                             | 0.0019                 | 0.493                              | 0.021                  | 0.0554                                | 0.0022                 |                | 403                                               | 11                    | 407                                               | 15                    | 427                                                  | 90                    |                             |                            |                   |
| 0.0655                             | 0.0027                 | 0.489                              | 0.026                  | 0.0542                                | 0.0026                 |                | 409                                               | 16                    | 405                                               | 18                    | 379                                                  | 108                   |                             |                            |                   |
| 0.0669                             | 0.0027                 | 0.471                              | 0.026                  | 0.0511                                | 0.0026                 |                | 417                                               | 17                    | 392                                               | 18                    | 245                                                  | 117                   |                             |                            |                   |
| 0.0639                             | 0.0026                 | 0.485                              | 0.021                  | 0.0550                                | 0.0021                 |                | 399                                               | 16                    | 401                                               | 14                    | 413                                                  | 85                    |                             |                            |                   |
| 0.1132                             | 0.0051                 | 0.933                              | 0.061                  | 0.0597                                | 0.0032                 |                | 692                                               | 30                    | 669                                               | 32                    | 594                                                  | 117                   |                             |                            |                   |
| 0.0685                             | 0.0028                 | 0.525                              | 0.027                  | 0.0556                                | 0.0026                 |                | 427                                               | 17                    | 429                                               | 18                    | 437                                                  | 104                   |                             |                            |                   |
| 0.0693                             | 0.0029                 | 0.566                              | 0.027                  | 0.0592                                | 0.0025                 |                | 432                                               | 17                    | 455                                               | 18                    | 576                                                  | 93                    |                             |                            |                   |
| 0.0652                             | 0.0027                 | 0.475                              | 0.024                  | 0.0528                                | 0.0024                 |                | 407                                               | 16                    | 395                                               | 17                    | 320                                                  | 103                   |                             |                            |                   |
| 0.0622                             | 0.0025                 | 0.476                              | 0.020                  | 0.0555                                | 0.0021                 |                | 389                                               | 15                    | 396                                               | 14                    | 433                                                  | 85                    |                             |                            |                   |

| $^{206}\text{Pb}^*/^{238}\text{U}$ | $\pm 2\sigma$<br>(abs) | $^{207}\text{Pb}^*/^{235}\text{U}$ | $\pm 2\sigma$<br>(abs) | $^{207}\text{Pb}^*/^{206}\text{Pb}^*$ | $\pm 2\sigma$<br>(abs) | corr.<br>coef. | $^{206}\text{Pb}^*/^{238}\text{U}$<br>age<br>(Ma) | $\pm 2\sigma$<br>(Ma) | $^{207}\text{Pb}^*/^{235}\text{U}$<br>age<br>(Ma) | $\pm 2\sigma$<br>(Ma) | $^{207}\text{Pb}^*/^{206}\text{Pb}^*$<br>age<br>(Ma) | $\pm 2\sigma$<br>(Ma) | Length<br>( $\mu\text{m}$ ) | Width<br>( $\mu\text{m}$ ) | Accept/<br>Reject |
|------------------------------------|------------------------|------------------------------------|------------------------|---------------------------------------|------------------------|----------------|---------------------------------------------------|-----------------------|---------------------------------------------------|-----------------------|------------------------------------------------------|-----------------------|-----------------------------|----------------------------|-------------------|
| 0.0631                             | 0.0026                 | 0.483                              | 0.025                  | 0.0554                                | 0.0027                 |                | 395                                               | 16                    | 400                                               | 17                    | 430                                                  | 107                   |                             |                            |                   |
| 0.0623                             | 0.0025                 | 0.532                              | 0.026                  | 0.0619                                | 0.0028                 |                | 390                                               | 15                    | 433                                               | 17                    | 672                                                  | 96                    |                             |                            |                   |
| 0.0764                             | 0.0041                 | 0.596                              | 0.033                  | 0.0565                                | 0.0021                 |                | 475                                               | 25                    | 475                                               | 21                    | 473                                                  | 83                    |                             |                            |                   |
| 0.0687                             | 0.0037                 | 0.535                              | 0.031                  | 0.0565                                | 0.0022                 |                | 429                                               | 22                    | 435                                               | 21                    | 472                                                  | 87                    |                             |                            |                   |
| 0.0633                             | 0.0035                 | 0.497                              | 0.027                  | 0.0569                                | 0.0021                 |                | 396                                               | 21                    | 410                                               | 18                    | 488                                                  | 81                    |                             |                            |                   |
| 0.0601                             | 0.0033                 | 0.458                              | 0.031                  | 0.0553                                | 0.0025                 |                | 376                                               | 20                    | 383                                               | 21                    | 425                                                  | 102                   |                             |                            |                   |
| 0.0569                             | 0.0031                 | 0.439                              | 0.025                  | 0.0560                                | 0.0021                 |                | 357                                               | 19                    | 370                                               | 17                    | 451                                                  | 82                    |                             |                            |                   |
| 0.0629                             | 0.0034                 | 0.506                              | 0.032                  | 0.0583                                | 0.0025                 |                | 393                                               | 21                    | 416                                               | 21                    | 542                                                  | 92                    |                             |                            |                   |
| 0.0533                             | 0.0029                 | 0.406                              | 0.025                  | 0.0552                                | 0.0023                 |                | 335                                               | 18                    | 346                                               | 18                    | 421                                                  | 93                    |                             |                            |                   |
| 0.0960                             | 0.0051                 | 0.748                              | 0.043                  | 0.0565                                | 0.0022                 |                | 591                                               | 30                    | 567                                               | 25                    | 472                                                  | 88                    |                             |                            |                   |
| 0.0558                             | 0.0031                 | 0.433                              | 0.042                  | 0.0562                                | 0.0038                 |                | 350                                               | 19                    | 365                                               | 30                    | 461                                                  | 149                   |                             |                            |                   |
| 0.0701                             | 0.0038                 | 0.532                              | 0.033                  | 0.0551                                | 0.0024                 |                | 437                                               | 23                    | 433                                               | 22                    | 417                                                  | 96                    |                             |                            |                   |
| 0.0689                             | 0.0037                 | 0.546                              | 0.031                  | 0.0574                                | 0.0022                 |                | 429                                               | 22                    | 442                                               | 20                    | 509                                                  | 83                    |                             |                            |                   |
| 0.0561                             | 0.0031                 | 0.472                              | 0.051                  | 0.0611                                | 0.0046                 |                | 352                                               | 19                    | 393                                               | 35                    | 642                                                  | 161                   |                             |                            |                   |
| 0.0639                             | 0.0036                 | 0.436                              | 0.040                  | 0.0496                                | 0.0030                 |                | 399                                               | 22                    | 368                                               | 28                    | 175                                                  | 140                   |                             |                            |                   |
| 0.0803                             | 0.0047                 | 0.96                               | 0.17                   | 0.087                                 | 0.010                  |                | 498                                               | 28                    | 686                                               | 90                    | 1363                                                 | 225                   |                             |                            |                   |
| 0.0626                             | 0.0036                 | 0.500                              | 0.040                  | 0.0580                                | 0.0031                 |                | 391                                               | 22                    | 412                                               | 27                    | 529                                                  | 115                   |                             |                            |                   |
| 0.0802                             | 0.0046                 | 0.632                              | 0.038                  | 0.0571                                | 0.0022                 |                | 498                                               | 28                    | 497                                               | 24                    | 495                                                  | 84                    |                             |                            |                   |
| 0.0640                             | 0.0037                 | 0.585                              | 0.075                  | 0.0663                                | 0.0056                 |                | 400                                               | 22                    | 468                                               | 48                    | 816                                                  | 176                   |                             |                            |                   |
| 0.0587                             | 0.0034                 | 0.408                              | 0.032                  | 0.0504                                | 0.0026                 |                | 368                                               | 20                    | 348                                               | 23                    | 215                                                  | 119                   |                             |                            |                   |
| 0.1037                             | 0.0062                 | 0.928                              | 0.077                  | 0.0650                                | 0.0034                 |                | 636                                               | 36                    | 667                                               | 41                    | 773                                                  | 109                   |                             |                            |                   |
| 0.0699                             | 0.0040                 | 0.507                              | 0.048                  | 0.0525                                | 0.0032                 |                | 436                                               | 24                    | 416                                               | 32                    | 309                                                  | 141                   |                             |                            |                   |
| 0.0714                             | 0.0041                 | 0.534                              | 0.040                  | 0.0542                                | 0.0022                 |                | 444                                               | 25                    | 434                                               | 27                    | 381                                                  | 92                    |                             |                            |                   |
| 0.0641                             | 0.0037                 | 0.489                              | 0.032                  | 0.0553                                | 0.0017                 |                | 401                                               | 22                    | 404                                               | 22                    | 424                                                  | 69                    |                             |                            |                   |
| 0.0552                             | 0.0032                 | 0.409                              | 0.025                  | 0.0537                                | 0.0015                 |                | 346                                               | 20                    | 348                                               | 18                    | 359                                                  | 64                    |                             |                            |                   |
| 0.0726                             | 0.0041                 | 0.565                              | 0.033                  | 0.0564                                | 0.0015                 |                | 452                                               | 25                    | 455                                               | 22                    | 468                                                  | 59                    |                             |                            |                   |
| 0.0603                             | 0.0035                 | 0.462                              | 0.028                  | 0.0556                                | 0.0015                 |                | 377                                               | 21                    | 386                                               | 19                    | 436                                                  | 61                    |                             |                            |                   |
| 0.0543                             | 0.0029                 | 0.397                              | 0.023                  | 0.0530                                | 0.0015                 |                | 341                                               | 18                    | 339                                               | 17                    | 327                                                  | 65                    |                             |                            |                   |
| 0.0637                             | 0.0034                 | 0.486                              | 0.026                  | 0.0554                                | 0.0014                 |                | 398                                               | 21                    | 402                                               | 18                    | 428                                                  | 56                    |                             |                            |                   |
| 0.0413                             | 0.0022                 | 0.331                              | 0.022                  | 0.0582                                | 0.0022                 |                | 261                                               | 13                    | 290                                               | 16                    | 537                                                  | 81                    |                             |                            |                   |
| 0.0630                             | 0.0034                 | 0.483                              | 0.035                  | 0.0556                                | 0.0023                 |                | 394                                               | 21                    | 400                                               | 24                    | 437                                                  | 92                    |                             |                            |                   |
| 0.0516                             | 0.0027                 | 0.396                              | 0.022                  | 0.0556                                | 0.0015                 |                | 324                                               | 17                    | 339                                               | 16                    | 437                                                  | 60                    |                             |                            |                   |
| 0.0677                             | 0.0036                 | 0.528                              | 0.031                  | 0.0565                                | 0.0017                 |                | 422                                               | 22                    | 430                                               | 21                    | 472                                                  | 67                    |                             |                            |                   |
| 0.0757                             | 0.0041                 | 0.584                              | 0.036                  | 0.0559                                | 0.0018                 |                | 470                                               | 25                    | 467                                               | 23                    | 448                                                  | 71                    |                             |                            |                   |
| 0.0691                             | 0.0037                 | 0.528                              | 0.030                  | 0.0555                                | 0.0015                 |                | 431                                               | 22                    | 431                                               | 20                    | 431                                                  | 61                    |                             |                            |                   |
| 0.0726                             | 0.0039                 | 0.550                              | 0.031                  | 0.0549                                | 0.0014                 |                | 452                                               | 24                    | 445                                               | 20                    | 410                                                  | 58                    |                             |                            |                   |
| 0.0628                             | 0.0034                 | 0.460                              | 0.028                  | 0.0531                                | 0.0017                 |                | 392                                               | 20                    | 384                                               | 20                    | 335                                                  | 72                    |                             |                            |                   |
| 0.0719                             | 0.0042                 | 0.554                              | 0.042                  | 0.0559                                | 0.0031                 | 0.641          | 448                                               | 25                    | 447                                               | 27                    | 447                                                  | 125                   |                             |                            |                   |
| 0.0682                             | 0.0025                 | 0.438                              | 0.018                  | 0.0466                                | 0.0012                 | 0.783          | 425                                               | 15                    | 369                                               | 13                    | 27                                                   | 61                    |                             |                            |                   |
| 0.0741                             | 0.0030                 | 0.58                               | 0.12                   | 0.056                                 | 0.012                  | 0.917          | 461                                               | 18                    | 462                                               | 76                    | 464                                                  | 478                   |                             |                            |                   |
| 0.0641                             | 0.0019                 | 0.484                              | 0.022                  | 0.0547                                | 0.0027                 | 0.901          | 400                                               | 11                    | 400                                               | 15                    | 401                                                  | 112                   |                             |                            |                   |
| 0.1241                             | 0.0052                 | 1.09                               | 0.18                   | 0.0639                                | 0.0086                 | 0.962          | 754                                               | 30                    | 750                                               | 89                    | 739                                                  | 284                   |                             |                            |                   |
| 0.0667                             | 0.0020                 | 0.267                              | 0.042                  | 0.0290                                | 0.0067                 | 0.871          | 416                                               | 12                    | 240                                               | 34                    | -1261                                                | 722                   |                             |                            |                   |
| 0.0566                             | 0.0017                 | 0.220                              | 0.013                  | 0.0282                                | 0.0022                 | 0.864          | 355                                               | 10                    | 202                                               | 11                    | -1351                                                | 246                   |                             |                            |                   |
| 0.0549                             | 0.0017                 | 0.169                              | 0.011                  | 0.0224                                | 0.0019                 | 0.856          | 344                                               | 10                    | 159                                               | 10                    | -2169                                                | 332                   |                             |                            |                   |
| 0.0558                             | 0.0019                 | 0.214                              | 0.027                  | 0.0279                                | 0.0050                 | 0.847          | 350                                               | 12                    | 197                                               | 22                    | -1392                                                | 579                   |                             |                            |                   |
| 0.0547                             | 0.0018                 | 0.186                              | 0.019                  | 0.0246                                | 0.0035                 | 0.846          | 343                                               | 11                    | 173                                               | 16                    | -1818                                                | 510                   |                             |                            |                   |
| 0.0848                             | 0.0039                 | 0.570                              | 0.039                  | 0.0488                                | 0.0031                 | 0.614          | 525                                               | 23                    | 458                                               | 25                    | 136                                                  | 150                   |                             |                            |                   |
| 0.0755                             | 0.0035                 | 0.571                              | 0.031                  | 0.0549                                | 0.0020                 | 0.737          | 469                                               | 21                    | 459                                               | 20                    | 408                                                  | 82                    |                             |                            |                   |
| 0.0671                             | 0.0026                 | 0.462                              | 0.024                  | 0.0499                                | 0.0024                 | 0.532          | 419                                               | 16                    | 385                                               | 17                    | 189                                                  | 110                   |                             |                            |                   |
| 0.0620                             | 0.0026                 | 0.438                              | 0.024                  | 0.0513                                | 0.0024                 | 0.523          | 388                                               | 16                    | 369                                               | 17                    | 254                                                  | 109                   |                             |                            |                   |

| $^{206}\text{Pb}^*/^{238}\text{U}$ | $\pm 2\sigma$<br>(abs) | $^{207}\text{Pb}^*/^{235}\text{U}$ | $\pm 2\sigma$<br>(abs) | $^{207}\text{Pb}^*/^{206}\text{Pb}^*$ | $\pm 2\sigma$<br>(abs) | corr.<br>coef. | $^{206}\text{Pb}^*/^{238}\text{U}$<br>age<br>(Ma) | $\pm 2\sigma$<br>(Ma) | $^{207}\text{Pb}^*/^{235}\text{U}$<br>age<br>(Ma) | $\pm 2\sigma$<br>(Ma) | $^{207}\text{Pb}^*/^{206}\text{Pb}^*$<br>age<br>(Ma) | $\pm 2\sigma$<br>(Ma) | Length<br>( $\mu\text{m}$ ) | Width<br>( $\mu\text{m}$ ) | Accept/<br>Reject |
|------------------------------------|------------------------|------------------------------------|------------------------|---------------------------------------|------------------------|----------------|---------------------------------------------------|-----------------------|---------------------------------------------------|-----------------------|------------------------------------------------------|-----------------------|-----------------------------|----------------------------|-------------------|
| 0.0712                             | 0.0043                 | 0.497                              | 0.036                  | 0.0506                                | 0.0025                 | 0.734          | 443                                               | 26                    | 410                                               | 24                    | 224                                                  | 115                   |                             |                            |                   |
| 0.0805                             | 0.0029                 | 0.653                              | 0.033                  | 0.0589                                | 0.0026                 | 0.546          | 499                                               | 17                    | 510                                               | 20                    | 562                                                  | 98                    |                             |                            |                   |
| 0.0885                             | 0.0087                 | 0.755                              | 0.077                  | 0.0619                                | 0.0022                 | 0.888          | 547                                               | 51                    | 571                                               | 45                    | 670                                                  | 77                    |                             |                            |                   |
| 0.0606                             | 0.0020                 | 0.484                              | 0.027                  | 0.0580                                | 0.0036                 | 0.895          | 379                                               | 12                    | 401                                               | 19                    | 529                                                  | 134                   |                             |                            |                   |
| 0.0580                             | 0.0019                 | 0.456                              | 0.027                  | 0.0571                                | 0.0040                 | 0.885          | 364                                               | 12                    | 382                                               | 19                    | 494                                                  | 153                   |                             |                            |                   |
| 0.0706                             | 0.0030                 | 0.553                              | 0.032                  | 0.0568                                | 0.0029                 | 0.502          | 440                                               | 18                    | 447                                               | 21                    | 485                                                  | 113                   |                             |                            |                   |
| 0.0637                             | 0.0017                 | 0.274                              | 0.023                  | 0.0313                                | 0.0046                 | 0.841          | 398                                               | 10                    | 246                                               | 19                    | -1034                                                | 436                   |                             |                            |                   |
| 0.0629                             | 0.0015                 | 0.256                              | 0.026                  | 0.0296                                | 0.0053                 | 0.836          | 393                                               | 9                     | 232                                               | 21                    | -1205                                                | 553                   |                             |                            |                   |
| 0.0687                             | 0.0071                 | 0.433                              | 0.043                  | 0.0457                                | 0.0017                 | 0.888          | 429                                               | 43                    | 366                                               | 30                    | -16                                                  | 91                    |                             |                            |                   |
| 0.0693                             | 0.0024                 | 0.1576                             | 0.0041                 | 0.01649                               | 0.00041                | 0.884          | 432                                               | 14                    | 149                                               | 4                     | -3589                                                | 139                   |                             |                            |                   |
| 0.0645                             | 0.0015                 | 0.284                              | 0.016                  | 0.0319                                | 0.0029                 | 0.850          | 403                                               | 9                     | 254                                               | 13                    | -973                                                 | 271                   |                             |                            |                   |
| 0.0638                             | 0.0015                 | 0.465                              | 0.018                  | 0.0529                                | 0.0029                 | 0.867          | 398                                               | 9                     | 388                                               | 12                    | 323                                                  | 126                   |                             |                            |                   |
| 0.0707                             | 0.0017                 | 0.596                              | 0.020                  | 0.0611                                | 0.0025                 | 0.898          | 440                                               | 10                    | 475                                               | 13                    | 643                                                  | 88                    |                             |                            |                   |
| 0.054                              | 0.019                  | 3.031                              | 1.076                  | 0.406                                 | 0.069                  | 0.949          | 340                                               | 118                   | 1416                                              | 271                   | 3932                                                 | 253                   |                             |                            |                   |
| 0.0603                             | 0.0044                 | 0.768                              | 0.065                  | 0.0923                                | 0.0083                 | 0.898          | 378                                               | 27                    | 578                                               | 37                    | 1473                                                 | 171                   |                             |                            |                   |
| 0.0874                             | 0.0045                 | 0.659                              | 0.039                  | 0.0547                                | 0.0021                 | 0.787          | 540                                               | 27                    | 514                                               | 24                    | 398                                                  | 88                    |                             |                            |                   |
| 0.0686                             | 0.0015                 | 0.490                              | 0.017                  | 0.0518                                | 0.0027                 | 0.875          | 428                                               | 9                     | 405                                               | 12                    | 275                                                  | 118                   |                             |                            |                   |
| 0.0687                             | 0.0015                 | 0.503                              | 0.018                  | 0.0530                                | 0.0027                 | 0.877          | 428                                               | 9                     | 413                                               | 12                    | 331                                                  | 115                   |                             |                            |                   |
| 0.0672                             | 0.0014                 | 0.495                              | 0.020                  | 0.0534                                | 0.0035                 | 0.861          | 419                                               | 8                     | 408                                               | 14                    | 347                                                  | 146                   |                             |                            |                   |
| 0.0540                             | 0.0064                 | 0.13                               | 0.17                   | 0.017                                 | 0.032                  | 0.832          | 339                                               | 39                    | 123                                               | 149                   | -3334                                                | 9852                  |                             |                            |                   |
| 0.0679                             | 0.0036                 | 0.74                               | 0.24                   | 0.079                                 | 0.038                  | 0.871          | 424                                               | 21                    | 562                                               | 137                   | 1171                                                 | 957                   |                             |                            |                   |
| 0.0712                             | 0.0038                 | 0.54                               | 0.19                   | 0.055                                 | 0.029                  | 0.874          | 444                                               | 23                    | 436                                               | 123                   | 399                                                  | 1200                  |                             |                            |                   |
| 0.0680                             | 0.0021                 | 0.496                              | 0.030                  | 0.0529                                | 0.0043                 | 0.885          | 424                                               | 12                    | 409                                               | 21                    | 326                                                  | 186                   |                             |                            |                   |
| 0.0595                             | 0.0020                 | 0.455                              | 0.021                  | 0.0555                                | 0.0025                 | 0.905          | 372                                               | 12                    | 381                                               | 15                    | 431                                                  | 100                   |                             |                            |                   |
| 0.0811                             | 0.0027                 | 0.694                              | 0.040                  | 0.0620                                | 0.0043                 | 0.915          | 503                                               | 16                    | 535                                               | 24                    | 675                                                  | 147                   |                             |                            |                   |
| 0.0837                             | 0.0024                 | 0.713                              | 0.036                  | 0.0618                                | 0.0036                 | 0.919          | 518                                               | 15                    | 547                                               | 21                    | 666                                                  | 125                   |                             |                            |                   |
| 0.0850                             | 0.0028                 | 0.723                              | 0.028                  | 0.0617                                | 0.0019                 | 0.696          | 526                                               | 17                    | 553                                               | 17                    | 664                                                  | 64                    |                             |                            |                   |
| 0.0639                             | 0.0022                 | 0.535                              | 0.030                  | 0.0607                                | 0.0038                 | 0.898          | 400                                               | 13                    | 435                                               | 20                    | 627                                                  | 136                   |                             |                            |                   |
| 0.0847                             | 0.0028                 | 0.759                              | 0.037                  | 0.0650                                | 0.0034                 | 0.927          | 524                                               | 17                    | 574                                               | 21                    | 774                                                  | 109                   |                             |                            |                   |
| 0.0821                             | 0.0027                 | 0.635                              | 0.030                  | 0.0561                                | 0.0027                 | 0.473          | 509                                               | 16                    | 499                                               | 19                    | 455                                                  | 108                   |                             |                            |                   |
| 0.0673                             | 0.0027                 | 0.545                              | 0.029                  | 0.0587                                | 0.0028                 | 0.921          | 420                                               | 16                    | 442                                               | 19                    | 555                                                  | 104                   |                             |                            |                   |
| 0.0644                             | 0.0023                 | 0.516                              | 0.026                  | 0.0581                                | 0.0030                 | 0.908          | 402                                               | 14                    | 422                                               | 18                    | 534                                                  | 113                   |                             |                            |                   |
| 0.0669                             | 0.0015                 | 0.482                              | 0.017                  | 0.0523                                | 0.0029                 | 0.868          | 417                                               | 9                     | 400                                               | 12                    | 299                                                  | 125                   |                             |                            |                   |
| 0.0723                             | 0.0017                 | 0.629                              | 0.024                  | 0.0631                                | 0.0037                 | 0.879          | 450                                               | 10                    | 495                                               | 15                    | 711                                                  | 124                   |                             |                            |                   |
| 0.0657                             | 0.0014                 | 0.499                              | 0.017                  | 0.0551                                | 0.0030                 | 0.864          | 410                                               | 8                     | 411                                               | 12                    | 416                                                  | 120                   |                             |                            |                   |
| 0.0792                             | 0.0024                 | 0.660                              | 0.038                  | 0.0605                                | 0.0056                 | 0.882          | 491                                               | 14                    | 515                                               | 23                    | 620                                                  | 201                   |                             |                            |                   |
| 0.0652                             | 0.0014                 | 0.497                              | 0.018                  | 0.0553                                | 0.0032                 | 0.860          | 407                                               | 9                     | 410                                               | 12                    | 425                                                  | 130                   |                             |                            |                   |
| 0.0623                             | 0.0059                 | 0.465                              | 0.048                  | 0.0541                                | 0.0017                 | 0.889          | 390                                               | 36                    | 388                                               | 34                    | 375                                                  | 69                    |                             |                            |                   |
| 0.0725                             | 0.0073                 | 0.552                              | 0.062                  | 0.0552                                | 0.0018                 | 0.905          | 451                                               | 44                    | 446                                               | 40                    | 422                                                  | 71                    |                             |                            |                   |
| 0.0630                             | 0.0060                 | 0.484                              | 0.054                  | 0.0557                                | 0.0020                 | 0.872          | 394                                               | 37                    | 401                                               | 37                    | 440                                                  | 79                    |                             |                            |                   |
| 0.0737                             | 0.0075                 | 0.573                              | 0.063                  | 0.0564                                | 0.0017                 | 0.910          | 458                                               | 45                    | 460                                               | 41                    | 466                                                  | 67                    |                             |                            |                   |
| 0.0741                             | 0.0077                 | 0.539                              | 0.068                  | 0.0528                                | 0.0026                 | 0.866          | 461                                               | 46                    | 438                                               | 45                    | 322                                                  | 113                   |                             |                            |                   |
| 0.0628                             | 0.0059                 | 0.471                              | 0.051                  | 0.0544                                | 0.0019                 | 0.874          | 393                                               | 36                    | 392                                               | 35                    | 389                                                  | 79                    |                             |                            |                   |
| 0.0755                             | 0.0073                 | 0.571                              | 0.064                  | 0.0548                                | 0.0023                 | 0.878          | 469                                               | 44                    | 459                                               | 42                    | 405                                                  | 92                    |                             |                            |                   |
| 0.0725                             | 0.0070                 | 0.546                              | 0.061                  | 0.0546                                | 0.0021                 | 0.882          | 451                                               | 42                    | 442                                               | 40                    | 396                                                  | 86                    |                             |                            |                   |
| 0.0659                             | 0.0064                 | 0.472                              | 0.053                  | 0.0520                                | 0.0021                 | 0.871          | 411                                               | 38                    | 393                                               | 36                    | 283                                                  | 91                    |                             |                            |                   |
| 0.0652                             | 0.0062                 | 0.521                              | 0.070                  | 0.0579                                | 0.0043                 | 0.733          | 407                                               | 38                    | 426                                               | 47                    | 526                                                  | 164                   |                             |                            |                   |
| 0.0710                             | 0.0070                 | 0.74                               | 0.15                   | 0.075                                 | 0.011                  | 0.949          | 442                                               | 42                    | 561                                               | 86                    | 1079                                                 | 285                   |                             |                            |                   |
| 0.0663                             | 0.0061                 | 0.478                              | 0.052                  | 0.0523                                | 0.0025                 | 0.836          | 414                                               | 37                    | 396                                               | 36                    | 296                                                  | 110                   |                             |                            |                   |
| 0.0650                             | 0.0059                 | 0.482                              | 0.049                  | 0.0538                                | 0.0019                 | 0.871          | 406                                               | 36                    | 400                                               | 33                    | 362                                                  | 81                    |                             |                            |                   |
| 0.0624                             | 0.0057                 | 0.453                              | 0.050                  | 0.0527                                | 0.0028                 | 0.809          | 390                                               | 35                    | 380                                               | 35                    | 316                                                  | 119                   |                             |                            |                   |

| $^{206}\text{Pb}^*/^{238}\text{U}$ | $\pm 2\sigma$<br>(abs) | $^{207}\text{Pb}^*/^{235}\text{U}$ | $\pm 2\sigma$<br>(abs) | $^{207}\text{Pb}^*/^{206}\text{Pb}^*$ | $\pm 2\sigma$<br>(abs) | corr.<br>coef. | $^{206}\text{Pb}^*/^{238}\text{U}$<br>age<br>(Ma) | $\pm 2\sigma$<br>(Ma) | $^{207}\text{Pb}^*/^{235}\text{U}$<br>age<br>(Ma) | $\pm 2\sigma$<br>(Ma) | $^{207}\text{Pb}^*/^{206}\text{Pb}^*$<br>age<br>(Ma) | $\pm 2\sigma$<br>(Ma) | Length<br>( $\mu\text{m}$ ) | Width<br>( $\mu\text{m}$ ) | Accept/<br>Reject |
|------------------------------------|------------------------|------------------------------------|------------------------|---------------------------------------|------------------------|----------------|---------------------------------------------------|-----------------------|---------------------------------------------------|-----------------------|------------------------------------------------------|-----------------------|-----------------------------|----------------------------|-------------------|
| 0.0615                             | 0.0056                 | 0.451                              | 0.048                  | 0.0532                                | 0.0023                 | 0.836          | 385                                               | 34                    | 378                                               | 33                    | 337                                                  | 99                    |                             |                            |                   |
| 0.0643                             | 0.0059                 | 0.475                              | 0.049                  | 0.0535                                | 0.0021                 | 0.858          | 402                                               | 36                    | 394                                               | 34                    | 351                                                  | 90                    |                             |                            |                   |
| 0.0899                             | 0.0085                 | 0.695                              | 0.070                  | 0.0561                                | 0.0016                 | 0.925          | 555                                               | 50                    | 536                                               | 42                    | 456                                                  | 63                    |                             |                            |                   |
| 0.0904                             | 0.0090                 | 0.794                              | 0.099                  | 0.0637                                | 0.0040                 | 0.830          | 558                                               | 53                    | 594                                               | 56                    | 733                                                  | 132                   |                             |                            |                   |
| 0.0668                             | 0.0062                 | 0.519                              | 0.055                  | 0.0564                                | 0.0026                 | 0.837          | 417                                               | 37                    | 424                                               | 37                    | 468                                                  | 101                   |                             |                            |                   |
| 0.0671                             | 0.0062                 | 0.497                              | 0.051                  | 0.0537                                | 0.0020                 | 0.875          | 419                                               | 38                    | 409                                               | 35                    | 357                                                  | 83                    |                             |                            |                   |
| 0.0641                             | 0.0059                 | 0.469                              | 0.050                  | 0.0531                                | 0.0024                 | 0.835          | 400                                               | 35                    | 391                                               | 35                    | 333                                                  | 104                   |                             |                            |                   |
| 0.0695                             | 0.0054                 | 0.520                              | 0.047                  | 0.0542                                | 0.0025                 | 0.819          | 433                                               | 32                    | 425                                               | 31                    | 380                                                  | 102                   |                             |                            |                   |
| 0.0708                             | 0.0055                 | 0.587                              | 0.064                  | 0.0602                                | 0.0047                 | 0.675          | 441                                               | 33                    | 469                                               | 41                    | 610                                                  | 167                   |                             |                            |                   |
| 0.0674                             | 0.0052                 | 0.465                              | 0.049                  | 0.0500                                | 0.0036                 | 0.727          | 421                                               | 31                    | 388                                               | 34                    | 196                                                  | 169                   |                             |                            |                   |
| 0.0684                             | 0.0052                 | 0.506                              | 0.043                  | 0.0536                                | 0.0020                 | 0.845          | 427                                               | 32                    | 416                                               | 29                    | 356                                                  | 86                    |                             |                            |                   |
| 0.0729                             | 0.0057                 | 0.551                              | 0.048                  | 0.0548                                | 0.0019                 | 0.871          | 454                                               | 35                    | 446                                               | 31                    | 405                                                  | 77                    |                             |                            |                   |
| 0.0667                             | 0.0051                 | 0.502                              | 0.042                  | 0.0546                                | 0.0018                 | 0.862          | 416                                               | 31                    | 413                                               | 28                    | 396                                                  | 73                    |                             |                            |                   |
| 0.0693                             | 0.0054                 | 0.528                              | 0.047                  | 0.0553                                | 0.0022                 | 0.838          | 432                                               | 32                    | 431                                               | 31                    | 424                                                  | 90                    |                             |                            |                   |
| 0.0675                             | 0.0052                 | 0.505                              | 0.042                  | 0.0543                                | 0.0018                 | 0.864          | 421                                               | 32                    | 415                                               | 29                    | 382                                                  | 74                    |                             |                            |                   |
| 0.0682                             | 0.0052                 | 0.521                              | 0.045                  | 0.0554                                | 0.0022                 | 0.834          | 426                                               | 32                    | 426                                               | 30                    | 429                                                  | 89                    |                             |                            |                   |
| 0.0654                             | 0.0050                 | 0.509                              | 0.043                  | 0.0565                                | 0.0020                 | 0.840          | 408                                               | 30                    | 418                                               | 29                    | 470                                                  | 79                    |                             |                            |                   |
| 0.0670                             | 0.0051                 | 0.515                              | 0.048                  | 0.0557                                | 0.0030                 | 0.771          | 418                                               | 31                    | 422                                               | 32                    | 442                                                  | 120                   |                             |                            |                   |
| 0.0875                             | 0.0069                 | 0.716                              | 0.062                  | 0.0594                                | 0.0019                 | 0.895          | 540                                               | 41                    | 548                                               | 37                    | 580                                                  | 68                    |                             |                            |                   |
| 0.0896                             | 0.0077                 | 0.687                              | 0.065                  | 0.0556                                | 0.0019                 | 0.902          | 553                                               | 46                    | 531                                               | 39                    | 436                                                  | 77                    |                             |                            |                   |
| 0.0845                             | 0.0068                 | 0.644                              | 0.062                  | 0.0553                                | 0.0026                 | 0.854          | 523                                               | 41                    | 505                                               | 38                    | 425                                                  | 103                   |                             |                            |                   |
| 0.0770                             | 0.0063                 | 0.601                              | 0.053                  | 0.0566                                | 0.0018                 | 0.889          | 478                                               | 38                    | 478                                               | 34                    | 477                                                  | 69                    |                             |                            |                   |
| 0.0756                             | 0.0059                 | 0.597                              | 0.049                  | 0.0572                                | 0.0017                 | 0.885          | 470                                               | 35                    | 475                                               | 31                    | 499                                                  | 66                    |                             |                            |                   |
| 0.0681                             | 0.0052                 | 0.521                              | 0.045                  | 0.0555                                | 0.0021                 | 0.842          | 425                                               | 32                    | 426                                               | 30                    | 431                                                  | 84                    |                             |                            |                   |
| 0.0745                             | 0.0058                 | 0.591                              | 0.068                  | 0.0575                                | 0.0051                 | 0.664          | 463                                               | 35                    | 471                                               | 44                    | 511                                                  | 196                   |                             |                            |                   |
| 0.0691                             | 0.0053                 | 0.537                              | 0.044                  | 0.0564                                | 0.0017                 | 0.874          | 431                                               | 32                    | 437                                               | 29                    | 467                                                  | 66                    |                             |                            |                   |
| 0.0706                             | 0.0055                 | 0.524                              | 0.045                  | 0.0538                                | 0.0022                 | 0.844          | 440                                               | 33                    | 428                                               | 30                    | 364                                                  | 90                    |                             |                            |                   |
| 0.0701                             | 0.0062                 | 0.536                              | 0.056                  | 0.0554                                | 0.0028                 | 0.800          | 437                                               | 38                    | 436                                               | 37                    | 428                                                  | 113                   |                             |                            |                   |
| 0.0682                             | 0.0060                 | 0.511                              | 0.053                  | 0.0543                                | 0.0027                 | 0.800          | 425                                               | 36                    | 419                                               | 35                    | 384                                                  | 112                   |                             |                            |                   |
| 0.0775                             | 0.0069                 | 0.626                              | 0.067                  | 0.0586                                | 0.0031                 | 0.801          | 481                                               | 41                    | 494                                               | 42                    | 552                                                  | 117                   |                             |                            |                   |
| 0.0637                             | 0.0055                 | 0.441                              | 0.052                  | 0.0502                                | 0.0038                 | 0.674          | 398                                               | 33                    | 371                                               | 37                    | 206                                                  | 175                   |                             |                            |                   |
| 0.0636                             | 0.0054                 | 0.480                              | 0.044                  | 0.0547                                | 0.0017                 | 0.858          | 398                                               | 33                    | 398                                               | 30                    | 399                                                  | 71                    |                             |                            |                   |
| 0.0604                             | 0.0052                 | 0.444                              | 0.042                  | 0.0534                                | 0.0019                 | 0.836          | 378                                               | 31                    | 373                                               | 29                    | 345                                                  | 80                    |                             |                            |                   |
| 0.0600                             | 0.0052                 | 0.437                              | 0.048                  | 0.0529                                | 0.0035                 | 0.689          | 376                                               | 32                    | 368                                               | 34                    | 324                                                  | 149                   |                             |                            |                   |
| 0.0654                             | 0.0056                 | 0.506                              | 0.046                  | 0.0561                                | 0.0016                 | 0.875          | 408                                               | 34                    | 416                                               | 31                    | 458                                                  | 63                    |                             |                            |                   |
| 0.0607                             | 0.0052                 | 0.486                              | 0.045                  | 0.0580                                | 0.0020                 | 0.831          | 380                                               | 31                    | 402                                               | 31                    | 530                                                  | 75                    |                             |                            |                   |
| 0.0638                             | 0.0055                 | 0.520                              | 0.050                  | 0.0592                                | 0.0025                 | 0.801          | 399                                               | 33                    | 425                                               | 33                    | 574                                                  | 90                    |                             |                            |                   |
| 0.0655                             | 0.0056                 | 0.529                              | 0.057                  | 0.0586                                | 0.0035                 | 0.714          | 409                                               | 34                    | 431                                               | 38                    | 552                                                  | 132                   |                             |                            |                   |
| 0.0709                             | 0.0065                 | 0.593                              | 0.064                  | 0.0607                                | 0.0033                 | 0.778          | 442                                               | 39                    | 473                                               | 41                    | 627                                                  | 116                   |                             |                            |                   |
| 0.0635                             | 0.0054                 | 0.465                              | 0.052                  | 0.0531                                | 0.0038                 | 0.676          | 397                                               | 33                    | 388                                               | 36                    | 333                                                  | 161                   |                             |                            |                   |
| 0.0658                             | 0.0058                 | 0.506                              | 0.047                  | 0.0558                                | 0.0015                 | 0.888          | 411                                               | 35                    | 416                                               | 32                    | 443                                                  | 59                    |                             |                            |                   |
| 0.0603                             | 0.0052                 | 0.466                              | 0.044                  | 0.0561                                | 0.0020                 | 0.829          | 377                                               | 32                    | 389                                               | 31                    | 456                                                  | 80                    |                             |                            |                   |
| 0.0828                             | 0.0076                 | 0.728                              | 0.077                  | 0.0638                                | 0.0031                 | 0.823          | 513                                               | 45                    | 556                                               | 45                    | 736                                                  | 102                   |                             |                            |                   |
| 0.0720                             | 0.0064                 | 0.576                              | 0.055                  | 0.0581                                | 0.0020                 | 0.862          | 448                                               | 38                    | 462                                               | 36                    | 532                                                  | 76                    |                             |                            |                   |
| 0.0647                             | 0.0056                 | 0.500                              | 0.045                  | 0.0560                                | 0.0015                 | 0.882          | 404                                               | 34                    | 411                                               | 31                    | 452                                                  | 59                    |                             |                            |                   |
| 0.0631                             | 0.0054                 | 0.488                              | 0.046                  | 0.0561                                | 0.0021                 | 0.831          | 394                                               | 33                    | 404                                               | 31                    | 458                                                  | 82                    |                             |                            |                   |
| 0.0748                             | 0.0066                 | 0.565                              | 0.053                  | 0.0548                                | 0.0017                 | 0.884          | 465                                               | 39                    | 455                                               | 35                    | 405                                                  | 71                    |                             |                            |                   |
| 0.0676                             | 0.0058                 | 0.505                              | 0.046                  | 0.0542                                | 0.0015                 | 0.886          | 422                                               | 35                    | 415                                               | 31                    | 377                                                  | 62                    |                             |                            |                   |
| 0.0651                             | 0.0056                 | 0.461                              | 0.050                  | 0.0514                                | 0.0031                 | 0.750          | 407                                               | 34                    | 385                                               | 35                    | 257                                                  | 138                   |                             |                            |                   |
| 0.111                              | 0.010                  | 0.954                              | 0.099                  | 0.0622                                | 0.0024                 | 0.899          | 681                                               | 60                    | 680                                               | 52                    | 680                                                  | 84                    |                             |                            |                   |
| 0.0659                             | 0.0057                 | 0.534                              | 0.053                  | 0.0588                                | 0.0028                 | 0.778          | 411                                               | 34                    | 434                                               | 35                    | 558                                                  | 105                   |                             |                            |                   |

| $^{206}\text{Pb}^*/^{238}\text{U}$ | $\pm 2\sigma$<br>(abs) | $^{207}\text{Pb}^*/^{235}\text{U}$ | $\pm 2\sigma$<br>(abs) | $^{207}\text{Pb}^*/^{206}\text{Pb}^*$ | $\pm 2\sigma$<br>(abs) | corr.<br>coef. | $^{206}\text{Pb}^*/^{238}\text{U}$<br>age<br>(Ma) | $\pm 2\sigma$<br>(Ma) | $^{207}\text{Pb}^*/^{235}\text{U}$<br>age<br>(Ma) | $\pm 2\sigma$<br>(Ma) | $^{207}\text{Pb}^*/^{206}\text{Pb}^*$<br>age<br>(Ma) | $\pm 2\sigma$<br>(Ma) | Length<br>( $\mu\text{m}$ ) | Width<br>( $\mu\text{m}$ ) | Accept/<br>Reject |
|------------------------------------|------------------------|------------------------------------|------------------------|---------------------------------------|------------------------|----------------|---------------------------------------------------|-----------------------|---------------------------------------------------|-----------------------|------------------------------------------------------|-----------------------|-----------------------------|----------------------------|-------------------|
| 0.0743                             | 0.0065                 | 0.590                              | 0.056                  | 0.0576                                | 0.0019                 | 0.875          | 462                                               | 39                    | 471                                               | 35                    | 514                                                  | 71                    |                             |                            |                   |
| 0.0698                             | 0.0060                 | 0.560                              | 0.060                  | 0.0582                                | 0.0035                 | 0.742          | 435                                               | 36                    | 452                                               | 39                    | 538                                                  | 130                   |                             |                            |                   |
| 0.0765                             | 0.0068                 | 0.596                              | 0.064                  | 0.0565                                | 0.0032                 | 0.788          | 475                                               | 41                    | 475                                               | 41                    | 472                                                  | 127                   |                             |                            |                   |
| 0.0688                             | 0.0052                 | 0.537                              | 0.058                  | 0.0566                                | 0.0032                 | 0.725          | 429                                               | 31                    | 436                                               | 38                    | 476                                                  | 123                   |                             |                            |                   |
| 0.0639                             | 0.0034                 | 0.497                              | 0.044                  | 0.0564                                | 0.0031                 | 0.557          | 400                                               | 21                    | 410                                               | 30                    | 468                                                  | 120                   |                             |                            |                   |
| 0.0669                             | 0.0042                 | 0.503                              | 0.043                  | 0.0546                                | 0.0022                 | 0.767          | 417                                               | 26                    | 414                                               | 29                    | 395                                                  | 91                    |                             |                            |                   |
| 0.0559                             | 0.0029                 | 0.395                              | 0.031                  | 0.0512                                | 0.0022                 | 0.637          | 351                                               | 18                    | 338                                               | 23                    | 252                                                  | 100                   |                             |                            |                   |
| 0.0538                             | 0.0028                 | 0.454                              | 0.045                  | 0.0612                                | 0.0037                 | 0.933          | 338                                               | 17                    | 380                                               | 31                    | 647                                                  | 130                   |                             |                            |                   |
| 0.0645                             | 0.0035                 | 0.493                              | 0.040                  | 0.0555                                | 0.0026                 | 0.660          | 403                                               | 21                    | 407                                               | 27                    | 433                                                  | 103                   |                             |                            |                   |
| 0.0669                             | 0.0053                 | 0.516                              | 0.064                  | 0.0560                                | 0.0039                 | 0.657          | 417                                               | 32                    | 423                                               | 43                    | 452                                                  | 156                   |                             |                            |                   |
| 0.0952                             | 0.0060                 | 0.786                              | 0.094                  | 0.0599                                | 0.0044                 | 0.668          | 586                                               | 35                    | 589                                               | 54                    | 600                                                  | 158                   |                             |                            |                   |
| 0.0590                             | 0.0034                 | 0.444                              | 0.031                  | 0.0545                                | 0.0017                 | 0.778          | 370                                               | 20                    | 373                                               | 22                    | 392                                                  | 69                    |                             |                            |                   |
| 0.0628                             | 0.0053                 | 0.528                              | 0.071                  | 0.0609                                | 0.0047                 | 0.567          | 393                                               | 32                    | 430                                               | 47                    | 636                                                  | 166                   |                             |                            |                   |
| 0.0913                             | 0.0048                 | 0.746                              | 0.050                  | 0.0593                                | 0.0023                 | 0.794          | 563                                               | 28                    | 566                                               | 29                    | 578                                                  | 83                    |                             |                            |                   |
| 0.0791                             | 0.0036                 | 0.733                              | 0.059                  | 0.0672                                | 0.0042                 | 0.943          | 491                                               | 22                    | 558                                               | 35                    | 844                                                  | 129                   |                             |                            |                   |
| 0.0664                             | 0.0030                 | 0.528                              | 0.039                  | 0.0577                                | 0.0032                 | 0.933          | 415                                               | 18                    | 430                                               | 26                    | 517                                                  | 122                   |                             |                            |                   |
| 0.0691                             | 0.0031                 | 0.561                              | 0.038                  | 0.0589                                | 0.0028                 | 0.566          | 430                                               | 19                    | 452                                               | 25                    | 563                                                  | 103                   |                             |                            |                   |
| 0.0773                             | 0.0037                 | 0.601                              | 0.037                  | 0.0563                                | 0.0019                 | 0.765          | 480                                               | 22                    | 478                                               | 23                    | 466                                                  | 76                    |                             |                            |                   |
| 0.0614                             | 0.0028                 | 0.458                              | 0.032                  | 0.0541                                | 0.0027                 | 0.508          | 384                                               | 17                    | 383                                               | 22                    | 376                                                  | 111                   |                             |                            |                   |
| 0.0786                             | 0.0040                 | 0.600                              | 0.036                  | 0.0554                                | 0.0017                 | 0.820          | 488                                               | 24                    | 477                                               | 23                    | 426                                                  | 67                    |                             |                            |                   |
| 0.0880                             | 0.0062                 | 0.757                              | 0.067                  | 0.0624                                | 0.0029                 | 0.793          | 544                                               | 37                    | 572                                               | 39                    | 687                                                  | 100                   |                             |                            |                   |
| 0.0636                             | 0.0030                 | 0.464                              | 0.029                  | 0.0529                                | 0.0020                 | 0.701          | 397                                               | 18                    | 387                                               | 20                    | 326                                                  | 84                    |                             |                            |                   |
| 0.0657                             | 0.0057                 | 0.473                              | 0.046                  | 0.0522                                | 0.0020                 | 0.848          | 410                                               | 35                    | 393                                               | 32                    | 296                                                  | 86                    |                             |                            |                   |
| 0.0630                             | 0.0024                 | 0.488                              | 0.026                  | 0.0562                                | 0.0021                 | 0.585          | 394                                               | 15                    | 404                                               | 17                    | 460                                                  | 82                    |                             |                            |                   |
| 0.0631                             | 0.0024                 | 0.480                              | 0.023                  | 0.0552                                | 0.0018                 | 0.658          | 394                                               | 15                    | 398                                               | 16                    | 420                                                  | 71                    |                             |                            |                   |
| 0.0670                             | 0.0026                 | 0.492                              | 0.027                  | 0.0533                                | 0.0022                 | 0.579          | 418                                               | 16                    | 407                                               | 18                    | 341                                                  | 95                    |                             |                            |                   |
| 0.0648                             | 0.0025                 | 0.455                              | 0.037                  | 0.0510                                | 0.0040                 | 0.914          | 405                                               | 15                    | 381                                               | 26                    | 240                                                  | 179                   |                             |                            |                   |
| 0.0640                             | 0.0025                 | 0.470                              | 0.032                  | 0.0533                                | 0.0033                 | 0.919          | 400                                               | 15                    | 391                                               | 22                    | 340                                                  | 138                   |                             |                            |                   |
| 0.071                              | 0.013                  | 1.14                               | 0.12                   | 0.1159                                | 0.0080                 | 0.715          | 443                                               | 77                    | 771                                               | 58                    | 1894                                                 | 124                   |                             |                            |                   |
| 0.065                              | 0.010                  | 0.703                              | 0.075                  | 0.0786                                | 0.0047                 | 0.787          | 405                                               | 61                    | 541                                               | 45                    | 1162                                                 | 119                   |                             |                            |                   |
| 0.0634                             | 0.0085                 | 0.666                              | 0.071                  | 0.0763                                | 0.0032                 | 0.833          | 396                                               | 52                    | 519                                               | 43                    | 1102                                                 | 85                    |                             |                            |                   |
| 0.070                              | 0.010                  | 0.632                              | 0.068                  | 0.0660                                | 0.0032                 | 0.860          | 433                                               | 61                    | 498                                               | 42                    | 805                                                  | 100                   |                             |                            |                   |
| 0.0713                             | 0.0094                 | 0.618                              | 0.067                  | 0.0629                                | 0.0023                 | 0.889          | 444                                               | 56                    | 489                                               | 42                    | 706                                                  | 78                    |                             |                            |                   |
| 0.0644                             | 0.0087                 | 1.46                               | 0.16                   | 0.165                                 | 0.018                  | 0.910          | 402                                               | 53                    | 915                                               | 65                    | 2505                                                 | 183                   |                             |                            |                   |
| 0.077                              | 0.012                  | 1.42                               | 0.16                   | 0.135                                 | 0.013                  | 0.934          | 476                                               | 71                    | 899                                               | 66                    | 2160                                                 | 168                   |                             |                            |                   |
| 0.082                              | 0.015                  | 2.23                               | 0.25                   | 0.196                                 | 0.013                  | 0.591          | 509                                               | 90                    | 1190                                              | 80                    | 2797                                                 | 109                   |                             |                            |                   |
| 0.069                              | 0.013                  | 1.10                               | 0.12                   | 0.1154                                | 0.0091                 | 0.678          | 430                                               | 79                    | 752                                               | 59                    | 1886                                                 | 142                   |                             |                            |                   |
| 0.105                              | 0.024                  | 4.70                               | 0.57                   | 0.326                                 | 0.029                  | 0.958          | 642                                               | 139                   | 1768                                              | 101                   | 3598                                                 | 139                   |                             |                            |                   |
| 0.086                              | 0.012                  | 2.00                               | 0.22                   | 0.1677                                | 0.0065                 | 0.759          | 535                                               | 68                    | 1116                                              | 76                    | 2535                                                 | 65                    |                             |                            |                   |
| 0.0659                             | 0.0096                 | 0.698                              | 0.074                  | 0.0767                                | 0.0033                 | 0.845          | 412                                               | 58                    | 537                                               | 44                    | 1114                                                 | 87                    |                             |                            |                   |
| 0.081                              | 0.029                  | 1.59                               | 0.19                   | 0.143                                 | 0.012                  | 0.808          | 500                                               | 174                   | 965                                               | 73                    | 2261                                                 | 148                   |                             |                            |                   |

(1) Blank entries indicate that no data was collected. For absent correlation coefficients, data was collected prior to introduction of calculation algorithm.

(2) Correlation coefficients marked \*\*, no significant correlation was found.

† Indicates which analyses were included in age spectra and statistical tests. a- accepted analysis, b- rejected analysis
